# Supplementary material
Source: ML conference proceedings conference paper supplement (https://aclanthology.org/N18-1036)
Supplement: Datasets [file N18-1036.Datasets.zip]

# 1 True positives (AH as AH) 88

## 533\_ah\_t1\_cvbsu3r.json (ah-ah)

(OOV\_comment\_begin) Bob could have experienced God. Plenty of people honestly believe they have. You are basically saying that you are never wrong , and never believe anything that is n't provable , but other people are. There are lots of people in this world that are smarter than you who do believe in god

(OOV\_comment\_begin) No , I 'm saying I put stock in concrete , measurable , observable , OOV , and empirical experience over the intangible , OOV , and OOV phenomenon the religious call “ faith. ” Remembering that I walked my dog yesterday is not an act of “ faith ” the same way that believing in an all-powerful benevolent entity watching over us is an “ act of faith , ” and it is utterly laughable that you keep trying to conflate the two. Edit - to clarify , though , YES I am OOV saying that knowledge or data gained through empirical observation and perception is superior - more useful , more likely accurate , more “ true ” - than knowledge gained through “ I have faith in this so it must be. ” Absolutely , emphatically , 100 %

(OOV\_comment\_begin) Believing yesterday even happened requires faith. You can not prove that yesterday happened .

## 855\_ah\_t1\_dmwg8w7.json (ah-ah)

(OOV\_comment\_begin) OOV That 's the interesting thing is that the results were n't statistically different based on sex of the OOV If you look at the study you can see the two pictures , I 'd say both were fairly OOV While I 'm sure further research in the area is needed , that does n't mean the preliminary results are OOV OOV I invite you to cite alternates studies however .

(OOV\_comment\_begin) That just underlines my point. Not to mention the study used entirely university students and only 50 or so speaks volumes .

(OOV\_comment\_begin) criticizing a study design is not citing more evidence. Even if it 's university students with a small sample size , it demonstrates “ possible ” thus OOV cite 1 of the OOV Additionally the results were confirmed in “ From Sex Objects to Human Beings ” OOV et OOV ( 2015 ) I invite you to cite alternate studies .

## 501\_ah\_t1\_d9kyjre.json (ah-ah)

(OOV\_comment\_begin) Lol he 'll still be in the OOV And you do n't think he 'll have any influence over Hillary ?

(OOV\_comment\_begin) First of all , Bill Clinton was an excellent president regardless of the OOV Secondly , even taking the affair into consideration , at least it was consensual - unlike grabbing a woman by the OOV Third , we both know how little the president 's spouse influences them , do n't act like this will be Bill Clinton 's third term. And even if they did have some influence , I 'd rather the influence be coming from someone like Bill Clinton than Vladimir OOV But it does n't matter , this argument is OOV You 've made up your mind and even after Donald Trump has shown himself to be a lying , racist , OOV , sexual predator , you will still vote for him because you 're afraid of the world and Donald Trump has made you believe that the only way you 'll be safe again is if you elect him president .

(OOV\_comment\_begin) Lol you criticize Trump for being a liar ? ? ? Hahaha please watch this video [ ( click here ) ] ( https : OOV ) she lies to people ls faces all the time. Oh and OOV racist ? Yeah illegal immigration is a crime sooo it 's racist to be against illegal immigration ? ? ? Also Trump 's accusations of being a sexual predator have not been proven so he 's innocent until proven guilty .

## 366\_ah\_t1\_d0k8owh.json (ah-ah)

(OOV\_comment\_begin) Final Ruling : View unchanged .

(OOV\_comment\_begin) So you 're just whiny and think you 're a OOV OOV much ? It 's not bigoted because you suffer pretty much no consequences and social OOV You 're not being victimized nor are you being discriminated OOV It 's not bigoted behavior. OOV Besides , you have a fucking gun , you ca n't be a victim of anything when you have a OOV If you keep saying that everything is irrelevant , then just stop it and shut down the thread because you do n't want your view

changed , you just to act like a whiny OOV Owing a gun is not the same as belonging to a religion or being a OOV It 's OOV “ I 'm so repressed because I own guns ! ” That 's you .  
(OOV\_comment\_begin) OOV OOV We are going to have to agree to OOV This will be my final reply to you .

### 319\_ah\_t1\_d4hfgfb.json (ah-ah)

(OOV\_comment\_begin) Because the militia clause could be interpreted to mean it only applies to U.S. citizens who are in a OOV I understand and respect the argument that says citizens can bear arms regardless of their inclusion in a militia , however , I believe that the argument that says citizens can only bear arms if they 're involved in a militia is also valid .  
(OOV\_comment\_begin) How is it a valid interpretation ? We all speak the same language , right ? The text very OOV says “ the OOV of OOV OOV to keep and bear arms OOV not be OOV ” There is absolutely nothing ambiguous about that. There is nothing to be OOV You are falling victim to a narrative that is trying to have you ignore your education in the English language so that OOV do n't have to do the awfully hard work of getting an amendment ratified .  
(OOV\_comment\_begin) You 're literally just quoting half of the amendment and then insisting the language is n't OOV OOV I do n't understand the English language is n't a winning argument .

### 492\_ah\_t1\_crvt7qc.json (ah-ah)

(OOV\_comment\_begin) You 're citing the Heartland OOV That institute is probably the most well-known merchant of OOV and misinformation about global OOV Everyone knows they are completely full of OOV This is the same institute that worked with Philip Morris to throw doubt over the link between cancer and smoking .  
(OOV\_comment\_begin) OOV They 're republishing an article that already appeared in the WSJ , which is behind a paywall , not that it matters , the information is verifiable OOV It 's all neatly in one place .  
(OOV\_comment\_begin) You linked to a conservative news outlet , the Wall Street Journal , to an editorial opinion piece written by the president of the Heartland Institute , Joseph OOV The WSJ might be the idiots that first published it , but you 're still citing the Heartland Institute - they are the ones who wrote it. Incidentally , the author of that piece - Joe OOV - does not have any formal qualifications , and is a known contrarian who turns his back on scientific studies and instead makes his own assertions such as A modest amount of global warming , should it occur , would be beneficial to the natural world and to human civilization and The IPCC and all the mainstream media and environmental extremists who cite it uncritically really have become a joke in the scientific community. His love of misinformation and fake science came well before his current climate change activism - in the 90s he actively denied the health risks of OOV He 's just a crackpot and his writing should be given little more attention than the OOV ravings of a OOV - - In response to your [ removed ] comment , I 've pasted my response below : The reason to highlight the credibility of the authors is to show that they are incredibly biased , and that they are unqualified to pass expert judgement on the subject. Since you insist that the facts are true , let 's take a moment to prove you completely incorrect : First , a look at the authors : OOV OOV - qualifications : OOV Affiliations : President of Heartland OOV Credibility : OOV Supporting quotation : ” As a threshold matter , this Court finds that Mr. OOV is not a credible witness and that he did not offer reliable opinions in this matter. While Mr. OOV described himself as an economist , he holds neither undergraduate nor graduate degrees in economics , and the highest level of education he completed was high school. ” - Travis County Texas court ruling , Aug 2014 OOV OOV is a PhD researcher , again from the Heartland Institute , who believes that “ the theory of creation actually had a much better scientific basis than the theory of evolution ” . He is on record as saying “ I view my job a little like a legislator , supported by the taxpayer , to protect the interests of the taxpayer and to minimize the role of government. ” - this is a clear conflict of interest and shows he is not an objective OOV The paper that he famously published in the geography journal “ Remote Sensing ” was proven so conclusively to be false that the reviewing editor-in-chief stepped down , stating “ With this step I would also like to personally protest

against how the authors and like-minded climate sceptics have much exaggerated the paper's conclusions in public OOV" –  
 - To the article : OOV This is OOV The 97 % figure comes from a robust study by Cook et al ( 2013 ) ( it 's been made open access - view the study [ here ] ( http : OOV ) ) . The " handful " of studies is a body of approximately OOV studies which explicitly state a position on AGW , of which OOV supported AGW and approximately 83 actively did not support OOV  
 That 's where the 97 % figure comes from. OOV This attack on the OOV study is comically OOV The authors ca n't actually dispute the findings of the study , so instead they just make up some arbitrary OOV argument : " it did n't use the word dangerous " and " it leaves out all these " prominent " OOV ( btw : their credentials are available here : [ OOV ] ( http : OOV ) , [ Christy ] ( http : OOV ) , [ OOV ] ( http : OOV ) , [ Michaels ] ( http : OOV ) - note that all of them are OOV and widely discredited ) . Additionally , with regard to the " Nature " article about abstracts : the effect shown in the Nature study could easily be applied to the OOV study and the figures would remain the same : the " abstract effect " cuts both ways - so the " pro " and " anti " abstracts would be affected approximately equally , leaving the same overall result. OOV [ The study in question ] ( http : OOV ) . The above analysis from the authors is simply deceitful , as any clear reading of the source study would show that , while there were indeed 79 respondents who worked specifically in climate change , 90 % of the OOV respondents agreed that temperatures have risen , and 82 % agreed that it was OOV The 97 % figure in this study simply comes from the proportion of those with specialist knowledge who agreed with the two questions. It almost beggars belief that the authors attempt to " debunk " this relatively straightforward piece of good science. And here is where I will OOV The above discussion already clearly shows that there are serious and fundamental flaws with the linked OOV I honestly ca n't be bothered to put any more work into showing you the combination of lies , deception , misinformation , OOV and logical fallacy which are woven into every single paragraph of this pile of OOV The article is trash , and honestly , if this is the best " source " you can produce to support your claim , and you decide to continue to stand by it , then you should probably question your own scientific OOV Goodbye .

#### 688\_ah\_t1\_dg5pmfd.json (ah-ah)

(OOV\_comment\_begin) OOV That article rather hilariously makes my point for me. The last concrete accomplishments of feminism were all in the early 90s ( back when I was still proud to be a feminist ) , and the closer you get to OOV , the more vague and questionable the accomplishments OOV The only accomplishments they mention from the last decade are " They pushed pop culture icons to join the fight. " and " They got Obama OOV " Oh , and I guess " They used online feminism to give the marginalized a voice. " which is , at best , a double-edged OOV OOV Okay , sorry , I did n't realize you were going to pretend that feminism is a backwater like Nigeria is the same as feminism in the OOV I meant places like Feministing , Huffington Post , the Guardian , the Mary Sue , Jezebel , etc. Places where western feminists discuss western OOV I should have been prepared for a white western middle-class feminist to wrap herself in the cloak of third-world OOV That is a pretty common tactic you folks use , my bad .

(OOV\_comment\_begin) Yup , as expected you moved the goalposts right away. These changes take time and are best appreciated in OOV And the Nigerian quote is quite applicable in many regions in US where women are treated a lot differently to downtown OOV Of course you are desperately choosing the adjectives that support your view , not challenge it .

(OOV\_comment\_begin) OOV I did n't move the goalposts , so much as you jumped to a different arena OOV See , you and I just mean different things by " modern OOV " When people in the west ( i.e. people on reddit ) talk about modern feminism , they mean feminism OOV their own OOV , not in some foreign country that we have almost zero cultural exchange with. It 's like if I said " modern movies are mostly shot on digital cameras " and you said " OOV uh , in Nigeria most movies are shot on VHS camcorders ! " Which is true , but OOV And you know that , because people call out feminists on this bullshit

OOV the OOV , but you all conveniently forget from one conversation to another. OOV In retrospect OOV feminists will be remember as the generation that held women back by clinging to outdated victim narratives and fighting against actual equality because they have zero actual faith in the equality of women. OOV I ca n't tell if you 're being intentionally racist or you just do n't see how racist what you just said OOV Probably the latter .

#### 1077\_ah\_t1\_dhkbwrw.json (ah-ah)

(OOV\_comment\_begin) Are there no other words you know of that could be used to denote the same idea ? Why is it so terrible to request using a different word due to the current and historical social context ?

(OOV\_comment\_begin) Because censorship among adults is pretty fucking OOV If I want to make my point in the most crass , shocking way , that is my god damned right. If I want to characterize someone else as a OOV , idiot with a OOV

screen , you get to decide whether my tone and language added to or detracted from my point. Moderators should use a light touch and let the public decide through upvotes and downvotes whether a post adds to the discussion .

(OOV\_comment\_begin) OOV And it 's everyone else 's “ god damned right ” to tell you off and ignore your point due to the way you presented it. Or to simply tell you that you 're not welcome in their space due to your choice of language. OOV Does n't the level of activity on a given sub serve that purpose ? If people object to that level of moderation , then they will stop using the OOV If people keep using the sub then the public has decided that that kind of moderation improves OOV Essentially , your right to say what you want does n't trump their right to moderate the tone of their space. OOV Refusing to interact with someone because they choose to utilize particular offensive language is n't OOV It 's just choosing who you want to associate with .

### 727\_ah\_t1\_d2ptbtr.json (ah-ah)

(OOV\_comment\_begin) OOV Really what is so great about suspending OOV OOV , and attacking your own nation ? Lincoln was a OOV OOV The original civil rights act was written by the Republicans in OOV Even 7 years later more republicans voted for it than against it. Only 6 republican senators and 34 representatives voted against it ( compared to 21 democrat senators and 96 democrat representatives ) . Sorry but your strawman easily falls apart if you look at the historical facts.

OOV No they OOV It was more of a suburban strategy. OOV OOV has been around since the 1830s , to blame it on the “ southern strategy ” points to a real lack of historical OOV OOV That explains everything !

(OOV\_comment\_begin) For somebody who claims to put love of historical facts the fact that you call fighting the biggest case of domestic terrorism America has ever seen really shows how warped your view of history is. The civil rights act was mostly passed regionally as the southern strategy was the result of the countries regional voting patterns so also is irrelevant .

(OOV\_comment\_begin) OOV LOL OOV , and the revolution in 1776 was terrorism too ? You OOV are OOV OOV ” It is n't so much that they are OOV It 's just that they know so many things that are n't so. ” -- Ronald Reagan .

### 507\_ah\_t1\_d34l3zp.json (ah-ah)

(OOV\_comment\_begin) That 's a subjective judgement that you are presenting as an absolute objective truth .

(OOV\_comment\_begin) True , but your only arguments against it are pedantic in nature , nitpicking at my definitions and semantics rather than presenting an intelligent alternative of your own .

(OOV\_comment\_begin) I 'm not making an argument , I 'm calling you out on making an insulting bad faith argument that generalized gun owners who do n't share your opinion as non rational and unintelligent .

### 888\_ah\_t1\_de2en4h.json (ah-ah)

(OOV\_comment\_begin) You want the politician to decide that the parent ca n't make the decision , and that a doctor ca n't make it with them. Children are n't granted the right to body self OOV Even get sent to your room ? Yes , they are both genital OOV I 've not argued against that even when you put things in bold OOV I think there are different reasons to regulate one legislatively and not the other. I 've articulated those reasons elsewhere in this OOV I do n't need to demonstrate medical benefit. You need to demonstrate that doctors and parents are n't capable of making the determination of medical benefit such that politicians need to step in. If you think that parental decisions do n't have a permanent affect , then ... we OOV ” let other people invade my human rights ? ” What ? We do n't grant bodily autonomy to children - you 're inventing that right to serve this position. A parent can override their child on pretty much every aspect of this .

(OOV\_comment\_begin) Are you serious ? I got 4 words into your reply before knowing you have n't read what I 've OOV Yup your first , second , fourth , fifth and sixth paragraphs have all been addressed in my OOV I 'm glad you 're at least coherent on your third OOV I wo n't bother to OOV anything because it 's already all there. It 's a shame really , I can tell you have OOV intelligence but your refusal to simply read and consider what other people write is OOV You will never improve yourself if you continue to read only what you want to read .

(OOV\_comment\_begin) thinking what you said is wrong and misinformed is n't quite the same as not reading. Each of my paragraphs responds to one of your points. You've fabricated a right of bodily autonomy in children that is n't recognized generally in law ( or in parenting in any culture ) and used it foundational , you've used an OOV argument around OOV despite me having stated several times I do n't see that equivalency ( and you fail to address that they should be equivalent ) , you repeat the “ demonstrate medical benefit ” where I've been clear twice this does n't resonate my perspective and you've made some OOV argument about human rights. If you ca n't keep it civil I wo n't respond .

#### 402\_ah\_t1\_cks66gx.json (ah-ah)

(OOV\_comment\_begin) Christians commit to genocide Africa with reasonable frequency , sometimes in the name OOV No one in the US gives a fuck and the world does not expect Christians to actively protest it .

(OOV\_comment\_begin) OOV No , they do n't .

(OOV\_comment\_begin) Joseph Kony and the Lord 's Resistance OOV The Justice and Equality Movement in OOV OOV http : OOV The fact that you OOV heard about this further validates my point .

#### 116\_ah\_t1\_cp4rg51.json (ah-ah)

(OOV\_comment\_begin) OOV I'm sure a person with large burn scars is also going to be perfectly healthy - does n't mean they ca n't go for the OOV I'm pretty sure the pregnancy will have a larger effect on the woman 's life than a burn scar OOV OOV This shows that our OOV is just fine - it says nothing about individuals , or even overall health. By the same logic I could demonstrate that any illness is “ going to go just fine ” . Our population and evolutionary history is irrelevant to an individual 's health. OOV You're absolutely right that the logic is flawed , but you're mistaken over whose logic it is. Like I said earlier , you're drawn attention to the problem with placing a current value on a future event. Things in the future hold no actual value until they are in the present. I have my dog now , so it 's unreasonable for you to take it away and claim it was “ as good as lost ” anyway. The OOV is not a person now , so you ca n't say it 's “ as good as born ” now. OOV So you're saying that nothing can be “ left alone ” and continue to OOV If that 's the case , how can you use that as a distinction between a future person and a OOV ?

(OOV\_comment\_begin) OOV Aside from that ludicrous assertion , you're missing the point that there is nothing wrong with someone 's health when they are OOV OOV A OOV is in the present. Why does a living human have value ? Because it has a future to experience. Same goes for a OOV OOV I'm saying the need for nourishment has no bearing on your right to life .

(OOV\_comment\_begin) OOV There 's nothing wrong with someone 's health when they're bound to a chair against their will. There 's nothing wrong with someone 's health when they're stolen from. And yet , we still offer people the opportunities to deal with these circumstances. You're acting like this is n't a OOV altering OOV If anything , it 's more serious than my OOV You're acting like there is literally nothing wrong with being pregnant , which is patently OOV Under what circumstances do you think someone should be allowed to seek medical attention ? You seem to think it 's something reserved for only people in certain OOV OOV An ovum is in the present. Why does a living human have value ? Because it has a future to experience. Same goes for an OOV You need to meaningfully distinguish between future people that are ok to prevent and future humans are are not ok to OOV Also , judging a being 's value on its future seems to suggest that the deathbed murder I mentioned earlier would be OOV OOV But the need for other factors do count ? The fact is , every potential future person needs something in the present to ensure they are a person in the future. I need food to live , a OOV needs a womb , an ovum needs a sperm , a person trapped in a burning building needs a fireman , some people need organ transplants , etc. There 's still no meaningful distinction here .

#### 197\_ah\_t1\_cxs98gy.json (ah-ah)

(OOV\_comment\_begin) That was a discussion that went no where fast. Maybe go back to your philosophy 101 class and let other people stick to the subject at hand .

(OOV\_comment\_begin) Because your childish attempt at condescending was much more on-topic than what I was posting .

(OOV\_comment\_begin) Ah , the tu OOV You seem very smart .



### 1088\_ah\_t1\_dguc70f.json (ah-ah)

(OOV\_comment\_begin) other than , you know , an entire section of the military devoted to that region .

(OOV\_comment\_begin) stalking me now ? that 's pretty sad OOV get a hobby

(OOV\_comment\_begin) OOV Get a clue ( or better yet , an OOV ) you 're OOV so far .

### 1166\_ah\_t1\_dcgna7.json (ah-ah)

(OOV\_comment\_begin) You 're very aggressive and I do n't enjoy debating with people who come across with such a condescending , dismissive , and arrogant OOV Feel free to read through my responses to other commenters to see some answers to your questions .

(OOV\_comment\_begin) How am I aggressive ? You ca n't stay OOV in your own view , that is YOUR problem. First you start the thread with saying " their worldview is inferior to liberalism when it comes to improving the world. " You make a giant claim , saying that conservatism is inferior to OOV Then you try to shove it away with your comment to me , saying : " " Conservatives never refer to the notion of " Quality of Life " That is two very different things. If you mean something else than what you wrote in your OP then make a new post .

(OOV\_comment\_begin) If you ca n't understand how you 're aggressive , that is your problem. I 'm done interacting with you .

### 1087\_ah\_t1\_d6kd6sy.json (ah-ah)

(OOV\_comment\_begin) OOV For certain people no matter what the answer is always the same. Female rape victims are n't taken seriously : OOV Make rape victims are n't taken seriously : OOV Same for other OOV If we treat female murderers or abusers OOV when they target men that is sexism against women. If we did the same for men who target women that 's also OOV The answer is always the same .

(OOV\_comment\_begin) OOV because misogyny is a root cause of pretty much every injustice when it comes to gender , even when that injustice negatively effects men. of course the answer is always the same. the problem has been the same for thousands of years. How on earth is " its always the same " any kind of argument or OOV OOV denying " the cause is OOV " is n't almost always the answer. That doesnt make it less true

(OOV\_comment\_begin) OOV OOV You realize this is the logic of a fundamentalist ? What 's causing school shootings ? Lack of religion. What 's causing drug abuse ? Lack of religion. What 's causing global warming ? OOV CO2 emissions ... . Kidding , not enough OOV If no matter what the answer just always be the same that is a belief , not a verifiable theory .

### 731\_ah\_t1\_d9w67nx.json (ah-ah)

(OOV\_comment\_begin) This is the division I am talking about. Like it or not , but 59 million people voted for him and you are going to have to live in the same country as them. It might help if you do n't insult them. It will probably just make them more mad and more likely to OOV Trump .

(OOV\_comment\_begin) Fuck them. OOV ca n't be made to feel comfortable for one second. History tells us this already .

(OOV\_comment\_begin) Well it seems that you are the one who ca n't be made to feel comfortable .

### 861\_ah\_t1\_dn8gow1.json (ah-ah)

(OOV\_comment\_begin) OOV https : OOV They do n't explicitly say " shoot Trump protesters " but they damn well imply it .

(OOV\_comment\_begin) yeah , you 're delusional if you think that ad implied shooting trump protesters .  
(OOV\_comment\_begin) What does the word imply mean to you ?

#### 951\_ah\_t1\_cm5fzjj.json (ah-ah)

(OOV\_comment\_begin) Why did you make the revision ? What were you trying to show ?  
(OOV\_comment\_begin) The futility of the OOV test  
(OOV\_comment\_begin) How is that futile ?

#### 746\_ah\_t1\_cw1gso3.json (ah-ah)

(OOV\_comment\_begin) Drugs are just extremely pricey there . Source is an Australian friend that does coke once in awhile . So maybe he gets ripped off . But most things in Australia are expensive .  
(OOV\_comment\_begin) You said it was hard to get illegal stuff there. Cocaine is expensive in America too .  
(OOV\_comment\_begin) Well according to this Australia coke is 300 \$ a gram and America is 8 \$ up to 300 \$ . So what I 'm getting at is the price of OOV guns in Australia does n't mean much as its an island and OOV product has a hard time getting there. America u can throw shit over the border from Mexico http : OOV

#### 796\_ah\_t1\_dcuwvw5.json (ah-ah)

(OOV\_comment\_begin) Explain how punching a nazi because you think they are dangerous is any different then punching a Muslim because you think they are dangerous .  
(OOV\_comment\_begin) Nazis are OOV an OOV group. They are founded on the idea that OOV should be OOV , OOV master OOV , etc. there are OOV OOV OOV , it 's OOV There are millions of OOV OOV If you want to compare Islamic extremists , that would be a fair point. But comparing everyday muslims to OOV is insane .  
(OOV\_comment\_begin) First of all , there were certainly non violent OOV The inventor of the rocket was a nazi , but was n't charged with war OOV Secondly , killing Jews is not a tenant of national OOV Thirdly , that is your perception of OOV and OOV What if someone else perceived all Muslims as violent ? Yes , it 's not true , but neither is your belief that all OOV are OOV Why is it ok for you to act on your ignorant beliefs but others can not ?

#### 1047\_ah\_t1\_czmxg5e.json (ah-ah)

(OOV\_comment\_begin) What , because of right to work laws ? Free trade ? What are you talking about specifically ? 1. Right to work : makes complete sense from an economic and legal OOV There is no reason that a third party ( the union ) should be able to block a contract between an employer and OOV 2. Free trade : auto unions got destroyed because they bid up their wages so high that they could n't compete with Japan. OOV As a consumer , I get cheaper and better cars now .  
(OOV\_comment\_begin) OOV , no , earlier than that. In the early 20th century there were hired goons who beat up workers exercising their right to assemble and OOV OOV But I 'll bet you bitch about taxes. And ca n't make the OOV OOV And it would n't be necessary if manipulated white men were n't so eager to work against their own best interests .  
(OOV\_comment\_begin) OOV You can say " capitalists " did that , but you 're talking about business. Philosophical capitalists do n't support that kind of behavior. OOV OOV You 're right , I OOV Do enlighten me. OOV I 'm glad that you 're here to tell people what 's in their best interest. Oh , excuse me. Not just tell them , but to legally mandate them to do what 's " in their best interest , " according to the left. I 'm sure they 're very happy to have OOV looking out for them .

#### 1055\_ah\_t1\_d51p7aj.json (ah-ah)

(OOV\_comment\_begin) OOV that I could fake incredibly easily ? That 's not evidence of anything. Treat my anecdote for what it is .  
(OOV\_comment\_begin) Ok so nothing more " proving " than a fairy tale  
(OOV\_comment\_begin) If that 's how you want to take my testimony , fine. You can assume I 'm lying and I 'm not OOV about it. Keep trying to pretend the OOV crowd does n't use threats and OOV You 're on video at DePaul and many other places .

### 910\_ah\_t1\_cjiqwj3.json (ah-ah)

(OOV\_comment\_begin) How are you measuring intelligence ? Does OOV ? I will admit that there are problems with grade scandals in sports and it should be more strictly OOV OOV Because of physics are also a part of it. I did. Look at the previous post on techniques , player tendencies , formations , and OOV There are many more examples I could give you if you like. We do not force cities to build stadiums to my knowledge. They build stadiums to increase tourism which helps the whole city. Also it isnt only the player that enriches their mind by playing the OOV The spectator can also enrich their mind by learning the intricacies of the sport .

(OOV\_comment\_begin) OOV IQ highly correlates with general OOV OOV In fact , size is overwhelming the deciding OOV That is why weight divisions exist. A heavyweight knocking out a welterweight is not the result of “ chess ” . OOV Ha ! What happens is that cities decide they want a stadium and pass the cost on to the citizens. If a private business wants to build a stadium , they can pay for it themselves. OOV Have you ever been to a sports bar or sporting event and seen the fans ? These people certainly do not behave as if they are enriching their OOV Just admit that you like sports and want to defend your OOV You claim it is about “ enlightenment ” but have failed to demonstrate this. Following sports is no better than following celebrity gossip .

(OOV\_comment\_begin) Im good , Thanks though. We can agree to OOV I personally have benefited and my life has been enriched by OOV I also believe that I have defended my point adequately .

### 579\_ah\_t1\_dildg66.json (ah-ah)

(OOV\_comment\_begin) A bit about me , I 'm 21 , have a bachelor 's degree , and this fall I will begin a masters degree program at my dream school. I have \$ 0 in student loan debt and have spent only \$ 5,800 ( roughly ) on my college education thus far. I have paid this entire amount myself with no financial assistance from my parents and no need or demographic based financial OOV Most of my school was paid for by merit based academic OOV I covered the rest but took steps to lower the cost whenever possible ( I went to Community College my freshman year , went to a cheap local school after that , took 18 or 21 hour semesters every semester , and received my bachelors in just 2 1/2 years , counting my year at CC ) . I worked 32 hours a week while in school , and have been working full time since my graduation in OOV I will take on no debt in getting my masters , even though it 's at an expensive out of state school , because I received an OOV with a full tuition stipend thanks to my OOV undergrad GPA and years of work experience. After I graduate , I have already lined up a job with the professional firm I interned with starting at OOV This is not unusual , since I chose a major and profession with a 97 % employment rate. Because of the hard work and sacrifices I made to get where I am , it pisses me off when I hear people my age whining about their student loans and inability to find a job. I feel that I was n't the one who decided to go to a fancy private school or major in sociology , while they did , and therefore they deserve zero sympathy and ESPECIALLY do not deserve “ free ” college or student loan forgiveness paid for by my tax OOV So there you have it Reddit , change my view !

(OOV\_comment\_begin) You 're a statistical OOV As such the majority constitutes a hidden systemic issue that can not merely be attributed to personal OOV There are a multitude of systemic issues that contribute to negative educational OOV For instance , I racked up debt but was simultaneously dealing with my mental OOV There are dozens of other systemic reasons that affect individual outcomes .

(OOV\_comment\_begin) That 's an excuse for one OOV After that you chose to continue to incur debt , knowing full well you had a mental illness that could make completing your education with a OOV resume difficult .

### 165\_ah\_t1\_cwlyywd.json (ah-ah)

(OOV\_comment\_begin) No it 's not , the opposite is the case , feminists going back as far as OOV have agreed that sexism is a cultural attitude that infects the thoughts , perceptions , and actions of everyone exposed to it , not just men. A woman is just as able to believe all women belong in the kitchen as a man is , for example. There 's no unique circuit in the female brain that prevents her from OOV and perpetuating sexist OOV The idea that men would be uniquely capable of perpetuating sexism is wholly a OOV If any idea would be radical in feminist circles , it 's that one , because it 'd require a massive rejection of an entire century of feminist



theory .

(OOV\_comment\_begin) OOV Are you talking about Sartre 's wife ? If so , you misspelled her name. OOV

That may very well be , but feminists are now trying to claim that any woman who disagrees with their angry agenda has OOV OOV As much as feminists proclaim to be “ OOV , independent women ” - their agenda is to deny women the right to be OOV OOV OOV take their OOV ' about as seriously as the rest of us. Which is why you now hear them echoing the belief that transsexuals are born with the brains of the opposite sex , whereas their previous belief was that gender is a “ social construct ” . You ca n't hold both beliefs at the same time .

(OOV\_comment\_begin) OOV Does n't change my point from being 100 % OOV The idea that misogyny can only be attributed to men is silly and stupid and goes against the entire history of OOV [ The OOV are an easy example ] ( https : OOV ) . They campaigned against the women 's right to vote using exactly the same arguments that like-minded men did : that women were incapable , overly emotional , and too dependent on their husbands to positively affect democracy. Unsurprisingly , most of these women were also deeply conservative , claiming suffrage was part of a communist conspiracy to overthrow American values , very similarly to the way modern OOV are always going on and on about OOV JUSTICE OOV and OOV OOV OOV , etc. History repeats itself all too OOV They had absolutely , 100 % , internalized the misogyny against them , that 's undeniable given their rhetoric , and were repeating it back against other OOV That 's the definition of OOV misogyny : believing the stereotypes against you as truth and repeating them back angrily at others. OOV Nah , not OOV That 's an exaggeration in the extreme and a huge blanket statement on top of that. Just fiery rhetoric as is the fashion for OOV today , who are 100 % more angry than any feminist I 've OOV OOV No it 's not , that 's silly and misinformed , clearly contradicted by both theory and history. OOV You quite clearly have no idea what feminist theory is , so I do n't think you 're at all qualified to judge who is taking it seriously or not. You sound very much like someone who 's gotten their impression of feminism from internet OOV groups ( OOV 's , OOV , OOV , OOV , etc ) because everything you 've said so far is right out of their OOV OOV I 'd suggest reading some [ OOV ] ( http : OOV ) or [ hooks ] ( http : OOV ? OOV & OOV & OOV & OOV ) or [ OOV ] ( http : OOV ? OOV & OOV & OOV & OOV ) or [ Woolf ] ( http : OOV ? OOV & OOV & OOV & OOV ) , any primary source really , before you touch on the subject again , if only so you can be taken seriously by people outside the OOV OOV OOV Sure you can , all you have to do is discard your assumption that biological and environmental influences always operate as mutually OOV The assignment of behaviors and cultural effects to gender is almost entirely OOV That is , women in some cultures do X and men do Y , while in other cultures it 's reversed or involves entirely different symbols Z and OOV The particulars are a social construct , but our brains could very well bias which we find ourselves identifying with. It may even be conceivable that a person might identify with a different gender depending on which culture they 're born OOV It 's also conceivable that gender identification is n't a direct result of immediate brain OOV but of its emergent chemical or even OOV activity , which can change over time and thus might allow a scientific explanation for gender fluidity .

## 72\_ah\_t1\_ct15lzz.json (ah-ah)

(OOV\_comment\_begin) If the real number of upvotes were OOV the 18k displayed ( 1.8 million ) , it would still be a very small minority of actual OOV Do some basic math .

(OOV\_comment\_begin) It is basic OOV I 'm not counting people who might have OOV I 'm counting people who OOV vote. So : OOV upvotes - 10k downvotes = 18k OOV My point is from those who voted the majority OOV There is no way to know what the OOV think so why OOV I 'm look at what we \*can\* measure .

(OOV\_comment\_begin) The claim that the majority of users feel a certain way is not supported by this evidence. There really is n't anything else to discuss .

### 699\_ah\_t1\_cwd5rc2.json (ah-ah)

(OOV\_comment\_begin) OOV Yeah it is. It 's textbook misrepresentation of someone 's position. The original poster claimed " the color of your skin is a large factor in hiring " . And you replied by saying " you 're wrong because there are other factors that influence hiring " . Your reply does not disprove the original OOV The original poster never claimed that race was the only factor to influence hiring .

(OOV\_comment\_begin) OOV OOV OOV Can you quote me where I said that ? That 's a textbook misrepresentation of what I literally said .

(OOV\_comment\_begin) You said OOV But no one was making the claim that " people with black names are less OOV than those without " in the sense that you are OOV No one is saying " every person with a black sounding name is less OOV than every person without " . Therefore , it is irrelevant to state that some people with black sounding names are more OOV than some people without such names , since no one disagrees with that. All you have shown is that there are other significant factors with regard to hiring , but this is OOV Then you reply with the height analogy : OOV But your response here is flawed because no one ever said height was the " deciding " factor for success. The point is that its a significant OOV Then you follow up with stuff like " Overall , there are more unemployed white people. " which really is not relevant .

### 714\_ah\_t1\_codklzb.json (ah-ah)

(OOV\_comment\_begin) I never said to use unproven therapy .

(OOV\_comment\_begin) Look , are you being intentionally obtuse ? There are known OOV conditions for which there are no known OOV Your position is to provide forced therapies for all criminals " until something works. " When there are no proven effective therapies , the only thing left are unproven OOV If you wish to force patients to engage in unproven therapies , you are violating APA ethics which require voluntary informed consent for unproven OOV You ca n't simply OOV this away. Either you wish to force therapy on everyone , even when there is no actual therapy that is known to work , or you don't. If you do n't , then you are agreeing your original position is OOV If you do , then you are asking professionals to violate their OOV There 's no third option here .

(OOV\_comment\_begin) Keep trying is the third option .

### 722\_ah\_t1\_dbmbal4.json (ah-ah)

(OOV\_comment\_begin) I think you 're incorrect , I 've listed a few reddit specific reasons for why this is the case .

(OOV\_comment\_begin) I 'm responding to your first and fourth point. You say that the low stakes provided by anonymity cause people to be more dishonest than OOV I 'm saying that does n't make sense OOV Why would people be more dishonest at lower stakes ? To admit you 're wrong in real life requires that you physically communicate this to someone who you will likely interact with in the future who will remember this " OOV " On reddit you can save face .

(OOV\_comment\_begin) My gripes are still with reddit , no matter what aspects of my view you decide to not engage with. Point 4 is about " small concessions " that happen over the course of the debate , not admitting that you were wrong flat out. People admit that they are " small wrong " all the time in debates without conceding the larger point. In the real world this follows you because you have a face , and the people you are arguing with are probably important to you in ways that strangers on the internet OOV Arguing in the real world is linked to your social identity , arguing on reddit is solitary .

### 3\_ah\_t1\_cqxdw1j.json (ah-ah)

(OOV\_comment\_begin) why. has every fat person on earth wronged you personally by their existence ?

(OOV\_comment\_begin) YES ! They eat more food , they consume more oxygen and they contribute far less to the OOV They are , on average , less intelligent and for those of us who live in countries with OOV medicine , they are a burden on our healthcare systems. Fat people wrong humanity .

(OOV\_comment\_begin) OOV we already waste 1/3 of the world 's food production , so it 's pretty damned clear that this is n't an issue. OOV what does this even mean ? are you worried we will run out of air ! ? OOV this is entirely subjective and makes no sense. OOV OOV is fat and he invented OOV OOV again , this is literally subjective and not true. they have the exact same intelligence as any other human being on the face of planet earth. OOV so are mentally ill people , disabled people and chronically ill people in the sense that they require even miniscule amounts of extra OOV this is an issue of capitalism , not fat people .

### 1185\_ah\_t1\_dg9xang.json (ah-ah)

(OOV\_comment\_begin) OOV we saw one of the lowest voting participation in ages and he still lost the popular vote , i would n't call that OOV OOV he run against a shitty competition and cashed in on the lack of excitement on the democrats side. OOV liberals still OOV outnumber conservatives , and even with the system rigged in favor for the GOP 2 of the last 4 presidents were democrats .

(OOV\_comment\_begin) Trump 's turnout was the biggest for a conservative candidate since OOV Stop whining about Hillary - Trump won because America voted for him. She won the " popular " vote because California and NY are full of liberals - but he won a vast majority of the OOV OOV EVERYTHING IS OOV ! OOV on tinfoil OOV

(OOV\_comment\_begin) OOV you made that up. ( or somebody else did and you did n't bother to check ) OOV the only reason that the GOP is still a political force in this nation is that rural votes count more then urban ones. in a true democracy they would be dead in the water long ago , and even as it is , their days are OOV the democrats numerical superiority increases each year , with no signs of slowing down .

### 379\_ah\_t1\_dmylxxg.json (ah-ah)

(OOV\_comment\_begin) This is n't about " good sex " , and it 's not about " attractiveness , " this is about OOV Some people who know they 're in a situation where they 're having sex against their will , have even consciously OOV to enjoy the physical sensations instead of resisting what 's a lost battle that will only leave them more physically OOV That does n't make it " not rape " . I do n't think it 's about only OOV Sex is far more than OOV And surgically altering them does n't make them into something they 're not - they 're still what they are , just surgically OOV , no matter what they look like , and no matter how people choose to think of them. The actual sex does n't change. Some people OOV care about the actual sex of their partners , but those people are rare as far as I know , and presenting oneself as

(OOV\_comment\_begin) If the preference is YOUR preference , it needs to be YOUR disclosure , otherwise it ; s YOUR OOV if you date someone you do n't want to date because you kept your OOV to yourself. They 're not deceiving OOV They 're presenting themselves to the world as themselves. You 're the one who would feel deceived by them being themselves without telling you about their medical history - so you 're the one who needs to out yourself. Not the person you 're interested in. it 's YOUR interest and it 's YOUR OOV , but its somehow OUR responsibility to help you find compatible dates ? Talk about privilege .

(OOV\_comment\_begin) This preference is almost OOV Thinking someone is " privileged " does n't give anyone the right to rape them. If " OOV " literally means " I do n't want to sleep with someone who thinks they 're trans " , then it is a normal stance and not a civil rights issue. Everyone would be OOV , even most trans people. It 's not just " medical history " , it 's a fundamental part of human sexuality .

### 961\_ah\_t1\_d8tasj0.json (ah-ah)

(OOV\_comment\_begin) OOV It was just an example. Do puppies not fight over their mother's tits ? OOV The most stereotypical form of bullying is taking a kid's lunch money. OOV Source ? I've watched mother dogs just roll over and let her pups have at her tits , she does n't care. Hell , even my mother never got angry when I took all the candy etc ... she 'd say share with your siblings but it was n't very OOV More of a rational idea , not OOV OOV What are crows ? Actually , the heart would go to the OOV But yes , the social leaders do get first OOV Now what would happen if a kid tried to jump to the front of the line , would he not be bullied until he took his place at the back ?

(OOV\_comment\_begin) OOV Where the hell did you study anthropology , OOV OOV ?

(OOV\_comment\_begin) Have you ever hunted deer ?

### 565\_ah\_t1\_cylpujj.json (ah-ah)

(OOV\_comment\_begin) OOV Why ? That 's not the standard set in Roe v. Wade , nor is it a widely accepted criterion in arguing that abortion is wrong. OOV But yeah , we can totally see fetuses learn over time. Its actually very well documented , you can look at your OOV own OOV to see proof of this. OOV Yeah , that 's definitely not true. Wikipedia article on [ OOV prognosis ] ( https : OOV # OOV ) gives a good OOV If a patient has a high chance of recovery , society still considers that patient a person. If the patient becomes brain dead , there are those who argue the patient is no longer a person anyway. This implies that the personhood of the coma patient rests on their OOV OOV to have full OOV The same can be said of a OOV Both the coma patient and a fetus are human ; neither have consciousness .

(OOV\_comment\_begin) Yeah , i agree , if a person in a coma becomes brain dead they are no longer a person and are just like a fetus at that point. And normally people pull the life support on brain dead people because they realize they will have no quality to life anymore and cant comprehend their OOV Kinda like how a teenage pregnancy being aborted can lead to a better quality of life for the teenager and her family , and allow the child to be reborn another day when it is wanted and well cared for. So , its good to know you would rather destroy multiple lives than abort something with no sense of consciousness or OOV You sure are a caring person. Destroying multiple lives because of a religious bias .

(OOV\_comment\_begin) OOV People who are diagnosed as brain dead have an OOV loss of human OOV The exact opposite is true in the case of a developing human being in the OOV There is no analogy to be made between fetuses and people who are brain dead in the abortion debate. OOV A child who is aborted will never be " reborn " . It 's dead. OOV You or I were killed as a toddler we would n't be here on OOV You or I were killed as a newborn we would n't be here either. You or I were killed in the womb ( aborted ) , we would n't be here either. This is common sense. I ca n't believe some people are so delusional to believe otherwise .

### 357\_ah\_t1\_cxd3g40.json (ah-ah)

(OOV\_comment\_begin) When the bulk of black people are dying at the hands of blacks and not the police I find it extremely hypocritical and like OP , extremely OOV Maybe they should be called , " Black Lives Matter but only when they 're shot by police and not other blacks . "

(OOV\_comment\_begin) Most people are not killed by cancer , do you find cancer research misguided ?

(OOV\_comment\_begin) If the cancer research group was called " swine flu matters " then yes. Because they 're not focusing on the real issues they should be focusing on .

#### 418\_ah\_t1\_crdk8bu.json (ah-ah)

(OOV\_comment\_begin) OOV Even when the couple to proactive actions to use forms of birth control with the specific purpose to NOT create a life when they have sex ?

(OOV\_comment\_begin) OOV Hey ! I know one form of birth control that is 100 % effective against OOV I find it incredibly surprising that so many people are unaware of this OOV Maybe its an education thing .

(OOV\_comment\_begin) Not having sex is not birth control. Birth control is the various methods of preventing pregnancy OOV having OOV

#### 917\_ah\_t1\_dj5hy4o.json (ah-ah)

(OOV\_comment\_begin) OOV You know , I was about to write a long and OOV answer to all your points presented above , but your ( im pretty sure OOV ) choice of words above told me more about your personal values than all of your posts above. This was an equivalent of dropping a n-word in a conversation about racial OOV Im pretty sure we are not going to convince each other after that bomb was dropped , so , lets agree to OOV Good day to you OOV .

(OOV\_comment\_begin) OOV What ? how is slut offensive ? it 's a choice. being black isnt a choice. if you dont want to be one , then dont be. I said I would feel that way. its not a good OOV How would you call people who cheat and sleep around ? I ca n't belive I am being attacked for not being a cum OOV you people are crazy. I am not cool enough for you people ? are my traditional values not ok ? lol .

(OOV\_comment\_begin) OOV https : OOV OOV OOV ? OOV OOV you further prove my point. I say , good day to you , OOV .

#### 327\_ah\_t1\_cwbnqn5.json (ah-ah)

(OOV\_comment\_begin) I know the argument for hunting is a thread in itself , so I 'm keeping this thread exclusively about OOV meat ( 99 % of meat sold ) . But I say eating factory farmed meat and still saying you 're against animal abuse is OOV OOV are biologically OOV , and if you 're wealthy enough to be able to read this thread on a personal device then you do n't need meat to OOV We can receive all of our essential nutrients on a OOV , plant-based OOV Iron from greens , carbs from gluten and fruit , protein from legumes and greens , etc etc. When people use the “ but bacon is so good ! ” argument , it makes me think that they value a 10-minute meal more than a life. If you want evidence of factory farming being animal abuse , then watch the documentary OOV ( will link to it when I 'm off mobile ) . The scenes in the documentary depict almost , if not all , major meat manufacturing companies. Reddit , change my view. OOV : \*\* I now can agree that humans are OOV OOV That does n't necessarily we NEED meat to survive though .

(OOV\_comment\_begin) Bro , seriously , I 'm all with you on this. But please. Saying stuff like this OOV is going to get you and your argument ridiculed .

(OOV\_comment\_begin) I would like to know your reasons why you do n't think so. I appreciate the honesty though .

#### 905\_ah\_t1\_dfnfhvf.json (ah-ah)

(OOV\_comment\_begin) OOV It \*is\* OOV The very terminology it adopted is as adversarial as any fascist OOV “ Toxic masculinity ” , “ male privilege ” , “ patriarchy ” and of course its own name. It 's hard to distinguish feminist rhetoric from the rhetoric of ethnic OOV OOV That goes both ways. How do you know it 's not women who are the privileged class ? There is a documented bias in both men and women to favor women. That bias could be and probably is informing you more than you OOV OOV Tell that to a man who is n't doing fine. Or are you saying that does n't exist ? OOV Have n't you ever looked ? How can you then conclude that women have more disadvantages ? OOV Suicide



attempts are absolutely not the same thing as actual OOV And to throw the one stat in just to dismiss the other is , both , logically flawed and morally OOV OOV That 's completely OOV By almost every objective measure of living standards , women fare significantly better than men .

(OOV\_comment\_begin) OOV A quick glance through your history shows a guy who is just as OOV “ OOV ” as you believe the feminists to be “ OOV ” It 's going to be difficult to have an objective debate with you , but I 'll try. OOV Tell me scenarios where your average woman has more advantages than men , and leave out the sexual stuff. Because for every example you give , I can probably give 3 where men are OOV The system is set up for men to succeed , mainly in government. Look at our lawmakers ... do you think that is representative of our population ? Our most influential group of people have a huge shortage of women. That 's why it 's considered a “ OOV ” Because this is a country formed by men , and currently governed by men. To be a “ feminist ” is to say “ hey , I do n't feel women are equally OOV ” You are basically saying “ Well , you have enough other stuff so stop OOV ” OOV To favor women in what context ? You know who else people are often universally in favor of ? OOV People also happen to be in favor of equality , which is OOV why both men and women “ favor ” women , whatever that means. OOV OOV , men are doing fine. We get more jobs , we do n't have to go through labor , we are paid more , we 're universally stronger , we represent the vast majority of our OOV May I ask how we , systemically , are \*not\* doing fine ? ¿ Where do men have disadvantages ? OOV Yes. Are you seriously answering my question with a question ? Answer my questions please. OOV Why is one worse ? “ OOV reprehensible ” ? Are you listening to yourself ? You realize you left out that one statistic too , right ? Holy shit ... Let me ask you this : do you know why men are more successful with suicide attempts ? The fact that one gender gets driven to suicide is OOV OOV than ones ability to be better at it. Way more men have guns than women. Guns are very OOV If an equal amount of women had guns , then there 's no doubt you 'd see 3x more successful suicides than men. But furthermore , the ability to be more definitive and violent with a suicide is not what should be focused on. What OOV someone to want to take their own lives is the important part. And 3x more women are driven to commit OOV But even OOV importantly is that even though 3x more women attempt suicide than men , you still consider suicide to be OOV problem. You are proving to sound very lacking of general empathy toward women. OOV Again ... HOW ? You know there are men that systemically kill women for the sole reason of not being able to have sex with them. How many women in history do you think have done that ? All I see from your initial post is “ women make fun of us and call us creepy ” and “ women do n't care about us ” and “ women are OOV ” Everything you are saying about women is the OOV exact OOV that make you fear OOV Despite what you may think in your head , you clearly do n't see women as equal , and I think that 's your underlying problem. I can change an opinion , but it 's really hard to change a fundamental flaw in your perception of an entire gender .

(OOV\_comment\_begin) OOV I do n't mind feminists being “ OOV ” ( unless they claim to be for equality of course ) . I mind them being OOV OOV First of all , why leave out the “ sexual stuff ” ? It 's an important part of life. There are countless circumstances in which women benefit more than men. But the most dramatic and strongly indicative of others is situations where men are expected and even forced to sacrifice their lives for women. OOV Except more men fail than women. OOV , homelessness , accidents etc. OOV You 're OOV the decision OOV Yes , more politicians are men , but they 're there because a majority of women decided it to be so. On top of the majority of eligible voters , women also have a strong political lobby which men do not. The fact that those representing women are mostly men , does not mean they 're not being OOV Eg : is your lawyer representing you because you hired them or because they share a common biological trait ? OOV Women are OOV represented politically than men. Significantly so. Yet feminists say the OOV OOV I 'm not. But that is what feminists often say. OOV In OOV Women are higher up in social status by OOV That 's one of the reasons men earn more and go for higher profile jobs - it 's a response to their lack of inherent value. OOV Actually they do n't favor OOV That 's the problem. For example , when men treat women equally , that 's perceived as sexist against women. People OOV it equality but that 's because their scale is out of OOV They are n't aware of that. OOV The criminal justice system is heavily biased against men. That 's not “ fine ” . Not to mention family court. Why are n't you aware of those things ? OOV That 's not correct. Unemployment among men is more often higher then

among women. OOV Neither do women. OOV No. Men OOV more. OOV That 's not OOV It 's also not an automatic advantage otherwise women would also be OOV Funny you never actually look at things OOV Otherwise , you 'd have noticed long ago that men also have to eat a lot more than women forcing up basic living OOV Also , the number of times “ being stronger ” is just a reason to do more work or lift and carry for others should be taken into account. OOV Because I do n't think you have looked or , to the extent that you have , it 's nothing like as much as you 've looked for disadvantages affecting women and/or listened to those advocating for women. OOV Oh I do n't know. “ OOV ” it 's because one results in death ? OOV What are you talking about ? OOV brought up suicide and immediately tried to downplay it with reference to attempted OOV OOV I know why feminists OOV men are more successful at it. They say it 's because men use more effective means such as firearms while women use less effective means like OOV What they “ forget ” is that the decision to use one method or another , is n't arbitrary and further , the number of men killing themselves by poison is only low relative to how many kill themselves by OOV It 's still OOV than the number of women who kill themselves by OOV So even the most charitable interpretation of that argument is that it OOV account for OOV of the difference in success rate. To present it as \*the OOV is flat out OOV OOV You 're again wrongly equating the two. You 're treating suicide attempts as OOV You 're presuming anyone who attempts suicide is intending to OOV They OOV OOV I OOV So don't. OOV Yes. OOV No - 3x more women OOV OOV You 're counting all cases of feigned suicide attempts as OOV Why would you do that ? Why artificially inflate the numbers ? Why do this in response to a men 's issue ? You need to OOV on this. Ask yourself why you have such resistance to seeing men as OOV What would you stand to lose if you were to accept that men are greater victims than women ? That is the most important question here. OOV How do men “ systemically ” kill women ? Try to phrase things more precisely please. Also , pointing to instances of men killing women , does n't contradict overall numbers. As long as men are greater victims of murder , it 's not a OOV OOV I do n't know the numbers but I know that it 's not uncommon for women to feel entitled to sex with men and in extreme cases that can and has lead to death. Hell even the law sometimes punishes men for not satisfying their OOV Something that would n't fly the other way round because it would be classified as legalizing OOV OOV You 're confusing me with somebody else. Try to keep up. OOV They are n't OOV Our species has two OOV OOV on the other hand , don't. They 're truly equal regarding OOV OOV Well from where I 'm standing , you and many other people are heavily biased but do n't even realize it. What 's strange is , if you were to have such a bias that 's informing you , would n't you want to know about it and try to get to the bottom of it ?

#### 1059\_ah\_t1\_djgbe7k.json (ah-ah)

(OOV\_comment\_begin) The US has a single payer system , OOV It 's not any cheaper than private insurance .  
(OOV\_comment\_begin) If they were allowed to negotiate as a bloc for medications , indeed they would be. And yeah , it scales inversely with the ability to pay using tax money from those with the ability to pay so it depends what you mean , cheaper to implement or cheaper for the person who signs up .  
(OOV\_comment\_begin) OOV The [ CBO OOV ] ( https : OOV ) Do you know better than them ? OOV No , it OOV Economies of scale are not a law of the universe , they are rare exceptions to the fact that scale makes everything OOV there are especially not economies of scale in administration or OOV But by all means , please feel free to show actual evidence to this point instead of just repeating a talking point .

#### 415\_ah\_t1\_d7ymzmu.json (ah-ah)

(OOV\_comment\_begin) It 's generally not a good idea to respond to a question with a question , unless your question is asking for clarification , or you answer the other question first .  
(OOV\_comment\_begin) I was asking for clarification when I asked “ My question still stands , is that what

you are OOV saying ? ” That is the textbook definition of asking for OOV Its also not a good idea to get so caught up in semantics to the degree that you have difficulty answering a question , conversation is a 2 way street friend .

(OOV\_comment\_begin) You did n’t ask what I was asking , though. You asked what I was OOV And it was clear that you did n’t mean what I was asking , since you were asking my opinion on something rather than clarification on my question .

### 215\_ah\_t1\_djfr8pe.json (ah-ah)

(OOV\_comment\_begin) Then would you agree that the birth of new souls into the world is pulling them from a better world into a worse one ( ours ) ? Or is it that non-existence is better than the suffering that our world can give ?

(OOV\_comment\_begin) No , because being born in that framework means being inherently condemned to an eternal hell , with a chance of OOV which can be easily lost. Yes , non-existence js OOV to the current mode of life , as I see it we’re essentially living like drug OOV We suffer many things just to distract ourselves. Any notion of improving the world is OOV out by philosophical assessment ( post modern nihilism , OOV , ect ) and history and stats ( we have more slaves now than ever. We have OOV 60 billion livestock , 80 % living in horrid conditions ) .

(OOV\_comment\_begin) Then die. Or you do n’t truly hold that view. Thankfully , you do n’t believe in helping to better others , or you ’d try to kill them too. The argument is inherently flawed because the endpoint of such a philosophy is fundamentally horrific and we ’d be cheering on Manson and OOV When the hero is a guy who carved a swastika into his forehead , the philosophy may be flawed .

### 657\_ah\_t1\_diursdw.json (ah-ah)

(OOV\_comment\_begin) OOV Sources contemporaneous with Mozart all agree that he was a ridiculously gifted pianist and OOV He played both at a professional level as a child. He toured Europe as a child prodigy before he made a name for himself as a OOV He also had perfect pitch and could play anything after hearing it once. OOV was the definition of a good musician .

(OOV\_comment\_begin) OOV is not what makes the musician .

(OOV\_comment\_begin) Ok , so electronic composers are n’t real musicians , and a guy like Mozart who was the master of multiple instruments by the age of 5 is n’t a real musician either. Got it. YOU ARE THE ONE WHO MADE THE OOV THAT USE OF A REAL OOV = OOV Technical mastery does n’t equate to lack of feel or anything else that you may think “ makes the OOV ” It ’s not a one or the other sort of thing. So what do you believe “ makes the musician ” then ? BTW , I was simply pointing out that your claim that there is n’t “ enough information ” re : Mozart as a musician as opposed to a composer is demonstrably OOV Which is something you could ’ve easily looked up instead of just assuming that your ignorance was somehow meaningful to the discussion re : Mozart .

### 619\_ah\_t1\_d7prvks.json (ah-ah)

(OOV\_comment\_begin) OOV And ? Homosexuality is n’t gone from the “ mental illness ” lists for that long .

(OOV\_comment\_begin) I ca n’t believe you are actually comparing being suicidal to being OOV Talk about a OOV Being suicidal is never going to be considered a function of a healthy mind and people are never going to stop trying to save suicidal people from themselves. It is always a symptom of an underlying problem. Well adjusted and happy people do n’t commit OOV It just does n’t happen. If you think it OOV happen , I would be very interested to see your OOV Because in all of my time working in healthcare and in all of my personal

studies of psychology , I have never seen so much as a footnote stating that sometimes happy , healthy people kill themselves .

(OOV\_comment\_begin) OOV Why not ? Homosexuality is a fine example of something that was considered a pathological condition not so long ago , showing that it 's quite possible to OOV things in that direction ... rendering the " it 's in the DSM , so it 's a disease " argument OOV OOV If you think it does happen , I would be very interested to see your OOV Because in all of my time working in healthcare and in all of my personal studies of psychology , I have never seen so much as a footnote stating that sometimes happy , healthy people kill themselves. Why do you think " being unhappy " is a curable disease ? Why do you think that people are OOV to keep trying to get happy until they die a natural death ? Again , this reminds me of attitudes against divorce , a century ago. No matter how bad your marriage got , divorce was OOV OOV and you had to keep on trying regardless .

#### 852\_ah\_t1\_ddrenoo.json (ah-ah)

(OOV\_comment\_begin) Their sub is a complete OOV of racism , sexism , paranoia , hypocrisy , and bigotry of all OOV I could spend weeks OOV the cream of the shit to drive home my point better , but here 's a sample of posts and top comments happening RIGHT NOW ( 10:00 pm ET ) : OOV ( typical conspiracy nonsense ) OOV ( Sean Spicer press conference ) OOV ( link to a CNN tweet that reads " How having kids can ruin your romantic relationship " . The stock image used in the tweet shows a white couple ) OOV OOV OOV ( OOV mod comment ) OOV ( 438 OOV Responding to an article about Saudi Arabian family that leaves baby in car while they go inside theater ; police do not press charges ) OOV ( 183 upvotes ) OOV ( 51 upvotes ) OOV OOV ( 108 upvotes - " invasion force " refers to immigrant populations ) OOV ( 146 upvotes ) OOV OOV ( OOV valentine 's day post )

(OOV\_comment\_begin) None of those things backed up your initial rhetoric .

(OOV\_comment\_begin) I 'm not sure how better to convey the idea of bigotry than the words " OOV ! " posted multiple times in capital OOV Please enlighten me how real bigoted conversation sounds like .

#### 674\_ah\_t1\_cynqky0.json (ah-ah)

(OOV\_comment\_begin) OOV You do have the power to stop OOV Are you currently going out onto the street to stop murderers ? The vast majority of civilians avoid going to places with OOV They OOV on by ' bad OOV We do n't generally hold them responsible for OOV We should n't hold people responsible for being unwilling to risk their lives. So no. Should I hold you responsible for any murders you fail to prevent ?

(OOV\_comment\_begin) OOV What murder do I have the power to stop ? I 'm talking about a situation in which I see a murder taking place in front of me. OOV Avoiding bad areas is not the same thing as witnessing a murder in progress. And normal people usually do n't have the power to stop murderers unless they have a OOV In which case I think they do have a responsibility to try and stop it. OOV Of course not. They are not OOV They are not trained to stop such things. He is. If a normal civilian did have such training and chose to do nothing , I would hold him responsible .

(OOV\_comment\_begin) OOV You could actively seek out OOV By choosing not to do so you endanger lives. OOV Yes , it 's worse. By avoiding any responsibility you endanger lives. If everyone who was afraid of the night walked in it the night would no longer be OOV The more normal people who go into dangerous places the less dangerous they OOV You can also get a OOV OOV Batman is n't trained to stop people. He is trained in martial arts , which any civilian can pick up. He 's not a member of the police who are trained to capture criminals .

#### 41\_ah\_t1\_dhnf6r4.json (ah-ah)

(OOV\_comment\_begin) OOV What the fuck ... And quotes ? Who said that random ass shit ? ! War IS a social program , it 's just an evil one .

(OOV\_comment\_begin) We were having a nice discussion about opportunity cost ( which is the point of this thread ) , and you reduced it to medicine vs bombing children. The dichotomy you presented was irrational and absurd .

(OOV\_comment\_begin) Read that again and tell me what you think the opportunity cost is between war and medicine .

#### 1218\_ah\_t1\_db4kksx.json (ah-ah)

(OOV\_comment\_begin) Yes , I pay taxes and I would be very happy to see some of them go towards OOV I would gladly pay more in taxes , frankly .

(OOV\_comment\_begin) the IRS accepts OOV Feel free .

(OOV\_comment\_begin) Do we currently have universal healthcare ?

#### 1174\_ah\_t1\_d0ommfs.json (ah-ah)

(OOV\_comment\_begin) I 've seen this discussion play out many times. It 's not a failure to see your point ; it 's a disagreement with it. Trump 's supporters exist exactly because people are fed up of having their objections to illegal immigrants interpreted as bigotry against Mexicans , objections to extremist interpretations of Islamic teachings interpreted as bigotry against Muslims ( or even more broadly , against anyone who looks vaguely OOV ) , etc. Tired of the assumption that “ thug ” \*really\* means a black person , ignoring the [ history of usage ] ( http : OOV ? OOV ) of the word specifically referring to fascists and other OOV ( most of whom were pretty pale ) , or the [ common dictionary definition ] ( https : OOV ? OOV : thug ) . Tired , generally speaking , of being OOV for hidden bigotry and the assumptions that one thing is always a proxy for another. It violates Occam 's razor , and insisting on it only strengthens the OOV Put another way , and I say this as a Canadian who votes for the NDP : you seem to think that OOV it were the OOV that the US were being flooded by illegal immigrants from Canada ( say for example , OOV looking for jobs after the oil crash , or other “ economic refugees ” dismayed by the sinking Canadian dollar ) , Trump would \*not\* be calling for a northern wall. OOV do you believe this is OOV ? Also , while we 're on the topic : Did you know there 's [ already a fence there anyway ] ( https : OOV % E2 % 80 % OOV ) ? What Trump proposes is rhetorically dramatic , but not in fact nearly as radical as people seem to think .

(OOV\_comment\_begin) Because they would be white OOV Trump does n't want to keep immigrants out , he want to keep brown people out .

(OOV\_comment\_begin) What 's your evidence for that ?

#### 812\_ah\_t1\_d7s16sq.json (ah-ah)

(OOV\_comment\_begin) OOV ... by making shit up. “ Oh hey , I do n't have to pay for postage anymore because it 's my deeply held religious OOV ” OOV ... except in places where you ca n't .

(OOV\_comment\_begin) OOV The law protects only bona fide religious OOV OOV That would n't survive strict OOV OOV ... which does n't apply in the US .

(OOV\_comment\_begin) OOV Oh cool , so you agree with me it would n't protect people trying to opt out of paternity OOV OOV LOL http : OOV

#### 472\_ah\_t1\_cjmmnc11.json (ah-ah)

(OOV\_comment\_begin) OOV How do you know your prong was n't fucked up OOV anyone took a knife to it ? Why not blame god or your genes or your parents ? Or why not all three , there 's always more angst to spread around if you need it .

(OOV\_comment\_begin) Just when I thought I was the the one wasting my time in the most pointless way on this site .

(OOV\_comment\_begin) So do you know ? I presume your failure to answer rests upon the epidemiological impossibility in entails .



### 805\_ah\_t1\_dgywa17.json (ah-ah)

(OOV.comment.begin) OOV Not at all. Most people who molest children are not OOV One is a sexual orientation , one is an act of abuse general driven by desperation or wanting an easy OOV OOV Not true. Being a pedophile just means your sexual preference is for children. Most people who have sexual contact with children do not have a sexual preference for children. Which is why they typically do n't care about gender and boys are abused disproportionately - men have easier access to boys than OOV OOV I have no interest in OOV OOV I do n't struggle not to have sex with children. Even if it were legally , socially acceptable , there were n't any ethical concerns , and I were close to OOV , its not like I would immediately try having sex. Unless they were the one to initiate I 'd probably do nothing .

(OOV.comment.begin) OOV It absolutely is. You can repeat this lie till you are blue in the face , but anyone who sexually exploits a child will always be a OOV This is an incredibly obvious attempt to obscure terms for the sake of OOV That act in and of itself is incredibly OOV You should be ashamed of yourself for attempting it. OOV This is just another way of saying " I have a rape desire " . Children can not OOV They have not the experience nor understanding of the act to meaningfully grant it. As well , since they have not gone through puberty , they lack the sexual characteristics to make the act even possible. A child can be penetrated , they can be molested , they can be coerced into a sex act , but they can not have sex. So when you state what you did above , you are either admitting you are too mentally deficient to understand reality , which is mental illness , or you are dressing up your violent urge to assault children , which is mental OOV " Age " is not something like OOV It is a quality that inherently changes in all people. It is a marker for massive physical and mental vulnerability for the OOV Being a pedophile just means being an inherent OOV OOV This could be believable if the concepts of lying and rationalization were n't around. As a pedophile , you are admitting you are an inherent OOV Your word means nothing. OOV Again , since you are an inherent predator , I can not take your word for it. I 'm not willing to risk the rape of a child on your claim of OOV of what you admit to OOV If you want others to believe you have no intent on raping a child , submit yourself to psychiatric help for your mental disease until you are rid of it. That is the only way to prove you are actually a good person .

(OOV.comment.begin) OOV Do you have any reason for believing this falsehood ? Are is it true simply because it is ? OOV OOV Even if I wanted to rape children ( I do n't ) , that would still be providing more information than " I have a rape desire " . OOV Not relevant , regardless of whether its true or not. We 're not talking about having sex with children. OOV Sex is a lot more than one possible act. They certainly can participate and seek such contact on their own without any coercion by adults ( they do it among themselves all the time ) . OOV Sounds like your are talking about your inability to tell the difference between a pedophile and child OOV OOV It may be used a marker for that , its just just how long its been since they were OOV Whether they 're in a coma , a cryogenic sleep , etc does n't matter for age and it ignores differences between people ( plenty of adults are much more vulnerable than the average child ) . OOV No more than being alive. OOV What mental disease ? I might have a minor case of OOV or maybe a bit OOV Maybe you mean one of those ? Not sure what those have to do with what you are talking about .

### 568\_ah\_t1\_cji308v.json (ah-ah)

(OOV.comment.begin) Racism is all about highlighting the difference between you and them. I am NOT saying it was your intention , but making fun of an accent can be perceived as racism because it is as though you are saying , " hear how obviously non-white American this person sounds ! ! ! " It has to do with race

because that accent is associated with and possessed by many of that race ; that 's like asking what OOV has to do with African-Americans ( it 's IN THE NAME ) . I have a Japanese boss and his English is not bad , but my co workers will sometimes imitate his speech in a “ flied lice ” sort of way , emphasizing his status as a foreigner , which is inextricably tied to his race .

(OOV\_comment\_begin) Not everything about differences between two people that happen to be from different races is about OOV OOV No , it 's only tied to his being as a foreigner , and because the education he had in Japan. If it were a racial thing second generation Japanese would still have OOV marking difference in the OOV and the OOV They do n't , it 's a cultural thing .

(OOV\_comment\_begin) Second generation Japanese , hell ALL EAST ASIAN PEOPLE deal with “ flied lice ” OOV Definitely means it 's a race thing. Race means you look at someone and say “ they probably have X accent ” just based on their appearance alone .

### 781\_ah\_t1\_cmlmi0n.json (ah-ah)

(OOV\_comment\_begin) Sure , you 're literally “ free ” to film someone but that does not a right make. You 're free to drink alcohol , but that 's not a right ; you 're free to drive a car , but that 's not a right ; you 're free to swim in a pool , but that 's not a right. Not everything we 're allowed to do is a right. You 've ducked and dodged every point made or OOV it with hardly intelligible logic that I ca n't stand to pursue trying to convince you that you 're wrong about what 's a right. Maybe go to law school before you try and discern what 's a right .

(OOV\_comment\_begin) The right to swing my arm ends at your face. If you do n't have a law you can stand on that prevents me , it 's my right. The freedom to do that is the right that backs it up. This is n't ducking and dodging , it 's refuting your central point .

(OOV\_comment\_begin) You 're wrong. You do n't seem to understand that a legal right is something that absolutely can not be taken away by a law. You just seem to think that a right is something that 's not OOV The way we use the word “ right ” in the vernacular is markedly different from what a legal right really is. Legal rights are defined and specific , not an ambiguous cluster of things citizens are allowed to do .

### 535\_ah\_t1\_cmw8lci.json (ah-ah)

(OOV\_comment\_begin) I agree , there is more to life than OOV That said I 'm not keen on your point. You think intelligence is fixed at birth ? How do you explain children with more well off families doing better in school than poorer children ? Do you think poor people are born stupid ? I think environment certainly plays a massive part .

(OOV\_comment\_begin) OOV IQ is correlated with income , for obvious reasons ( smart people can get OOV jobs ) . People with high incomes usually have children with high OOV because they themselves tend to have high OOV Studies on twins and adopted children are able to measure the degree to which IQ is determined by OOV What they 've found is that : 1. IQ in early childhood is mostly environmental , and IQ in adulthood is mostly OOV By the age of 18 , genetics explains about 75 % of variance in OOV 2. Some of the remaining 25 % is explained by shared ( family ) environment , but much is explained by what is known as OOV environment. This is a catch-all term for the OOV , random stuff that causes even identical twins raised together to have different OOV It may include things like measurement error ( the same individual 's IQ score will vary slightly from test to test ) , infectious disease , individual lifestyle choices , and who knows what else. The bottom line is that home environment really does explain a pretty small percentage of variation in adult OOV The primary reason poor people tend to have children with low OOV is that they themselves have low OOV ( which is why they 're poor ) and they pass those genes on. In other words , yes. They really are born stupid more often than not. This is why poverty can persist for generations in American families while the children of poor immigrants ( who are poor because they come from poor countries and not because they have low OOV ) often make it into the professional class or higher within a single generation .

(OOV\_comment\_begin) OOV Do you trawl for arguments you 're late to often to make points which seem a bit OOV ? ? ?

#### 475\_ah\_t1\_dkmucgu.json (ah-ah)

(OOV\_comment\_begin) OOV Noam Chomsky is 10x more harsher on American history and culture than OOV mass produced history textbook for American OOV ( Disclaimer : I think he is very biased when it comes to not calling out Communist countries ) . OOV The problem was your OOV Not the OOV The problem with US History textbooks is that they do not focus on actual politics and civics enough. They do not focus on OOV the federal government makes decisions and OOV is actually behind these OOV OOV propagate the myth that America is NOT a Republic first and foremost guided by a very narrow master class ( this is not necessarily a bad thing – its actually good ) OOV OOV If someone telling you raw history ( to the best of their ability ) makes you feel “ attacked ” , then no amount of OOV will allow enough ego dissolution on your part to help make fundamental changes to society OOV with too much of a fight. P.S. , I 'm definitely not one of those people who “ hates OOV ” OOV people will fight anything that changes their OOV We change society not by changing them. Society changes as they die off and its new members replace OOV Oh , and this just does n't apply to rural conservatives or whatever ... but to pretty much every other OOV Just look at how homophobic older generations of blacks are , and now compare that to millennial African Americans. OOV : \*\* I 've looked through your comment history. OOV honest history textbook would offend OOV You ca n't even admit that the South literally OOV over OOV OOV every single OOV Confederate state declared that they did so to protect OOV OOV \* ” Our position is thoroughly identified with the institution of slavery – the greatest material interest of the world. Its labor supplies the product which constitutes by far the largest and most important portions of commerce of the earth. ” \* OOV \* ” For the last ten years we have had numerous and serious causes of complaint against our OOV confederate States with reference to the subject of African OOV They have endeavored to weaken our security , to disturb our domestic peace and tranquility , and persistently refused to comply with their express constitutional obligations to us in reference to that property ” \* OOV \* ” She was received as a commonwealth holding , maintaining and protecting the institution known as negro slavery – the servitude of the African to the white race within her limits – a relation that had existed from the first settlement of her wilderness by the white race , and which her people intended should exist in all future time. Her institutions and geographical position established the strongest ties between her and other OOV States of the OOV ” \* OOV \* ” The people of Virginia , in their ratification of the Constitution of the United States of America , adopted by them in Convention on the OOV day of June , in the year of our Lord one thousand seven hundred and OOV , having declared that the powers granted under the said Constitution were derived from the people of the United States , and might be resumed OOV the same should be perverted to their injury and oppression ; and the Federal Government , having perverted said powers , not only to the injury of the people of Virginia , but to the oppression of the Southern OOV States. ” \* OOV OOV \* ” We affirm that these ends for which this Government was instituted have been defeated , and the Government itself has been made destructive of them by the action of the OOV States. Those States have assume the right of deciding upon the propriety of our domestic institutions ; and have denied the rights of property established in fifteen of the States and recognized by the Constitution ; they have denounced as sinful the institution of slavery ; they have permitted open establishment among them of societies , whose avowed object is to disturb the peace and to OOV the property of the citizens of other States. They have encouraged and assisted thousands of our slaves to leave their homes ; and those who remain , have been incited by emissaries , books and pictures to servile OOV ” \* In your other CMV , you ask defensively : \* ” Look at Taiwan , Scotland , or OOV Should those nations have the right to form their own states and fend for themselves ? ” \* What is the answer to that question ? I do n't know. But I 'm pretty sure that they would n't secede just so that they keep black people as slaves to pick OOV Yeah , Christopher Columbus sailed around the world and ushered in the colonization of the Americas by the OOV But in your words , he was also “ awful to Native Americans. ” There is no way to emphatically state that second part in a way that OOV offend the type of people that you 're OOV OOV : Dr : The problem is n't the history OOV Its OOV By YOU ... I do n't necessarily mean YOU OOV But I mean the kind of people that you are OOV You seem like a decent person !

(OOV\_comment\_begin) OOV I 'll agree with you there. I 'm not always a fan of his , but when most people have never heard any kind of real critique of their country , Noam Chomsky is a great red OOV I 'm not a communist or even a socialist , though. OOV Someone else made a similar OOV I think you are used to old racists and OOV , not young ones. Remember that these are high school kids we 're talking about. These are the new members who are replacing the old ones. I much prefer the younger generation in my hometown to the older generation , and I find them OOV more socially OOV , more tolerant , and more empathetic to others , and OOV less racist , sexist , and OOV That being said , lots of them have a hell of a long way to go and your policy of waiting for 15 year olds to die off is a little OOV I do n't think you know these people as well as I do. After all , I grew up with them and actually took this class with them. They were at their most open and OOV They are still being OOV How will you create a new generation of tolerant people if not through institutions like high school ? OOV As creepy as it is to look through someone 's post history , I 'm thinking you must have just skimmed it or looked at what I 've posted in OOV That 's a fairly old post and it does n't represent my political or historical views today. Here 's a history assignment for you. Remind me of the date I posted that on CMV , and then scroll up to the top of this post and remind me of how long ago I took the AP class I 'm talking about. I do n't recall them being all that far OOV And

then for bonus points , feel free to go ahead and look at my involvement in the OOV and OOV OOV You might find that secession movements are very interesting to me as an OOV I attempted to defend my belief in the right of societies to secede from their governments , which is an OOV principle , by taking up the only defense I knew of an act of OOV Clearly that was a mistake , and the association of secession with the Civil War is very unfortunate and I should not have added to it. I no longer believe the states 's rights OOV , and out of that post I only retain three points I can think of : 1. The North deserves more criticism for its treatment of black people , the south after the war , and even its own white citizens. Being better than the South does not mean your actions are at all OOV 2. War is not an acceptable response to secession , even if the other country has OOV The South shot first at Fort Sumter and the South did fight for slavery , but the entire reaction to Fort Sumter WAS under the control of the North , and the reaction was not the proper one. This is not something you will likely agree with , since you are not likely an OOV 3. OOV , or the belief in the moral authority of government , is actually what allowed slavery to exist in the first place and for war to break out over it. Any detailed discussion on the Civil War is really irrelevant to this thread , and I wo n't be responding to any other attacks on old beliefs I do n't even hold anymore .

(OOV\_comment\_begin) OOV Okay , but the OOV still literally killed more Americans than the Nazis so that they could keep black people picking their OOV OOV Okay , but the South fired the first shot. They committed the first act of war. And they attempted to illegally requisition federal property. You also conveniently ignore the fact that not fighting the secession would have severely weakened the Union because the very act destroyed the legitimacy of its constitution ... the skin that holds the United States together. The Union was fighting the South to simply save itself. OOV terrorists have no rights when they threaten another country 's integrity , even if they do so OOV Especially when they fired the first shot ... and OOV to keep black people picking OOV OOV Victim OOV OOV If you do n't want someone declaring war on you , do n't commit a war crime. It OOV OOV You 're like blaming someone for getting randomly punched in the face by a cowardly asshole and then fighting back. OOV No , it is very OOV It illustrates how you think and the very fact that maybe , OOV 's not the books. Its OOV OOV fundamental part of this CMV is about changing people 's opinions with facts and raw , true history. You 're still being a Confederate OOV There is/was absolutely nothing legitimate , moral , or acceptable about their entire existence. The Confederacy was first and foremost about white OOV Full stop. End of OOV Here 's what Adolf Hitler had to say , \* " Since the civil war , in which the southern states were conquered , against all historical logic and sound sense , the American people have been in a condition of political and popular decay ... The beginnings of a great new social order based on the principle of slavery and inequality were destroyed by that war , and with them also the embryo of a future truly great America that would not have been ruled by a corrupt caste of tradesmen , but by a real OOV that would have swept away all the OOV of liberty and OOV " \* OOV = White master race. I 'm sorry bro , but even Hitler thinks the South OOV for white supremacy and to extinguish all freedoms of blacks .

#### 601\_ah\_t1.d9bdy7p.json (ah-ah)

(OOV\_comment\_begin) Did you even read your own definition you posted ? Not wanting OOV to say the word nigger does n't come from a sense of superiority over them , it comes from the fact that 1 ) it 's a racial slur specific to Black people and 2 ) even if we 're friends , you never really know if someone is saying it out of OOV The overwhelming majority of Black people rarely , if ever refer to White people as OOV Hell , most Black people do n't even say the word nigga themselves. So there 's no point in even discussing this hypothetical scenario that one will rarely , if ever , encounter in person .

(OOV\_comment\_begin) OOV Have you got a source to back up that conjecture ?

(OOV\_comment\_begin) I 'm OOV My entire family is OOV My neighbourhood is majority OOV The country I was born in is 94 % OOV I can literally count on 1 hand the number of times I 've heard a White person referred to as a OOV I do n't need a source , I literally have decades of anecdotal experience .

#### 184\_ah\_t1.cy0wmb8.json (ah-ah)

(OOV\_comment\_begin) OOV yes it did OOV So you do n't understand what segregation means. Got it. OOV What ? That does n't even make sense. If they have the same amount of wealth then they 're either both poor or both OOV OOV the terms " rich " and " poor " are specifically relate to the amount of money someone OOV OOV It is not a tiny part of the story , it 's by and large the vast majority of the story. OOV Income is a much better measurement of someone 's amount of opportunity than race. OOV But the adversity they face is largely a result of being OOV OOV not as useful as OOV OOV OOV Income is absolutely a more reliable measure of opportunity than race , you just want to pretend like it is n't because you want to keep unfair OOV OOV So you admit it 's unfair , you just do n't care .

(OOV\_comment\_begin) I know what segregation is. And legally it did end. But there is also self segregation that has OOV When integration efforts took place in cities across this country in the 60s and 70s there was reaction of white OOV



Schools are paid for and attendance is determined by OOV So when all the rich white people left the schools with significant black populations , poverty and poor education took root while suburbs OOV This American Life over the summer did an amazing episode covering this. Basically while the narrative is that we do n't segregate , by and large we still do. A study was recently released that found for the first time most Americans are not middle class. You may have seen it since it was big news. The determination for this was OOV Middle class is or at least in that study defined by income of OOV dollars or somewhere around there. So when I say middle class in talking about income , not OOV Wealth is not the same as OOV Wealth is the money and assets you 've already OOV Income is the wage of new money you take in on a yearly basis. You can have an income of \$ 100k and have zero wealth of you spend everything you OOV So having defined those terms a little better let 's look at a OOV Person A has income of \$ 10 per hour. Their car breaks down and they can not afford to fix it. So they borrow money from their parents and pay them back over the next year. They have trouble paying for food sometimes but have more well off friends who will happily buy them meals from time to time. Big costs and little costs do n't add up because they are surrounded by others who can float then until they find a better position. Person B makes \$ 10 per hour too. So you your eyes and the eyes of your admissions board they are OOV But when person B 's car breaks down he has to use the credit card. And paying high interest on that OOV his OOV So he winds up going to check into cash places at outrageous interest because it 's the only way to get by this week. He does n't have friends who can afford to help him pay for this and that so he goes without and is occasionally hungry or malnourished which makes it harder to concentrate and get OOV At the end of the year person A has saved up \$ 500 and person B is in debt \$ OOV But they are equals in your eyes. And there is no good or accurate way to measure this the way you can OOV This is what I mean when I say a middle class black person has as much access to wealth as a poor white person. Poor white people tend to be close to much richer white people while a middle class black person may not have the same friendly or familial resources. And when I say race is one of several indicators and ways of measuring probable wealth it is because we have studies that tell us that this is the case. On a macro level we know blacks will tend to not only have less income , but more importantly less access to financial , social , and educational OOV There is no good way to measure that kind of stuff in a purely economic way but when using race as one of many factors you can at least correct for this imbalance more so than you can without race as a OOV And for the record in solidly middle class and white as the OOV I did not , do not and will not benefit or be hurt by maintaining affirmative action or moving to financial affirmative action. I 'm looking at this purely objectively .

(OOV\_comment\_begin) OOV the most economically harmful thing about desegregation was n't the white people already living in rich white communities , moving to other rich white communities. The true economic harm from desegregation was due to , not white flight , but wealthy black OOV Before segregation rich blacks and poor blacks largely lived in the same communities. After segregation wealthy blacks left the inner city and went to formerly exclusively white communities , leaving only the poor blacks behind in the OOV OOV how do you think you get assets ? OOV no if you spend everything you earn , as long as it 's not on drugs or expensive food or something , you 'd have \$ 100K of wealth in the form of OOV OOV I merely said that income is simply a much better measure of opportunity than race. Person A could be black and person B could be OOV OOV you say that because you have no idea how economic classes work. If they have the same wealth , then they 're either both poor or both OOV OOV ON OOV This does not mean that all blacks make less than all OOV OOV Visit a trailer park or take a drive through the Mountains of West Virginia and come back to me and say that. OOV income is a far better measure of social opportunity than race. OOV Except it would lead to a rich black person having an unearned advantage over a poor white person based solely on race. Is such a situation unfair ? yes or no. If you say yes , then the policy is creating unjust situations and is therefore unjust itself. If you say no , then you have a severely warped sense of fairness .

#### 1245.ah\_t1.dikxv50.json (ah-ah)

(OOV\_comment\_begin) OOV and OOV do n't really fit that well together. and most of your post in this thread are some variation of trying to lie the blame for your OOV on the democrats doorstep , so forgive me if i 'm skeptical what your true intentions OOV OOV OOV OOV the point that i and other people in this thread are trying to make is , the left does n't want people like that. these people represent the worst america has to offer , and the sooner we start to ignore them the better. the aim has to be to mobilize the democratic base to a higher turnout , and pointing out that these people will have the ability to impress their warped values on the rest of the nation if they choose not to speak \*is\* a strong motivator .

(OOV\_comment\_begin) You 're really reaching are n't you ? One is why I voted , the other is a response to the OOV You 're pretty OOV OOV Hillary was being indicted for a OOV Everyone involved in OOV said what went wrong was mainly her OOV So she was responsible for 4 American OOV The Haitians claimed that the Clintons stole from their relief OOV



There 's her OOV with the murder of Seth Rich. What did Trump do ? Make a pussy joke ? Get your priorities OOV OOV Because you could have easily beaten Trump but chose instead to move forward with Clinton despite her baggage and then blame people for not wanting to vote for her. You drove away OOV OOV on you. OOV Well , get used to 8 years of Trump then OOV No , they don't. You 're attitude and superiority complex blind you to the reality. Most of them are blue collar workers whom the Dems have been throwing under the bus for decades. Instead of listening to them , you talk down to them. No wonder no one wants to put up with your smug , condescending OOV OOV So literally silence people you do n't agree with ? Oh , how OOV Fuck freedom of speech. You know better than everyone else , right ? Really worked for you last time did n't it ? Even OOV are sick of people like you. People like you are a blight on your party. I voted for Bernie in the primaries , but like many other dems , we left because of people like you. And you did n't learn a thing. I guess when you ca n't win on merit you have to censor OOV No wonder you lost Congress and the Presidency (OOV\_comment\_begin) not going further down that rabbit hole , especially now that you started to actively distort what i said to better fit your arguments , but i just wanted to say that stuff like that is the reason people say good public education is the biggest threat the GOP faces in this country. some basic effort to inform yourself and a modicum of critical thought , and your comment would have been OOV % shorter .

### 803\_ah\_t1.d5uis62.json (ah-ah)

(OOV\_comment\_begin) Let me ask it a third time , all else being equal , why would I want someone who has difficulties in comprehension over someone without those difficulties ?

(OOV\_comment\_begin) All else is not equal .

(OOV\_comment\_begin) Your inability to answer the question posed is very OOV I 'll drop the point , since you 've essentially answered it by not answering at all .

### 69\_ah\_t1.djwmu30.json (ah-ah)

(OOV\_comment\_begin) OOV This article outlines a disparity in “ deadbeat ” percentage , but it does n't indicate they 're not OOV And it even says that men are going after deadbeat moms ( good ) . OOV Without consent of the mother ? OOV Before what ? Sex ? Everyone should do this , men OOV OOV Nobody can force you to be a OOV You choose to have sex. If you 're not ready to be a dad then do n't have sex with a woman you do n't trust to make the same choice as you. OOV lol what

(OOV\_comment\_begin) OOV If a woman doesnt want to be stuck with a kid she shouldnt have sex. If she doesnt wants someone to father her child she shouldnt have sex with a man who dosent want children. Its the same OOV The unfairness stems from consenting to sex for a man is consenting to OOV OOV to sex for a women is not , because abortion is an OOV Lots of people have causal sex and they shouldnt be OOV with an unwanted child because someone lied about birth control , a condom broke , etc The assertion that every single time someone has sex they should prepare to have children is OOV It goes against the entire point of birth control .

(OOV\_comment\_begin) OOV That is correct. OOV Why is it fair for men to become parents without going through pregnancy ? Why are n't you advocating for some kind of equalizer ? Not a single man has ever died during OOV Millions and millions of women have. So obviously the solution is to kill a proportional number of men who might want to become OOV It 's only fair , right ? OOV Then do n't come crying to me when your birth control fails .

### 413\_ah\_t1.d7dsyp4.json (ah-ah)

(OOV\_comment\_begin) You made a positive claim with no evidence to back it up. I made a positive claim : that black sounding names face discrimination and I have evidence to back it up. Either provide evidence or stop wasting my time .

(OOV\_comment\_begin) OOV No you do n't , you are OOV and skewing the results of the study to support your OOV Maybe if you actually read what people write we would n't have to rehash the same ground .

(OOV\_comment\_begin) Makes bad claims and then shows denial when called out. I 'm done .

### 130\_ah\_t1\_dk0cpui.json (ah-ah)

(OOV\_comment\_begin) OOV I do n't know how this contends with what I 'm saying .

(OOV\_comment\_begin) You OOV said most of us make OOV OOV We make OOV memes , we are n't arguing about gender equality just about retarded feminists .

(OOV\_comment\_begin) Your idea of a “retarded feminist ” is most feminists though. The wage gap , patriarchy , and the gender spectrum are all core feminist issues that are regarded negatively by you and yours. You reject feminism in all but goal .

### 219\_ah\_t1\_dixke3a.json (ah-ah)

(OOV\_comment\_begin) OOV OOV no. What the hell have you been smoking ? : D ” Culture ( OOV ) is the social behavior and norms found in human OOV ” source wiki I can have a culture where I jump every morning for 5 minutes. This behaviour is my culture , it 's not OOV I can OOV to change my culture and jump only during weekends ! Did I change ? No I did n't change. How I act and my behaviour changed ! My culture changed , but I am still the same. Religion is also a choice , religion does n't define OOV Religion defines my beliefs ! I can choose to have different OOV My clothing does n't define ME , it defines what clothes I OOV How you act does not define who you ARE , it defines your OOV You ca n't change who you are , but you can change everything ABOUT you. That is your OOV Conclusion : people are NOT their culture. Culture defines how people behave in social OOV When you understand this distinction , please try hard to understand it , because it can be hard at first , but when you understand that there is a difference , then OOV post makes sense to you : )

(OOV\_comment\_begin) Yes , just like people came to America from Italy they brought zero of their culture with them. none of their religion. Or their language. Or their food. Oh wait , they did. Unless every single Italian Deli I 've ever been to has been a OOV Or every single German Beer garden was wrong. People bring their culture with them. And being a Muslim , in America , is just as part of American culture as someone being OOV The people who pray five times a day are just as American as anyone else .

(OOV\_comment\_begin) Ok , so you understood the concept that culture does not define who you ARE but what you DO ? Please OOV Now to your post : Yes , people bring their culture. OP is arguing that people from Muslim countries with backwards culture should adjust to Western OOV He is not arguing against OOV , german , japanese etc culture. However : OOV OOV

### 881\_ah\_t1\_dlpsy51.json (ah-ah)

(OOV\_comment\_begin) That loses a lot of argument when you say the United State levied war against them as well .

(OOV\_comment\_begin) That 's kind of what you do when one side attacks you first ... Your argument is objectively trash and historically revisionist .

(OOV\_comment\_begin) That 's the kind of what you do when one side seizes a fort from you. Let 's not do personal insults and keep this to a real discussion please .

### 1281\_ah\_t1\_dezkfxb.json (ah-ah)

(OOV\_comment\_begin) That phrase is meant to be about academia and the choice to teach rather than be in the field. Regardless , that 's just a OOV You 've done nothing to show this to be the case. I ca n't help feeling that this is just informed by a negative impression of teachers , not information on how the field actually works. You 're correct

that a bachelor 's degree is not enough to be a OOV That 's why after you 're hired you have to attain your masters degree within a few years to maintain your certification .

(OOV\_comment\_begin) OOV The full joke is , “ Those who ca n't do , OOV And those who ca n't teach , teach OOV ” That 's not a joke about university level OOV That 's a joke about the fact that , in this country , [ we do n't particularly respect OOV ] ( http : OOV ) OOV Then what are we talking about , again ?

(OOV\_comment\_begin) No , the original joke was a quote from George Bernard OOV What you 're talking about is a riff on the OOV It is originally a joke about OOV People may use that to disrespect teachers , but it does n't mean that teachers are actually deserving of that OOV You originally cited it as some sort of truism about the abilities of OOV It 's just a OOV OOV Finish the rest of the OOV It contradicts you. Your initial claim was : OOV 1. Teaching is a Bachelors of Science 2. Teachers are required to gain a Master 's to continue OOV Please follow along .

### 738\_ah\_t1\_dh8dw6y.json (ah-ah)

(OOV\_comment\_begin) OOV being easy to fuck has been true since OOV one smacked OOV two and a chick thought it was pretty OOV Accused and recanted and openly said she did so for the court case. No they do n't , you said specifically he wanted to OOV OOV This is not true you are moving the OOV It is n't the same thing to say the vice president supports allowing someone to choose a therapy they want and the vice president supports running around OOV gays The constitution is just a scrap of paper , it 's a living document as you liberals like to say and when our founders wise and sacred though they be said religion they did n't intend islam to be included there. It 's an Imperial Presidency now and you can live in the light of it .

(OOV\_comment\_begin) This is nothing to do with groupies , please educate yourself. OOV sexual contact is OOV You know , those law thingies that put us above lesser animals , that are a foundation of human society ? The complaints about him were OOV sexual OOV SO please , defend that with a stupid argument about OOV that has nothing to do with what I 'm OOV Keep diverting , it 's not working. OOV I 'll repeat it because you seem OOV incapable of OOV \*the end goal of shock AND conversion therapy is the OOV How is pence pro OOV ? ? ? OOV I 've already asked you twice and you keep giving me alternative facts. Yes , a living OOV That 's not what Scalia said and its not what OOV says today. OOV Lol now it 's just obvious you do n't know history. A religion that 's existed since before the founders , first , if the founders did n't want it to fall under the protections of the constitution , why would n't they mention it ? Oh right , here 's Washington OOV Here 's Jefferson quoting OOV OOV And I will repeat , again , about how for s group of people to say they love the constitution so much , maybe try reading it , and reading the works of the founders .

(OOV\_comment\_begin) The complaints were from women paid by the clinton foundation to accuse him and who got banged and regretted it. Getting fucked and regretting it is n't OOV The end goal can be the same thing sure but that is n't the Claim you make. Your very first claim was OOV a myth invented by OOV You refuse to OOV admit you are wrong. So did semi-automatic firearms but that does n't stop you. We need simply close one eye and their rights vanish simply because we please. You guys showed us the way to simply OOV at will. It does n't need to be logical or based on any reasoning beyond just feelings to change reality. So what , Jefferson was a man who capitulated to Muslims like a bitch , he signed a deal with the OOV because he was too weak to fight the Islamic State for enslaving our people. The weak willed OOV who OOV because like the Muslims he shared a great love of rape and slavery is no father to the nation .

### 702\_ah\_t1.clbuf8g.json (ah-ah)

(OOV\_comment\_begin) OOV Who is “ they ” ? The researchers who produce statistically significant and reproducible results in experiments involving fundamental and previously misunderstood aspects of human behavior ? Something tells me you 're not very familiar with them. They sure are n't making a lot of money by doing it .

(OOV\_comment\_begin) OOV OOV OOV OOV Can you show me the statistically significant and reproducible results in experiments that cause psychologists to claim homosexuality was a mental illness ? Can you point me to the “ statistically significant and reproducible results in experiments ” that cause psychologists to claim homosexuality is not a mental illness

now ? Of course you OOV Psychology is more OOV than a science. In a hundred years , we 'll view psychology as we do OOV OOV I 'm very familiar with them. OOV One of the highest paid “ professions ” . I guess you are n't familiar with them .

(OOV\_comment\_begin) You are not familiar with them ... who would you say is an eminent psychological researcher today ? Do you keep up with psychology journals ? You speaking of the “ Profession ” , as if it 's a single thing , is basically OOV And I assure you the OOV do not pay the best research psychologists any more than other OOV As for your “ can you show me ... ” Firstly , you were dismissing the entire field , not it 's OOV to this one particular question. If you do n't think there are any such studies about any aspect of human behavior then you 've never OOV Second , your question really has more to do with defining “ mental illness ” . But with that in place then of course there have been OOV Do you not think whatever criteria you use are capable of being tested ?

### 303\_ah\_t1\_ddvcwtl.json (ah-ah)

(OOV\_comment\_begin) For fucks sake , you get the canned OOV What the cost of a barrel of oil ?

(OOV\_comment\_begin) I see that you 've run out of rational responses .

(OOV\_comment\_begin) Try answering the question. What 's the price of a barrel of light sweet crude oil today ?

### 903\_ah\_t1\_cybd1sg.json (ah-ah)

(OOV\_comment\_begin) My desire not to get shot OOV your desire to shoot people , yeah .

(OOV\_comment\_begin) 1. You 're making an assumption that I want to shoot people , which tempts to me make some snide remark about projection , but I 'll let it go. 2. No it does n't , or were you thinking that somehow your OOV were more important than mine ?

(OOV\_comment\_begin) 1. Shooting people is the only possible reason for personal gun OOV 2. That attitude is exactly why you can not be trusted with a gun .

### 1082\_ah\_t1\_dbpvfyl.json (ah-ah)

(OOV\_comment\_begin) So you likely did n't read the whole thing , seeing as how I said this is what \*I\* did , and many other people take different paths to accomplish something OOV Also , you sound unimaginably OOV The fact is , there are multiple ways to go about changing your life if you wanted to , but it seems pretty clear that you do n't want to or care to. That 's fine OOV It 's your life. Maybe you 're not this way , but it definitely seems like you view life as just something that just happens to you , and you are stuck with the shitty hand you 've feel you 've been dealt , and nothing you do can change that. And you know what ? You 're exactly right , as long as you continue to believe that. You can OOV me and that other dude and be condescending to people who are just trying to help you in some small measure if you really want to , but ultimately , it 's going to be just you , alone , still stuck in your own personal hell you 've created for yourself. I mean I do n't care either way. My life is OOV I built it that way , tailor-made for me. I have Bipolar ; I have injuries from the Marines that damned me to walk with a cane for much of my early twenties , and even still often require it to this day. I 've had to bury my friends who were n't even old enough to legally drink OOV I know what it 's like to wallow in the depths of despair with no OOV OOV Yet here I am today , and my life is OOV If you really want to , you can continue to wallow in your sorrows , alone , lashing out at people for the rest of your life , running cycle after cycle through the same hamster wheel , day after day , and then you can die. The world wo n't bat an OOV And if that 's good enough for you then cool. Stop bitching about it. You chose this , or at least you chose to stay where you are now and continue to choose it everyday you stay there. Or if that 's not good enough for you , you can try to do something about it , and maybe just maybe you can escape from this personal hell you 've built your life OOV Ultimately , it 's up to you. No one is going to make your life better for you. Either do it yourself or wallow in misery until you die. The only person who will care is you . (OOV\_comment\_begin) I did not choose this , how dare you say that. I have no control over my OOV Your attitude is OOV I have a limited number of options , so I 've chosen the best possible ones. I am not going to kill myself because a couple assholes on the internet think I should .

(OOV\_comment\_begin) Literally OOV OOV told you to kill yourself. And if you 're mad at me , it 's really because your mad at yourself. OOV I did was describe your likely future based on the things you yourself said , and then gave you some cold facts about reality. The world does n't care about you. The life you have now ? Maybe you did n't choose every aspect of it , but you sure as shit are choosing to stay in this bitter personal hell you 've built for yourself. That \*is\* your choice. It 's a choice you keep making over and over everyday , and until you realize that , until you realize you are the only one

who can lift yourself out of this hell , you 'll continue to rot there , bitter and alone. I do n't want you to kill yourself. I 'm not mad at you , and I wish you no ill will. I pity you .

#### 423\_ah\_t1\_dmy386n.json (ah-ah)

(OOV\_comment\_begin) None yet , but they 're working on that. There 's decent odds it 'll be possible within our OOV .

(OOV\_comment\_begin) So until that happens , that argument is completely irrelevant .

(OOV\_comment\_begin) It 's not an OOV It 's just a demonstration that chromosomes dictate far less than your average person thinks .

#### 891\_ah\_t1\_d78tv0y.json (ah-ah)

(OOV\_comment\_begin) Completely irrelevant and bizarrely OOV .

(OOV\_comment\_begin) The point being a willingness to question the long term effects of GMOs is a scientific quality and labelling it as political fear mongering reduces perception of truly damaging fear mongering the public is subjected to OOV Anything else you do n't understand or would you like to keep throwing needlessly large words at me .

(OOV\_comment\_begin) GMOs have already been proven to be safe. Literally the only problem with GMOs is OOV using it in their own way to screw over OOV Which has nothing to do with " long term OOV " There are no long term OOV These things have been extensively OOV It 's safe. Looking at a pile of studies contradicting your point and going " Well , MAYBE they have negative effects ... Just need to be skeptical ... " IS political pandering and OOV and is only OOV I really do n't get your complaint about by supposedly " big words. " They have OOV God , we 've really gotten to the point where an argument is dismissed because of the length of a couple words .

#### 1113\_ah\_t1\_cw06d0t.json (ah-ah)

(OOV\_comment\_begin) I think it 's more that the problem is OOV to be a symptom of patriarchy , which it usually is. Ideas about men needing to be rich and violent and sexual stem from patriarchal gender roles where men are dominant and women are OOV I do n't think feminism is ABOUT ignoring men , not any more than the civil rights movement is about ignoring gay people. Feminism is a women 's movement , but that does n't make it an OOV movement. It 's not OOV Men and women can face unique problems and find their own ways to address these problems and advocate for themselves without taking away from one another. In fact , usually fixing a problem for one gender improves another gender 's position - e.g. , if we could give men custody more often and view stay-at-home dads as qualified and manly , it would legitimize women who want to focus on their careers and be taken seriously in the workplace .

(OOV\_comment\_begin) OOV Thus you mark yourself as having OOV the conclusion ... Seriously , you 've named the virtuous movement to end oppression after women , and the evil system that hurts people after men , and you honestly expect me to believe that you are n't inherently biased when thinking about this ? OOV Really ? All of the laws , rules , and regulations intended to support ( female ) victims of domestic violence [ regularly result in male victims of domestic violence being charged with violence unless they can unequivocally demonstrate that they 're the OOV ] ( https : OOV ) This is n't merely society 's predilection , this is [ OOV OOV ] ( http : OOV ) Somewhere around 1/3 of the criteria , statistically speaking , declare men to be the aggressors OOV independent of any OOV Here , I 'll prove it : OOV , completely imaginary scenario : My gf ( 5'4 " ) declares that she 's going to kill me and comes at me ( 6'1 " ) with a knife , intending to kill me. I , luckily , grab her wrist , grip it tightly enough to make her let go of the knife ( leaving significant bruises ) , find some way to restrain her , and call the OOV By the time the police arrive , I 'm fucking livid because someone just tried to murder me , and she realizes that shit hit the fan , and we 're in crisis OOV Thus , she 's crying ( the natural OOV response of women to non-physical crises ) . Let 's go through the " Must consider " list , shall we , and note who each points to as the aggressor ? \* Offensive and defensive injuries : She 's injured , I 'm not. OOV \* The seriousness of injuries received by each party : She 's injured , I 'm not OOV \* Threats made by a party against the other or a family member or a pet : OOV ... unless she lies and says I threatened her , so OOV \* Whether a party acted in self-defense or in the defense of another : [ Wo n't be considered , regardless of the law , ] ( http : OOV ) especially since I 'm livid and she 's OOV OOV \* The height and weight of the parties OOV \* Which party has the potential to seriously injure the other party OOV because they wo n't acknowledge the knife \* Any history of domestic violence between the parties : OOV \* Prior convictions of assault : OOV \* Orders for protection that have been filed by a party : OOV \* Whether a party has a fearful demeanor : Her tears will be construed as being from fear , and rightly so , but not fear of me , fear of repercussions of her actions. OOV \* Whether a party has a controlling demeanor : My controlled rage will be interpreted as " Controlling demeanor " OOV \* Witness statements : No witnesses OOV That 's OOV against me , and OOV against her ( counting threats against both of us ) . I 'm fucked regardless of the facts. All because I happen to be OOV So , tell me again how feminism is n't about ignoring men ?



(OOV\_comment\_begin) Okay , time for some history. A few hundred years ago ( and I would argue as recently as maybe OOV years ago ) , gender roles were pretty clearly OOV Women , the “ fairer sex , ” stayed home and were barred from most public discussions and activities. They could n’t hold jobs or work outside the home , they did n’t go to school , and they certainly could n’t vote. This was due to a variety of factors , a big one being OOV Back then , there was no reliable method of family planning , so people had large families and women were pregnant for large swaths of their lives. They were needed at home to care for the children ( without formula feeding , pumping , or the ability to afford a wet nurse , a mother was the only one capable of caring for an infant ) . The idea that a woman was a homemaker and a man was a provider was ingrained in most peoples ’ OOV There was n’t much of an OOV The second factor is that women are physically smaller and weaker than men , on the whole. This caused society to wrongly assume that because women ’ s bodies were weaker , their minds , their resolves and their spirits were probably weaker , too. As a result , schooling for women was not a priority , their opinions were discounted , they could n’t go to war , and they were not allowed a voice in politics. As a result of these attitudes , held by both sexes , men dominated the public arena , from politics to sport to media. This is called OOV It ’ s simply a term to describe a system where men control most of the power in the public OOV With 44 male presidents in a row , I think we can safely ascribe this term to the United States. The patriarchy was not unilaterally positive for men. Men were the sole OOV for their families , since women were n’t allowed to work. They needed to be financially and professionally successful - that ’ s a lot of OOV They were n’t supposed to be vulnerable , since women were seen as emotionally weak and needed a man to guide them. They needed to be strong , even if they were falling apart inside ( and we still see this today , with higher suicide rates for men. I would argue this centuries-old attitude that men should be able to fend for themselves is also why we see fewer men in shelters for homelessness and DV ) . Some time later , we ’ ve moved past these outdated ideas about which gender is smarter or emotionally OOV We acknowledge that women can be politicians and CEOs and OOV , men can be OOV and cry watching sad OOV But the remnants of the patriarchy are still there. They still make us think that there ’ s only one right way to be a woman ( submissive , nurturing and pleasant ) and one right way to be a man ( strong , rich and stable ) . They still make us see women as victims and men as OOV The more that we can do to break down these societal expectations and assumptions - whether you want to do it under the banner of feminism or not ( and obviously you do n’t , and that ’ s fine ) - the better off everyone will be. When the cops show up at your door after your girlfriend tried to stab you , centuries of cultural expectations and social history make them see a vulnerable , weak woman and an aggressive , powerful man , even though that ’ s not the reality of the situation. That ’ s why the example you gave above is a symptom of the patriarchy .

#### 680\_ah\_t1.cvt1xmu.json (ah-ah)

(OOV\_comment\_begin) If you cant figure that out , The cringe is real. xD

(OOV\_comment\_begin) Because I hold positions you disagree with ?

(OOV\_comment\_begin) Wait 50 years , then you ’ ll be considered as psychotic as the people who think being gay is a mental OOV i 3

#### 1183\_ah\_t1.dbz6ycy.json (ah-ah)

(OOV\_comment\_begin) This argument is terrible .

(OOV\_comment\_begin) Yer , OOV Thanks for that amazing OOV You really provided an interesting and invigorating OOV Go away ...

(OOV\_comment\_begin) There is a general consensus on moral parameters set within our society. Many are comfortable deviating to an acceptable degree so long as others are not OOV Be that an open relationship or a do n’t ask or tell relationship concerning OOV But in the case where there is potential for harm , only a coward hides it. If a man steals from a store , are you not required by societal set moral parameters to inform the clerk ? Or do you just assume they may have an agreement in which he can leave with the goods so it ’ s all fine to keep to yourself ? Long story short , in the instance where you are hiding what is potentially harmful , you are to speak up about it. Both your responses were shortsighted and not very well thought out. Calling him the “ moral police ” is n’t an OOV It is an insult to proper OOV I felt my response deserved as much effort as yours .

#### 441\_ah\_t1.dfmk6cf.json (ah-ah)

(OOV\_comment\_begin) OOV # Furthermore , the data that your ISP OOV be selling is a drop in the bucket compared to what is already being sold out there. [ Your credit card company , mobile phone company , supermarket , and tons of other companies you ’ ve never heard ] ( http : OOV ) of are already selling THOUSANDS of data points worth of your online AND offline data. # This data is far more intrusive than anything your ISP could ever get its hands on and includes [ stuff like

income , home value , mortgage amount , occupation , ethnicity , etc. ] ( http : OOV ) # I worked as a senior data analyst in the advertising industry for 6 years and frequently purchased and worked with this nefarious “ data ” that everybody is talking about. The truth of the matter is , this has been going on for years and years , and all of your online AND offline activity is already well documented and being sold and traded without your knowledge or OOV # 1 ) Firstly , and most importantly , all data sold about you is , by law , not personally OOV And even if it was , the people who are buying it do n’t care about you. # [ None of the data sold can legally contain any personal information about you ] ( http : OOV ) # For example , I can purchase data from Nielsen ( that they buy from Facebook ) and determine that User # OOV is a 27 year old single male who drives a Ford , enjoys cooking , and collects stamps and OOV I can then match this with data that I purchase from Experian to determine that the same user purchases Crest toothpaste , OOV condoms , Hershey s chocolate , and OOV yogurt 3 times a month , but mostly on OOV # However , I have no idea who that user is , nor do I care. # My goal , as an advertiser who buys this data , is to learn more about the behaviors of my target audience ( Males 18-34 , Females 18-49 , etc. ) . For example , if I ’m Ford , and I ’m designing a car to sell to adventurous young adult males , should I advertise on Huffington Post , OOV , Yahoo , reddit , or on a milk carton ? Put bluntly , I don t give a shit about YOU OOV # 2 ) [ Facebook , Google , Apple , Microsoft , and lots of other companies have already been selling your data for years. ] ( http : OOV ) For example , one of the most popular sellers of your “ data ” is Nielsen , which purchases a lot of it ’s info from OOV If you are logged into Facebook , [ they are tracking all of your web activity , even if you do n’t have a Facebook window open. ] ( http : OOV ) All of this is sold to OOV # 3 ) Your grocery store card ? It ’s used to collect your data , which is sold and used to target you with OOV [ This data can then be used to track even more of your offline behavior by anonymously matching your Visa card in other places you use it. ) ] ( https : OOV ) # 4 ) Credit companies like Experian already have THOUSANDS of data points about you , and are selling it actively without your knowledge # These companies know your age , gender , home ownership , marital status , favorite brand of toothpaste , credit situation , purchase data , and even your purchasing patterns , styles , and OOV They are n’t hiding it at all , and sell it very OOV # [ A company called OOV , for example , has a database of 500 million users worldwide with up to 1,500 data points on EACH OOV ] ( http : OOV ) # I did n’t even know that there are 1,500 things about me that could be OOV But there are. And it ’s all being OOV As you can see , any data that my ISP could sell about me pales in comparison with what ’s already out there. # Conclusion : To play Devil ’s Advocate , none of these other companies that sell your data are subject to such stringent OOV Why should ISPs be held to a different standard ? After working with this data , I see how complete benign it is , and think that most of the media attention is a lot of something over nothing. # Privacy is rightfully an extremely sensitive social issue , and politicians know that they can use stuff like this as ammo against the other side , whether it ’s warranted or not. I think some of that is at play here. tl ; dr , this is n’t remotely as big a deal as people are pretending it is. The rule change that was stopped from going into place were needlessly restrictive on ISPs , especially considering that no similar industry is affected despite also selling the same data. The purpose of this is n’t to OOV points ’ for Trump , it ’s to remove unfair , prohibitive , and quite frankly discriminatory restrictions against OOV Democrats are making an issue of it to score easy political points. That ’s all .

(OOV\_comment\_begin) You ’re kidding , right ? OOV ” So what ’s it matter that another privacy killing bill is coming into existence , they already sell your stuff ! ” Is that seriously your attitude ? ” Who cares if a few more Americans die today ? We lost thousands in 9/11 ! People die every day , and in much worse ways. ” Your complacency is OOV Always fight to maintain our OOV Remember , it ’s not the one straw that breaks a camel ’s back , it ’s the weight of OOV the OOV We have to constantly fight for our OOV This is not a very Republican , loyal , or patriotic stance of you. This is purely big business and big government. OOV So whats to keep my car insurance company from raising my rates because I googled “ what is the legal alcohol limit while driving ? ” Or my health insurance OOV because I google “ How to quit smoking ” ? What if colleges go through databases of histories looking for key words , and alter their acceptance policy on that ? It ’s an endless possibility of ways to get OOV OOV I voluntarily sign up for OOV I do n’t pay them money. I get a service. I can cancel at any time and still can be OOV I OOV to use my local OOV I OOV pay them money. If I cancel , I do n’t have internet anymore. Their business practices and customer service is OOV They do n’t fucking deserve access to my browser history. Surely you see a difference. OOV I do n’t OOV to have a grocery card. I also do n’t pay money for it. Losing it will hardly matter to me one bit. I ca n’t say the same about OOV OOV OOV This is your whole rebuttal ? That other companies already have our info ? Let me ask you three questions : 1 ) Does this bill improve your way of life in any way ? 2 ) Do you think it ’s beneficial to our livelihood for OOV companies to have access to your personal data , with the ability to sell it to anyone who wants to buy it ? 3 ) Why is it beneficial to include the clause that it can not be reversed ? Who does that benefit ? Because saying “ it ’s not a big deal , plenty of companies do that ” is not convincing to me one bit . (OOV\_comment\_begin) OOV I honestly have no desire to get into an argument regarding privacy rights and that ’s not the point of the comment anyway. If we actually cared about privacy we ’d be talking about the Vault 7 OOV You said you believed Republicans did this in order to throw something to Trump to repeal for brownie points. I explained why the Republicans have every intention of going through with this .

## 54\_ah\_t1\_daetigw.json (ah-ah)

(OOV\_comment\_begin) This has nothing to do with my post. My post is about how the media treats two unequal things as OOV Not why people voted for OOV There is a difference between what will convince voters

, and what is rhetorically sound .

(OOV\_comment\_begin) It actually has everything to do with it , because we can tell you 're upset anyone could support him because you think you 're smarter , while not seeing past into the core of the issue. We have all been told that everything is okay while there are very real troubling issues out there .

(OOV\_comment\_begin) Debate me with logic , not accusations and ad OOV attacks .

## 20\_ah\_t1\_d2tr7sn.json (ah-ah)

(OOV\_comment\_begin) OOV You as a layperson should not have any input into what medical professionals determine triage procedure to be. They have oversight by medical professionals who know what they are doing. Trust that training. OOV Yes , surgeons are a finite OOV They are also free human beings , not slaves or robots and you have absolutely no right to dictate what they choose to specialize in. OOV To attempt to is OOV As to OOV Once again that is covered in the triage system. I am caught up on your arguments , they have no merit .

(OOV\_comment\_begin) You did n't read the initial statement , stop wasting my time .

(OOV\_comment\_begin) I have read all OOV I am not waiting your time. You want to eliminate an entire specialization of OOV You are wanting to dictate what surgeons are allowed to specialize in. That is not acceptable .

## 450\_ah\_t1\_d1ly2mf.json (ah-ah)

(OOV\_comment\_begin) OOV I 'd appreciate it if you 'd refrain from using sexist stereotypes like this .

(OOV\_comment\_begin) Good for you ?

(OOV\_comment\_begin) I 'm not sure what you mean with this response .

## 606\_ah\_t1\_dihjmm3.json (ah-ah)

(OOV\_comment\_begin) It 's an opinion OOV Blog is right in the OOV OOV No community college would accept that as a source in a freshman research paper. There is no editorial OOV It 's infotainment plain and simple ; which is supposed to get people riled up with OOV That said , we all saw how much editorial oversight the NYT in the run-up to the Iraq war ; even in their actual news OOV If you ca n't find legitimate sources of information to back up your claims , that should tell you something about your views .

(OOV\_comment\_begin) You have fixated your refusal to consider the source because the word " blog " is in the URL ? The author of the piece is a Pulitzer Prize winning journalist and former bureau chief of the Washington OOV The OOV was a section of the NYT devoted to sharing technical & graphical information to develop discussion around important issues , like economics and race. READ before you OOV Your OOV - like how you flatly stated you do n't believe whiteness confers any privilege and then challenge the URL of a source - is a huge red flag to me. Especially in a subreddit devoted to changing one 's view. Why are you here if not to educate yourself and consider you might be missing some important perspective that could undermine your take on things ? I enjoy changing my mind. I enjoy challenging my own OOV That 's why I 'm here. To find out where I may be wrong and if my opinions are worth backing up. If your here to change your view or mine I 'll happily engage but I do n't get the sense we are after the same thing .

(OOV\_comment\_begin) OOV Then why are you unable to find support for your claims in the actual research ? Winning a Pulitzer does n't mean that everything you spill on to a page is OOV OOV It 's a blog. It makes no secret of that. OOV Blogs are not legitimate research. That is standard. The fact that you are relying so heavily on this one blog post says a lot about your OOV OOV I do n't see any legitimate evidence that it does. OOV I challenged the legitimacy of a blog as evidence. I only pointed to the URL when you tried to claim that it was n't a blog. OOV An open mind does not equal a blank mind. Blogs are n't legitimate sources for the kind of claims you are trying to make.

OOV I still believe that you might be able to make your case with legitimate sources if you were willing to make the  
OOV OOV So do I , but I 'm not going to start swallowing infotainment blog posts over it .

#### 1061\_ah\_t1\_cu49own.json (ah-ah)

(OOV\_comment\_begin) They are things. Biological things. You can change your gender , you can even change your  
OOV sex , but without future advancements in genetic therapy , you ca n't change your biological sex. OP is right in  
that much , at OOV The only exceptions are rare genetic diseases where someone may have a defective chromosome  
, additional chromosome , etc ... that influences them to be a " OOV " OOV Unfortunately , there 's no such  
thing as a true OOV , so most end up as a mutated version of one gender with secondary characteristics ( even  
some primary ) from the alternate .

(OOV\_comment\_begin) no they 're not. if you take a car , replace the body , wheels , controls and radio with those  
of a tank , does not mean it is " biologically a car " .

(OOV\_comment\_begin) And if you could take a OOV , replace their primary sexual characteristics , secondary sexual  
characteristics , hormones , OOV OOV , and all other inborn identifiers , they would no longer be biologically a OOV  
Hell , with enough surgery and future advancements in gene therapy , you could be biologically a golden retriever  
for all it matters. But we ca n't do that at present .

#### 596\_ah\_t1\_dbuuu0a.json (ah-ah)

(OOV\_comment\_begin) [ Russian researchers demonstrated that behavior is genetic and can be drastically altered with  
a mere 6 generations of controlled OOV ] ( https : OOV )

(OOV\_comment\_begin) Again , way out of OOV What does this have to do with race and intelligence ? Yes  
, genes influence behavior , and a multitude of other things. How they influence behavior and other traits depends on  
their interaction with other genes and environmental OOV That is exactly what this study is evidence of. The genetic  
component of two friendly parents passing their traits to their offspring , and a multitude of environmental components  
involved with being raised by humans is how dogs became domesticated .

(OOV\_comment\_begin) There were no environmental factors in the domestic fox OOV It was all OOV What  
this has to do with intelligence is that [ IQ is 75 % OOV ] ( https : OOV )

#### 110\_ah\_t1\_d3yweqv.json (ah-ah)

(OOV\_comment\_begin) To answer your question , both. Knowing there is finally a candidate who genuinely wants to help  
my country does make me feel better. Now go read the fucking OOV I hope Hillary does win the Democratic nomination  
though. All the pissed off OOV are going to be pretty angry at Hillary for stealing the election from their candidate , I  
expect the general election to be a Trump OOV Even the OOV know she is a sell out political OOV If they do n't refuse to  
vote , most of them will probably vote for Trump out of spite .

(OOV\_comment\_begin) How is he try to help you ? Just his words. Him saying that everything will get better if you vote  
for me ? That 's just OOV he is telling you what you want to hear and you are lining up behind him. Bernie , seeing Trump  
as the direct opposite to his legacy , will make a speech to his supporters OOV Trump as the vile man that he is and he  
will tell them to support OOV If he chooses not to do that then his movement will be worthless as Trump will simply undo  
everything he stands for. The electorate math is going to very hard for OOV He is running out of angry white men to vote  
fro him. The Latino vote is going to be actively against him. The female vote will fall to OOV Clinton has still been going  
against Bernie while Trump has been in the OOV She will now focus on all of Trump 's short comings , and there are lots  
of OOV When an idiot says things on his Twitter feed there is lots of material to use against him. And when Trump says  
racist things about Mexican American judges that 's not exactly inviting the Latino voters to support him. You can predict  
anything you want to happen , but reality will probably be much different then your hopeful fantasies .

(OOV\_comment\_begin) OOV this is what Clinton supporters actually believe .



## 262\_ah\_t1\_da1r78m.json (ah-ah)

(OOV\_comment\_begin) My complaint is that people seeking gender equity for men are increasingly laughed out of the room by contemporary feminists as if men have nothing to complain about. OOV I was referring explicitly to affirmative action in hiring and appointments .

(OOV\_comment\_begin) OOV This is because the “ gender equality ” men seek IS laughable and fucking OOV It ’s literally fedora lords whining about being OOV or never getting laid cause they ca n’t see that being rude and harassing women turns them off. Now , if men wan na talk about unfair shit men face in society , they should realize feminism agrees that these are unfair symptoms of OOV values that oppress them as they oppress women. Men need to realize feminists want to abolish the same culture that OOV them both. But instead , men wan na make everything about them and act like they need their own movement when , in reality , they suffer from patriarchy just like women do. They need the same movement. I mean , I do n’t mean to sound hostile but when you say “ women OOV at men ” it ’s because of shit like this : this is the five OOV conversation about this topic I ’m struggling to be nice on. After thousands of efforts to try to “ educate ” men on this shit , they stubbornly plug their ears and go “ NO ! IT ’S THE WOMEN ’S OOV I CA N’T GET OOV CAUSE I ’M SHORT ! ! ! ! ! ” Like , fuck off then. I ’m not gon na tell you nicely anymore. I ’m gon na mock you because you fucking deserve it. So yea , in a need to rant , I am trying to explain why , in general , marginalized groups resort to name calling instead of “ educating ” people. We HAVE been OOV We HAVE been nice and holding your hands and showing you studies and essays and historical examples and statistics and graphs ... no one fucking cares to listen , so ya know what ? We throw up our hands and just go “ fuck it , let ’s call him a OOV caked king of the OOV ” because we ’re tired of spending hours of emotional energy patiently explaining shit just to get blamed at the end of it all for shit we just fucking OOV is not our fault , that we HAVE a common enemy , that we can have solidarity ! Ugh , anyway. Yea , like , you even just said “ well , it COULD be both , but I definitely think there is a systemic barrier erected by women to keep men from entering the field ... ” You have had so many thoughtful and OOV comments explaining how ludicrous that fucking is. In what universe do women benefit from OOV an industry that has a fucking income cap of like , 20 dollars an hour ? ! ? ! ? ! ? If it was to brain wash children into OOV , go to any middle school. Young boys are fucking vile on the OOV Seriously , how can you say “ I ’m sure it is a bit of both. ” You have been TOLD why it ’s a patriarchal expectation for men to avoid these roles and you STILL go “ OOV , maybe , but it ’s probably a fucking conspiracy to keep men out of a job that pays OOV ” AGAIN , I ’m sorry to be salty , but if you do n’t get it by now , you OOV This is why feminists OOV at men. There are so many great comments above and you persist in believing women have a weird systemic monopoly on teaching , of all the fucking jobs. To believe that is to inherently misunderstand how power works. Would you say there is a systemic barrier to keeping whites out of restaurant kitchen jobs ? ? ! ! ? ! ? I really do n’t want to sound condescending but , shit , I could n’t not respond with a vitriolic essay after “ I ’m sure it is a bit of both. ” I just OOV It is physically exhausting watching people cling to shitty beliefs after mountains of information is dumped on them and then they go “ why do they laugh at us ? ” Imagine spending your entire college career perfecting a persuasive argument that the obviously green grass on your campus is green and then at the end of an hour long presentation filled with informative slides , graphs , excerpts from authorities on both COLOR and OOV , your professor goes “ OOV ... . I just do n’t think so. ” You would lose your mind and probably call him a bunch of nasty stuff. That ’s why feminists OOV at men. Congrats if you made it through all of this. I sincerely applaud you .

(OOV\_comment\_begin) Yeah , this is the sort of divisive , intolerant , stereotyping hogwash I ’m saying is OOV Thanks for coming out though. Now the rest of us have an example of exactly the shit I ’m OOV I guess that makes me a fedora lord , right ?

## 546\_ah\_t1\_de9zu5i.json (ah-ah)

(OOV\_comment\_begin) OOV Based upon this list of OOV , I ’m going to say that you ’ve confused hatred of women with disagreeing with the feminist OOV OOV OOV women .

(OOV\_comment\_begin) No. I just do n’t like it when people , on any sub , post a video of a guy hitting a woman because she called him a shit head , with hundreds of comments commending the man and calling it equal rights .

(OOV\_comment\_begin) OOV Can you post a link to the posting of this video , because my guess is that you ’ve either misinterpreted it , or misrepresented it. A video of a man hitting a woman ( or anyone hitting anyone ) because they called them a shit head would get soundly condemned and OOV on OOV A video of a man defending himself against a woman who physically attacked him would receive a significant amount of support ( and some condemnation ) on OOV



That 's not misogyny , that 's equality .

## 2 False positives (Type I error) (delta as AH) 24

### 619\_delta\_t1\_dlej1g7.json (delta-ah)

(OOV\_comment\_begin) OOV Are you saying that OOV are completely useless medically ? That people can just resolve their depression with force of will or being convinced of things ? That seems to run in opposition to OOV I 'm not saying that you can just take a pill and your depression will go away , but it 's pretty clear that without medicine , there are plenty of times where you wo n't be able to just " get over it " . OOV It can be. But that does n't mean your identity is intrinsically tied to your natal sex. You could say it 's an important part of many trans people 's identity because they do in fact wish to be the opposite sex , and take measures that best give that OOV I was probably a bit wrong to say people do n't refer to sex. They might sometimes , just not in the static way you are .

(OOV\_comment\_begin) OOV No , I 'm claiming that anti-depressants are only temporary distractions from the real problem. Which is exactly what I believe this whole pronoun issue is. It 's just a temporary OOV from the real problem.

OOV people are people who are uncomfortable with who they are on a deep psychological level. Hearing a stranger call them he/she is n't going to help. It 's only going to feel better temporarily .

(OOV\_comment\_begin) OOV " OOV " is a questionable word here. They help mitigate debilitating symptoms so someone can work towards overall improvement of their condition. Their role is not interchangeable with OOV OOV OOV Are you of the impression that transition does n't exist to address this problem ? OOV https : OOV https : OOV http : OOV % OOV % OOV Having your identity recognized and affirmed helps .

### 724\_delta\_t1\_dj04ggb.json (delta-ah)

(OOV\_comment\_begin) I thought you were arguing that the US would still exist whether it was alone or the Vatican existed , and I am arguing it would n't in either case .

(OOV\_comment\_begin) No , I am arguing that the Vatican should not make any difference either way .

(OOV\_comment\_begin) OOV Then what did you mean by this ?

### 56\_delta\_t1\_d9v09vn.json (delta-ah)

(OOV\_comment\_begin) The voters are culpable for what is known at the time of OOV Put rather bluntly , these examples are not OOV With regards to clinton , I am willing to accept culpability for supporting her despite what I regard as a stupid and careless OOV You may disagree that this is the underlying cause ( e.g. you may think it 's a conspiracy or she intended OOV national security , but ... I do not believe this ) . If you do n't think that trump is a misogynist then ... well ... I 'll give you a pass too. But , then I 'll think you 're kinda naive : )

(OOV\_comment\_begin) The exact numbers were not known , but the actions OOV The information has been out there for anyone that cares about it .

(OOV\_comment\_begin) Thats OOV Valid point. I guess I have a problem with intent here. We do n't claim for a second that Obama 's effort is OOV to do more good than OOV He is at least very aware that his choice comes with a heavy cost. I grant the same to George OOV I do indeed question OOV judgment on this ! However , I do see some OOV OOV with this use of force in this manner despite thinking it 's the wrong OOV Obama 's actions arise from an objective we share ( e.g. security , getting terrorist targets without risking american lives , etc. ) . I believe I 'm voting for that shared objective , shared worldview and that his OOV show poor OOV What is the positive , OOV , " fundamental " that we see in Trump 's " grab her in the pussy " or devoting thousands of hours to beauty pageants ? How do we find the fundamental behind these disagreeable actions that we do actually agree with ? If I ca n't find one then I do think I should regress to culpability for supporting the action itself .

### 393\_delta\_t1\_caxokck.json (delta-ah)

(OOV\_comment\_begin) OOV Yes OOV not all marriages end with hate you know. If it does I suggest you move out OOV OOV move in ? OOV Perhaps not rushing will help ? OOV Thats what a OOV is. OOV [ OOV ] ( http : OOV ) Also the situation you desire is completely available to everyone already. YOU ARE THE ONLY PERSON WHO HAS TO OOV YOURSELF AS MARRIED IN ORDER TO BE OOV Plenty of gay couples are

married but want it to be recognized by the government. You do n't have to sign up for a marriage license if you do n't want to .

(OOV\_comment\_begin) ... and after that string : to that man !

(OOV\_comment\_begin) ooh thanks !

### 876\_delta\_t1\_cpi27eq.json (delta-ah)

(OOV\_comment\_begin) Depends on the area. If s/he 's a civil engineer , perhaps its the opportunity to OOV a new bridge or OOV If s/he 's a software engineer , probably not much , at least not right away. However , it 's important to remember that careers are n't OOV Just because that software engineer does n't go back to his country right away does n't mean he never will. Perhaps after 15+ years of experiencing working with a company s/he has the opportunity to head a project back in their home country , or s/he gets a job teaching at a OOV Maybe s/he is one of a handful that seeds a new industry in their country. I work at a university in a developing country , and many professors , especially older ones , got their PhDs and Masters OOV Now , there are more and more Masters and PhD programs in those fields available in this country , but they would n't be available today if it had n't been for globalization .

(OOV\_comment\_begin) OOV Can you find me some proof that this is a sign of prosperity , rather than “ not falling further behind ” ?

(OOV\_comment\_begin) I live in Chile , and there are two options that A quick google search of “ Best Universities in India ” rendered these results : [ http : OOV ] ( http : OOV ) and [ here ] ( http : OOV ) Notice how many of the universities on that list are called “ Indian Institute of Technology ” ( or IIT ) , Medical and science schools. I went a bit deeper and looked at IIT Bombay website. I chose a random department [ OOV ] ( http : OOV ) , and clicked on the [ faculty page ] ( http : OOV ) . One this you 'll notice is if you click on any guy with gray hair , or looks like he 's over 40 , he got at least some of his education in the OOV ( or at the very least , some work experience ) , Like [ this guy ] ( http : OOV ) , [ this fellow ] ( http : OOV ) or [ this fine gentleman ] ( http : OOV ) . The younger guys are kind of hit or miss , but that just illustrates my point. The older generation helped elevate the universities to a high level , meaning students do n't OOV to go abroad to get a high quality education in India anymore , and higher ed is more accessible to more Indians .

### 655\_delta\_t1\_dcg50qp.json (delta-ah)

(OOV\_comment\_begin) [ This ] ( https : OOV ? OOV ) large ( N ĩ OOV ) and recent ( 2016 ) study provides evidence that most people do in fact OOV their beliefs according to new evidence , even if it goes against prior partisan OOV Quoted from the abstract : ” By and large , citizens heed factual information , even when such information challenges their partisan and ideological OOV ” If this does n't change your view , the authors might be interested in contacting you .

(OOV\_comment\_begin) That paper is missing something very important : peer review. Also , the claim that the only topic where the backfire effect did reproduce was the very same issue that OOV ( 2010 ) studied WMDs in Iraq seems very strange to me. To clarify the issue , I 'd have to read through a OOV OOV article , and I do n't really have the time for that right now. OOV This is basically rhetoric , so I 'm ignoring it .

(OOV\_comment\_begin) It 's peer-reviewed : it was presented at American Political Science OOV And I think you 're missing the forest for the tree ; people , OOV , are open to changing their view on a very broad range of OOV OOV There 's empirical evidence for it. You do n't have to read it all ; here 's a more OOV news article written about the article : http : OOV This NYTimes article from a researcher in political scientist is also good : [ OOV Can Change Views ? We Rate That as Mostly True ] ( https : OOV ) : “ However , other research we have done suggests that fact-checking can be OOV ” The last bit was a joke , but it does n't negate my thesis .

### 286\_delta\_t1\_dm6fz6d.json (delta-ah)

(OOV\_comment\_begin) It 's not considered normal and is widely considered a OOV I 've worked with the transportation department quite a bit with my career and this is never allowed .

(OOV\_comment\_begin) Could you expand on that a bit ? Which state was this in , and does there exist a law that clearly covers this behavior as not allowed ?

(OOV\_comment\_begin) This was two large cities in OOV A person ca n't claim a spot unless they are actively parking their car in it. If a person stands in it they still do n't have claim to it and I 've seen police actively remove people doing this. Especially at events .

### 1209\_delta\_t1\_d8ycffo.json (delta-ah)

(OOV\_comment\_begin) Probably a waste of my time to reply to this but I 'll give it a shot. There are evil people in all OOV That 's the nature of OOV White people evolved from black people after leaving OOV The white people now lived in a land that was rich in resources , easier to survive , easier to form OOV So of course this group was the one to dominate the others. If black people had the resources that white people had , I can guarantee they 'd be the ones conquering white people. Skin tone does not make people evil. People are evil and the white group happened to have the best resources. Not to mention , black people have had black slaves ( in fact , many African slaves transported to the west were OOV by rival BLACK groups , and sold to the western world. If you look into the history of ANY group of people , it will have tons of negative OOV You just happened to look into the American OOV And with the Jim crow research you 've done , you should have learned that it 's really RICH people who created racial problems between poor whites and poor blacks .

(OOV\_comment\_begin) I did not say that all races did not have evil or that all white people are evil but regardless of speculation that if OOV that the value of x is OOV the point is white people had the resources and we already know what they did , If past behavior predicts future behavior ... is history going to repeat itself. Well I looked at american whites because it is the most relevant to me. I 'm pretty sure the majority of slaves captured were n't done by OOV Yeah , Rich white people ... coming full circle on my evil thoughts .

(OOV\_comment\_begin) I know , I did n't insinuate that you did. But if you 're singling out whites as evil , you should realize that that is just human nature. Most humans were " evil " before modern society. Whites happened to have the best resources. You admit you only looked at america , I suggest you do research on other continents so you can see that it 's not just white people. It 's people. And yes , most African slaves transported to the west were captured by other OOV You better believe the rich Europeans were not going into the harsh continent of Africa to get their own OOV They were buying them from other OOV .

### 1180\_delta\_t1\_d6yypr9.json (delta-ah)

(OOV\_comment\_begin) We live in a OOV Am I a part of a revenge war ?

(OOV\_comment\_begin) The statement of the U.S being a patriarchy is not inherently offensive or dismissive in any way , simply stating a fact and/or opinion. If one were to say OOV the patriarchy because men are useless ' , that would be a comment I view as OOV .

(OOV\_comment\_begin) So when you say " modern feminism " , you 're actually talking about a subset of assholes ? Why rope the ideology into this ?

### 45\_delta\_t1\_d0d0z82.json (delta-ah)

(OOV\_comment\_begin) OOV No that 's not my argument , you brought up Rihanna and others as an example of light skin black women having succeeded , I brought up Oprah to counter that. You haven ' given me any examples for my initial question. Do you have any examples of women who had gone through this procedure and succeeded in turning around

their romantic life. Because if not then you have no **factual** basis of going through this yourself. At best it will result in you **wasting** your money unnecessarily and at **worst** you may get into **medical** **OOV** My **point** is **do** **n't** do this procedure if you can't even come up with examples of it's **success** .

(OOV\_comment\_begin) **Okay** , **I** agree with this. There is no data to show it. There is data that shows if you keep your pictures on online data and simply say you are mixed with white , the amount of messages you 'll receive goes up. So , being at least , **thought** of as close to white is **better** .

(OOV\_comment\_begin) **OOV** This may be a societal problem that 's not solved by bleaching your **OOV** Have I changed your view about that ?

### 179\_delta\_t1\_dchjfd.json (delta-ah)

(OOV\_comment\_begin) **So** , to **be** clear : **Are** you **worried** they **wo** **n't** accept you , **like** it says at the end of your **OP** , or are you **worried** they 'll be physically violent against you ? If the latter , how do you protect yourself from being attacked by acquaintances **normally** ?

(OOV\_comment\_begin) **Id** say my concerns are about **OOV** As for your **second** **question** , **Ive** learned to **casually** mention a **gay** related issue and judge their **reaction**

(OOV\_comment\_begin) **Why** **would** that same rule not apply with someone from the **middle** **east** ? **Being** a **queer** **dude** in the **US** can be **dangerous** sometimes , **I** know. You learn how to drop hints and to back off and remove yourself from the **situation** if necessary. **So** ... why open yourself up to so many false negatives by **assuming** ethnicity has anything to do with **anything** ? **Just** pay attention to the signs you already pay attention to .

### 1030\_delta\_t1\_d6t6txv.json (delta-ah)

(OOV\_comment\_begin) **No** , its huge **risk** and **OOV** **reward** at **best**. **What** do you **think** industry wise will be happening on a " small island " as you described **it**. **Why** take this **risk** if they can get and are getting rich in the **system** **atm** ?

(OOV\_comment\_begin) **I** do **n't** **think** such a nation **would** trouble itself with industry. **It** **would** be better of with focusing on financial services , technological R & D and entertainment .

(OOV\_comment\_begin) They would get copied instantly and **cant** do **shit** as they are **OOV** , right ? How do you deal with the stuff you **invent** if you **dont** enforce **patents** ? You wont make money from it .

### 700\_delta\_t1\_daxhgh.json (delta-ah)

(OOV\_comment\_begin) The **U.S.** already **spends** more on the military then the next 7 largest **spenders** **OOV** We out gun , out train , out **maneuver** **everyone** else on the **OOV** We **spend** so much money , that the Pentagon has actually told congress to stop buying things our military does not need. We already **spend** **far** more **than** enough. **But** more importantly : The **battles** we **fight** from here on out are **n't** **battles** that more money on weapons and soldiers is going to help with. **That** money needs to be spent on diplomacy , infrastructure building here and abroad , and investing troublesome regions to avoid violence in the first place. You 've mentioned **Russia** and **China**. **If** it actually came down to exchanging rounds with either of those countries , the world is **toast** anyway. The **battle** we 're **fighting** right now is to prevent it from getting to that point in the first place .

(OOV\_comment\_begin) Can you **elaborate** your other **investments** **argument** ? Should we increase spending to better deter a " world **war** " ?

(OOV\_comment\_begin) **OOV** **Maybe** ? **Given** that if we actually did engage in any kind of full **scale** **war** at **this** **point** it **would** mean the end of most life on earth , and coupled with the **fact** that the kind of smaller scale wars we are currently engaged in can largely be cut off at the source by providing the potential terrorists of tomorrow with

the education , resources , and stable governments that make terrorism seem less like a good way to get your message across we 'd be much better off investing money into those things instead of continuing to build 10 times as many fighter planes , tanks , guns , and battleships as everyone else. We could dial it back to 5 times as many weapons as all other super powers combined , still be top dog with a big dick , and work towards preventing any need to use all our fancy death OOV OOV On the military ? No. We already spend so much that literally no country could stand against us unless they were willing to go OOV Spending more will have no positive effect .

#### 1175\_delta\_t1.d0q00rx.json (delta-ah)

(OOV\_comment\_begin) OOV What do you mean ? He literally said it in his announcement for OOV [ I quote ] ( https : OOV ) : OOV I do n't understand how you could deny he said this. No one is projecting anything - he said the exact statement in a public speech. Calling immigrants rapists is not " an ambiguous statement regarding potential OOV " Please do n't take this the wrong way , but if you 're not willing to acknowledge basic facts about Trump , I 'm not sure you 're willing to have your mind changed about him. I hope I 'm wrong about that , though. OOV Let me explain it from a different perspective ( rather than repeat the same point in different words ) : Bernie Sanders has made it normal to talk about socialism in national politics. This is significant because before his campaign , it was anathema to even mention the word socialism , much less wear it as a badge of OOV By repeatedly advocating for policies identified as socialist , and repeatedly bringing it up and defending it , Sanders has shifted what is acceptable to talk about in politics so that socialism is now fair game. Trump has done something remarkably similar with OOV By repeatedly making comments that are easily construed as racist , by repeatedly supporting policies that disproportionately affect people of certain races and ethnicities ( build a wall and make Mexico pay for it , make a database of all Muslims , deport all refugees , etc. ) , Trump has made it acceptable for politicians at the national level to be OOV Note that it does n't matter how many excuses you come up with for why he does n't OOV believe statement X , or why statement Y was distorted by the " liberal media. " None of those excuses change the fact that his statements have made it much more acceptable to say racist things and support racist OOV And he knows this. He intended this. He wants to make racism OK because it makes it easier for his racist supporters to rally behind him. Because of his " theatrical " campaign , we do n't know any of his personal OOV But we do know that he 's so OK with racism that he 's willing to normalize it to gain more OOV He 's so fine with making racism more normal that he 'll use it as a campaign strategy. That 's OOV Really , really racist .

(OOV\_comment\_begin) OOV But the data cited in the OOV article appears to confirm that some illegal immigrants from Mexico are rapists and some are good people. The article also seems to exclude the number of unauthorized aliens deported in its total OOV In any case , it 's obvious his quoted statement is flexible enough to attach any distracting agenda to ( as is frequently done ) but the underlying issue is not about race , it 's that " a nation without borders or laws is not a nation " . OOV You say Sanders has made it acceptable to OOV socialism , but Trump has made it acceptable to OOV OOV It 's not like he has conjured up a new racist segment of society , whatever elements choose to support him - even for the wrong reasons - already OOV If anything , has n't Trump just made it more acceptable to OOV racism , which should be a positive ? A country will never solve its problems without being able to openly talk about them. You appear to be suggesting that not immediately dismissing a viewpoint indicates some kind of tacit approval for it. I just do n't see how that holds or is productive in any way .

(OOV\_comment\_begin) Last post , in reference to his statement on Mexican immigrants , you said OOV Now , you 're agree that it OOV said. Your new justification is that his statement true , but not actually racist ? It sounds like you 're trying to defend him rather than discuss him OOV Can I ask what kind of evidence would



it take for you to change your mind about what kind of person he is ? OOV Let me rephrase it to be clearer : Sanders has made it acceptable to espouse socialist , and Trump has made it acceptable to espouse racist OOV In Sanders ' case , socialism was so taboo that it was difficult to even discuss it , but in Trump 's case , racism was not so taboo that it could n't be discussed ; Trump has just made it easier to argue in favor of racist ideas. OOV But they did n't have as much of a voice in politics before he OOV their OOV Imagine that a politician normalized the views of the Westboro Baptist Church to the point that it was acceptable to preach their message in public OOV It would n't matter that the politician did n't create the OOV What would matter is that this politician let them spread their toxic views much further than they would otherwise be able to. OOV No , we 've been discussing racism in this country for well over a century. Trump did n't make it more acceptable to discuss racism , he made it more acceptable to OOV OOV OOV discussions on racism do n't involve questioning whether or not we should be OOV Only fools believe that certain races are superior to others. OOV discussions center on how to deal with OOV Trump has not added to discussions on how to deal with racism because he is n't discussing the harms of racism or solutions to those OOV He 's actively supporting and proposing policies that only racists would be in favor of. When people try to call him out on these comments , he and his supporters come up with 100 reasons why he 's not OOV racist and how he was just " stirring the pot " or " asking questions " or any other justification that misses the point : his policies do not add to discussions of racism , they promote racism and give a voice to toxic people. OOV Not at all. If Trump never mentioned race or racism in any of his speeches , there would no problem. There are many issues for politicians to tackle and racism is just one of them ; not everyone needs to talk about it. But Trump has repeatedly brought race into his speeches and every time he does , his statements come off either overtly or subtly OOV He does n't have to literally say " Mexicans are inferior " for his statements to be OOV Above , you argued that since some Mexican immigrants are rapists , his statement about them being rapists is technically true. That misses the point OOV OOV culture , nationality , race , and religion contains OOV Pointing to a specific nationality and accusing them of being rapists is an attempt to incite racial OOV Thievery is OOV Every race of people is full of OOV Making the statement " black people are thieves " because OOV black people are thieves is racist because it takes a OOV issue ( thievery ) and turns it into a racial one. Trump is n't doing this by OOV He 's not clueless about race politics. He knew that by claiming Mexican immigrants are rapists , he would give racists a rallying point. He knew that news cycles would be full of people debating the issue back and forth : " OOV Mexicans rapists ? More on this at 5 " But giving two sides to a clearly one sided issue is a terrible decision. It gives toxic extremists a microphone and with the internet , an easy way to rally together. Even though 9 out of 10 people do n't believe for a second that Mexican immigrants are any more likely to be rapists than anyone else , now the news is full of 50/50 discussions on the matter. Those 1/10 racists now feel like they are part of the majority , like their views are normal and acceptable and OOV Their views are n't debatable ; we had that debate decades ago and decided to treat people OOV Pretending that this decision is still up for debate sets back civil rights because now instead of dealing with actual issues , we 're wasting all of our media attention entertaining the toxic delusions of racists .

## 272\_delta\_t1\_cus306w.json (delta-ah)

(OOV\_comment\_begin) The Manhattan project was n't high treason against the United States. You are saying that a large group of people perpetrated an attack that would be high treason and not anyone has said anything about it ? No regrets ? no deathbed confessions ? No OOV evidence leaked to OOV Does this make sense to you ?

(OOV\_comment\_begin) No , that does not make sense to me. However , that does n't negate the other points I initially brought up. For example , if they would have gone through with Operation Northwoods ?

That would be the same thing , treason , high risk , many people involved. And yet somebody proposed it. Would it have come out ? Who OOV I do n't want to open another can of worms , but the assassination of JFK is also controversial ( much more so than 9/11 ) . I know people who believe JFK 's death was a conspiracy , and nobody seems to have a problem with the ( very good ) question of how this was kept such a secret .

(OOV\_comment.begin) If You 're talking about it like it was a done deal , but it OOV It does n't really add anything to your argument because it was proposed and OOV It did n't happen You ca n't just say that something that was proposed and then rejected supports your OOV The other points you made do n't make any sense. OOV They mean something because you claim they mean something. The really do n't mean a thing on their own. You seem to have already come to your OOV I 've made valid points and you have simply responded with however or that does make sense , but ... I fail to see how this is worth my time when it seems to me that you have already made up you final OOV Good luck with this one. I 've said my piece .

#### 495\_delta.t1\_djk7zf5.json (delta-ah)

(OOV\_comment.begin) The problem with a practice like this is that circumstances change. A candidate could promise something while campaigning with every intention of doing that. However , once they take office , something happens ( war breaks out , economic downturn , etc ) that prevents them from being able to fulfill that OOV Plus , many campaign promises require the cooperation of other OOV If those other parties do n't cooperate , then you ca n't get it done .

(OOV\_comment.begin) All I 'm saying is that they should have to publicly state the reasoning for not doing it. And I 'm more concerned about when they specifically go against what they say. If war breaks out and they must change their position , they must give a detailed reasoning as to why they broke the OOV If they refuse , they get fined

(OOV\_comment.begin) If all that is required is that they give a detailed explanation , then this system would be abused OOV All they would have to do is generate some bullshit explanations , and they would be off the hook .

#### 632\_delta.t1\_d4bgpso.json (delta-ah)

(OOV\_comment.begin) You do realise that OOV views are exactly the same as the pastors your are OOV ? That some select group of people simply should n't be allowed ? You do realise that you would qualify as one in that tiny percentage of people to get OOV to " make the world a better place " ?

(OOV\_comment.begin) I would argue my views are n't the same. I 'm suggesting we get rid of people who are violent or discriminatory in the first place - I think everyone should be entitled to do and believe whatever they want unless they are directly hurting people. Why would I qualify as the small percentage ? I 've never hurt anyone in my life , and I greatly support free speech and freedom of OOV If someone wants to hate Muslims for example , I think that they have every right to. But I OOV OOV support people physically harming someone simply because of their religion .

(OOV\_comment.begin) OOV Wanting to kill off a certain group of people certainly count as hate speech and is what you are OOV This is also the very definition of inciting violence. The only difference is that the pastors want homosexuals or whatever to be murdered , while you want the pastors , among others , to be OOV OOV You are being very discriminatory here. Your entire CMV depends on discriminating a group of people with specific qualities , while also suggesting that they are nothing other than these qualities and that they can never overcome them. But , if we are to deal with the OOV problem of your suggestion , let 's run some OOV What makes a person a OOV ? Is it genetics ? Partially , violent people will have more violent kids. And those would be removed by your OOV It 's not a guarantee ofcourse , violent parents can also have calm and rational kids , and vice OOV Is it upbringing ? Partially , a shitty upbringing will lead to a life with more OOV OOV This would not be affected at all by your OOV A rapist today can range from the most violent of psychopaths , assaulting women at night and brutally OOV them. It can also be ( as with the Rolling Stones debacle ) a perfectly innocent man that did n't do anything wrong. Or perhaps it 's a man that had consensual sex with a drunk girl. Should any of those be murdered ? When do you know if a person is guilty ? When they get sentenced ? When they get OOV ? When there is insufficient evidence ? When do you know if that complex person is OOV ? When he gets committed ? When he 's cleared of mental disability ? Or is that not relevant ? What about hate ? What is hate ? Is it hate to vote for Donald Trump ? Should those people be murdered ? Who decides what hate is ? What do you think would happen if

Feminist Frequency decided the definition of hate ? What do you think would happen if IS decided ? What about if Twitter decided ? OOV ? There is no singular definition that would work , and there is no interest group that would n't try to shift that definition to include people they dislike for ideological or political reasons. Do you think Hillary would try to include Trump and his supporters ? Do you think Trump would try the same with her ? Because those are the two parties that would have the most say. What if Hillary wins this election , and sets her OOV And then next election Trump wins and changes that definition ? The reason people advocate tolerance is not because tolerance is fun and awesome , it 's because it 's the only way that works. OOV and living with the bad stuff is immensely better than going on a crusade to right all moral OOV Fewer people die , and without a crusade there 's no OOV to retaliate for all that " justice " . Look at Soviet , that is what came from demanding moral OOV The worst slaughter in human history .

#### 487\_delta\_t1\_da0cn7l.json (delta-ah)

(OOV\_comment\_begin) Comparing OOV and the US election really is n't as similar as people seem to think. OOV and pundits do so as well , but really there are only a few similarities involved. And those similarities involve anger at establishment , and populist OOV Other than that it 's two totally different ball games. Anyone telling you differently does n't really understand either situation as well as they would like you to OOV Though I doubt Trump is going to kill the gays , his racist and sexist remarks and actions are there for everyone to see. His racism has been seen throughout his career , his refusal to rent condos to black people in the 70s ( He was sued by the justice department twice ) , his discrimination of African American workers at his casinos has been recounted constantly by people interacting with him. Some of the longest stories are from people who knew him well including former OOV [ This ] ( http : OOV ) is a fairly good article from a fairly OOV source listing and going into detail on these events. His racism is n't the outright OOV racism , but rather an ignorance and bombastic rudeness based in stereotype and cheap OOV It 's what passes among teenagers and they are expected to grow out of. As for his OOV Well his actions once again show him as a pretty rude and crass man. His [ talk of women ] ( http : OOV ) has been rude and derogatory for years but his actions really shine out. Namely his actions surrounding the [ OOV Universe ] ( http : OOV ) OOV Ill quote him directly OOV Now this has been backed up as happening by contestants who all described it with shock and really said how horrid it was. So racist and sexist , you can judge a man by his actions and Trump has certainly had a lot to judge him OOV Mainly you can look at him and see his actions as self OOV by putting other people down , and actions of selfish indulgence for the sheer joy of it. Now he probably does this to everyone , but can his actions be construed as sexist and OOV Well he has a long storied carrier of it , and the defense of " I 'm an equal opportunity hater " does n't mean his hate was n't racist or OOV I do n't use those words easily or lightly either , I think we all have moments where we do or say prejudiced things , but Trump has gone beyond just prejudice multiple times .

(OOV\_comment\_begin) I do n't think the issues are that OOV It just so happens at the end of each I 'm pro OOV and more in favour of Trump whereas they 're pro Remain and OOV favour of Hillary 'the OOV That is the only similarity I draw between the two. I asked someone early how big a role would Trump have played in renting the condos ? I have heard that black dealers would be taken off the table at the request of big OOV This appears more to be OOV of customers than racism , I would say the customer is racist and the OOV is following the idea of the customer is always right. Going through the linked article his OOV on Mexican rapists has always appeared to me as talking about illegal immigrants and given a rapist ca n't legally enter the USA an illegal immigrant is more likely to be a rapist than a legal OOV On a ban on Muslims , it is retarded but not OOV On the OOV I think it is fair to question the OOV of Obama 's birth and if Trump had good reason to be skeptical of the evidence fair for him to OOV The OOV think has kicked up a bit here in the UK too as some people want Obama to be our next OOV Good job he is Kenyan so can stand to be an MP OOV While I found Trump to be a creep and likely a massive liar I have n't found his sexual comments to be OOV Fat girl picture , one persons word OOV another. Not OOV OOV his wife , not trusting his no ex wife is n't sexism by its nature and no compelling argument is made to show it is OOV 1991 beautiful ass , OOV the OOV The media does appear to higher that way , there is a reason a face only for radio is a OOV Olympian 1992 , we all look at athletes to some degree on their level of OOV Nothing OOV 1992 No words , I 'd have to see OOV From the way the site has set it out it appears as if he is talking about Miss USA , which is fair enough the contest is n't supposed to be easy. 1994 OOV duties ' , I imagine OOV wives given they are married to a billionaire do n't work. When one is the stay at home in a relationship the OOV jobs are theirs to do. 1997 OOV I imagine this comes from being a billionaire , one might ask why is this woman half my age so OOV 1997 Miss OOV Miss USA is a contest for OOV women to see who is the most OOV One would n't ( at least should n't ) expect to see rocket science. 1997 Princess Diana , could well be true. He maybe HRH Prince Harry 's OOV 1999 OOV Sounds like a joke because he is dating a woman much his OOV 2000 Sex list , he is a OOV male , he is likely to think about women he 'd want to. Is it not common in America to have a celeb crush ? 2003 , OOV has a good figure in terms of what is OOV as OOV His weird obsession about it is just that OOV 2004 , he 's a big headed prick still nothing OOV 2005 , why did he make this comment , Lord Sugar insults the OOV Was she nagging ? 2006 , well that is n't OOV It 'd be incest if she was his daughter but if she is n't it OOV 2006 , Rosie is a OOV human , what is sexist about the OOV ? I 've not seen much of her but what I have I have n't OOV In terms of weight I do n't agree with fat acceptance it OOV leads to a OOV society as people OOV to make the 20 steps form their cars to the OOV OOV 2007 beauty is in the eye of the beholder and one can find any number of those things beautiful. 2007 OOV OOV on beauty means someone is n't beautiful , how is this sexist ? 2007 Lady or a OOV Rather OOV idea the way many women and men hold themselves within our two nations is vile and a finishing school of sorts show might do the shred of good. At least it is on par with OOV Shore which is OOV idea minus the lady part.

2008 Trump may or may not be lying either way he likes large boobs and wants to appear as a sex icon , not OOV 2008 , not heard the story before but from that OOV she could be a gold OOV 2009 , Trump on his show about beauty chooses beautiful women in his eyes , not sexist this is called selection because not every candidate is going to make it on the OOV Not OOV 2010 , women on Miss USA feel OOV Here is a tip for them do n't go on a show where that is the premise of the show. Not OOV 2011 , breastfeeding has it 's time and place. If one needs to breastfeed they should excuse OOV from the room and find a quiet place to do it out of the home. Yes it is natural , so is OOV we do n't just shit we go to the OOV 2011 , dog. The OOV is trying to insult Trump he fired one back. Yes maybe he would n't call a man a dog but it is a gendered OOV One is less likely to call a woman a **prick** or dick than they would if it was a man. 2012 , **penis** jokes are sexist ? I have grown tired of this. If there is a nail in the coffin after this could you give me the year and I 'll go look .

(OOV\_comment\_begin) As for how involved he was [ This ] ( http : OOV ) is an interview with trumps former rental OOV OOV when he and his father went in for an office visit Trump was asked what they should do about a black woman 's OOV , they replied “ You know I don t rent to the OOV Put it in a drawer and forget about it. ” He was involved directly in that policy , there is no doubt of that. OOV Except it was trump , not liking that they guys counting money were OOV OOV Except there is no evidence to back any of that up. In fact career criminals are more likely to stay in mexico simply because they are more likely to get away with their OOV Evidence shows the current illegal immigrant population of the US are less likely to commit crimes than average citizens. Does that mean I agree with unlimited immigration or anything ? No but it does n't mean that OOV fear mongering creates a even close to true image of what is really going on , and the real problems and complexities of US OOV OOV Agreed , but it also does fan the flames of the doubt in the immigration system. The US has heavy heavy checks for immigration and asylum OOV Trump was simply showing he had no idea what he was talking about with this one , but I did n't bring that into it. OOV Oh good **fucking** god ... Obama is American , he was born in OOV By all rights he is a natural US OOV Trump had no reason for the **birther** **nonsense** other than being a **OOV** OOV If you do n't know alot about racism in america , many of the racist movements in america have had questioning hereditary qualification as a basis. There used to be one drop rules , that one drop of black blood in your OOV disqualified you from legal rights. The birther movement was thick with that. As for the **british** **birther** stuff , as far as I was aware Obama has n't showed any interest in being involved in british government. If you will note I used that list to talk about his crude rude behavior and OOV But your comments seem to be a bit dismissive of the actual ramifications and implications of his actions , namely that trump does n't seem to treat women with the same agency he treats men. Now If you look at Trump 's history he has been sued [ 20 ] ( http : OOV ) times for sexist OOV , and a [ 21st ] ( http : OOV ) this year for his campaign. If you ca n't note that Trump treats women drastically differently then men , and in many cases as sexual objects more than people you are OOV And his actions during the Ms Universe pageant are technically sexual harassment of employees , since during that pageant they are under his OOV Now you could dismiss all of this as misunderstanding , but they represent a pattern of behavior that if not sexism , is as close to it that it makes no difference .

### 390\_delta\_t1\_cw4x93h.json (delta-ah)

(OOV\_comment\_begin) OOV Not **disagreeing** with you , **but** if so why mention in the **OP** ? OOV But that 's the **point** of OOV - it 's ALL of the OOV and not just ones you are subscribed too. As OOV pointed out , **once** **this** happens for one **subreddit** what 's to **stop** it happening to other **subs** .

(OOV\_comment\_begin) I mentioned it for the **sake** of full OOV It was to prevent the **possible** **undesirable** results of **me** **creating** **this** thread and then **having** **someone** else bring it up .

(OOV\_comment\_begin) Ah , ok that makes sense. But in regards to the other **point** , if they remove OOV from OOV you can **bet** there will be others calling for the same to **happen** for other OOV they do n't OOV **of** **I** **do** **n't** **believe** that 's the right step and can you imagine the drama from OOV being censored ?

### 1024\_delta\_t1\_dadzjjj.json (delta-ah)

(OOV\_comment\_begin) What if rights are arbitrary , and **it** 's in one 's personal best interest to assure everyone else 's right to life , so their right to life will also be respected ? The OOV conventions outlined rules about treatment of OOV and POWs to protect OOV , **because** **it** 's in everyone 's best interests. We agree not to torture enemy POWs and **kill** **OOV** **because** we do n't want our own POWs and civilians tortured and **OOV** **It** **does** **n't** **necessarily** **require** **moral** **justification** .

(OOV\_comment\_begin) Good **point** , **but** what makes him to want his live to be respected in the first place ?

(OOV\_comment\_begin) Because for humans , life = good ; death and **pain** = bad .



### 703\_delta\_t1\_djb8nb4.json (delta-ah)

(OOV\_comment\_begin) OOV Mass revolt has nothing to do with democracy. OOV But seriously , research the Arab OOV The Mubarak regime was all about “ protectionism , isolationism , and distrust toward OOV ” You think the Egyptian state-run media is OOV towards outsiders ? According to them , every ill in their country can be traced back to OOV ( that has been the narrative for 3 generations ) . Again , very recent example of everything you ’re proposing , played out in real life , crashing down around the people who enforced a weak system. OOV The [ OOV idea ] ( https : OOV ) was an internal policy , submitted by an internal candidate and enforced by an internal OOV The OOV idea is basically “ everyone else can piss off , we ’re not trading , we ’re not leaving , we ’re not opening our OOV Fuck you people , we ’re staying home. ” Maybe look up the OOV March and see how well that worked out for NK when they refused to ask for help from outside OOV By the way , the success of an extremely isolated country depends on never ever having a crisis. OOV Fine , the overwhelming narrative in the world is “ Nazis were the bad guys and their system of governing did n’t work. ” Please do not disagree or challenge it , as you will only create OOV Look , many many countries have , and have had state run media and educational systems where freedom of press and freedom of speech is harshly OOV You just have to come up with a single example where this lead to the success of that country in the form of long term quality of life or growth of wealth ( which is not the same as GDP ) .

(OOV\_comment\_begin) Considering that Arab spring began on social media , i think that the Mubarak regime was isolationist only in name. Despite considering North Korea to poor through no fault of their own , i still despise the Kim regime because of its stupidity ( OOV does n’t work ? just switch it with something more convenient , but the OOV are too weak to do so ) But OOV , by itself creates confusion , while Nazism promotes order. Nazi Germany ’s quality of life was better than what the U.S. had before WW2 .

(OOV\_comment\_begin) You ’re not refuting the facts others have OOV Now you ’re just repeating talking points.

And if your talking points were true , you ’d be able to show us all objectively how they are true. OOV Once again , OOV cut themselves off from the rest of the world , not the other way around. OOV put their people through famine by refusing to trade with outside countries , not the other way around. They adopted a policy of total isolationism , and now they are one of the most destitute countries on the OOV By contrast , South Korea , which shares the same basic natural resources as NK , but retained open borders and trade deals , is a first world country. OOV Okay firstly , if Nazism was such a unifying ideology , they would n’t have lost Russia , okay ? OOV with the Japanese empire ’s assistance on the Eastern OOV Germans lost Russia because the party was falling apart at the top. Russia is one giant , glaring testament of the ineptitude of the ruling elite at the time ( aka the Nazi party ) . Mein Kampf is pure OOV Maybe it sounds good on paper , but Hitler got to test his theory , and it did n’t work , did it ? That ’s not a debatable point by the way. The Nazis lost. They lost OOV And secondly , American Nazis are not German OOV You do not have the efficiency nor the discipline nor the impetus to pull off what Germans did after a decade of OOV After the Treaty of Versailles relegated Germany from a first world country to a country that could n’t even feed its citizens , let alone have a standing OOV Every time some dumbass with a swastika tattoo shows up on American news , it ’s because they threw a OOV fit and stabbed OOV Not exactly taking over Poland , is it ? Nazism was as powerful in Germany as its ever been , and OOV still OOV Hey , did you know there ’s only one country in the history of the planet to ever rule transatlantic \*and\* OOV trade ? Do you want to guess what country that is ? The OOV , OOV , ethnically diverse , free OOV United States of America. Today , the only superpower on the OOV Also , a key player in OOV the Nazi party in OOV So yeah , American ideals have problems. They have OOV But those weaknesses are demonstrably fewer than the weaknesses of Nazism .

### 1107\_delta\_t1\_djyyp1m.json (delta-ah)

(OOV\_comment\_begin) This is not the first time in U.S. history that we have been politically OOV In reality , nothing is new here. Yes , Trump is an anomaly , I wo n’t try to say he OOV However , the sketchy stuff going on is no different than what has always been OOV The OOV during the Vietnam war was a shit show. You had the hippie movement preaching openly communist OOV The Cold War was raging on , and the right accused the left of being USSR OOV Not only did that era not lead to any Civil war , but the “ hippies ” wound up growing up to be the biggest conservative voting block in the U.S. That should tell you a lot about how artificial much of this drama really is. Every generation goes through struggles that look like the end of the world , but the world always seems to not blow up for some reason ...

(OOV\_comment\_begin) According to data from the [ Pew Research Center ] ( https : OOV ) , the US is much more polarized now than in the OOV the only comparable time is during Reconstruction , 150 years ago. The fact that it ’s been steadily increasing now since the fifties is very much cause for alarm .

(OOV\_comment\_begin) Its funny you referenced that Pew Research OOV There ’s a [ Washington Post Article ] ( https : OOV ? OOV ) that explains the faulty logic of that OOV It explains that we are currently “ sorting ” , where each side is consolidating its voter base. That is different than polarization .



### 196\_delta\_t1\_cwbley3.json (delta-ah)

(OOV\_comment\_begin) The Republican party has become so extremely right-wing that it is simply out of touch with America as a whole ( OOV the OOV of course ). The vast majority of the candidates are doing counter-intuitive things like denying science , taking bad positions due to lobbyists , and OOV certain rights. I used to identify as conservative up until very recently when I realized from watching these candidates , analyzing their positions , and looking at the rhetoric and vitriol of those that support them , that I want no affiliation with them OOV “ God , guns , and freedom ” can only get you so far. There are very little sound positions coming out from them. ( Rand Paul seeming like the best of the worst ) OOV speaking , why would the GOP be a viable option as of right now ? OOV

(OOV\_comment\_begin) There seems to be a lot of OOV of what I am OOV Yes , I know that people like what they like and they will vote for what they like. ISIS likes Sharia law. That is their OOV good but not an OOV good. The Democratic party has more OOV sound positions , while the GOP relies on gathering the support of those who share their OOV sound positions .

(OOV\_comment\_begin) What you do n't seem to understand is that about half of the people in this country hold views that are OOV contrary to your own. Your very definition of “ good ” runs counter to OOV In most political issues , “ good ” is OOV The Democratic party has positions that are objectively sound for expanding gay rights and and giving women control of their OOV But an R voter would call it the corruption of the sanctity marriage and endorsement of commercial OOV Roll your eyes and call them ignorant if you like , but the simple fact is that half of this country completely and utterly disagrees with you on a fundamental level about what is “ good. ” And that 's why half of this country votes that way .

### 676\_delta\_t1\_dmlylpv.json (delta-ah)

(OOV\_comment\_begin) Really ? Why would you rather not have depression ? Because it goddamn OOV \* You have neither the energy nor drive to do anything you want. \* And the failure to achieve those things only further drive home that you 're worthless \* Any good things that happen to you feel kinda OOV , things that used to entertain or even just distract you are reduced to pointless things that barely helps \* You remember being happy , maybe , or was even that part of your imagination , but there 's this knowledge that it ca n't happen again \* Friends are driven away , partners try but ca n't deal with it , staying on your own just makes you wallow even further into it Why would literally anyone want that shit ?

(OOV\_comment\_begin) Obviously no one wants to live like that. My point is the problem is n't the depression itself , it 's the fact that a person like that is so hopeless in their external situation , and every time they care about something , the world has smashed that thing into OOV Eventually they lose energy and drive to do things because they ( accurately ) realize that even if they had energy and drive , things would n't get much better .

(OOV\_comment\_begin) But the thing is depression only makes it worse. Why would you stack the odds OOV OOV against your favour ? Now not only does life still constantly shit on you , you ca n't even enjoy the one time it does n't .

## 3 False negatives (Type II error) (AH as delta) 61

### 1194\_ah\_t1\_d8fdroy.json (ah-delta)

(OOV\_comment\_begin) OOV Attempting suicide is not similar to actual OOV You ca n't put them next to each other as a comparison to establish severity of a problem. OOV So you think women are just stupid for not using effective methods and that is the OOV thing that accounts for the 300 % greater suicide rate ? Come on. OOV They did n't say that and it is in fact OOV who is being dishonest for misrepresenting them that way .

(OOV\_comment\_begin) Attempting suicide is n't similar to “ actual ” suicide ? Good lord , that 's a new one. The only real difference is method success rate. How is that truly not similar ? Why do you think we try to help people who have suicidal thoughts ? Why do you think we take OOV OOV and try to get them a new lease on life ? Why do you think we credit those who pull us or our loved ones out of those slumps ? Because attempting suicide has nothing to do with suicide ? Come on. You have to be more intelligent than that. I 'll stand by my statement. Mental gymnastics are not proper OOV And also , keep in mind , it is not a competition .

(OOV\_comment\_begin) OOV I know it 's crazy how I get hung up on trivial little differences like somebody OOV OOV That sentence contains the assumption that every suicide attempt is genuine which is factually OOV Not to mention the implication that women are hugely less capable than men. Again : Do you think women are just stupid ? OOV Because we ca n't be certain we know the one from the other until it 's too OOV OOV I think I understand this material a lot better than you do. The problem is they 're not only very different in outcome ( most of the time ) but also very different in motivation and therefore treatment. Even treating somebody who has no intention of killing themselves as somebody who does , can have fatal OOV There is such a thing as accidental OOV There is such a thing as using suicide attempts to blackmail people. And there are situations where people are in such a bad place that they genuinely feel that dying is the only way out. And we ca n't always presume to know they 're wrong about that either. Simply lumping everything together as if it 's the same thing is hugely detrimental to fixing either of the individual problems and , in the case of those who do it just to forward their political agenda , also highly OOV OOV It was OOV who came in when somebody correctly said men commit suicide far more than women , and said “ Yet , women are more likely to attempt OOV ” placing the two in direct comparison as if the one makes up for the other .

### 118\_ah\_t1\_dd2aife.json (ah-delta)

(OOV\_comment\_begin) Do n't you think it 's a little dishonest to make a bunch of posts about how killing someone against their will is fine , but then five posts deep mention “ oh actually btw they want to die , and it 's with their consent ” ?

(OOV\_comment\_begin) It 's not with their consent , they can not give consent because they are on a ventilator , unable to communicate , except for moaning in pain. That is you loved one , you know they are suffering , being tortured by OOV You hope against hope that somehow they wo n't die. But they will , we all do. At that moment you must not let your desire for them to live , as much as you want that , result in them being tortured by disease and OOV You must make one of the hardest decisions of your life. Imagine being that person , imagine the last few months of your life being just torture , pain and suffering , and despite it the end is the same. That is not murder , that is humanity , compassion and pure love. And , again , I hope you never have to experience either side of that yourself. But I beg you to be aware of what people go through before thinking that those things boil down to 'let 's unplug grandma while she 's watching jeopardy because it 's fun and we are murderous today haha '

(OOV\_comment\_begin) OOV No , it 's not about OOV desire for them to live. Here 's what you said earlier : OOV OOV So it seems pretty clear that whether or not the patient wants to die has nothing to do with it. You are n't encouraging me to ignore OOV desire for them to live. You 're encouraging me to ignore whether OOV want to live. Here 's another thing you said , in response to “ If you had your relative killed against their will , that would seem intolerant ” : OOV So it seems like you 're saying that there are people who OOV to kill their relatives , even though their relatives do n't want to die. And if you do n't see why that 's monstrous , I do n't see that I should listen to even a second of your maudlin OOV .

### 700\_ah\_t1\_dihcq6v.json (ah-delta)

(OOV\_comment\_begin) OOV No its really not. All the nations we would be giving money to would be buying drastically more renewable tech from us. It makes us more money than it OOV OOV Thats actually pretty good ... Think of it this way , the current energy addition per day is equivalent to 400,000 atomic bombs , that would be taking away energy ... OOV Well it shows commitment to a common goal ... and creates a method for countries to examine each other ... OOV They are supposed to be ambitious ... OOV Well there are consequences for that too ... OOV Except it doesnt ... OOV Global greening is partially happening due to efforts on a global scale ... Efforts like a the Paris Accords ... You have to realize that greening is dependent on efforts to keep more OOV On to of that carbon sequestration takes time. If the rate of CO2 production is higher than the rate of sequestration than it still does nothing ...

(OOV\_comment\_begin) If you want a better shot at changing views , consider laying off the ellipses a little bit next time. Really comes off as condescending when you overuse them to that extent .

(OOV\_comment\_begin) Want to compare deltas ?

### 547\_ah\_t1\_d4oqjkc.json (ah-delta)

(OOV\_comment\_begin) Your points : 1. Is wrong. People set a good example all the time , and this does lead to positive OOV For example , if people pick up their dog 's poop off the public walk , you never see poop on the public OOV You therefore feel very insecure when your dog is the only one who leaves poop on the public OOV 2. You are still doing something negative by a small OOV You had a choice to do something positive , and instead you chose something ( minutely ) OOV This only reflects upon you , not the OOV 3. Other people spend less time picking up trash if you have already picked up yours. If your time was too valuable to pick up your trash , then you literally are saying your time is more valuable than the person that will pick up the OOV This is presumptive and generally only reflects badly about you. I do n't mean to be negative , but understand , there are many things that judged from the macro view seem negligible but we would NEVER do. OOV example , there are 7 billion people in the world. Killing one is a negligible action. But it 's highly OOV If you think this a stretch , think about where you commonly dump your OOV It is quite possible you only dump your trash in a place where it primarily only affects one family ( other than yours ) . Is that fair to that family ?

(OOV\_comment\_begin) 1. You are OOV on something that is OOV small , of course you affect more than just your closest links but in the grand scheme of the city nothing changes OOV This should be taken as a fact : the average person in todays world does n't affect his city in any meaningful way , he barely affects his OOV 2. We are n't discussing feelings , if the gain in an action does n't exceed it 's expense there is no reason to act. 3. This I wanted to address. First of all , it has nothing to do with the value of my time , it has to do with my reasoning vs the others. Secondly , I live this life from and only from my perspective so of course my time is more valuable TO ME then someone else 's is to me. Its the only time I can experience. 4. OOV someone is drastic and would probably have more negative effects on my life , this can be expanded to any severe crime. OOV are n't relevant to this OOV First of all , there is no such thing as " fair " and secondly I should n't care about about what they feel since it does n't dictate my personal OOV This example assumes a significant affect on a small group , which is plausible but not what I am talking about .

(OOV\_comment\_begin) 1. You give a very weak answer to this. If everyone followed your ( supposedly correct ) view , then nobody would clean up their dog 's OOV Indeed , this would have macro effects on people 's fitness , their desire to go out and shop , and the property values of the OOV These have significant effects upon a town , and indeed is why many cities have laws requiring people to pick up their dog 's OOV You would dump a cup of motor oil in the river because its only 1 part per billion of the local water system ? When you golf and hit the green with your shot , you do n't fix the OOV ? 2. If that is your moral groundwork for your decisions that is fine. I would be interested to know what is the number that would n't become irrelevant anymore. Where is your cutoff OOV ? 3. Where is your cutoff here too ? How much of an other person 's time would you have to take in relation to your own for it to become a negative decision in your mind ? 4. Your argument is an argument for OOV state funds if you can get away with it. Your argument is an argument for framing someone in the position ahead of you in a company if you can get away with it. If you can get away with it , you would do anything to someone , because as you say , " morals are n't relevant to the discussion . "

### 1213\_ah\_t1\_dlfw9hg.json (ah-delta)

(OOV\_comment\_begin) OOV OK again , if he 's not talking about his coworkers or future potential coworkers , than what is he talking about when he discusses training , hiring practices , the gender pay gap , and " Google 's biases ' ? Who are his suggestions for if not employees at Google ? ... . and if they ARE for employees at Google , than how can he be calling upon evidence that OOV n't apply to employees at OOV ? OOV Because your explanation of his motives (

that he 's not talking about Google employees while making suggestions to Google about their employees ) is OOV Much more likely is that he threw in some of that “ I 'm not sexist but ” stuff to make his argument more palatable and because of his apparently genuine desire to see himself as rational and OOV Also ? Because dudes like this are a dime a dozen and not subtle .

(OOV\_comment\_begin) OOV I 'll repeat my statistical example - let 's change it a little : OOV 's OOV that distributions of IQ for men and women are the same , but men have on average OOV points higher OOV If a company 's criteria end up hiring people in OOV range , they 'll end up with more men than women in the workforce , yet everybody will be in the OOV OOV Both men and women. What you are saying is that a claim “ men are on average OOV points OOV than women ” , which would be correct OOV , applies to the employees of the company as a group. But it does n't , they are all in OOV OOV However , it would explain why they are more men than women in the company. Which is pretty much exactly what he said. He explicitly said that these are OOV statistics and do not apply to OOV He did n't comment on OOV employees as a group ' , however the argument 'he obviously does n't understand statistics , so he must have meant it ' does n't cut it for me. OOV I 'd say he thinks Google 's methods of treatment gender disparity is wrong and that it should use different methods , that would actually really address the problems. What 's incoherent about it ? OOV Give a dog bad name and hang him. That 's a basis for good discussion , is n't it ?

(OOV\_comment\_begin) OOV I do n't know how much more clearly I can say this : if his comments are n't about coworkers or potential coworkers , then they are useless as evidence for the suggestions he 's OOV If none of his stats apply to google employees , then it 's nonsense to mention them in reference to Google 's OOV If he 's telling the truth , and his statistical arguments do n't relate to any potential employee , then his conclusions are non OOV If the evidence actually is relevant to the context he 's applying them , then he 's disingenuous when he says nothing of what he says applies to Google employees or potential future Google OOV OOV If you approve his manifesto , then you should approve of this. I 'm merely using stereotypes , which are usually accurate and should be encouraged ( the way OOV means it which is much more limited than it sounds ) . It is not difficult to identify what kind of person this is , and it 's not one who has any new , interesting , or useful ideas about culture or gender .

### 873.ah\_t1.cs3ulgy.json (ah-delta)

(OOV\_comment\_begin) What is reddit in your opinion ? Like , you want your view changed that this wo n't “ kill ” reddit but what do you even think reddit is ? Reddit is a OOV That 's it. Sometimes it 's an idea , but ideas do n't die. Reddit as a platform can , though. When I joined reddit , it was because a friend wanted to make a stupid sub for his stupid OOV server and wanted us to comment in it. 3 OOV That was all it got , and it was all from people we OOV You know what though ? I started looking around. I found the OOV sub that I lurked in with no account for months. That was before it went all dumb and “ OOV OOV OOV ! ” and it was OOV I actually started using my account - or actually , I think I had to make a new one because i forgot the OOV OOV though , reddit became more than just the platform , it became an idea - you can have any space you want for you , and the things YOU want to talk about , and others can join you. You do n't have to piss around in OOV where others are n't going to know where to find you and your OOV It became an idea. OOV 's do not OOV Reddit as a platform is no longer that idea for me. It has n't been for a while. I 'm sorry , but it really OOV For way too long some harassment has been more equal than other , and if you drastically alter your platform - what people see as your platform - for the sake of curbing harassment , you ca n't just pick and choose which harassment is better or worse. People will see the hypocrisy for what it is , and the idea they thought was reddit - it will be no more. Reddit may just as well always exist as a platform - but what that platform looks like , it will never be the idea of what reddit was .

(OOV\_comment\_begin) You are taking this shit way too OOV It 's a web site. Not some noble “ idea ” . Just a web site. And it wo n't die or even be diminished by this crap , because all of the subs I go to for content and conversation are still very much alive and well and in no danger of getting censored because they 're a mile away from OOV One little tiny shitty sub full of shitty people is n't going to be OOV It wo n't diminish the site. In 3 days nobody will care .

(OOV\_comment\_begin) OOV You sure changed my view. “ You take it too seriously OOV ” OOV OOV It is just a website

to some people. To other people, it is a platform - a place that they can talk when they can't talk anywhere else. For you to try to diminish what OOV OOV means to someone else - well, shame on you for that. OOV And good for you. "Reddit is fine because of the subs I go to are fine" OOV Perhaps you would like to define for us what harassment is under the definition the admins use? If so, I would OOV like to hear OOV because they have n't gotten back to me yet. OOV OOV was number 13 on the board, OOV It has over OOV people on it. OOV You are saying all OOV people were shitty people, and you are also saying that the people who OOV fat but liked the sub because it gave them motivation are shitty people. OOV People miss it right now. OOV It already has for some - for you, perhaps not, but \*the world does not revolve around you or anyone else, OOV Everyone is allowed to have their own subjective opinion and make their own argument for what they think constitutes the platform being diminished or not. OOV Maybe, but it's already been 4 since I first contacted the admins with an issue on inconsistent rule enforcement - I do n't intend to give up. OOV will OOV Even if nobody else does.

### 1118\_ah\_t1\_dn9tvt9.json (ah-delta)

(OOV\_comment\_begin) In a country like Norway or Iceland, places where universal healthcare works, everyone is everyone family or at least OOV In Norway I had a complete stranger walk up to me and ask me to watch their son for a moment. The idea of shelling out extra money so your 3rd cousin can have health insurance is a good feeling, but the idea of me having to shell out more of my hard earned money so OOV 3rd OOV cousin can have her 6th child is OOV In America blacks and Mexicans drive up the cost of healthcare via no pays and drive the amount spent on Medicaid through the OOV Also the fact that blacks are disproportionately obese, diabetic, and prone to heart disease means that if America were still a 90% white country the OOV budget could be cut by over 50%. Our universal healthcare \*is\* going OOV The NHS is an utter mess, and it is n't the Britons dragging it down.

(OOV\_comment\_begin) OOV what? You are clearly uneducated on the issue if you think "blacks are disproportionately OOV" What?! Blacks make up like 13.8% of the US Population; Latinos 17.8; whites 63%. According to the [Kaiser Family Foundation] (<http://> OOV), the percentage of population by race that is overweight is as follows: whites - OOV, blacks OOV, Hispanic OOV So you're correct in saying that a greater percentage of the African American community is OOV However, you're failing to factor in that OOV% of OOV (white population) is OOV more than OOV% of OOV Let's go ahead and do the OOV Estimated number of overweight white people = OOV Estimates number of overweight black people = OOV So do n't think that overweight black people, or immigrants in general, are the root cause. They are not. There are literally 4.5 overweight white people for every 1 overweight black person. OOV and let me follow up by saying I do n't think your concerns are OOV You, I'm sure, want to be happy and healthy just like the rest of us. The reason that the percentage of overweight white folks is lower is very likely an economic one. Generally speaking, white people make more money than other ethnicities allowing them to buy healthier foods, take time off to exercise, etc. Once we realize it's not the Blacks or the Hispanic people, it's the elite that control the government, that are keeping us from realizing our dreams, we'll start to fix the problem. If wealth were distributed more fairly we would see better health outcomes, OOV The best way to do that is provide greater access to education and universal healthcare; two of the biggest economic burdens of our time. These initiatives could be funded, I'd like to say easily but I do n't really know, through tax reform aimed at the top percent of earners and most profitable businesses.

(OOV\_comment\_begin) You have to cross reference those numbers with the percent of that population that is on the welfare OOV Over 50% of Mexicans and 42% of blacks are on welfare in America. 14% of blacks have OOV I do n't really care if you want to be fat, I just do n't want to be responsible for your poor life OOV I do agree with your final point though but I disagree with the term "elite". If you look at who runs the government, the media, the banks, international finance, big pharma, etc. it is all OOV Blacks and whites got along as well as could be expected before they started turning us against each other.



## 220\_ah\_t1\_d67fo3c.json (ah-delta)

(OOV\_comment\_begin) I'll ignore the OOV I never did philosophy at Uni , thank OOV In the rewind scenario , same results do not show what is causing an action , the computer , the human , the whole or the parts or something else like OOV The thought experiment resolves nothing. What causes the state of the next frame ? Is it atoms via bumping and shoving things around ? Only OOV They do what they do , and sometimes they get bumped around in funny ways by bigger patterns and sometimes by smaller OOV Atoms are a high level pattern compared to protons , neutrons and the particle OOV Why do atoms get special causative powers and the micro patterns below or before and macro patterns above or before do n't have causative powers ? They do n't .

(OOV\_comment\_begin) OOV Any causative power they have is derived from the smaller particles that comprise them , but this does n't necessarily have anything to do with that at all. Of course , I know what you're going to try and use it to do. You're going to try and use it to argue for why , if we follow the chain of causation , we ca n't eventually get a self that has casual power. And my answer will be the same , because the self is n't actually a OOV We just have a brain , that's all. I do n't understand how you could even think you could really have a OOV ' when I just explained to why how you ca n't even control your own thoughts .

(OOV\_comment\_begin) OOV This is hilarious OOV Your self = you. What you are arguing amounts to no more than " You , I , are illusions - for OOV listen to me ! " ( Why should I heed the explanation of a OOV illusion ? Or is this the OOV part of your self speaking ? ) Your OOV ( " I do n't understand how you ... " ) and your principle ( " a person does not control their thoughts " ) are at complete OOV On a OOV premise , you should n't be OOV ( Infact your emotional response points to what you really believe - that you and I , yourself and myself both exist - and your application of effort to use reasons ( albeit poor ones ) on another is worth your time because it can change beliefs ; welcome to self-determination ) .

## 988\_ah\_t1\_dealh7i.json (ah-delta)

(OOV\_comment\_begin) Also I have to disagree that having an advanced degree makes one smart or whether or not going to an ivy league school is important. My aunt received her Doctorate in African American studies from Yale yet only teaches a basic sociology class. Yes she has a doctorate but is in immense debt and makes less money than I do despite her 20+ years working in OOV I have just a basic undergrad degree in bio , work in a stem field and worked very hard to leave school with no OOV Arguably , my aunt is much much more intelligent than me , yet I am clearly more OOV Which one of us is smarter ?

(OOV\_comment\_begin) Your argument that you are smarter than your aunt because you chose to go into a field that makes more money is pretty good evidence that she is OOV Your argument that making more money means you are more successful is also pretty good evidence that she is OOV Guys like Stephen Hawking could all make tens of millions of dollars if they went into finance but by your logic they are n't very smart because they went into OOV Same could be said of people at NASA and great mathematicians .

(OOV\_comment\_begin) So first thing , I did n't make the case that I am smarter than my OOV I argued that I am more successful , and that she is more intelligent but I specifically asked OOV which of us you deemed as " smarter " . You have absolutely no proof that someone who is objectively gifted in one field will have any success in another field. Just because someone is good at physics , does n't make them immediately gifted at finance ( and you know that dude ) . To be honest , I do n't think I am more successful , I AM more OOV I have zero debt , a well paying job with lots of room for mobility , exceptional dental and healthcare , a lovely girlfriend who works in an equally well paying position and a paid off car as well as a good bit of money in savings and I'm only OOV My aunt has a doctorate , a published book that did dreadfully , a base level job in an extremely large college with no room for mobility since she is a white woman in an overwhelmingly african american field , 50,000 dollars in debt , no partner of any kind and her apartment wo n't let her have a OOV She's 55 now.

Do you really believe that she is “ smarter ” for making the life choices she has ?

1250\_ah\_t1\_ckl51nb.json (ah-delta)

(OOV\_comment\_begin) USD is actually pretty good in this instance , because if I told you they had 600 Cuban Pesos that 'd be a worthless OOV You can also OOV all their expenses in U.S. dollars too , to keep the comparison going. I did a more detailed breakdown further down the OOV The statistics you offer also support the idea that a Socialist country does n't do as well as a Capitalist country , even using your preferred Human Development OOV Norway and Sweden would be more akin to Socialist states ( and even then , not to the point where they centrally plan their economies or prohibit private ownership ) in a Capitalist country ( Europe ) , albeit with Socialist OOV Europe is also nowhere near as prosperous or economically successful as the United States , by an order of magnitude and enjoys the shelter of U.S. military and economic hegemony without the need to bear any of the expenses associated with both securing and maintaining that status. Africa and India in particular are some of the least Capitalist places left on the planet , which goes a long way to explain why so many children die from poverty , starvation , disease , and war. There is plenty of arable land in Africa to feed every African , and plenty of food in the West that could be shipped there. In order to do that though you need order , property rights , infrastructure , and the rule of law , Instead you have chaos , protectionism , warlords , and death. It will remain that way until property rights are established and OOV I throw away whatever I do n't feel like eating , and I do n't stay up at night worrying about OOV I do sometimes worry about little armchair OOV , who would happily plunge the world back into the Dark Ages in their misguided quest to redistribute resources. The road to hell is paved with what ? Let 's stick to facts and reason , it 's served humanity quite well thus far .

(OOV\_comment\_begin) I think you missed the whole point of what I just said. It 's not about how much money they have , but how good the quality of life actually is that OOV OOV This is just ridiculous , almost every EU state is more socialist than the US and could fit into the category of a OOV Your argument is OOV OOV You can tell yourself that all day long. The empirical evidence from the OOV and OOV that clearly demonstrate otherwise are n't OOV And if you 're going to say “ Well our GDP is the biggest ” so what ? China has the second largest GDP , but I doubt you 'd choose to live in China over the OOV OOV Wrong , the US spends about 3.8 % of it 's GDP on the military , here are some European stats : United Kingdom 2.3 % Turkey 2.3 % France : 2.2 % Italy : 1.6 % Germany : 1.4 % These nations are all allies who depend on each other and all spend their own fair share of money on their OOV You have no clue what you 're talking about. I doubt you even did a moment 's research before coming up with that OOV As for Africa , the lack of enforcement of property rights is what you get when you have the “ small , localized government ” that people like you OOV It 's your dream OOV OOV I could easily come up with a similar childish statement to throw back at you , but I 'm above that. But lets say I did , is being a patronizing , arrogant douche a good argument when I use it ? In any case , you 've proven to me thus far that you 're really a waste of time. You clearly ignore solid evidence that directly contradicts your statements and then offer no evidence of your own when dismissing said evidence. And above all , you really do seem like a terrible person “ I do n't worry about starvation , why would the lives of innocent children bother me ? ” . I 've been to many 3rd and 2nd world countries , so maybe I 'm bias , but I honestly think the world would be better off if self-centered OOV like you did n't exist. Do n't bother sending me a response , you 've made your “ I only matter to myself ! ” worldview clear .

(OOV\_comment\_begin) Ah , the old “ noble savage ” OOV I thought we 'd done away with that. Once again , item by item : 1 ) Europe more Socialist than the United States. Certainly , but less Socialist than actual OOV Gray and white are both lighter than black , as are purple , green , yellow , and OOV Having identified an object on the fringe , it 's not surprising that almost anything out there falls between the two OOV Declaring my argument null does not dismiss the facts of that argument , nor does it make that nullification fact. 2 ) By every objective and measurable standard , the United States surpasses Europe in OOV Great Britain lags behind EVERY U.S. state , including Mississippi , in terms of economic OOV How people feel about that is up o them. 3 ) Every country you cited spends about half what the U.S. spends in percentage on their military expenditures , some ( like Italy and Germany ) less than that. The U.S. budget is lower than usual , due to spending cuts , and Europe is higher than usual , due to U.S. pressure to carry a meaningful portion of their own defense costs. Furthermore , the comparison in absolute expenditures is OOV U.S. fleets keep the shipping lanes open , U.S. blood and treasure has kept the oil flowing , U.S. aid has checked Russia and China. Europe and the rest of the world benefit from all of that , without paying a fraction of the OOV Hence , the NATO summit in Wales , to try to get all NATO members to spend at least 2 % of their budgets on military , as agreed under their treaty OOV 4 ) Africa is not what you get when you get “ small , localized government ” because a militia is not a legitimate form of representative

government. You 're trying to deploy a red herring here to distract from the fact that you have no legitimate answer. 5 ) Your armchair OOV has led , in the last century alone , to the deaths of millions , if not billions , of people. I presume you 're also invested with the right to vote , which means your **asinine** opinion , if not countered , could become policy. 6 ) You probably could n't come up with something to throw back at me , because you did n't , **but** we would n't know if being a **patronizing** **douche** was a **good** **argument** because you did n't bother to try. It probably would have been more substantive than your emotional attempt at **justifying** a position unsupported by fact or reason. 7 ) You 've spent quite a lot of time **wasting** your time , if that 's what you actually think. The fact that you have to qualify your evidence as " solid " is a strong indicator that it would not be perceived as solid in its own right. Furthermore , you literally cited nothing at all in your response , not a single article , journal , study. OOV 8 ) You attribute a quote to me that never occurs in my original post , which is a perfect example of how sloppy your reasoning has been OOV I do n't stay up at night worrying about whether the contents of my garbage can could be shipped overseas , because **I** know that the thing that causes these problems are the well-intentioned but poorly reasoned decisions of people like you. 9 ) Your empirical experience of 2nd and 3rd world countries , while relevant and meaningful to you , is totally irrelevant to a macro analysis of facts , outcomes , and OOV 10 ) OOV OOV like me are the ones that give you a warm , safe , place to sleep at night , and a full OOV Do n't dismiss us so quickly , you 're not equipped to deal with a world without us. Our cool , calm , reason is the only that keeps people like you from dragging us all back into a well-intentioned Stone OOV Here 's the response you asked me not to send , I hope you did n't read it. Another great example of your intellectual dishonesty .

### 337\_ah\_t1\_d86d3sm.json (ah-delta)

(OOV\_comment\_begin) She , and they , are referencing the **dictionary** **OOV** **Is** your view that Merriam-Webster has incorrectly defined what **feminism** **is** ?

(OOV\_comment\_begin) **Are** you **serious** ? **No** one gives any credence to a dictionary definition as the end all be all of anything , or even a cursory glance , unless they 're looking to avoid critical engagement with entire fields of study and just form a simple and easy conclusion that fits with their predetermined OOV They are not authoritative by any means. You 'd be **laughed** at in any serious discussion if you just deferred to dictionary definitions for your key terms .

(OOV\_comment\_begin) OOV **I** do n't agree with **this**. Also , if feminists **felt** the **definition** **did** n't accurately reflect their **views** , **I** **feel** like **there** would be more of an effort to change it .

### 44\_ah\_t1\_d2vpyf8.json (ah-delta)

(OOV\_comment\_begin) **Dude** , my **argument** is that if you care **this** much about abolishing the EC , you should care way , way more about abolishing the OOV **That** 's it. It 's **absurdly** **reasonable** and **I** do n't know how many more ways to say it .

(OOV\_comment\_begin) **I** understand your **argument** OOV **What** **I** 'm saying is that abolishing the senate and going **purely** by the house of reps is **absolutely** a **terrible** idea OOV major changes to how our representatives are elected ( specifically the structure of states ) . **I** 'm also saying abolishing the EC and going by a popular vote is remarkably easy to do , and without any major changes to our government .

(OOV\_comment\_begin) **Surely** the House as it stands , **though** , is **much** preferable to the status quo for you ?

### 330\_ah\_t1\_clmpp56.json (ah-delta)

(OOV\_comment\_begin) I 'm not familiar enough with SRS to say , **but** it 's **something** **I** specifically believe in .

(OOV\_comment\_begin) Okay , well I can tell you it is a common concept on OOV Their hypocrisy is the main reason I can n't stand them. I can handle terrible groups of people that are at least logically OOV They are people I can reason with. People who post on SRS are not the type of people that can be reasoned with .

(OOV\_comment\_begin) **I** **think** SRS makes a **really** good point about a lot of the users of reddit being outspoken OOV I know that I 've been OOV OOV really nasty things before just because my ethnicity or gender or disability has been mentioned in OOV And what scares me the most is that when I express my frustration in subs that are n't OOV spaces , I 'm met with a wave of downvotes and OOV I know SRS uses OOV and **biting** **rhetoric** , **but** **I** 've never seen anyone there use racist slurs , call women OOV or OOV , or use the word OOV to refer to opinions they do n't agree with. I do n't

know. I hear a lot of people **shit** on SRS and OOV and OOV in bigger subs , but all I 've seen from those three subs are safe spaces for women and minorities to talk about the **crap** some subs put them through .

### 531\_ah\_t1\_dg14gvn.json (ah-delta)

(OOV\_comment\_begin) Yes , you can reason with **children.** And yes , you can reason with OOV To a OOV If a person suffers from cognitive distortion you can not convince him or her no matter what you do. Hey , some people still believe the Earth is OOV What I 'm trying to say is that we have to accept this **fact.** Any laws and politics should consider it. You 'll ban entering children to churches and they will believe in **homeopathy** ( which is **irrational** ) . And OOV of maturity ' does not guarantee you 'll be fully rational at certain **point** .

(OOV\_comment\_begin) I agree , but what I 'm telling you is that all of this is **irrelevant** to our OOV You 're **derailing** the OOV Some philosophers argue that you can not know that the external world exists , and therefore one should be skeptical of any theory founded in OOV So even **conceding** that I exist right now is OOV But all of that is OOV There are certain premises that we must take for granted if we 're going to attempt to have a OOV One such presumption we must make is that you and I are OOV If we do n't presume that , then my words to you are OOV It **would mean** that **nothing** I say can affect you in any way .

(OOV\_comment\_begin) It 's pretty much OOV Religion works because it uses some of the cognitive distortions and imperfections of the human **brain.** One of the **consequences** my point of view is **implying** is that it does not make sense to ban religion from children only. It **would** make more sense to ban religion from all the people who are not educated enough. In particular from people who do n't know enough about human **psychology** and some **traits** that make us vulnerable for religious OOV OOV I do n't see why. Both of us can **make** some **mistakes** and we still can have a conversation .

### 551\_ah\_t1\_cyryr8e.json (ah-delta)

(OOV\_comment\_begin) OOV I absolutely do n't think they should be killed , but it sounds crazy to me that you are treating what they are doing as an extension of democracy rather than using force to get their way. You can have a sit in , but when you commit a crime ( occupy a building ) and OOV guns to defend yourself from the OOV while committing that crime , you have threatened violence. When you add guns to a sit in you clearly add the threat to shoot OOV It baffles me how you and other posters can do mental gymnastics to deny this. Why have n't the police arrested the protestors already ? Because the police are afraid of getting shot if they try. The occupiers knew bringing guns would have that affect , and that 's OOV they brought OOV That 's a OOV You do n't get to do that in democracy. It sounds like where we differ is : You see that the system does n't work perfectly all the time , and therefore you see the system as totally OOV This is a pretty juvenile view. No system reaches just result all the time , and no system completely prevents powerful actors like large companies from abusing their powers OOV Our system is in fact one of the best for ordinary people ever created in human history. It 's way better than a system where any individual can use or threaten violence when they feel OOV I mean , where does it end ? Do you really think that everyone who feels like they have gotten a raw deal is right to take a gun and occupy a federal building ? OOV Because I do n't live in Oregon and it 's not national news ? Because they actually did get made whole ? Because they ca n't actually prove Monsanto ruined their crops ? The " Monsanto Protection Act " does n't protect them from civil suit for damages by other farmers , it protects the designated companies from some government OOV There 's no reason the farmers ca n't sue Monsanto for OOV I mean , what about another example. What if I think farm subsidies are an outrage and it is morally indefensible that my government gave millions of tax dollars to protectionism ? I ca n't convince enough people to stop the subsidies , am I then allowed to take my guns and my posse and occupy a USDA building ? A representative 's office ? You do n't get to use force when you disagree with a policy , even if it seems unjust ( with the obvious exception of policies that threaten life or essential liberty ) . That 's life in civilized society. As unjust as it can be sometimes , it 's OOV OOV to have people using force or threatening force whenever they feel OOV It really is that simple. To recap : I 'm not saying democracy is perfect , I 'm saying in a democracy you do n't get to threaten to shoot somebody because you disagree with the law. Your argument seems to be 1 ) They have n't threatened to shoot anybody , which is hard to even take seriously , and 2 ) Yes you can ?

(OOV\_comment\_begin) First and foremost , you just do n't know what you 're talking about with a lot of the Monsanto



stuff. I do n't mean that as an insult but more that you should look into it because that legislation would directly have an impact on civil OOV OOV Do n't put words into my mouth. That is not at all what I said at all. OOV Farm subsidies are a thing because farmers are n't allowed to just sell their food for whatever cost they want. You do n't want to subsidize them ? Fine , but you ca n't not subsidize them and only allow them to sell their product to certain people for a certain price. Basically , you ca n't artificially limit someone 's income and not repay in some other kind of way. I understand what you were trying to say but you picked a shitty example. OOV Again , they OOV That is n't just an opinion , that is a fact by [ definition of the word threat ] ( https : OOV ? OOV & OOV & OOV & OOV & OOV & OOV ) . Something or someone can be OOV threat ( as in a noun ) without actually OOV OOV While this might seem trivial , in court that 's a huge **fucking** OOV Their protesting and having guns is most definitely OOV threat , but they have not actually threatened to hurt OOV I do n't understand why that is such a hard distinction for you to make .

(OOV\_comment\_begin) OOV You are making the wrong OOV Yes there is an English language difference between being a threat and making a threat ( OOV ) , but that is not what we 're distinguishing here. I am saying they brought the guns for the purpose of making the police afraid they would shoot them , and that is exactly the effect they have had. That is OOV a OOV The OOV definition of a threat does not require a verbal statement. OOV in a way that expresses an intent to shoot someone is equally a threat , deliberately making someone afraid you will shoot them is a threat , and equally OOV That 's what you do n't seem to understand ? OOV But you responded by nitpicking the example rather than actually responding to what you clearly understand is the point of it. Again , I ask , where do you draw the line ? What is to stop a new form of policy-making by siege , if anyone who feels wronged can pick up a gun and take a building ?

#### 1049\_ah\_t1\_diar98q.json (ah-delta)

(OOV\_comment\_begin) OOV Except that many people who do not believe in an afterlife still fear death by my definition .

(OOV\_comment\_begin) I did n't say you have to believe in the OOV You just have to believe in the “ potential ” for something to come OOV Call it fear of the unknown of you want. It 's not OOV Also that claim you just made ... I 'm not even sure I support that .

(OOV\_comment\_begin) OOV I am assuming that there is no such “ potential ” .

#### 181\_ah\_t1\_dg0dm4w.json (ah-delta)

(OOV\_comment\_begin) OOV If you say so. I wo n't pursue that further as I do n't know enough about the doll study. OOV That was just a tiny tangential remark to show you that your example of “ arbitrary ” was n't at all OOV OOV Would you also say the same about , say , human or childlike ? Is there no objective measure to be found in any of those things ? Would you at least concede that , to be masculine , is to be human ? OOV OOV It 's a OOV question. So , try to give me a clear answer please. Can you give me examples of masculinity that best demonstrate your position on this ?

(OOV\_comment\_begin) OOV I know what you were trying to do. I was implying you were failing at supporting your premise beyond stating it. OOV No. OOV A great many men define their masculinity in accordance with the behavior of caged OOV So take that as you will. OOV A great many people in our society say that men make better leaders because the are more OOV Lets say for sake of argument that men are in fact faster to make OOV Firstly , let 's examine the wording decisive has a distinctly OOV OOV whereas is reckless an equally valid descriptor with negative OOV Secondly , we then draw the conclusion that this OOV is a good quality in a leader because they 've been told that 's what a good leader is. So even if the first premise is true people almost unconsciously draw two more unwarranted conclusions .

(OOV\_comment\_begin) OOV OOV Just to check if I got this right : You honestly believe there are OOV objective human traits or childlike traits ? OOV OOV I do n't know how to take it. It was a yes or no question and you did n't give me a yes or no. And your example does n't even begin to demonstrate your position. You 're asserting all masculinity is OOV So even if you manage to find a subjective example which I do n't think you have , that only shows that it is n't all objective which I 'm not even OOV And it 's a convoluted mess of inaccurate wording and changing premises : OOV What is “ a great many ” and how did you quantify this ? OOV You 've



already changed the OOV Why ? OOV OOV is \*not\* an “ equally valid descriptor ” for people you ’ve called “ decisive ” . OOV means with disregard for the risks or OOV OOV includes no such OOV OOV OOV You changed the wording OOV OOV Now “ we ” are told this ? I thought “ people ” “ believe ” it. So who is telling us this ? I ’m not told this OOV I come across a lot of people saying women are better leaders though. OOV Which “ first premise ” ? The one you first wrote or your second one or the one after that ? All of them you present as the “ first premise ” . There ’s a OOV wrong with this but the main flaw in your reasoning comes down to the missing premise that OOV can be substituted for OOV It OOV And this is your OOV example - your reason to “ straight up refuse to recognize masculinity as an objective concept ” . Like I said , you should rethink your worldview .

#### 1026\_ah\_t1\_cwmekk1.json (ah-delta)

(OOV\_comment.begin) Okay , so the Barclay ’s Premier League is an international competition ? Foreigners playing Rugby in Australia makes that an international competition ? Being composed of foreigners does not make something an international competition. A lot of sports leagues have many foreigners playing in them ( Cricket , rugby , soccer , etc . )

(OOV\_comment.begin) I was just arguing your other point. I posted this elsewhere let me know what you think.

Using the Wikipedia entry for nba teams against international competition the world is OOV No nba team has more than 1 loss and no international club has more that 4 wins ( Maccabi Tel Aviv 4-12 ) so extrapolated this into a playoff format , no international club would be anywhere near a playoff OOV If we are to be fair about this they would have to play similar competition and not just allowed into a OOV If that were the case every international team would be obliterated and would n’t make a playoff .

(OOV\_comment.begin) I completely understand what you are OOV I really do. However , I would like to make the OOV that you can not simply declare yourself something based on statistics and OOV The only way to make the claim to World Champion is to have a format that includes other teams in the world. I do not doubt for a second that the NBA teams are the best in the world. My argument , however , is that declaring yourself World Champion without having earned that right through competition undermines the essence of OOV Again , I am not here to argue about the disparity in OOV Sports were invented to compete , and ultimately claim the crown of top OOV Giving yourself an honorary distinction based on nothing more than your superiority and talent pool without having actually played in an international competition or allowing international teams to take part in the play off system some OOV Take soccer for OOV Statistically , Belgium are ranked 3rd in the world. Belgium are a very , very good team. However , they would find it difficult to make it into the final 4 of a world OOV Argentina is ranked number 1 in the world right now , despite losing the WC final last year to Germany ( who are the reigning World Champions ) . So based on statistical probabilities brought to you by the mighty power of the “ OOV World Cup Rankings ” , who is the World Champion ? Argentina , who are statistically ranked number 1 in the world despite losing the WC final , or Germany , who are statistically ranked number 2 despite winning the world cup ? My point with all of that is that you can not crown yourself a champion of something you have n’t earned based on probabilities ( i.e. The Warriors , the reigning champs , are one of the best teams in the world , but they can not call themselves world champions without actually playing in a tournament to represent an international format ) . OOV note : World # 1 Argentina recently lost 2-0 to World # 31 Ecuador , despite the fact that Argentina ( who have their faults ) are the much better team .

#### 1048\_ah\_t1\_dg6irb1.json (ah-delta)

(OOV\_comment.begin) It ’s unfair to place the burden on a person getting OOV This is a classic example of “ repeat player OOV ” Police officers conduct arrests many , many times. For most people getting arrested is a “ once in a lifetime ” experience. They did not have any experience in being arrested , not should they be expected to have such experience. As such , the burden to conduct a safe and efficient arrest should be squarely on the expert ( the police officer ) , not on person being arrested , who can rightfully be expected to scared , confused , and OOV as most people would be in a stressful situation like an arrest , especially their first one .

(OOV\_comment.begin) So the person who has to experience that event constantly should be placed at a greater risk than the person who likely wo n’t experience that event more than 2 or 3 times a lifetime ? That makes

no sense to me. Also being an “ expert ” at arresting people does n’t really do anything for you if they are resisting .

(OOV\_comment\_begin) OOV No , my point is that the person with the experience should be the one responsible for safety of ALL involved. OOV So , according to you , police officers have no OOV on how to safely deal with people resisting arrest ?

### 721\_ah\_t1\_cztoz4x.json (ah–delta)

(OOV\_comment\_begin) If you have more , do already DO give more. It ’s a OOV 10 % of \$ 100 is less than 10 % of \$ 1,000 .

(OOV\_comment\_begin) And the person with a hundred needs that \$ 10 more than the person with a thousand needs the \$ OOV How are you not getting this ? Having them both pay the same rate punished the poor person

(OOV\_comment\_begin) The rate is already low - it ’s not a punishment if it ’s low and OOV Let ’s use the same example : If the rate is considered a “ punishment ” to the poor person at 10 % , is it no longer a punishment just because we ’ve raised the rate of the rich person ? Is it all about relativity then ? “ Oh , he ’s paying more so paying \$ 10 is fine now. ” If that ’s the case , then that reeks of OOV .

### 369\_ah\_t1\_ctgr16w.json (ah–delta)

(OOV\_comment\_begin) For starter ’s I ’d like to apologize for skipping this in your earlier post. I was skimming and only glanced over it OOV I ’m going to try to be as clear as possible. From what I can tell , you ’re saying the ability to reason is what determines if your life is valuable enough to not be OOV If you say this then the consequence is that any animal that ca n’t reason is up for OOV This includes humans who ca n’t reason. The only way for it to not include humans is if you say that humans that ca n’t reason still have something keeping them off the chopping OOV What makes humans that ca n’t reason exceptions other than the fact that they ’re human ?

(OOV\_comment\_begin) ... Really ? Repeating again ... OOV The argument about humans who have deficiencies and/or are under developed is outside the boundaries of the CMV that you OOV It has no bearing on your argument and lies within the boundaries of a ethical OOV That being said , no animal on the planet argues about OOV Humans create boundaries to separate ourselves from animals in many ways , laws are a prime example of how we do that. What you are engaging in right now , trying to convince people and debate with people about the idea surrounding animals and what rights you feel they should be afforded , is a prime example of what separates a sentient being from a OOV I am not going to engage you in a ethical argument that is outside the bounds of what you asked for in your OOV Once again , a small fraction of the human population ca n’t be compared to EVERY OOV Do n’t return to that again. I already gave you what you asked for ( a logical OOV of your theory that recognizing pleasure and pain should confer a right to personhood and by that ethic a right to have people who kill you recognized as murderers ) . If you want to be a vegan , more power to you. However , your theory as to how meat is murder is incorrect as you frame it. I showed you that based on your points being wrong. Once again , either admit you are wrong or change your CMV to reflect your real views and quit shifting goal posts .

(OOV\_comment\_begin) Thank You for repeating the comment that I quoted in my previous OOV This is a short response because I feel like my last question was n’t understood , and this is a very simple way to put it. OOV Why ? You say because humans can reason ? Using your logic we ca n’t derive our first OOV Using your logic if a human ca n’t reason then they can be OOV You ca n’t just say that humans do n’t count because they don’t. You need to give a reason why a human that qualifies to be food OOV You ca n’t just say “ because humans are special ” Using my logic , which is based on consciousness , none of the assumptions are broken .

## 290\_ah\_t1\_dms0ztg.json (ah-delta)

(OOV\_comment\_begin) What ? That 's crazy talk ! ( OOV ) . The five second rule , based on the idea that it takes give seconds for gems to “ find ” the food ? As soon as you drop something , it 's as OOV up as it 's going to get compared with something left on a OOV Yes , each individual instance of food poisoning is rare , but the idea is to establish habits to ensure you never die from contracting one of the many diseases present in the fecal matter that is basically all over streets where your shoes walk .

(OOV\_comment\_begin) Normal people have a thing called immunity that prevents getting sick from eating food that briefly touched the floor .

(OOV\_comment\_begin) So why do n't you eat things covered in shit ? Why is hand washing important ? Why do doctors wash before surgery ? Because it 's disgusting like eating things off the floor is ? If we 're questioning whether things OOV be disgusting at all , we need to look at how they got to be that way. Surely , if immune systems just always protected us from everything , eating something covered in shit should n't be an issue. The thing is , our immune system can protect us from certain infections and not from others. OOV and other gut bacteria are required in our lower digestive tract , so our immune system ca n't attack them. However , if they get into our stomach or mouths , they can make us very OOV OOV is present on sidewalks and OOV Certain

## 282\_ah\_t1\_d2tumxz.json (ah-delta)

(OOV\_comment\_begin) At a base level you are assuming that those with the most common life threatening issue should get priority in some way. If two people have identical risk of imminent death , but one has a common disease and one has a rare disease , should we prioritise one over the other ? if so , which and why ?

(OOV\_comment\_begin) That is hardly the same ballpark ethical decision as to whether or not we should dedicate government funds towards gender reassignment programs or acute care programs. Here 's a question exactly as relevant to the topic for you in return - what is the ideal lubricant for use in a 1984 VW Bug with an original engine that was reconditioned at OOV and has done about OOV KM since then - usually in the dry ?

(OOV\_comment\_begin) The question is a simple thought OOV If two people are otherwise identical in their risk of imminent death , should we treat them any differently based on the frequency of their illness ? If not , what measures should we use to differentiate and focus our efforts , and for what reason ? If someone has a substantial risk of suicide and a medical procedure can reduce this by 90 % , how worthwhile is it ? Assume it was clinical depression , the treatment is an antidepressant and psychotherapy , maybe some OOV For gender OOV it is a surgery , but for the same reason and a similar cost when measured over a longer period .

## 431\_ah\_t1\_dic3ma0.json (ah-delta)

(OOV\_comment\_begin) Okay , an OOV to use ' website would be something like OOV 'Home ' is very visible , much more than it is on OOV Everything your friends post is right in the centre of the screen with all the links in a neat little OOV It 's designed for the everyday person. OOV OOV It 's designed for OOV users from the early OOV As you said , it 's been that way for years. Does Reddit really have an unwritten etiquette ? I have n't had much hostility since I OOV I just talk on here like I talk everywhere else. ” You should be something else. ” Like what ?

(OOV\_comment\_begin) You still seem to think that because you do n't understand something , everyone OOV No one else has a problem with OOV , even new OOV Just because you are too dense to understand the simplest forum layout ever , does not mean it is universally hard to understand , it just means you are new to using it , or OOV OOV Like something that does n't share it 's opinion on things it does n't understand. Or something that realizes just because you do n't understand something does n't mean others do n't understand it too .

(OOV\_comment\_begin) OOV ' ? Are you taking this personally ? OOV 's completely different to most other social media sites in layout and that 's why I said it would be hard to understand. I 'm not spelling it out any more OOV I 've explained it multiple times. Obviously there are people who understand the website or it would be dead. I was just saying why it would be harder for the average newbie to OOV You can make jabs at my intellect all you want , but all your doing is being an example of the sort of OOV users I was talking about. Just because I do n't like or understand the website , or it 's desirability , does n't mean you have to start getting personal .

#### 500\_ah\_t1\_cjin90a.json (ah-delta)

(OOV\_comment\_begin) How exactly is watching the nfl on tv while drinking beer contributing to the health of a sedentary people ?

(OOV\_comment\_begin) OOV , that has nothing to do with my OOV My argument is that MILLIONS of kids grow up playing sports , leading to an active OOV But since you want to OOV an off topic comment here is your answer - [ http : OOV ] ( http : OOV ) . The NFL in the past number of years has put a HUGE marketing campaign to get todays youth more active and OOV Maybe this marketing campaign will reach said beer drinking father and get his kids involved in sports and physical health. Also , growing up and playing sports most people realize they wo n't go pro , but still enjoy playing sports so they join adult rec leagues , college / university rec leagues etc. which help lead to a healthier OOV It 's plain and simple , sports make the world a physically healthier place. You also said SPORTS , not PROFESSIONAL sports .

(OOV\_comment\_begin) I just answered this question somewhere else as well. If watching professional sports has a positive effect on the obesity epidemic , why is obesity still on the rise ? I 'm sure that it may have been confusing , what with the huge amount of resources spent on local sports and school sports programs ( OOV ) , when I did n't specifically say the vast amount of resources poured specifically into professional sports , but most people in the thread gathered what I meant .

#### 1070\_ah\_t1\_di63b9y.json (ah-delta)

(OOV\_comment\_begin) OOV Let me preface this by saying that I do n't consider abortion murder and think that there is virtually no non religious / spiritual justification for the idea that aborting a fetus is OOV But even ignoring that ... I think it 's pretty unreasonable to say that anybody who is adamantly OOV therefore has to be a virgin their entire life and literally never have sex. Birth control methods are very effective , but they are n't perfect. And " just be a virgin your whole life then " would be a significant quality of life OOV If somebody as a child was harmed by a botched medical operation such that they would never be able to have sex , they would win a very large settlement , because that would be considered a major negative from a quality of life point of view. Now , I understand that sounds OOV I am willing to risk ( as you see it ) a person dying just so I can enjoy having sex ? But I doubt your own choices are so innocent either if you really think about them. For example , I assume on a semi regular basis you drive places that are n't critically important ? You drive to the movies , or the park , or to a friends house ? OOV time you do that , you run a small risk of killing a OOV Just like responsible contraceptive use , driving is pretty safe , but not OOV safe. Yet I doubt you would find it reasonable if I told you that you needed to cut driving out of your life to avoid the very small chance of maybe someday killing somebody .

(OOV\_comment\_begin) If you had read further down instead of jumping to conclusions , I cover birth control. To claim being a virgin as a hit to quality of life seems a bit OOV If not derogatory towards the people who choose that OOV I never said do n't enjoy sex , only accept responsibility for your actions. Seems more like you are defending lack of self

control with that premature rant .

(OOV\_comment\_begin) What makes it a rant other than the fact that it was three entire paragraphs long ? OOV I thought I read that clearly , but perhaps you can OOV What specific thing did you say about birth control that my post does not apply to ? I do n't understand where I jumped to OOV OOV Are you serious ? I 'm honestly not trying to be rude , but that 's a ridiculous thing to say. For one thing , very few OOV people CHOOSE to be OOV OOV They may choose to wait until they are ready , or until marriage , or whatever , but very very few with normal sex drives just decide to never have sex. And of those , probably some of them do so out of fear of consequences like STDs or pregnancy or something. I 'm guessing a tiny % of people with " normal " sex drives just say " yeah , I plan to be a virgin my entire life and I feel no unhappiness about that situation at all. " According to this source , only about 1 out of 300 Americans are virgins after age 40 ( https : OOV ) . The very fact that so few people are virgins that old at all ( let alone the fact that many of them are not voluntary and happy with the state of affairs ) seems to contradict what you are OOV And to say never having sex is n't a " hit to quality of life " ... what ? Like I said , I 'm VERY confident that if one 's ability to ever have sex was ruined by a negligently botched medical procedure , one would get a very large payout because it 's pretty much a OOV that that would lead to a significant quality of life OOV OOV OOV means an adamantly OOV person can never have OOV ( if abortions are not available in the use that they are unlucky and responsible use of contraception fails , since it is n't perfect ) I mean while obviously they are n't super common , there are some women who think getting pregnant sounds like a horrible nightmare like being infested with a giant alien OOV Not to mention many men and women but absolutely do n't want children , and / or think they would be very poor parents. You are basically saying " I 'm not saying do n't have sex , I 'm just saying that if you want to have sex , meet these totally unacceptable conditions. " Of course you could argue that unlike the car accident analogy , the taking of the risk ( sex / driving the car ) is a separate stage from then deciding to get an abortion OOV Yet if there were a " OOV 's switch " form of preemptive contraceptive ( designed as a backup to other OOV ) which would abort the fetus some number of weeks in the first trimester ( if a pregnancy occurred because the condom broke or whatever ) , I doubt you would be ok with that. OOV Why do you show a lack of self control when you drive you car to the movies or a friend 's house even though you know there is a small chance there could be a car accident and you could kill somebody ?

#### 967\_ah\_t1\_dnagn35.json (ah-delta)

(OOV\_comment\_begin) I said the supreme court was the most powerful in regards to domestic policy. In regards to foreign policy , the president is the most powerful .

(OOV\_comment\_begin) And somehow that proves that a simple majority of 51 % in Congress is n't dangerous , and that executive orders do n't carry too much weight ? Complete straw man .

(OOV\_comment\_begin) You are handing that power to a simple majority of a bunch of unelected individuals , which is easier to abuse than either of those things

#### 1270\_ah\_t1\_d276ao7.json (ah-delta)

(OOV\_comment\_begin) I do not believe that altruism does not exist , no .

(OOV\_comment\_begin) You got a double negative there : " do not believe " + " does not exist " . If we took them out your sentence , it would sound like this : " No , I believe that altruism OOV " But answering no is an odd way to answer my question if you do believe people can be OOV So , I am hoping that you could be OOV Do you believe that people can have altruistic motivations at all : yes or no ? Now , saying that you do n't think people can be altruistic does not necessarily commit you to OOV , as you might think there is a middle ground. SO , do you think ultimately people are always motivated my selfish reasons ? E : grammar



and stuff

(OOV\_comment\_begin) Really ? You want to OOV about semantics when you fully understand what I OOV OOV OOV Yes , OOV is something that believe exists , but it has nothing to do with your reasons for something. You can believe you are doing something selfishly which is in fact altruistic , and you can believe something is altruistic which is in fact selfish .

#### 471\_ah\_t1\_cuueg7y.json (ah-delta)

(OOV\_comment\_begin) If I understand correctly , it is questionable whether the Flynn effect is still ongoing in developed countries. Some recent studies even shown a decrease of average IQ : https : OOV # OOV

(OOV\_comment\_begin) It may reach a peak , but there 's certainly no evidence to suggest that we 'd see the opposite results ( where societies progressively kept getting dumber by the generations ) .

(OOV\_comment\_begin) Did you miss the point where some recent study find a decrease ? This may be due to immigration rather than OOV selection , but it 's still there .

#### 934\_ah\_t1\_cjylm1k.json (ah-delta)

(OOV\_comment\_begin) Work has little to no inherent value , though. Should OOV % leisure time not be an ultimate goal of society ?

(OOV\_comment\_begin) Sure , that 's why we need to get away from the capitalist economic model. Capitalism needs to continually expand to feed the greed ( profit ) of the OOV It forces people to work , even if that work is not productive .

(OOV\_comment\_begin) So that being established : would you rather work a 50 hour workweek in 1914 with the amount of OOV that entails , or a 25 hour workweek in 2014 with the amount of OOV that entails ? It seems pretty clear to me that quality of life has risen for everyone in OOV nations , despite income inequality .

#### 297\_ah\_t1\_ckzb2i2.json (ah-delta)

(OOV\_comment\_begin) It 's a shame it wo n't work , but if people are going to get the wrong idea and fail , in what way do you want people to fail ? I 'd prefer people were kind and generous seeking a false ideal than narcissistic OOV I noticed in your final sentence you listed " be generous " before " be confident " . Is this your priority ? Currently , it is n't the priority for a person seeking to be attractive to women .

(OOV\_comment\_begin) I do n't " want " people to OOV I 'd rather people grow , learn , and eventually become well rounded OOV OOV You can be both. You can be confident without being some OOV OOV in a club every night.

You can be generous without being a walking tampon soaking up everyone elses issues. Takes maybe 30 minutes a day to get in pretty decent shape if you want to attract more women physically or just be in good physical condition. Takes maybe a few hours a month to volunteer at various places or charities to be a generous and caring OOV Do both .

(OOV\_comment\_begin) People are going to OOV That 's why the word " fail " OOV You can be all of the above and so many other things , but when it comes to giving advice , there are going to have to be OOV Where do you want the priorities to be ?

#### 538\_ah\_t1\_d5qtk6v.json (ah-delta)

(OOV\_comment\_begin) And yet he thinks the pyramids were grain OOV How many nuclear engineers feel the same ?

(OOV\_comment\_begin) As I said in the OP , you can be absolutely brilliant and still believe dumb things .

(OOV\_comment\_begin) But that 's the thing , I OOV I do n't think he is a brilliant man. I think he 's a brilliant OOV He is slow in speech , has a general lack of knowledge on pretty much anything , and seems almost entirely unaware of himself ( for example : telling a story where he OOV to trying to stab a OOV as as an example of the goodness of God or fate or some bull ) . Just like OOV He 's made more money than God. He 's a brilliant businessman , but hardly a brilliant man .

### 399\_ah\_t1\_ctped5j.json (ah-delta)

(OOV\_comment\_begin) I have read your OOV They try to lump atheists under this one banner and it makes no sense. Was your tip my fedora comment your attempt to insult me ?

(OOV\_comment\_begin) Here let 's read this together then. I said OOV You said OOV I could literally do a simple google search and find thousands upon thousands of atheist clubs , forums , groups , discussion boards , etc. Just because YOU personally do n't do something does n't mean that if we are talking about atheists as a group generality that YOUR PERSONAL OOV need to displace the habits of millions of other people. The same argument from the opposite perspective is that just because I am a theist that does n't like the concept of forcing my spiritual views on other people does n't mean that there are n't millions that do believe in doing so. I am not part of that group , but that does n't mean when talking about religious individuals in general that I can not argue for a characteristic of enforced beliefs among various groups .

(OOV\_comment\_begin) You also see a bunch a book clubs and quilting clubs and pick up basketball games. If I go camping with a group of people is my religion now a OOV Is my mother a OOV ? Does my sister run a cult because she writes a mommy blog ? Humans are social OOV We do things OOV That 's what we do , but you ca n't just throw the label of religious gathering or faith based gathering on a group of people and call it a day .

### 1033\_ah\_t1\_df80y7e.json (ah-delta)

(OOV\_comment\_begin) No , its the general antagonistic and tribal attitude that the political sides have towards each other in schools. Because these are children , they lack the ability to OOV with other people 's points of view which leads to bullying and OOV I cited the OOV because it is something that would never happen in a neutral establishment , and I can prove it with evidence .

(OOV\_comment\_begin) I 'd like more evidence that this is wide OOV Typically people that use the term OOV do n't have a real grasp on what reality is and think isolated incidents are some bigger issue. This is also seen with this conservative OOV Conservatives cry and cry about being victims but I do n't believe it for one second

(OOV\_comment\_begin) OOV basically means anybody who groups people based on race or gender in an attempt to say that one is " more oppressed " and in turn more deserving of privileges like affirmative action. A normal person would agree with Martin Luther King that we should judge based on content of character while an OOV would say that that is an over simplistic view that ignores years of oppression and we need to remember to treat oppressed OOV better than the ones who are not OOV Basically OOV want equal outcome while others want equal opportunity. I get why you see people who use this term as OOV alt right fascists , because many actually are , but I use it because I want an actual liberal party in the United States and not one that believes in treating one race different from another like I believe the Democrats do .

### 867\_ah\_t1\_cxaffhk.json (ah-delta)

(OOV\_comment\_begin) People who carelessly throw around that term do n't tend to get laughs , any more than they laugh when called rape apologists , OOV , or patriarchal OOV You argued that the use of the term OOV and OOV are OOV If tons of people who are mature adults with social authority and power use the terms it clearly is n't immature .

(OOV\_comment\_begin) Just because someone is a " mature adult with social authority and power " does n't mean they are the perfect apex of humanity and everything they do is moral and proper .

(OOV\_comment\_begin) I agree with that. I am glad I changed your view on such people being mature OOV May I have a delta ? It is a worthy point. People can be intelligent , mature OOV and still be immoral .

## 109\_ah\_t1\_cuu8gko.json (ah-delta)

(OOV\_comment\_begin) OOV : Before you post another list of who disagrees with me , please read my responses already. Trying to change my mind by pointing out that people disagree with me is not a good way to change my mind. I OOV OOV people disagree with me. That 's why I posted this , in the first OOV Edit 2 : OOV pointed out its usage in bounties for Native Americans in the late 19th century , similar to how “ Jap ” got much of its negative connotation from widespread American propaganda in OOV So if someone could expand on that and give some more examples or resources that could put my opinion in that direction , it would be much OOV And please remember that the OOV button is not for disagreeing with OOV In fact , OOV someone just because you disagree with someone in OOV is counter to the intention of the sub , and if you do so , you 're just a coward who ca n't actually form an OOV - - ( Please note that I said “ I do n't think they should ” rather than “ I think they OOV ” I do n't really have a strong conviction one way or the other right now. ) Fair warning : I 'm gon na use some slurs in this , but please know that I 'm not calling anyone one or the other. I 'm just using them as examples of offensive slurs without dancing around them. Like I said , I do n't currently think that “ The Washington Redskins ” is offensive , and thus I do n't think they should be pressured to change it. I 'm not so sure “ OOV ” is a OOV I have heard some natives say that it 's not , and some say it is. I do n't have enough knowledge of a history of the word being used in a pejorative fashion in a widespread manner , such as “ OOV , ” “ chink , ” etc. have. I OOV think that if a team were to have an inherently offensive name ( such as the “ Kansas City OOV ” or something like that ) , even if the word was n't offensive when they started ( such as how “ Jap ” became offensive in the 40s despite being innocuous beforehand ) , they should change their name. The Washington Redskins ' name came from when the Boston Braves had their name changed to the Boston Redskins to avoid being confused with the Braves baseball team , while still having the connotation of Native American OOV Clearly back then it was not offensive , and the owner of the team most likely did not hate natives , either. After all , the head coach at was a Native OOV So , that 's about it. I do n't think that “ OOV ” is inherently disparaging , and the team was obviously not named “ The Redskins ” with any malicious OOV Therefore I do n't see a good reason to force them to change it. However , if someone could convince me that “ OOV ” is an inherently offensive word now , on the levels of “ OOV , ” “ chink , ” etc. , then I 'll think otherwise. CMV .

(OOV\_comment\_begin) [ removed ]

(OOV\_comment\_begin) OOV Rule 1. OOV Rule 3 .

## 566\_ah\_t1\_cmql1ea.json (ah-delta)

(OOV\_comment\_begin) OOV This argument has never made much sense to me. Taxes are legitimate because you went to public schools ; but the government \*required\* that I go to school. I never had a choice in the matter. Does n't that seem like circular reasoning to you ? It 's like saying “ taxes are legitimate because the government protects you from the gays ” ( by spending resources on enforcing gay marriage bans ) . Okay , well , what if I think bans on gay marriage are a violation of civil liberties ? Or taxes are legitimate because the police provide you security ; yeah , they also needlessly beat petty criminals , kill unarmed teens , and lie under OOV But I would n't be able to reap the benefits of a corrupt police force without taxes , so I guess I 'm indebted to the government from OOV Using your logic , we could use OOV government expenditure to justify taxes. Even “ the government protected you from terrorists by torturing POWs ” . While it may in fact be true , does it not matter that I find torture morally reprehensible ?

(OOV\_comment\_begin) OOV Yes , because uneducated people are not useful to society compared to educated people. Everyone benefits from having public schools , even if you did n't go to one , you still reap the rewards of having an educated OOV Everyone benefits from having reasonable law and order in their homes and communities , this allows for better , more efficient work. Everyone benefits from roads , this needs no OOV So , even if you went your whole life without going to public schools , and never dealing with the police , your life is still OOV impacted by the fact that those things exist. They have been agreed upon by the majority of societies that they are for the best of all people ( correctly so ) and as such , are

no longer up for debate on whether or not we should pay for them .

(OOV\_comment\_begin) OOV No reason they need to be public. If all schools were private , I sure as hell would n't have to fight so hard to make sure my kid learns about evolution and sex education. OOV Sure , but the definition of “ reasonable ” is up for debate ( I would argue that the law enforcement I 've been paying for IS N'T ) . OOV You think roads just would n't exist without taxes ? OOV OOV , OOV OOV ( EDIT : or rather , we do n't know if the impact is positive because the alternative option is unknown. I assume you think the only alternative is apocalyptic OOV ) OOV Maybe at one point that was the right call. But the public schools have gone to shit , law enforcement completely disregards our civil liberties and is no longer accountable to the general public ... and I think that just might have something to do with people like you thinking it 's “ no longer up for debate ” . ( hint : it 's OOV up for debate unless you 're an OOV ... )

#### 1146\_ah\_t1\_cs8nx3q.json (ah-delta)

(OOV\_comment\_begin) OOV How would you even know if you can or not , you 've been with 2.5 people .

(OOV\_comment\_begin) Are you trying to troll ? Really , your responses OOV my mind. Relationships enter different OOV The first few weeks to months can last purely on OOV OOV the two people decide they like each other and want to pursue an actual relationship , they 're still in a honeymoon OOV The honeymoon phase lasts for about two years. It 's when two people are basically in puppy love. They text all the time and think about each other all the time. Their might be even be passionate fighting and jealousy and lots of OOV Most relationships end with the honeymoon stage. To make a relationship work beyond that , it takes two people not just committed to each other , but to the relationship itself. Even when you 're tired and frustrated , you need to trust that your partner also wants to make it work. You need to work on not assuming they say or do anything to hurt you. You need to make decisions that do n't just benefit you , but your partner as well. There are a lot of joint decisions , and decisions are made with the assumption you will be together in the future. Finances are OOV Decisions about careers are OOV Decisions about children are OOV It can only work because you trust the other person is working just as hard for the relationship as you. If you want a long-term relationship , a relationship that lasts more than the 2-3 years of a honeymoon relationship , then I do n't think your first choice in a partner should be someone who has dated 50 people for an average of OOV OOV This , to me , signals the person is n't even waiting around long enough to know the person at all. They 're basically in it for the most exciting time sexually , and then they 're gone ( I 'd assume to find their next partner ) . So , if I wanted a relationship , why would I waste my time on a person who is n't even interested in getting to know their partners ? I would be a fool to think my “ relationship ” with them would last more than about two months. It would be a little fling , and that would be that. I would n't even waste my time allowing myself to explore any possible feelings for someone who had 50+ OOV Of course , that does n't mean people do n't enjoy OOV Two people who are single and want a fling should totally go for it. But I know I would n't be interested in trying to develop a relationship with a person who wants a OOV That would be a waste of time .

(OOV\_comment\_begin) You 've been in three relationships and you feel like you can write paragraphs about it and judge those whose who has had over 10 times that many short-term OOV OOV Telling me about “ flings ” when you 've actually tried about one fling , so I do n't see why you get to use the plural .

#### 364\_ah\_t1\_djrw4mp.json (ah-delta)

(OOV\_comment\_begin) OOV may be the wrong term but it certainly does n't support what you OOV “ Although the sample was too small to identify any gender differences in development , OOV expects to see differences developing in the brain by 2 or 3 years of age . “

(OOV\_comment\_begin) They are currently performing a study in which they monitor 2-3 year olds for differences in brain development. Due to its rarity unless they are extremely lucky they will need to monitor hundreds if not thousands of children before they find one with a OOV OOV Since currently the sample size of the study is too small then , has expected , it as not yielded any fruitful results. What exactly do you not understand ? Studies are n't done overnight , they take time and OOV The fact that the brain structure is identifiable in 5 year olds proves that it starts developing before the age of 5 and is expected to be identifiable as young as the age of 2 .

(OOV\_comment\_begin) Then I guess we will have to wait a while to confirm the original commenter 's point ! What do you not understand about the study not being completed ? I guess I should 've specified a finished

and published study. Edit : To be clear , it does n't matter what the OOV " expects to see " .

#### 886\_ah\_t1\_de976m1.json (ah-delta)

(OOV\_comment\_begin) I 'm OOV myself but people often perceive me as male , and I literally can not deal with the thought of mixed gender public OOV I 'm surprised that so many OOV presenting people are okay with this. If you think about it for five minutes you can see if it 's a really bad idea. Just ... No. No no no no. I do n't care what people say about " not all women " . That 's a risk I really do n't want to have to OOV Even 1 out of 500 women being a predator is way too OOV I understand it can be really OOV for trans women to use the men 's room , and by all means use whatever bathroom you want. I 'll be the first person advocating for their right to do this. But I think it should be a personal decision. With all the predators and hateful people out there , I would n't even think of using the women 's room unless I passed 110 % that day and honestly I fear for some of my friends who do this .

(OOV\_comment\_begin) To whoever down voted me : OOV ... So if I flip the gender in the statement , and that makes you uncomfortable , that 's MY fault right ? ; sarcasm ; It 's OOV ok bash on men , and claim that 1 out of 500 men ( or more ! ) is a predator , but if someone even dares to say OOV the same words , but about women , instead of men , that person should be silenced ! ; OOV ; Perhaps , just maybe , it is YOU who should check their privilege ?

(OOV\_comment\_begin) Men who get upset about people generalizing that they 're dangerous will never be equivalent to women getting upset about the possibility of getting raped

#### 989\_ah\_t1\_dk2sc4u.json (ah-delta)

(OOV\_comment\_begin) If you literally said that , I would n't have needed to OOV That 's what I read in your comment , though , that the concepts of profit and benefitting people are mutually OOV Why ca n't healthcare ethically be a business unless that 's what you mean ?

(OOV\_comment\_begin) Because you 're letting people suffer and die even though you have the means to help them , but refuse because it does n't increase profits ? Just to be clear , when I say business , I mean " for-profit " business. As in , profit is # 1 , everything comes second .

(OOV\_comment\_begin) So let 's go back to what I originally asked you then. Are you claiming that a for-profit business can not , by definition , be ethical because " profit is # 1 " ? Do you not believe that OOV and profit can ( and do ) go hand-in-hand in many cases ? When your business model is built on helping people , then the more you help people , the more money you will make. When your success is built on a reputation of being an ethical company , then remaining ethical makes you more money. I think your equation of profit with greed and evil is misguided and juvenile .

#### 1131\_ah\_t1\_de2004s.json (ah-delta)

(OOV\_comment\_begin) When there is a strong case from a public health perspective , yes ... we do. We do n't have that here. Yes , I 'm saying that you 're suggesting that the risks of the procedure itself are NOT considered in the conclusions the pediatrics OOV made about circumcision 's conclusion that it 's a net benefit from a health OOV They are OOV FGM is much more complicated though , right ? It 's wrapped up on issues of social control of women , in the termination of a sexual capacity , in a wholesale different level of health OOV We often try to draw some equivalency in these procedures because the parts sit between our legs and we keep them covered in public , but they are n't really analogues from a medical and social and cultural OOV I do n't see any reason to OOV first then allow OOV If you grant religious reasons , then why not just say " do it if you want to " ? I fail to see any meaningful difference in that policy other than the volume of paperwork and the babysitting of parents .

(OOV\_comment\_begin) OOV This is an extremely biased conclusion based on American and Jewish traditions of circumcision ( which are based on preventing masturbation ) . All the OOV studies tend to be done by ( Jewish ) OOV doctors



and OOV European doctors reach the opposite conclusion .

(OOV\_comment\_begin) This reads like a propaganda message from the OOV OOV Firstly , how is it biased to say that a study accounts for medical harm from the procedure ? It 's not particularly contentious that it OOV account for OOV OOV 'll assume you mean something broader than what you OOV I - for one - do not dismiss medical research based on ethnic background of the doctor , but rather look at the merits and quality of the methods used and analysis OOV One can equally paint - should one choose to play on your field - to see OOV and homophobia in the european findings ( which ... by the way , are n't really medical findings based on study but have been handled in legislature and courts ) . Moreover , you ca n't claim bias on one side and not on the other - it 's not like European men are neutral with regards to circumcision , they really do n't want their sons to be OOV and they really do n't want to look jewish or OOV OOV is an absurd , and outlandish argument without any OOV Further , there is essentially zero European research on the topic , and nothing even close to the research underpinning the am pediatric OOV review. All that said , the conclusion that is reasonable is that medical perspective does n't tell us one way or another. so ... why should n't parents then get to decide ?

#### 56\_ah\_t1\_ckhaab4.json (ah-delta)

(OOV\_comment\_begin) No I really do n't know the answer. As an aside , I do agree that a father is obligated to pay for their progeny , but that 's only because they are culpable for the child. On your view , where fairness is n't a consideration , I see no compelling reason why that might be the case .

(OOV\_comment\_begin) OOV That 's a bit sad then. OOV The " fairness " we are speaking of would be an exact , tit for tat , absolute OOV OOV between the father and mother , not an overarching " just world " sense of OOV OOV Then you OOV n't be trying very hard .

(OOV\_comment\_begin) You should give arguments instead of just commenting on my personal character. Sans the father being culpable for his progeny , what compelling reason is there to compel him , as opposed to any other person or set of people to pay for his child ? I 'm not saying that the father should n't be the one to pay , I 'm saying that " the good of the child " is not solely sufficient for choosing the father , as opposed to anyone else. Of course I think there are other reasons ( like the father being culpable ) for him to pay , but your first response argued that the good of the child was OOV sufficient for the father to be the one to OOV Cut out the nastiness and have an argument please .

#### 807\_ah\_t1\_cj28ab0.json (ah-delta)

(OOV\_comment\_begin) there is already a shortage , as described above , govt regulates how many hospitals there are , and where they can be built etc.. why is a shortage only a problem when a few doctors go on strike ? take another example as posted OOV OOV when a snowstorm hits and wipes power out over a large area for example , there is a shortage of workers in that area all of a sudden ( as there is now much more work to do ) we see it every time a huge storm OOV and what happens ? - workers come from neighboring areas to help out ... the same principle applies to any other area of work.. if there is work to do , workers from surrounding areas will all pitch in to do it. We 've seen it in action , it 's not a hypothetical

(OOV\_comment\_begin) depends on how many " a few " is really

(OOV\_comment\_begin) well , Drs generally have their own OOV so it 's not very realistic for them to all decide to go on strike ... they are basically their own boss , so I do n't know under what circumstances they would decide to all just go on strike against themselves

### 152\_ah\_t1\_d54pxfi.json (ah-delta)

(OOV\_comment\_begin) I think that [ this blog does a good job of explaining it ] ( http : OOV ) particularly with this excerpt : OOV OOV OOV OOV OOV OOV He goes on to talk about how a lot of cis guys do n't necessarily have a strong gender identity , and so these are the sorts of people to whom OOV people are confusing ; I do n't feel particularly masculine , and I ca n't imagine my world being shattered if I woke up one day and found that I was a female ( granted , the social differences would be weird , but I do n't think that OOV the mere fact that I had OOV instead of OOV would be horribly off-putting ) , and so I had a hard time relating to OOV people , because the idea of feeling like any gender was just odd to me .

(OOV\_comment\_begin) What about the fact that OOV still OOV themselves ? Look up tranny suicide OOV Sex changes are not the solution

(OOV\_comment\_begin) What about the fact that OOV people still kill themselves ? There are a OOV of other factors that go into someone committing suicide , and chances are that someone who calls them “ tranny ” is at least a minor contributing factor in the overarching statistic of the suicides of trans individuals .

### 916\_ah\_t1\_ddx388z.json (ah-delta)

(OOV\_comment\_begin) Prevent the normalization of his views through any way possible and give them absolutely no platform to OOV Sometimes that involves violence , and that 's definitely the part of OOV that gets the largest attention of the media , but most times it 's teaching those on the fence why we do what we do , and why fascism is not a legitimate political ideology to hold or OOV Education is the largest part of OOV , we just do n't extend it to fascists who try to spread their cancer .

(OOV\_comment\_begin) I just realized the point of Punch A OOV Tell me if I 'm wrong. It 's to OOV the people on the OOV Not to convince them but to scare them. Like the way you convinced everyone that the N word ca n't be said. You 're not about education. You 're about control. The problem is that that results in Trump getting OOV Trying to silence the people you disagree with does n't win the war. It 's bullying ( well intentioned as I 'm sure you see it to be ) but it creates a reaction and you 're living that reaction now. And your solution to the hole you 've dug is to dig harder .

(OOV\_comment\_begin) No its to scare OOV and show minorities that people will fight for them. If that scares white liberals because we 're not well behaved or something then so be it. Fascism wo n't just stop itself .

### 921\_ah\_t1\_d0aho3t.json (ah-delta)

(OOV\_comment\_begin) It 's totally unreasonable to assume that everyone who might want to make out in private with you also automatically wants to have sex with you. How hard is it to ask someone if they 're up for sex ?

(OOV\_comment\_begin) OOV I think you OOV this , because you 've just described a rather explicit OOV Unless they started going “ no no no , ” nobody will stop to ask for OOV That 's a turn off .

(OOV\_comment\_begin) That was not OOV Would never assume that anyone was down for sex just because they were down for kissing , and I do n't think sexual situations are so delicate that asking for consent is a turnoff .

### 864\_ah\_t1\_dkc8t2v.json (ah-delta)

(OOV\_comment\_begin) Despite the word “ elevate , ” you can see clearly in the context of the email that DNC wanted to show that all the GOP candidates were as extreme as these three extreme candidates so they wanted to make all GOP candidates associated with the messages of those three OOV They were not trying to help those three candidates actually

win the election , as you suggested , but rather they wanted to elevate \*the OOV of those three candidates to make voters think of OOV GOP candidates the way they think of those three .

(OOV\_comment\_begin) No you totally OOV I did not suggest they wanted to help a republican win. I am saying they named three candidates specifically , and acted to try to push them into the spotlight on purpose because they assumed they would be easiest to OOV They did such a good job of this , that one of them actually won .

(OOV\_comment\_begin) Which again is exactly not what they were doing at all. They were trying to associate every single candidate 's message with the message of those OOV OOV That is pure total OOV They said right there in the email why they were doing this and what their goal was. It was OOV to make one of those candidates the final candidate because they were assumed to be easiest to OOV It was to make all GOP candidates associated with those candidates and get all GOP candidates to lock themselves into promising far-right things .

#### 556\_ah\_t1\_cj881af.json (ah-delta)

(OOV\_comment\_begin) OOV That does n't hold true in cases of OOV If someone takes a swing at my head and I push them away , it does n't matter where I push them because no court on earth is going to call that sexual OOV OOV pull women off men and each other all the time. When was the last time you saw one of them get sued for sexual assault for breaking up a fight ? OOV OOV You really do n't understand how this works at all , do you ? OOV someone 's ass is an entirely different OOV “ Yeah , they beat me with a tire OOV One of his swings hit me in the butt cheek , so yeah he sexually assaulted me. ” Good luck with that .

(OOV\_comment\_begin) You do n't seem to understand that courts treat these events OOV They 'd go through the assault charges , and come to a OOV Afterwards , they would then consider if Any sexual assault occurred during the event in question. Now , in the case of your bouncer example : it took Google OOV second to bring me six examples of bouncers being sued or arrested for sexual OOV Not counting the dozens of bouncers complaining they lost their jobs because of alleged sexual OOV So ... yeah that happens a lot. The point of law suits or criminal charges is n't necessarily too get the person OOV Getting arrested or sued for sexual assault is bad enough to ruin most people 's lives. Guilty or not , violently hugging a woman can lead to sexual assault charges or OOV That is reality. Is it fair or common sense ? No. Does that mean they 're never successful ? No. You seem to believe that lawyers ca n't do their jobs well. It only takes two or three cases of someone getting successfully tried for sexual assault during an assault to give precedence for a OOV There exist convictions of this nature , ergo it CAN happen. I realize you do n't like it , but I 'm sure you did n't like the outcome of the Zimmerman trial or the OJ Simpson trial , or many divorce settlements , but they all happen. Courts are more complicated than just “ she hit me , therefore I could grab her ass accidentally in a fight. ” “ Oh , jolly good , you 're a free man ! ”

(OOV\_comment\_begin) OOV That statement perfectly encapsulates the ridiculous nature of that entire post. I do n't know what kind of restraint you have seen , but it 's clearly different than what I was talking about because 1 ) “ violently hugging a woman ” is not OOV Violence and restraint are almost directly at odds with each other by OOV 2 ) OOV Such a twisted way of presenting that. “ Most people ” ? Not even OOV The only way other people even find out about it is if it gains media attention , and that 's easily less than 1/2 of cases , or if you get OOV OOV More speculation drawn from OOV OOV But those convictions are circumstantial , and that 's something that a “ good ” lawyer would be aware of and work around in a trial. It 's not as simple as “ In the case of \_\_\_\_ vs \_\_\_\_ , someone trying to break up a fight was convicted of sexual assault so this guy is guilty too ” which seems to be the case you are making here. OOV It 's not that I do n't like it , it 's that the way you presented it is 100 % bullshit .

#### 457\_ah\_t1\_dhdlxij.json (ah-delta)

(OOV\_comment\_begin) That 's fine that you might not care but a good portion of any society is going to , which means in a democratic society you 're going to be OOV ... also , depending on the job you have you 'll care shortly ... (OOV\_comment\_begin) It is n't government 's job to make sure everyone has work. That 's the market 's job. I would

bet every penny in my pocket that this country will not approve of OOV in my OOV We have about half the population taking issue with progressive income taxes ! I 'm a divorce and criminal lawyer , my job will be one of the last given to machines .

(OOV\_comment\_begin) I never said it was governments job ... however , as long as we 're going to willy-nilly keep breeding than it IS societies job to supply work so that they can survive ... My ex was a lawyer , and the current OOV curve for lawyers is completely overrun with lawyers and not enough work : https : OOV and https : OOV and https : OOV and https : OOV # OOV so I have absolutely no idea what you 're arguing because even the ABA admits there 's too many lawyers and has in particular told students to NOT pursue a law career : https : OOV # OOV http : OOV http : OOV although IN THE PAST it was a great growing industry ... the ABA itself says there are too many lawyers and there 's not enough work , and when you begin to include AI workers like : https : OOV then you can easily see that the entire lawyer procedure or at least all of the law clerks etc. are going to be replaced by computers ... there will only be a few cases decided each year that were n't already analyzed by some sort of law AI ...

### 8\_ah\_t1\_daser9z.json (ah-delta)

(OOV\_comment\_begin) OOV Because the selection committee very specifically was established to be biased towards selecting conference champions , and only selecting non conference champions “ under circumstances where that particular OOV or independent is unequivocally one of the four best teams in the country ” As I said , I think OOV are all strong OOV I do n't think any one of them is “ unequivocally ” better. And therefore , the selection should go to the conference champion .

(OOV\_comment\_begin) OOV Source ? And clearly the opinion of the committee is that Ohio State is OOV one of the four best teams in the country. You may disagree , but I think that the vast , vast majority of people believe that Ohio State would have a much better shot to beat Alabama than Penn State OOV Penn State is n't being compared to Ohio State for the same reason that undefeated conference champion Western Michigan is n't being compared to Ohio State or Washington or anyone in the playoff field : because in the eyes of the committee those teams are clearly better than Western Michigan .

(OOV\_comment\_begin) OOV It 's part of the document I linked in my OOV [ Adding it again here ] ( http : OOV ) OOV I know. The entire point of this CMV is to try and convince me to see it from their point of view. I disagree with them , thus the CMV

### 679\_ah\_t1\_ddb3oyh.json (ah-delta)

(OOV\_comment\_begin) Why do you think I am not sincere ?

(OOV\_comment\_begin) Because of responses like : OOV and OOV and OOV and so on , in the context of a combative and “ I do n't believe you ” OOV The point being , that comments like the above indicate very clearly that you are out of your depth , that you should n't have any strong opinion about any of this. Which is totally cool and fine on its own , and if you want to learn more , come on over to OOV or something if you have questions. But you should know better than to maintain such an attitude in the face of such clear evidence that you need to sort of start from the beginning and learn the basics of this subject matter .

(OOV\_comment\_begin) Fair enough. If you ever want to ask me questions about speech recognition in pronunciation assessment for OOV remediation in language learning , I promise not to insult the gaps in your understanding , even if you are suggesting that there is a superior method to what I 'm using at the time. And I certainly am not going to tell you that your preference for a viable technique is like saying the liver is an olfactory organ when discredited techniques are getting far more undeserved press .

### 621\_ah\_t1\_ctsnska.json (ah-delta)

(OOV\_comment\_begin) Meh , it 's failed everywhere it 's been OOV Perhaps we 're not as cooperative as you think we are. Your conversation with OOV does n't show much OOV I 'd still like to see what OOV has to say about my comment above .

(OOV\_comment\_begin) OOV Communism has never been implemented ... OOV People respond to their environment. Outside of this economy I find many people to be very OOV It 's always been a few that imposes on the rest of us , and too many of the rest of us can do nothing but OOV I want us all to OOV OOV So you think “ camaraderie ” means allowing OOV to suffer and force others to suffer ?

(OOV\_comment\_begin) OOV We 've come full circle already. I 'd like to bring your attention to something I wrote in my first comment : But there are those who say that it was n't implemented correctly , and all that. OOV I do n't know whether they 're suffering and I did n't see you asking them anything about it. I 'm out. If you need to , feel free to have the last word .

### 522\_ah\_t1\_dlvwppe.json (ah-delta)

(OOV\_comment\_begin) No , you just appear to have taken a piss poor OOV I ca n't imagine why over a simple OOV I did read your post. I just do n't happen to see what you 're trying to say. If you KNEW your response was n't going to be helpful , do not OOV Or , once you heard that the information you had was incorrect , as I tried to bring to your attention , you could 've updated your post to say so. It seems as though , you KNEW you were n't going off of updated information , therefor leaving your response pretty damn OOV It 's really quite simple. I agree that OP could 've worded it differently , but that 's about it .

(OOV\_comment\_begin) OOV You OOV That much is OOV OOV So you think that everyone should have OOV conceivable facts at their disposal , they should know all the OOV , the unknowns , and all the unknown unknowns before they post , or they just should n't bother ? Well OOV I 'm sorry I ca n't live up to your standard of OOV OOV Again , you did n't read my post , because I pointed out that your factual errors regarding what I said meant that there was , in essence , nothing that you could bring to my attention that was worth knowing until you corrected your error. Which you still have n't done. OOV Again , I 'm OOV sorry that I do not know all that there is to know in the OOV It must be so difficult for you , having to deal with us mere OOV Tell me , what DID you do to relax on the seventh day ?

(OOV\_comment\_begin) I merely corrected you. You saying that “ you ca n't be held accountable ” if other details came out is OOV It 's saying that you ca n't be bothered to be corrected should someone have the answer for you. No need to be as angry as you are over being corrected .

### 557\_ah\_t1\_d3s3i1q.json (ah-delta)

(OOV\_comment\_begin) I do , but we do n't ( in seriousness ) talk about political issues at length , I 'm rather contrarian in my views compared to my POC friends .

(OOV\_comment\_begin) Do they not enjoy OOV racist jokes as much as you , either ?

(OOV\_comment\_begin) : O ... OOV OOV OOV ?

### 726\_ah\_t1\_djru4x6.json (ah-delta)

(OOV\_comment\_begin) OOV I do n't agree with this at all. Gender does n't “ just happen ” to match biological sex 99.9 % of the time without any sort of reason. OOV Does not imply that there are genders in OOV I guess maybe there 's an argument for a single third distinct “ gender ” which would just be “ trans ” , but there 's no evidence for any other definite point in OOV Scientists ca n't look at someones brain and be like : “ This is the brain of



a OOV ” and then another similar brain and also say : “ This is also the brain of a OOV ” . They can tell it ’s the brain of a OOV , but that ’s about where it OOV OOV Why ? If they do n’t have a legitimate reason ( as in , nothing is different about them compared to a OOV ) , does that not OOV the struggle of actual trans people ?

(OOV\_comment\_begin) Actually , we know for a fact that gender is a social construct because there are societies with more than two genders , with at least one having a total of OOV I ’d say it ’s wrong to say there are genders ’in between ’ male and female , the genders are simply different , and some do n’t have a concept of male and female at all. OOV only happen to match biological sex 99 % of the time in societies in which genders were designed to match biological sex , but even in these societies we see an enormous variation within each OOV We even have females who identify as women dressing and acting as males and vice versa , and I can honestly admit I have personally mistaken the OOV of two different OOV ’ people due to their choice of style. You have to understand that the modern western concept of gender identity where genders are either man or woman is just one more gender system among hundreds or even thousands that has simply been spread by the conquering of other OOV For example , the [ Native Americans ] ( https : OOV # OOV ) had a three gender system , guess what happened to their system as their culture was eliminated ? Just because Europeans had bigger armies does n’t mean they were right when it comes to gender .

(OOV\_comment\_begin) OOV Example ? OOV such as OOV OOV And ? there ’s nothing wrong with that. Does n’t change the fact that a boy who likes OOV dolls is still a OOV A stay at home father is still a man. Unless you want to adopt a system of gender in which 50+ % of the population would become trans as a result , none of this is logical .

#### 61\_ah\_t1\_d0ak0os.json (ah–delta)

(OOV\_comment\_begin) that ’s only half true. while you would likely see a overall decrease of the average wait time , this would be achieved with a moderate decrease in wait time for women and a heavy increase in wait time for men. i understand why most guys here are n’t thrilled about it. add to that that women bathrooms have the tendency to become a absolute mess over time ...

(OOV\_comment\_begin) So basically you like the OOV treatment for men .

(OOV\_comment\_begin) as a matter of fact , i do believe that i should n’t be penalized for the inefficient bathroom usage of women , so kinda ? but that was n’t my point , i just wanted to highlight that your argument is worse than useless , it is misrepresenting the truth to fit your own OOV and the only thing worse then misrepresenting facts is to it so badly that the people you want to convince can see through it OOV congrats , not only are they still not convinced , they are now also pissed that you lied to them and insulted because you thought they would fall for such a cheap trick ...

#### 1057\_ah\_t1\_d5mqiy1.json (ah–delta)

(OOV\_comment\_begin) You just said that steroids should be allowed because they would always be done in a safe , monitored environment. I ’m telling you that would clearly not be the case . And for the second bit you missed my point. If a current player wanted to be clean he could n’t because he would be competing against those who OOV He would n’t have a choice any more. Sure , if could stay clean and get beat out by people who are juicing , but odds are that to compete against those who juice , he would have to juice as well .

(OOV\_comment\_begin) OOV OOV No , I did n’t say that at all. I explicitly addressed that strawman in the beginning of [ this same comment chain ] ( https : OOV ? OOV ) . We ca n’t have a discussion if you ’re going to be disingenuous and twist words to suit your case .

(OOV\_comment\_begin) You said that lifting prohibition would lead to safer steroid use. That ’s not a straw man. That ’s your words. Is that 16 year old , who will have to compete and who wants to get scouted going to be using steroids at all in a safe manner , or will be be damaging his health. Are you cool with 16 year olds using whatever PED ’s they can get their hands on .

### 899\_ah\_t1\_czk0ma2.json (ah-delta)

(OOV\_comment\_begin) Define truth as you are using it in this OOV If your premise is that truth is binary – either something is true or it is n't – then your premise is flawed , and therefore your conclusion has no merit .

(OOV\_comment\_begin) Because OOV and OOV are mutually exclusive theories , the question of which is true , if either , is a OOV Contrast that with the question of the length of a football field. That answer is also a binary , strictly speaking , but it admits of OOV A theory that it is 50 yards is not mutually exclusive from a theory that states that it is 75 OOV In fact , we can say that , in a sense , the latter is more accurate .

(OOV\_comment\_begin) Then , based on this definition , P2 is true , and not “ equally ” true as P1 .

### 193\_ah\_t1\_d20a3by.json (ah-delta)

(OOV\_comment\_begin) Not necessarily , in some countries - being baptized automatically makes you part of that church and it could be argued that forms of religion is more of a culture one can exist in ( OOV for example ) . However , I do think that 's not really relevant for the core discussion , here. I would still argue that Christianity is something one can accidentally be - but I do n't think that 's something that 'll change someones view .

(OOV\_comment\_begin) OOV That 's nothing but orthodox OOV You and I both know that if someone genuinely does n't see themselves as part of the culture they were born in , they would not identify with it. OOV Agreed , you 're the one that brought it though. I just showed you that even if that was a good analogy , it would still work against you. It 's a bad analogy though because no one is born into feminism , so it 's even harder to pretend that someone who does n't see themselves as a feminist could possibly be a OOV

OOV Once again , religious institutional technicalities aside , genuine faith is a very personal thing that is not predetermined by OOV If someone fundamentally does not agree with or adhere to the religion or culture they were born in , it would be wholly inaccurate to still consider them a part of it .

(OOV\_comment\_begin) OOV You can be part of a culture without identifying with it though. OOV Absolutely , but this whole religious discussion started with you connecting things to Christianity , but I digress .

### 979\_ah\_t1\_dj7yhve.json (ah-delta)

(OOV\_comment\_begin) So I think the most interesting case here is Paul OOV OOV was Trump 's campaign chair , [ but was not paid by the Trump campaign. ] ( http : OOV ) As noted in that article , someone in OOV 's position would typically pull down a six-figure salary , but OOV was working for free as reported to the OOV [ OOV had previously been paid large amounts of money by close associates of Putin ] ( https : OOV ) and [ from the OOV government of OOV ] ( https : OOV ) OOV also received [ very suspicious mortgages for millions of dollars with improper documentation ] ( http : OOV ) at the time he left the Trump campaign. Is this alone conclusive ? No , but it is deeply suspicious , and if it can be traced that OOV was in the pay of the Russian government while he was running the Trump campaign and not taking any pay from them , I 'd be willing to say that evidences collusion .

(OOV\_comment\_begin) Hillary Clinton received tens of millions in gifts & donations from Middle Eastern governments that have horrific human rights records towards gays , women , and minorities ... .. and have aided the spread of [ ISIS and extremism ] ( http : OOV ) . I do n't remember anyone suggesting she OOV with [ Saudi Arabia ] ( https : OOV ) , Oman , [ Qatar ] ( http : OOV ) , etc .

(OOV\_comment\_begin) How is Hillary Clinton receiving gifts on behalf of the US government and handing them over to the US government relevant to what Paul OOV did ?
