# Supplementary material
Source: ML conference proceedings conference paper supplement (https://aclanthology.org/N18-1036)
Supplement: Datasets [file N18-1036.Datasets.zip]

# 1 True positives (AH as AH) 103

## 422\_ah\_t1\_cpo1mr9.json (ah-ah)

(OOV\_comment\_begin) What ? You found a game where people do n't smack talk ?

(OOV\_comment\_begin) At the very least , a game where it is n't considered normal to be obscenely OOV I specify the game in my OOV Did you not read it ?

(OOV\_comment\_begin) I read your comment , but it 's completely OOV I can only parse out OOV Hence , my question .

## 1143\_ah\_t1\_dmxha6q.json (ah-ah)

(OOV\_comment\_begin) That is n't true. The conflicts in Iraq and Afghanistan are anything but successful for the OOV It is literally exactly the OOV They are dying by the OOV The US is n't accomplishing its goals very quickly , but that does n't suggest that the " rebels " there are OOV Furthermore , the goal of a rebellion literally OOV the defeat of your OOV A rebellion is an existential threat with only binary outcomes available. By definition .

(OOV\_comment\_begin) If you think of warfare through those means you 'll never understand it. War is millions of extremely complicated people , with extremely complicated motivations , in extremely complicated cultures , economies , terrains , technological advancements , attempting to beat the other team by self imposed rules that are themselves pretty complicated .

(OOV\_comment\_begin) OOV War is one of the simplest things about OOV It 's as simple as sex and food and just as primal and just as old .

## 552\_ah\_t1\_dmnjo82.json (ah-ah)

(OOV\_comment\_begin) Canada recently passed a law stating you must call someone whatever they tell you to call them. California wants to put people in a cage for a year if you do n't want to participate in their delusions .

(OOV\_comment\_begin) OOV OOV lay off the right wing OOV This is pure paranoia OOV How sympathetic of you

(OOV\_comment\_begin) 1. It 's right wing propaganda ? It 's a very real law OOV Not sure what your point is here. 2. It 's not OOV It 's abusive in most circumstances to reinforce OOV If I demanded that you call me the Queen of England you would n't be unsympathetic for not doing so .

## 1276\_ah\_t1\_dlh2adc.json (ah-ah)

(OOV\_comment\_begin) OOV Why do you think parties exist ?

(OOV\_comment\_begin) that does n't matter. we 'd have to work hard to make sure they no longer do .

(OOV\_comment\_begin) It does matter. OOV does not exist because parties exist. Parties exist because partisanship OOV Just look back at the reasons why the first parties were created : like-minded people wanted the best shot to implement their OOV In order to get rid of parties , you have to get everyone to agree on everything. Good luck with that .

## 170\_ah\_t1\_crcea3j.json (ah-ah)

(OOV\_comment\_begin) OOV I guess evidence is out of the question .

(OOV\_comment\_begin) I would be happy to provide evidence and OOV I will follow up with it in an edit after I 'm done making OOV Do you have any evidence ? I realize that the numbers speak for themselves , but it 's a class problem , not a race problem , and the fact that certain races inhabit certain classes is part of a larger problem of long enduring OOV your view actually being some solid anecdotal evidence for why this is occurring at all .

(OOV\_comment\_begin) Crime , SES status and race are all strongly correlated , I think we can agree on this. Likewise we can agree that correlation alone does not evidence OOV However crime SES status and gender are also OOV But no one makes the argument that males only cause crime because of OOV Why do the same for race ? Males dont have the excuse of slavery or Jim Crow to deflect the obvious ... there 's a significant genetic component to criminality .

#### 827\_ah\_t1\_dlhd6du.json (ah-ah)

(OOV\_comment\_begin) If that example makes you more warm and fuzzy , then sure , it works both ways. The point is that you can be amplifying OOV discrimination without knowing it. It 's a lot harder to be fair , and to make fair rules , than it OOV Which is why quotas are a lot better. If you believe no race is superior , and your local community has 12 % blacks , then there should be about 12 % blacks in executive OOV As well as 12 % blacks in junior OOV And about 50 % women. Etc .

(OOV\_comment\_begin) OOV are n't fair though. Why should you be penalized for other people of your race doing well ? That 's OOV If you penalizing someone based off of their race , that 's OOV You want to fight discrimination with more discrimination ? That makes you just as racist

(OOV\_comment\_begin) OOV How so ? If everyone is equal regardless of race , then your hiring practices should result in an equal number of people from every race and gender , based on local percentages of population. If your local population has 12 % blacks , you should be hiring 12 % OOV If you are n't , then your hiring practices have some hidden racist criteria , like the one I pointed out in my original example. If on the other hand you think races are n't equal , that is OOV definition of being a OOV Choose one .

#### 405\_ah\_t1\_dizg8c6.json (ah-ah)

(OOV\_comment\_begin) OOV I 'm ping you because I think it 's very important that you actually understand and acknowledge what I OOV It 's concerning to me that you think that being a self made billionaire is a " once in a generation " thing. It speaks to the sentiments that OOV has and I think it 's a very toxic thing that many folks engage in. A self-fulfilling prophecy if you will. If the media and yourself tell you that you ca n't succeed , then you OOV are you going to become a billionaire ? Probably not , but you can definitely make better for yourself if you put some effort at it .

(OOV\_comment\_begin) I hope capitalism burns to ashes before my eyes in my lifetime - or at least suffers and OOV and the seeds of it 's downfall are firmly OOV I do n't want to be a billionaire , and I am not impressed by the supposed " drive " of OOV Half of them should be in OOV Success is n't measured by wearing the boot instead of being under it. OOV This OOV me. I have no lack of drive to improve myself , but choose to better myself in ways that are not so easily quantified in a OOV life view and overall make me a much better person than someone who is driven primarily by monetary gain .

(OOV\_comment\_begin) OOV It 's funny that you hate capitalism so much that you 've willfully deluded yourself into believing factually incorrect things. ( " Once in a generation self made billionaire " ) I mean , I think capitalism is great. It needs regulation in some ( most ) areas , but it 's produced the greatest societies the world has ever seen and deviations from that have pretty OOV crashed and OOV Non capitalist societies work okay in small agrarian communities , but that 's generally a much harder life than what most of us in capitalist America have grown accustomed to .

#### 77\_ah\_t1\_dbt1dhw.json (ah-ah)

(OOV\_comment\_begin) OOV , so the forcing of women to have sex is not supposed to be shameful ? You want rape to be legal , and feel it is natural ? If that is the case , we are pretty much done OOV But one more empathy exercise , just for shits and OOV How do you feel about someone raping your mother , your daughter ? Is that perfectly okay ?

(OOV\_comment\_begin) this is why people are anti feminist , because the very idea of rape is related to men specifically , to the point where you crazy OOV say shit like this if rape is brought up. it doesnt even occur to you that being singled out as a gender thats predisposed to it could be damaging , and that we should teach the same thing to apply to both genders , you just immediately jump on the rape culture train and start shaming men. this right here , is why you arent taken seriously .

(OOV\_comment\_begin) OH dear OOV Of COURSE men get raped , and it 's horrible ! But the vast OOV majority of rape victims are women. If you lined up 1000 people and asked a question about rape , most people would assume you are talking about women. Is that a bias , yes ! But like most things , it is n't ill intentioned or saying that male rape victims should be OOV And please stop using the word OOV It says more about you than it does about me .

#### 571\_ah\_t1\_dfrciys.json (ah-ah)

(OOV\_comment\_begin) Yes or no ? The “ responsibility to provide and protect ” is not as difficult now as it was in the past. In fact , now , it 's about 8 hours of dealing with your boss then going home. Raising children is a job that you never get a break from. And alongside that having to maintain a home and cook every meal and maintain a relationship with a OOV Maybe you should look into your own argument before finding flaws in mine ?

(OOV\_comment\_begin) How does this detract from literally anything I 've said ? ( respond to this before anything ) . And besides do you think because it is easier to do something now the issues at hand ought to be ignored as privileged whining ? Also , 8 hours of dealing with your boss is n't easy as you think and there 's always work pressure and office politics you have to deal with . If you think raising children is not your cup of tea why did you choose to do it anyway , instead works for 8 hours and deal with an asshole boss and have yourself enough money for daycare OOV and whatever you can OOV OOV Why is this statement necessary ? It is condescending and adds nothing to the OOV Literally what is the point of that snark , this subs purpose is to change people 's view not close their minds with condescending OOV Maybe YOU should look into your own argument before finding flaws in mine .

(OOV\_comment\_begin) YOUR ENTIRE ADDITION TO THIS DISCUSSION HAS BEEN NOTHING BUT OOV This sub is for peaceful discussion between open minds and all you 've done is solidify the stereotype that OOV are know it OOV that have to be right. If you really care about OOV 's rights ' then maybe you should work towards common ground instead of finding people to be victims of. You obviously did n't come here to change OOV mind. You came here so that you could reassure yourself how right you are by telling others they are wrong. If you would like to have a real discussion about what the issue at hand really is and you can use your big boy words without accusing womanhood of ruining the world , then maybe I 'll consider continuing the conversation .

#### 1081\_ah\_t1\_dgu3zjy.json (ah-ah)

(OOV\_comment\_begin) There 's also no hard data to show socialism has ever OOV That does n't stop the left from pushing for it. Why do you need “ hard data ” to support a tax cutting idea ... but do n't need it to support a socialist increase in taxation ?

(OOV\_comment\_begin) OOV Define “ work. ” It seems to have worked pretty well in those socialist OOV of northern Europe. Germany is , compared to the US , OOV OOV ( And highly unionized OOV ) Yet only once since 1980 have they had a trade OOV OOV is working .

(OOV\_comment\_begin) oh yes ... it worked great in germany ? ! http : OOV and the revised version is working great now too ? ! http : OOV http : OOV So while more are working ... more are OOV The very reason socialism does n't work ... instead of bringing the poor up out of poverty , it makes everyone equally poor .

#### 310\_ah\_t1\_dlr8ydh.json (ah-ah)

(OOV\_comment\_begin) OOV Then it 's OOV You have your answer. OOV on .

(OOV\_comment\_begin) Then you 're saying I 've insulted myself .

(OOV\_comment\_begin) Oh , you 're not actually reading my OOV OOV Have a nice day .

#### 86\_ah\_t1\_d4m70l7.json (ah-ah)

(OOV\_comment\_begin) OOV Youth grows up and learns life OOV The arrogance of youth is to assume they know more than those who have a literal lifetime of experience more .

(OOV\_comment\_begin) The old get older and stuck in their ways. The arrogance of the old is to assume they know best just because they have a “ lifetime of experience , ” a majority of which may be completely irrelevant to the current issues. Besides , young people also get to learn from the experience of older people. It ’ s foolish to assume being older equates to being wiser .

(OOV\_comment\_begin) OOV Its **idiotic** to assume young people know what they are talking about over those who are older just because they are not “ set in their ways ” . I ’ m currently in **that** middle ground at OOV I ’ d love to be 25 again physically , **but** not OOV I was an idiot , who **thought** I had answers **but** **really** **did** n’t have a **OOV** **I** **do** n’t **think** I ’ m exactly unique in **this** .

#### 240\_ah\_t1\_cjm6xgm.json (ah-ah)

(OOV\_comment\_begin) No , I mean **outlawing** the practice of **circumcision** on **OOV** individuals and helping those who have been damaged by the **surgery** .

(OOV\_comment\_begin) **Your** title says otherwise .

(OOV\_comment\_begin) **You** are just **reading** it **wrong** .

#### 144\_ah\_t1\_dav3f1b.json (ah-ah)

(OOV\_comment\_begin) You did n’t actually make a point. Or at least , you did n’t make an OOV You just made a declarative statement without any reasoning , **argumentation** or **evidence** to back it up. And what can be **asserted** without **evidence** can be **dismissed** without **evidence**. So either present some or move on .

(OOV\_comment\_begin) The **burden** of education is on you , not me .

(OOV\_comment\_begin) I ’ ve already made my **OOV** **You** have n’t presented any **evidence** or **argument** that **disagrees** with anything I ’ ve **said**. **You** can disagree with me as much as you want. But **unless** you can educate me on **OOV** you disagree , then what do you expect me to say ?

#### 445\_ah\_t1\_dn66fpv.json (ah-ah)

(OOV\_comment\_begin) Being **married** to the person you are having kids with and having a job , a home and a car is “ **ridiculous** ” ?

(OOV\_comment\_begin) **Yes**. Women ca n’t always decide when they ’ re **impregnated** .

(OOV\_comment\_begin) They can decide if they stay **pregnant** .

#### 1260\_ah\_t1\_d0mfgwx.json (ah-ah)

(OOV\_comment\_begin) OOV Lol **citation** **needed**. Lets be fair , the **vast** majority of Trump supporters are working class white OOV OOV You do n’t **seriously** **think** this is impressive , do you ?

(OOV\_comment\_begin) No , but you and the media think Trump supporters are at max high school educated , you ’ re **delusional** if you do n’t **think** this is the portrayal in the media and public OOV Well ?

(OOV\_comment\_begin) The stats show that the vast majority of his supporters are in working class **OOV** **I** ’ m certain he has plenty of college educated **OOV** **I** **think** Trump ’ s **stance** **transcends** economic class , **like** most good OOV His entire strategy is to unite Americas white male working population .

#### 587\_ah\_t1\_cm7dix3.json (ah-ah)

(OOV\_comment\_begin) If only you would n’t rely on [ **fallacious** ] ( http : OOV ) [ **arguments** ] ( http : OOV ) to make your point. So no , I do n’t realize how stupid and naive I am. All **I** ’ ve realized is that you are n’t actually prepared to have an actual discussion .

(OOV\_comment\_begin) What god do you believe in ? And it 's not a fallacy when it 's very comparable to the most popular gods .

(OOV\_comment\_begin) You 're making an assumption on what I believe , then attacking your assumption of what my belief is without me even telling you anything. OOV It is a OOV It 's the comparison itself that is OOV If they were n't comparable at all , then it 'd be impossible to commit the OOV You can compare apples to oranges , but the moment you use your fingernails to peel an apple you look like an idiot .

#### 624\_ah\_t1\_dmz7t8d.json (ah-ah)

(OOV\_comment\_begin) OOV Yes , because how dare us look at what they do instead of listening to the lies they tell us. OOV /s

(OOV\_comment\_begin) Look up the “ violence against women act. ” I do n't remember if it was 2012 or 2013. All it did was give a man a longer sentence for hitting a woman than if a woman hit a man or a man hit a man. Kinda the opposite of equal rights. And yet democrats shamed republicans for voting against that bullshit bill

(OOV\_comment\_begin) So OOV I do n't care that someone else blamed them for something else. I made no declaration or proffered no opinion on that bill or it 's subject. I 'm merely stating that looking at the voting record is a much better way to determine what politicians want and are in support of than what they say ( and a better predictor of what they will support in the future ) . And this goes either way. Democrats can be equally condemned in this manner ( although , depending on your own political views more or less so ) . The point being made by OOV is that in many cases those bills are OOV better for society or the people. He did n't list every possible bit of legislation he agrees with or thinks makes one side look better or worse. He chose specific legislation that would be of OOV benefit. He also does n't speak to legislation that would be even better than those provided ... as I 'm sure there are better ideas than some of those bills OOV Lastly , one single bill is n't enough to explain away the litany of examples to the contrary .

#### 334\_ah\_t1\_d1vj0cf.json (ah-ah)

(OOV\_comment\_begin) I think OP is trying to say that Cultural Appropriation as a OOV is valid , but something that is often used in error ( and by people who have no claim to said culture ) as a means of appearing righteous and or / morally OOV It may be misused , but the concept is n't baseless or without OOV OOV It 's a bit misleading to look at the situation that way , no ? Plenty of people individually believe that they 're 'just one person ' , and that their actions are n't significant enough to impact anything. That sort of belief is why people vote out of fear in elections ( instead of voting for who the candidates they actually favour ) , or think it 's permissible to let their friends cut in line in OOV If only ONE person did the OOV ' , the statement is true : there would be minimal to no impact on election results or wait times. But it 's never just one person , because we do n't act or live in a OOV OOV This presupposes that the OOV owners ' are numerous and/or powerful and/or in a position to assert themselves in a way that holds up their OOV ' view as the correct view ( as they see it ) . OOV OOV We can all agree : let the borrower beware - you have no one but yourself to blame if that “ AWESOME OOV OOV ” you got actually says “ Duck OOV ” . But the swastika is an interesting case : it was something appropriated from Hindu culture by the Nazi Party , and is now commonly associated first with Hitler and Nazism , as opposed to its actual [ roots in the Hindu Religion ] ( https : OOV ) . Most accusations of cultural appropriation are n't even remotely on the same level of legitimacy ( for example , an Irish person demonstrating how to make chicken OOV is not appropriation ) , and should be evaluated and disregarded once they 're found to be OOV But it 's unfair to dismiss the concept altogether .

(OOV\_comment\_begin) OOV No , it OOV I never asserted any OOV from their action. I never said that the original owners OOV be victorious in holding onto whatever meaning they had in their OOV I said that it is incumbent on them to OOV , if they care. If they fail , then so be it. The prevailing sentiment of the public and the culture does n't care and prefers the new OOV OOV I guess I take a OOV view of the situation. I do n't believe that any particular group in this case has any inherent property ownership of their ideas. If they lose the fight , then too bad. Hopefully



they had a record of what it originally meant on wikipedia at the least or some other source so anyone who wants to investigate the history of the symbol can find more information. However , if they are not important enough or the symbol to them is not important enough , then so be it. OOV Any concept is a OOV I 'm dismissing the relevance of cultural appropriation as something that “ is dangerous ” or “ is noteworthy ” or “ is something worth fighting against ” or “ taking action against ” . E.g. why the fuck are we talking about this. It 's quite literally a normal part of human interaction and OOV As you note , the swastika is an interesting example because it more or less happened. I do n't mind. The information is there and the OOV OOV had enough following and was important enough to basically The World and to the west in particular that it has asserted itself as the default or primary interpretation and idea. The key here is for people to not get their panties in a wad when they misinterpret the new meaning as the old or OOV That is the important point. Not the “ appropriation ” itself , but the coherent understanding of what the meaning is , was , and what it is not , or OOV Being tolerant of the meanings other people hold is important – being afraid to attribute your own meaning is \*not\* .

(OOV\_comment\_begin) OOV Would you argue that we should treat artists / inventors / creators in the same manner ? I.e. that they do not have ownership of their ideas at all ? OOV Who gets to decide if they are important enough , or if the symbol is important enough to them ? Again : if the the offended party happens to be a minority , they should just accept that bigger / more vocal / more powerful groups or individuals can just OOV whats important to that minority with impunity ? The claim of cultural appropriation OOV the OOV that [ insert thing under scrutiny ] is important. OOV I 'm not certain Darwinism is an appropriate lens to view social interaction through. It is an explanation for why ideas are overwritten or OOV , certainly , but I do n't think it should be held as something to aspire to. OOV society should aim to eliminate scenarios where brute strength and the tyranny of the masses decide what is and is n't correct or a problem. This are still discussions about this issue because people feel there is value in shielding groups or cultures from being forcibly redefined , even if it 's through indifference or refusal to recognize claims to an idea. OOV I think Hindus or Buddhists who have been accused of being OOV for simply utilizing something that has belonged to their cultures since the 2nd Century BC may mind a OOV The Nazi adoption of the OOV did n't OOV ' by being more popular - there are certainly more Hindus and Buddhists alive today than Nazis - it has been saddled with its negative association because people in the west OOV n't OOV to dig deeper for those facts .

### 603\_ah\_t1\_cw49q4i.json (ah-ah)

(OOV\_comment\_begin) I completely OOV I am as opposed to the idea that fans are “ entitled ” as you are , but a company like valve who has been created by the loyal support of its fans is showing them a huge disservice with a lack of transparency and support to the players who have made valve what they are today. To assume that fans would be in an uproar and demand more information if valve said anything is groundless .

(OOV\_comment\_begin) OOV This is rhetoric that comes from an entitled OOV So you bought their games and they got rich ? So what ? They owe you more than what they sold you ? OOV If you ask a question and do n't get the answer , is that not in of itself transparency ? Really just think about it OOV Valve OOV that if they made Half Life 3 people would pay for it. Furthermore they know that it would be positively idiot proof to announce it if they were making it. Them saying nothing , is informing you that they are not doing anything , and so they do n't need to announce what they 're not doing , because that much is apparent .

(OOV\_comment\_begin) OOV OOV overuse aside , this statement is nothing but pure OOV Another groundless OOV There no point in countering a point that stands on nothing. Do you not remember the first OOV after episode 2 was released ? Valve teased the community with [ this picture ] ( http : OOV ? OOV & OOV ) . And then ? OOV To claim that myself and millions of others are essentially spoiled entitled little brats is a tad absurd .

### 146\_ah\_t1\_cvfak11.json (ah-ah)

(OOV\_comment\_begin) Do you think the government ought to attempt to undo the harm done to Canadians by colonialism or not ?

(OOV\_comment\_begin) Quit spoon feeding them and supporting their destructive lifestyle .

(OOV\_comment\_begin) Oh , OOV White Canadians should certainly have their welfare cut off. I suggest defunding freeway construction , ending subsidies for white people mortgages and getting rid of small business and agricultural tax breaks and assistance. Builds dependency , do n't you know. The suburban lifestyle is just so destructive .

### 798\_ah\_t1\_d10arr0.json (ah-ah)

(OOV\_comment\_begin) This comment has been overwritten by an open source script to protect this user & OOV ; s OOV If you would also like to protect yourself , add the Chrome extension [ OOV ] ( https : OOV ) , or the Firefox extension [ OOV ] ( https : OOV ) and add [ this open source script ] ( https : OOV ) . Then simply click on your username on Reddit , go to the comments tab , scroll down as far as OOV ( hint : use [ RES ] ( http : OOV ) ) , and hit the new OOV button at the top .

(OOV\_comment\_begin) That 's because you clearly ca n't wrap your head around the idea that there are more ways to negatively affect employment than just the rate. Think very critically about that before you start posting the same tired politically driven , carefully worded article .

(OOV\_comment\_begin) This comment has been overwritten by an open source script to protect this user & OOV ; s OOV If you would also like to protect yourself , add the Chrome extension [ OOV ] ( https : OOV ) , or the Firefox extension [ OOV ] ( https : OOV ) and add [ this open source script ] ( https : OOV ) . Then simply click on your username on Reddit , go to the comments tab , scroll down as far as OOV ( hint : use [ RES ] ( http : OOV ) ) , and hit the new OOV button at the top .

### 383\_ah\_t1\_dfwn5ka.json (ah-ah)

(OOV\_comment\_begin) There are currently numerous methods of identifying incurable diseases in OOV However we still have many parents who choose to keep the child even though they know perfectly well it will never be a healthy member of society. I 'm talking about stuff like Down 's disease , OOV , missing limbs , muscular dystrophy , etc. I believe that people who choose to keep a sick fetus should be punished in the same way as we would punish someone inflicting a disease on a healthy child. Here 's my rationale : 1 ) The OOV ' state of being is OOV ' , let 's rank it at 0. 2 ) Healthy individuals are on a scale between 0 and 1 : some are better off , some are worse off , but most have a good life OOV 3 ) Extremely sick individuals are somewhere between 0 and -1 : the diseases cause immense pain and suffering to the kid and the poor soul will never have a normal life. By giving birth to someone in the third category you 're moving a human being from 0 to a negative state , rather than giving birth to a healthy child and moving a soul from 0 to a positive state. If instead of getting abortion and trying again for a healthy child ( or adopting ) you choose to keep the baby , you have made an action equivalent to inflicting disease upon a healthy child. CMV .

(OOV\_comment\_begin) lol everyone is born with an incurable expiration date .

(OOV\_comment\_begin) They say that an old person dying is just a very very late abortion .

### 1231\_ah\_t1\_dak8jte.json (ah-ah)

(OOV\_comment\_begin) Holy shit this is real : https : OOV Canadians are going to regret that. I am a libertarian ( everything should be legal unless it directly harms someone else ) . I do n't think you realize the instant you put restrictions on freedom of speech , freedom slips away. I am not a Nazi , but if people want to be in their own homes and have Nazi meetings , they should be free to do so. By this law , people could be jailed or pay fines for just saying a subtle racist OOV I mean think about this , if the creators of South Park , Dave OOV , The Simpsons , lived in Canada they would be in legal OOV You ca n't have a free country unless you have freedom of speech , this includes hate speech. Because you know what will happen when laws like this pass ? Person A does not like Person B ,

Person A accuses Person B of saying a joke about Black people , now Person B is at the courthouse paying a fine. This is regressive liberalism at its OOV You are right about threats and that 's it. You ca n't have your cake and eat it too. This law is OOV crazy , this would n't slide in the US and I am OOV I was born in the US and my heritage is OOV If someone said " all Persians are terrorists and smell really bad " , I would not agree with them but I would defend their right to say it ! That is the difference between you and me .

(OOV\_comment\_begin) No , we OOV This is the norm in the civilized world. You 're just on the wrong side of history on this one. South Park , The Simpsons , and Dave OOV are perfectly OOV Nazis are not , nor should they be .

(OOV\_comment\_begin) I am not a nazi , but people have a right to their crazy ideas. Its called freedom of speech. My boy James Madison wrote this. You should probably read it OOV " Congress shall make no law respecting an establishment of religion , or prohibiting the free exercise thereof ; or OOV the OOV of OOV , or of the press ; or the OOV of the people peaceably to OOV , and to petition the Government for a redress of OOV " If you want to peacefully hate , you have the right to do so .

#### 432\_ah\_t1\_d54qfh8.json (ah-ah)

(OOV\_comment\_begin) Labels are pretty important , because they have so many cultural variables attached to them. By your name it seems like you might like video games. I do to. You 've probably noticed as I have that gamers can get into absolute shit show arguments about how to define a gamer , or when something is a game or not , etc etc. This is true for just about any OOV Labels are important. If gender labels did n't carry any baggage it would be one thing , but they do. People literally jump to conclusions about people based on their OOV And not just a few conclusions , lots of them. Unlike gaming , we do n't get to choose to have those labels and the accompanying OOV We just get them. Some people do n't like the label they were born with so they want to change it. They want to have a choice. If we lived in a perfect world where people were n't categorized or judged based on their gender I do n't think this would be an issue. We do n't yet live in that world though .

(OOV\_comment\_begin) So you 're saying trans people take an issue no one gives a second thought about ( gender ) and makes it the sole purpose of their life .

(OOV\_comment\_begin) No I 'm specifically saying our entire culture makes a massive issue out of gender .

#### 1124\_ah\_t1\_dhbutoz.json (ah-ah)

(OOV\_comment\_begin) It does n't prove anything , but your line of thinking does support my belief that the true home of Fascism today is among people of the left. It 's very revealing how willing you are to discard the rights of a minority as long as it serves your political interests .

(OOV\_comment\_begin) OOV What about the rights of the majority ? Or do you no care about that so long as your candidate wins ? I 'm guessing that 's the case .

(OOV\_comment\_begin) This is OOV You are ( unwittingly ? ) repeating the talking points of the white supremacists almost OOV Majority Rights ! !

#### 760\_ah\_t1\_d3r5lw2.json (ah-ah)

(OOV\_comment\_begin) According to your criteria , saying " I 'm not attracted to OOV " is bigoted , but " I am a OOV man " would not be. Also , you say " we " " believe " this about OOV Who is we ? Why must everyone conform to these theories of sexuality or else have a moral failing ?

(OOV\_comment\_begin) Hoo boy here we go again. You can not know with certainty that someone is or is not trans without them telling you. You can not know that your OOV is being met or not. And , I mean , sure , you could personally claim that you just do n't conform to these theories of OOV I personally think that OOV one 's sexuality by gender is



rapidly becoming obsolete , for many of the reasons that I have outlined here. But seeing as you 're still going to label yourself , not to mention date within , that system , it 's a pretty futile thing to do .

(OOV\_comment\_begin) So I 'm OOV then. That does n't change your point , but it conforms to your system , if I 'm understanding you correctly ( and it is a better system , again , if I 'm understanding you correctly ) . It does n't matter if I ca n't tell the difference OOV A blind person ca n't either , but they 're not all OOV .

### 1273\_ah\_t1\_d97dq3p.json (ah-ah)

(OOV\_comment\_begin) Some cops are OOV A SWAT team is n't protecting people .

(OOV\_comment\_begin) So you believe some people have the right to offensively attack others who have not attacked anybody ( because if they had , then it would be defensive , not offensive ) ?

(OOV\_comment\_begin) Yes , people society as a whole OOV Not untrustworthy OOV .

### 1252\_ah\_t1\_d03dn3y.json (ah-ah)

(OOV\_comment\_begin) Male circumcision is a medical procedure with legitimate practical OOV To call it mutilation is an appeal to OOV I agree with your ultimate conclusion that circumcision should n't be chosen by parents for their child when the one possessing the genitals has no ability to OOV But to call it mutilation is incorrect , unless you 're willing to extend that term to all surgeries .

(OOV\_comment\_begin) OOV Nice try. OOV for a valid disorder is not the same as routine mutilation masquerading as medicine .

(OOV\_comment\_begin) Then maybe OP should have said that circumcision is sometimes mutilation .

### 1243\_ah\_t1\_dir5ib6.json (ah-ah)

(OOV\_comment\_begin) Just to be clear , I am aware that other ethnic groups make more money and have more privilege than white people – OOV are the richest I believe – I am using the term “ white privilege ” to refer to the privileges the racial majority of people have ( white people ) over a specific minority ( black people ) . Unlike most of the OOV internet crowd ( which , ironically enough , I typically OOV with and enjoy the material they put out ) , I believe white privilege exists , as a black man myself. Seeing the dislike rate on [ this Bill Maher video ] ( [https : //www.youtube.com/watch ? OOV & OOV](https://www.youtube.com/watch?OOV&OOV) ) , as well as the high rate of likes on pretty much any OOV OOV video ( i.e. [ this one ] ( [https : //www.youtube.com/watch ? OOV](https://www.youtube.com/watch?OOV) ) ) is what prompted me to make this. And I do n't think that the Bill Maher video was OOV by the OOV Train , because his other videos roasting Trump do n't have OOV as high a dislike OOV So this implies that even liberals are against the OOV There is institutional racism held against black people in the United States in 2017 , and the ripple effects of racism in the past ( namely the stonewalling of blacks decades ago from having any chance of getting into the middle class ) still exist today. If you are white , then you are inherently far more likely to be privileged than black people. ( Perhaps not relative to East Asian people , but to blacks , white privilege does exist ) . \* Black people are thrown in jail at much higher rates than whites and have far worse race OOV Police accountability , municipal violations , mandatory minimums , the state of our prisons , the war on drugs ( aka the war on vegetation that some people do n't like ) , a system where prosecutors can coerce you into OOV guilty to a crime you are innocent of , being unable to afford a lawyer and forced to take an overworked public defender – all of these are problems which disproportionately affect poor people , which are overwhelmingly black people. When you have a broken criminal justice system , you will inevitably have a broken family. Conservatives ( at least the ones on the web ) love bashing the black community for OOV ; and yes , the OOV \*is\* a problem for the reasons they cite , but the issue is that it 's conservative policies ( the war on drugs and unfair policing in particular ) that is partially fueling it ! \* A study found that employers are more likely to call back candidates with white sounding than black sounding OOV That 's just further employment OOV Plus , in these poor communities , black children who had no choice in growing up in the broke ass community they were born into are OOV into working these shitty jobs and entering these shitty OOV It 's well known that there is very limited class mobility in the US , and it is blacks who are suffering the most from it. \* A history of OOV Black oppression by the government did n't end at slavery ; it continued on an on for a long time thanks to discriminatory housing laws , OOV , schools not being OOV to accept the surge of black OOV children ( much less the illiterate adults ) . This history did not abruptly end 200 years ago ; the ripple

effects continue on today. Look at [ this comment ] ( [https : OOV](https://www.youtube.com/watch?v=OOV) ) on a post I made last year ( wow , I 've changed a lot on this topic , have n't I ) ? \* Most importantly , and I can not stress this enough : OOV There is nothing you can do that is more likely to create dysfunction in a culture than have shitty , underfunded schools that treat children as a burden to get rid of rather than a future part of the community. OOV , dangerous , underfunded schools with low-quality curriculum and bad police OOV In general , the OOV crowd \*is\* correct to point to violent crime and a broken family when explaining the cause of underprivileged black people ; but I believe that those are the OOV – not the OOV OOV – of the problem. Step 1 : the problems I mentioned in this post. Step 2 : blacks have more family anarchy and academic OOV Step 3 : black crime and dysfunction OOV I believe that the OOV crowd is only seeing the latter two steps of this process , and the right way to view this process is to look at all 3. This is not happening in a OOV Also , NONE of these problems ( other than problem 3 mostly ) do not affect white people. White people are absolutely affected by them to and they should fix the problems in those communities as well. This issue is about who these problems predominately affect ; and it 's OOV Now if you are white , then your privilege and black OOV is absolutely not your fault ; and I would n't say the onus is on OOV to fix our problems , but it is a political cause I sympathize with and you should to. Given how much people criticize the concept of white privilege , perhaps there is something I am missing here ( which is why I am interested in seeing this view changed provided it can be changed ) . ----- OOV

(OOV\_comment\_begin) You have defined privilege as an advantage that the majority has over the OOV So blacks in South Africa have black privilege , but are still worse off in every way than the white minority there. Hmm I am a right winger living in a blue state. So here people would have Democrat OOV Because of this , am I being oppressed ? And if so , what should be done about it ? Rich people are the extreme minority , but they have to deal with laws passed by the majority middle-class and OOV So we would have middle-class privilege while the rich are the OOV What should be done about this ? In summary : I agree with you. If thats what privilege is , than I agree it OOV The answer ? OOV society on racial lines. That way everyone has OOV OOV society on political lines. That way everyone has OOV I dont want to oppress you so Im going to make you OOV of where I live so you can be among your own and be OOV Build the wall and segregate all OOV to respective states to end white OOV You wont OOV this but you damn sure know this logic is bulletproof .

(OOV\_comment\_begin) I 'm not familiar with South Africa 's situation ; what are you trying to explain there ? When did I imply they have “ black OOV ” , plus are n't whites richer ( based on Google ) ? Can you explain what you 're trying to illustrate with this analogy more ? OOV Politics is something that can be changed ; it 's who you vote for. It 's nothing nearly like race , which you ca n't change. Is the “ oppression ” you politically face you dealing with unaccountable , OOV , asset seizing cops and living in shitty schools ? What are you trying to say – I do n't understand what you 're alluding to with this OOV OOV Are you implying that black people are rich ? Again , I have no idea how this is anything other than a false OOV I 'm not calling for racial segregation ; I am calling for the state of all this dysfunction – which affects all races ( blacks especially ) – to end so we can have racial OOV I will not OOV this comment ; not because the logic is immune to being shot full of holes ... but because it is already inherently full of holes .

## 629\_ah\_t1\_d5yi2y1.json (ah-ah)

(OOV\_comment\_begin) First , I assumed you meant in first world countries alone , because that is where I have usually seen the statistic waved about. I also assumed college age because that is the only study that has the 1 in 5 OOV I have no idea what the statistics are for irrelevant OOV like OOV I would bet that the rate is higher there. But still not 1 in 3. However , the sources you cite do not define sexual assault , thus they very well could have the same issue as the sources I cited ; that sexual assault included acts that were n't sexual assault , like having sex while OOV Also , reported assault is the only OOV Trying to guess how many people do n't report it is idiotic , because there is no way to know unless it is OOV It 's like trying to guess how many marbles are in a jar when you ca n't even see the jar .

(OOV\_comment\_begin) Sexually assaulting a drunk person is sexual OOV Just like robbing a drunk person is OOV I have no idea what you are talking about. And here , violent sexual assault from the CDC in the OOV [ One in 5. ] ( [http : OOV](http://www.cdc.gov/od/oc/media/pressroom/statement/2014/01/140114a.htm) ) . And anyone with a pulse knows that rape is the [ most OOV crime ] ( [http : OOV](http://www.fbi.gov/newsroom/speeches/2014/01/140114a.htm) ) . Linked to plenty of studies that explain the scientific methods used in collecting the data .

(OOV\_comment\_begin) I did not say rape of a drunk person , I said sex while OOV What is the CDC 's definition of rape ?

(OOV\_comment\_begin) OOV Oddly enough , this is not true. Being a shaman is not the same as being schizophrenic - the OOV OOV of OOV come from extreme physical situations or the use of hallucinogenic OOV ( Read \*The Teachings of Don OOV for a great OOV look at what being a shaman actually looks like. ) Schizophrenia is not at all the same thing as the experience of a OOV OOV Yes. And no - serial killer was an additional example of mental illness without OOV Most serial killers are not delusional - they know that they are killing people - they simply enjoy doing so and while they know it is “ wrong ” they do n’t care about social judgment ( except in so far as it might lead to not OOV able to do what they want ) . OOV Your previous stance was that if the person with the mental illness was not unhappy , they were not mentally ill. That has nothing to do with the impact on others. Is the schizophrenic who happily kills because God told him to mentally ill ? Is the sufferer of Jerusalem Syndrome who abandons her family because she is Mary Mother of God mentally ill ? If you start to focus on how their thoughts impact others , you ’ve already changed the OOV If you focus on how it impacts others , you ’ve conceded that happiness alone is not the measure of mental health. ( Which , to come back to the main point , would show that lack of a particular mental health issue in a particular OOV tribe is not evidence that they are , over all , happier and more content. It would also show that your contention that clinical depression is a fair measure of over all mental health is equally OOV ) OOV Only your contention was that if you were not unhappy you were not mentally ill , which is a lot more like saying if I ’m not in pain I am not physically ill. So the parallel would be more like a malignant tumor causing no pain ( yet ) . OOV Right , because mental health ca n’t be collapsed to a single metric ( and OOV not to a single binary metric ) . OOV is as bad a metric for mental health as OOV is .

(OOV\_comment\_begin) OOV OOV Its pretty common knowledge. OOV How does the effect that the person has on society reflect on whether or not they are mentally ill ? At what point does your disruption of society make you mentally ill ? And for your example where your state of mind makes you do something which then causes you to go to jail or something , then clearly your state of mind doesnt make you happy ... OOV But im not focusing on that ... you are ... I dont agree that how your behavior impacts others is a metric that can define whether you are mentally ill or not. Youre erasing the line between criminal and mentally ill. We dont treat a lucid , intelligent serial killer as mentally ill. What about the soldiers who kill civilians through carelessness ? What about the guy who dropped the bomb on Hiroshima ? OOV How do you figure ? Are you assuming that when I say happiness and unhappiness im referring to one fleeting moment rather than one feels overall ?

(OOV\_comment\_begin) OOV First , West Africa is not the same as South America. Second , “ common knowledge ” often turns out to be assumption and prejudice in OOV Third , I ca n’t seem to find a single source to support this claim that does n’t come from Some , who seems to have a vested interest in this claim as it promotes his business as a workshop OOV Fourth , see OOV : An Encyclopedia of World Beliefs , Practices , and Culture , Volume 1\* “ OOV and OOV ” , “ [ ... ] there are distinct differences between OOV and schizophrenic states of consciousness , not only in terms of the intentional and voluntary nature of these states , but also in terms of the affective , perceptual , and cognitive OOV ’s associated with OOV ” ( The same source will , to go back to your “ common knowledge ” inform you that this is a belief that has long been discredited by actual study in the field. ) OOV It OOV And OOV OOV Why not ? Plenty of people are happy in OOV Plus , who cares ? If they were happy before they went to prison , they were ( according to you ) not mentally ill. What does it matter if they later became unhappy ? OOV That ’s not what you said in your previous OOV “ If you take away the negative affects that these people have on others people , you could definitely call them delusional but I dont see how its an OOV Like if I have a benign tumor im not physically ill , so how is benign delusion an illness ? ” OOV No I ’m not. The serial killer is criminal and mentally ill. The woman who thinks she is Mary Mother of God is mentally ill but not OOV I ’ve given you examples of people who are happy and mentally ill and criminal and people who are happy and mentally ill and not OOV Since clearly

I think both the criminal and the OOV can be mentally ill , I am not erasing the line OOV Sure we do. We do n't treat him as criminal insane or as incompetent to stand trial or as not guilty by reason of mental disease or defect ( or whatever your state 's terminology is ) , but we still treat him as mentally ill. OOV enough to stand trial and sane are two very different things. OOV What about them ? They could be mentally ill and they could be not mentally ill. I 've no idea about their mental state. OOV Because pain is a better analogy to OOV Pain is symptom of the physical system , as unhappiness is a symptom of the psychological system. Pain can stem from multiple stimuli , like OOV Etc. The analogy is much OOV OOV I assume you are referring to a discreet moment in time , though not necessarily a fleeting moment. I assume that you would n't say 10 years of a happy childhood , followed by 5 years of an unhappiness amounted to a happy person at the end of that 5th year .

#### 1277\_ah\_t1\_dbt581e.json (ah-ah)

(OOV\_comment\_begin) OOV Then , assuming you 're correct about their intentions , respectfully , people should say what they mean and not things that are demonstrably OOV As improbable as it may be , it 's still entirely possible for a DEA agent , either off-duty or just OOV , to be in their restaurant , and for them to initiate a search on someone because they smell like OOV Them doing this would disrupt the business , and if OOV Fridays ' was legit concerned about this , no matter how illogical it would be to be concerned about it , they would have either the option of banning law enforcement ( which is not great PR ) or banning people who OOV like OOV Who do you think they 're going to ban in that instance , given that they think it 's a problem worth addressing ?

(OOV\_comment\_begin) Uh , I 'm not the person you replied to before. He had it right though , while DEA may be technically cops like you say , there is still a difference between those federal agents and the OOV OOV You 're splitting hairs and saying ridiculous things. FEDERAL AGENTS initiating a search over someone who probably just bought some dank at the dispensary down the road in WASHINGTON ? ? What the fuck are you smoking ? You seriously need to do some research on the DEA and how they operate .

(OOV\_comment\_begin) I 'm not saying that it 's a OOV OOV , again. But I 'm also not the manager of a OOV OOV I 'm speculating on the thought process of the person who put up the OOV This is fucking OOV , where “ devil 's advocate ” is the order of the day. OOV me because you disagree with what I 've said is bad form and not really likely to get anyone to change their mind , your hostility is against the rules , and you should rethink how you approach debate .

#### 1003\_ah\_t1\_csfaej3.json (ah-ah)

(OOV\_comment\_begin) You should get more mad about it tho

(OOV\_comment\_begin) Actually , you OOV It 's your health on the line. “ If you 're not outraged , then you 're not paying attention . ”

(OOV\_comment\_begin) “ If you 're not outraged , you 're not paying attention to our OOV propaganda that says the opposite of literally thousands of published research articles ”

#### 1116\_ah\_t1\_d2jlx2g.json (ah-ah)

(OOV\_comment\_begin) OOV So , in your view , the only way that a woman could OOV become unwillingly pregnant twice is by “ running around with her legs open. ” What about ; \* rape \* religiously restricted access to birth control \* parental restricted access to birth control \* financially restricted access to birth control \* manipulation or withholding of birth control by an abusive partner \* birth control failure How do you account for those many , many instances with your “ punish the promiscuous women ” policy ?

(OOV\_comment\_begin) Rape and birth control failure are legitimate reasons but the others do not prevent someone from getting birth control .

(OOV\_comment\_begin) Wait really ? Oh wow you 've totally changed my understanding of sociology and human decision making with that thoughtful , insightful OOV What a great contribution to this thread you 've made !

### 835\_ah\_t1\_de1nmso.json (ah-ah)

(OOV\_comment\_begin) The Oxford English dictionary defines gender as : OOV of the two sexes ( male and female ) , especially when considered with reference to social and cultural differences rather than biological ones. The term is also used more broadly to denote a range of identities that do not correspond to established ideas of male and OOV Note the use of the words OOV and cultural differences rather than biological ones ' .

(OOV\_comment\_begin) OOV

(OOV\_comment\_begin) Nearly there , it then goes onto the definition , keep reading ! I even repeated the important bit for you. : )

### 513\_ah\_t1\_cm1lv5u.json (ah-ah)

(OOV\_comment\_begin) Instead , OOV and beatings go way up. Just because violent criminals do n't have guns does n't mean that they ca n't hurt people .

(OOV\_comment\_begin) It does mean they ca n't OOV as OOV people. The chance of death individually – and to a much greater extent the capacity to attack multiple people at once – between the two types of attack is so vastly different that comparing the two is edging on the absurd .

(OOV\_comment\_begin) Knives do n't have to be reloaded , they can kill and kill and kill .

### 1275\_ah\_t1\_dl3nlyu.json (ah-ah)

(OOV\_comment\_begin) OOV You can still have pride in your heritage while looking back at the past and seeing it was wrong OOV So there arent any neo OOV out there ? OOV They didnt resist unless they were being harmed through the government 's actions And you arent able to adress this point at all OOV Why ?

(OOV\_comment\_begin) OOV I mean , if you 're honest , “ being harmed ” did include outrageous things like no longer being able to own human beings , and said human beings using their right as citizens to vote. Many of this grievances were just bullshit , and the government OOV have pushed them a lot harder on this .

(OOV\_comment\_begin) The government should have tried to phase out slavery by giving slaves more rights over time ( similar to what we have done to pets ) and OOV OOV labor , and not just suddenly banning it. That would have had significantly less disastrous results for the southern economy If they pushed them any harder , the US would never have recovered and would never had become a world power , let alone a super power

### 529\_ah\_t1\_clmcmmm.json (ah-ah)

(OOV\_comment\_begin) OOV Yes you OOV You were going on about the “ vanguard ” and the “ worker 's revolution ” and other Marxist OOV You called religion the “ opiate of the OOV ” You are a Marxist using Marxist OOV OOV How would I know what ? OOV It 's from “ ruling father. ” What 's your point ? OOV All men can be OOV That 's the beauty of it. OOV Yet another claim made with no evidence to support it. You seem to do that a lot. OOV You have proof of this ? OOV First you say forgiveness exists in order to excuse OOV Now you say Hell exists to excuse OOV You ca n't keep your story OOV OOV Once again , take your own OOV OOV I do that. That 's why I reject OOV It 's taken 100 million lives too many as is. Why give it another go ? OOV That 's exactly why I reject Marx .

(OOV\_comment\_begin) OOV I never have. But I do know it has nothing to do with communism ( it is only a critique of capitalism ) . You ca n't read it the way you read the OOV OOV All abuse is OOV OOV You are giving people OOV to OOV Why do you think your patriarchal leaders rape little boys ? OOV OOV Read it. OOV The basis of your entire life and you want to criticize OOV for it ? Does the cognitive dissonance ever get to you ? OOV Do you ever



listen to yourself ? I 'm trying to balance OOV delusions with our reality. I 'm trying to stoop to your level so you will someday see. People are getting what religion is , in OOV You may be too old , but you are losing the next generation with your OOV OOV I actually spend my time mitigating the suffering you OOV OOV No , that 's why your church OOV you to reject anything that does n't keep them in power , and you OOV OOV No , you reject OOV because your dogma tells you so. Your patriarchal leaders need you focused on OOV needs. Slavery is sick and being a willing slave in the face of reality needs psychiatric help .

(OOV\_comment\_begin) OOV It 's called the Communist OOV You ca n't say " it has nothing to do with OOV " OOV OOV It 's wrong , but wrong can be OOV OOV Most don't. OOV I have. OOV You are making claims without providing any evidence for them. OOV OOV Do you ? OOV Marxism has nothing to do with reality. OOV That 's why so many are becoming OOV OOV Most people would call me OOV OOV Marxists never alleviate OOV OOV Pastors do n't preach many sermons on the evil of Marxism these days. OOV I reject Marx because his ideas were evil. OOV You say righteousness is sick ?

### 1012\_ah\_t1\_cw6qhhv.json (ah-ah)

(OOV\_comment\_begin) It 's already a law , and I 've never heard of a single other person who did n't know this .

(OOV\_comment\_begin) What about the people who do n't use their turn signal ?

(OOV\_comment\_begin) What 's the question ? Many of us do n't when they are n't necessary. We 're well aware it is a law though .

### 388\_ah\_t1\_cpdxmjj.json (ah-ah)

(OOV\_comment\_begin) Who said I was ignoring it ? Why should the current system be changed ? As I said , a disqualified person can still obtain guns by illegal means or create them. How do we stop them ? They do n't even need OOV What about the bombings in Oklahoma and Boston ? The ATF OOV the compound in Waco killing many including children. OOV in Japan have used poisonous gas in attempt to kill many on a subway OOV You have suicide OOV People have been killing each other for thousands of years before the existence of OOV How do we stop those people ? How do we stop someone from picking up a knife and stabbing somebody ? You want a guarantee everyone will be safe , but refer to what I said before ... people cause crime. People are everywhere , therefor crime can happen everywhere. Violent crime is included within crime which means violent crime can happen where ? Everywhere and with anything. Statistics for what the method of killing is can be found on the FBI and CDC OOV Both non politically biased OOV You will find guns are not as big of an issue as OOV and stabbing OOV Where is the black market getting these guns ? OOV , theft , illegal manufacture , and the hands of our own government recently ... take a look into Operation Fast and OOV The ATF made attempts to sting the cartels by allowing them to illegally purchase weapons and it OOV One of the weapons sold to the cartels by the ATF was linked to the murder of a U.S. OOV patrol OOV Even if we were to somehow ban all guns and collect them from US citizens , you would still have the black market gun trade because of previously stated reasons. You can make them , steal them ( from OOV ... they have had weapons OOV many times before ) , or import them. Now criminals have the upper hand against the law abiding OOV Why are you so dedicated to attacking legal gun owners yet have no stated opinion on how to stop the violent criminals ? I have already stated a method of harsh punishment to help deter crime and repeat OOV And know that no system is perfect. You state that areas with less guns have less violent crime. Please provide statistics and sources for that information. It 's silly to debate statistics without actual numbers being presented .

(OOV\_comment\_begin) It 's stunning to me that you ask why the current system be OOV It eludes me how 30,000 dead Americans a year means so OOV Using a gun does n't require years of planning or military service like Oklahoma or OOV A simple look at the statistics shows that. Guns are easy , and easy to get , and people use them. It 's about raising the barrier of admission to violence. At least if someone is going to try to stab you , they ca n't do it from 125 yards away like in Ferguson a couple of days ago. How useful were those cops ' guns then ? If you troubled yourself to actually

read anything from the CDC , you 'd have noted that 74 % of homicides are committed with a gun in this country. Where the fuck is your idea to stop criminals ? You 're the idiot helping to keep them OOV You realize that people are n't smuggling guns OOV the US across the borders , they 're smuggling them OOV OOV method does n't OOV If it did , we would have the lowest crime rate in the world , but somehow we don't. Again , how has every other OOV country that does n't lock up everyone and does n't have as many guns have a lower crime rate ? Violent crime is reported differently in other countries than the OOV Perhaps you should spend more time checking your woefully mistaken data first .

(OOV\_comment\_begin) See , the name calling and emotion based opinion is where you lost all credibility with me. Please feel free to get back to me when you wish to have an adult conversation with me. Take care .

#### 80\_ah\_t1\_de92cak.json (ah-ah)

(OOV\_comment\_begin) The problem is that there are n't really better words i could have used. " Liberal " ? " Progressive " ? Those seem too general to be a valid replacement in this situation .

(OOV\_comment\_begin) I think I can help. Two questions : - What is it about OP 's username that led you to describe him or her as an " OOV " ? - How do you think OP would describe him- or herself ?

(OOV\_comment\_begin) OOV Well , they are named " Seven kinds of gender " . There is the attitude in conservative circles that there are only two genders , so this name seems to be a direct opposition to this OOV The idea that there are more than two genders is OOV widespread among people that some might call " OOV " . OOV I honestly have no idea. How would you describe OP ?

#### 729\_ah\_t1\_cwleev4.json (ah-ah)

(OOV\_comment\_begin) OOV So should I switch my dog + cats to vegetable based food , despite the fact that they are carnivores ? Should I try feeding my snake tofu ? The desire to prevent suffering is admirable , but in this instance I believe it is OOV Life on earth has evolved in such a way that a large number of organisms survive by consuming other OOV I doubt you fault a lion for killing a OOV Or a swarm of OOV when it eats a OOV alive. Humans are OOV We evolved to subsist on a diet of plant AND animal matter. Denying this fact is n't moral , it 's objectively and OOV wrong .

(OOV\_comment\_begin) OOV [ No you probably just shouldnt have a dog or a cat if you 're OOV ] ( http : OOV ) OOV So you 're saying we need meat to survive or be healthy ? Because thats not true .

(OOV\_comment\_begin) OOV For those of us lucky enough to live in a modern , first world country with access to the proper vegetarian alternatives , you are correct. But my point was n't that we need meat to OOV My point is that ethics do n't come into play for us any more than it does for any other OOV OOV We are what we are .

#### 948\_ah\_t1\_dl87de8.json (ah-ah)

(OOV\_comment\_begin) Then I guess according to your logic Xerxes invaded Greece OOV because of a treaty OOV The Second World War was only about OOV OOV And OOV Khan invaded China to OOV the Chinese from their OOV The Civil War was fought because of OOV It was the only State right at issue. Claiming state 's Rights is obtuse and OOV It suggests there was a series of OOV There was OOV Furthermore I never said the South wanted to expand Slavery OOV They did want to expand it West and they did want to maintain control of their slaves into the OOV Lest you forget the OOV escaped slave OOV .

(OOV\_comment\_begin) Ok , I see where you 're confused now. All the examples you give are ones involving aggressors and first OOV It 's very easy to pinpoint their motivation because they OOV on it. But to assume anything about why the other side defended itself requires a massive leap in OOV Did the Poles go to war with the Nazis because they wanted to exterminate all the Germans ? Did China go to war with the OOV because it wanted to take over Mongolian territory ? Did Iraq go to war because they had weapons of mass destruction ? Need I go on ?

(OOV\_comment\_begin) Remind me. Who controlled Fort Sumter and who fired on it ? Who attempted to secede when no actual law against slavery had been signed or had likely been OOV Would have the western states been free or slave ? I think you need to remember who actually started that war .

#### 896\_ah\_t1\_cxucmou.json (ah-ah)

(OOV\_comment\_begin) Sure there is , the observation that implementation of gun reforms directly correlates with reductions in gun violence much more than is OOV The data shows that the implied idea that restricting guns further would result in OOV crime ( “ only criminals will have guns ! ” ) is patently false .

(OOV\_comment\_begin) OOV OOV is absolutely not the same as OOV away with private OOV You want to talk gun reform ? Let 's talk gun reform. I 'm game. But you do n't appear to want that. You want to talk OOV That 's why you 're wrong .

(OOV\_comment\_begin) I know that right now , given the current political climate , doing away with private ownership ( or at least severely restricting it on the level of say , japan ) is n't going to happen. However gun OOV can help reduce private ownership to the point where it 's a OOV While i would OOV a OOV I agree that it 's not a OOV I 'm rather fond of how [ japan ] ( http : OOV ) handles the situation and virtually eliminated shooting deaths .

#### 749\_ah\_t1\_czbjtf.json (ah-ah)

(OOV\_comment\_begin) You ca n't name a single philosopher who advocates this “ fact ” , can you ?

(OOV\_comment\_begin) I can , I will name at least three if you can understand what rationality is. Now let 's be quick so I can move on to my points. Edit : Oh btw , you can google this fact as well .

(OOV\_comment\_begin) OOV Great , go for it .

#### 1085\_ah\_t1\_d79yn6z.json (ah-ah)

(OOV\_comment\_begin) Again , if we 're talking about policy fundamentally about children , it 's insane to have the conversation without at least considering the impacts on kids and doing what we can to address them. It 's only a fallacy if it 's actually OOV I 'm not handing out a policy OOV here - I 'm just saying we talk about it. Other threads have led to me coming to some fine agreements with folks that do n't involve screwing over the guy in question , and do n't leave a kid in a OOV Do n't abandon a debate of ideas to OOV over fallacies , OOV if you 're going to use the textbook lines yourself ; )

(OOV\_comment\_begin) OOV This policy is n't “ fundamentally about children , ” though people like yourself might like to spin it that way. This policy is about responsibility and OOV We expect men who sire children to be financially responsible for those children and we hold them accountable for that responsibility. If a man did not father a child he should n't be held accountable for that child 's OOV It 's that simple. The only reason to try to bring additional considerations into the equation is to muddy the water and make things more complex than they need to be .

(OOV\_comment\_begin) The conversation is about child support , and who should pay it. If you think that 's spin , then you 're doing exactly what I chastised OP for - forgetting that we 're dealing with real people , real lives , and some of those lives are the lives the most OOV That 's not an “ additional consideration , ” it 's an escalation of a debate from some facile theoretical red pill talking point platform to one that actually considers all the implications of a position before making a definitive statement .

#### 233\_ah\_t1\_cvqjoff.json (ah-ah)

(OOV\_comment\_begin) You can do anything OOV .

(OOV\_comment\_begin) So now delete your post .

(OOV\_comment\_begin) No , my original post is correct .

### 915\_ah\_t1\_cj45glm.json (ah-ah)

(OOV\_comment\_begin) The very claim that “ Israel has every right to retaliate ” OOV OOV that first you prove that Israel has a right to exist as an OOV Which is of course impossible , since Israel HAS NO right to exist. And no , “ BUT OOV OOV OOV ” do n’t count as an argument .

(OOV\_comment\_begin) Tell me then , under what premise does ANY country have a right to exist ? I guess the US does n’t have a right to exist. Or Canada. Definitely not OOV Or how about any European country who supplanted its OOV The list can go on and on. And by your logic , if the people surrounding Israel do not recognize its very right to exist , then no compromise is possible , with Israel ’s only recourse being total and absolute war to completely destroy the OOV War and violence is literally the only option if that ’s your starting point. Israel is here whether you like it or not , but one way to automatically rule negotiated peace out of the equation is to hold that line .

(OOV\_comment\_begin) Israel COULD dissolve itself and allow itself to be supplanted by a state that does n’t deny an entire ethnic group their rights. And , no , countries DO N’T have the right to exist. All government is OOV OOV OOV But for the sake of argument , your points are pitifully OOV Pretty much any country has a stronger claim to existence than Israel. If countries were dissertations , Israel ’s thesis would be one word : “ Yahweh ” .

### 486\_ah\_t1\_dii9yks.json (ah-ah)

(OOV\_comment\_begin) First of all , appeal to authority. Secondly , I OOV look at the methodology , and here is what I found : ( pasted from a comment I made to someone else ) OOV Exactly as I predicted there is undeniably going to be a huge amount of bias in any polls conducted this way. You call people , there are certain demographics that are more likely to answer the phone than others , also , if you just lost a presidential election , you are , on average , more likely to want to talk about it , and participate in those polls .

(OOV\_comment\_begin) OOV First of all. It ’s not. OOV Ironically these polls use land lines OOV So it in fact over represents the elderly , who vote OOV But again , this is controlled for. OOV OOV An unsubstantiated statement. Please cite how this is at all true. It ’s also very weird how this does n’t hold up for presidents like Obama : http : OOV

(OOV\_comment\_begin) OOV You say that it ’s a science and people are working to make it unbiased that it is therefore OOV As if these people automatically make it unbiased , it is either appeal to authority or flat out wrong. OOV How is it controlled for ? You get mad at me for making unsupported claims but here you are making an OOV OOV While I agree that using phone lines does on average yield a higher amount of elderly republican voters , I also believe that there are other effects that far outweigh this bias , such as : \* time of day \* the fact that people who lost are more willing to talk to polls than people who won \* the types of people willing to answer a phone from a random person in the first place \* etc. OOV That there is a liberal bias in the polls ? That doesnt hold up because ? But a few sources to illustrate my point : https : OOV http : OOV It should be noted that these are from the election , but are still opinion OOV If you think these are invalid just because they deal with the election , then you need to prove that the opinion polls held are somehow better than these , and why they would n’t just have used this “ super not biased method ” during the election as well .

### 71\_ah\_t1\_d67fio9.json (ah-ah)

(OOV\_comment\_begin) So let me get this OOV I put forward a factually correct statement ( first controlled , powered flight in 1903 ) , you say I ’m wrong but provide nothing to back you up. Ok , you ’ve definitely changed my mind /s

(OOV\_comment\_begin) Only you call your statement factually correct , and judging by the other stuff you have said you are to the Wright bros what a brazilian is to Santos Dumont , so there is no point in providing you with any information you do n’t have already. I never tried to change your mind , just inform you you have not changed anyone else ’s .

(OOV\_comment\_begin) I did n’t doubt Dumont OOV got the first unassisted takeoff , I used your logic to show that it ’s irrelevant by your standards. Your response is to say I ’m wrong and then refuse to OOV Thank you OOV , this has been enlightening .

### 701\_ah\_t1\_cxl3ita.json (ah-ah)

(OOV\_comment\_begin) He was asked to resign because he was a poor leader , I do n't see what you 're getting at

(OOV\_comment\_begin) Except that he OOV It 's just shrieking OOV decided he made a perceived slight towards them or something .

(OOV\_comment\_begin) How do you know ? Are you on the faculty that asked him to step down ?

### 6\_ah\_t1\_damekm5.json (ah-ah)

(OOV\_comment\_begin) Then are you giving trolls the victory then ? That they can do whatever they want ?

(OOV\_comment\_begin) Victory for trolls is attention , so really you 're the one giving them the victory by focusing so much attention on them. OOV There 's other countries you can live in if you want to have less freedom .

(OOV\_comment\_begin) Now in this case I 'll use bigot because troll tends to be too OOV Some also want to ruin people 's lives and make them OOV That also counts as a victory for them .

### 890\_ah\_t1\_cm5o0r3.json (ah-ah)

(OOV\_comment\_begin) 1. Not everyone takes out a loan to buy property 2. How would you go about detaining 11 million people ? I do n't think it 's possible to catch every illegal immigrant at any given time. 3. So you 're supposed to check every single person 's ID before they go onto a public road ? I do n't see how this is supposed to work. 4. Not every public park has park rangers who check everyone who enters the OOV There is a state park in my town that has various hiking trails that have various entrances and exits in different wooded areas of town. Are you suggesting that park rangers should patrol large wooded areas to ensure that everyone who goes hiking is a citizen ? My town also has a public OOV that does n't have park OOV Should my town have to employ people to check the citizenship status of every person who uses its public parks ?

(OOV\_comment\_begin) OOV You're saying because its happened maybe 0.01 % of the time ? OOV your key example ? ? ? ! ! ! OOV Just curious , how many Jews did you think the Third Reich detained ? OOV This happens all the time. Bus passes , toll roads , bridges , etc.. It ALWAYS happens , and you are saying its literally OOV OOV OOV Personally I dont even believe in borders or government. I disagree with any type of government OOV Im simply pointing out how incorrect your statement was and how bad of an argument you made .

(OOV\_comment\_begin) OOV 0.01 % of the time ? Do you have a source for that or are you just making numbers up ? [ " The number of homes bought with cash jumped to 32 % in January compared to 26 % a year earlier , according to the National Association of OOV In Southern California , about 30 % of the sales in January were cash , according to OOV Information OOV Same thing in OOV In Phoenix and Las Vegas , cash sales topped 50 % of all OOV " ] ( http : OOV ) OOV Oh so the U.S. is supposed to turn into Nazi Germany and round up anyone who looks like they may be illegal then ? OOV OOV What ? When do you have to show your ID when you pay a toll or for a bus pass ? Also , plenty of roads are n't toll OOV Are you expecting that everyone has their ID checked whenever they leave their house ? OOV So you do n't believe in borders or government , but you want to detain and deport anyone who has crossed a border illegally ?

### 210\_ah\_t1\_cyihrlz.json (ah-ah)

(OOV\_comment\_begin) Yeah , I 've been busy so I have n't had time to type this up. You pretty much summed it up in your second OOV OOV That is n't an " assault weapon " that is a " modern gun since the turn of the 20th century.

" " Assault rifle " is defined as " a select fire weapon chambered in an intermediate OOV " Thanks to federal law they are all but banned and the legal ones in civilian hands before the ban go for between \$ 5,000 and \$ OOV " Assault weapon " is a made up term for political reasons that is based either on ignorance and/or OOV It pretends that a few cosmetic features inherently more OOV An extendable stock , apparently this means that 12 out of every 9 babies shot with the scary black rifle will die OOV It has nothing to do with the fact that some peoples arms are longer than others and might need



different distances between the shoulder and receiver ( also know as “ length of pull ” if you care to know ) . This is like saying that any car with adjustable seats , pedals or steering wheel should be banned because it makes the car easier to race at speeds above the speed limit . Another common “ demon feature ” is a pistol magazine . Apparently the angle at which your hand meets the gun makes bullets cause more harm and the gun shoot faster , up to 3,600 rounds per minute ( well into mini gun territory ) according to CA senator Kevin de la Beazley . Yeah , you try to figure that one out. The list goes on and they add more and more features as they decide they want the ban to include more guns but at the end of the day it is all political grandstanding based on ignorance and fear. They are cosmetic and ergonomic features that are simply parts of new guns . Oh yeah , another “ evil feature ” is a bayonet . They are there for looks since bayonets have been less and less relevant every single day since the self contained cartridge was invented over 150 years ago. If you can find a single , violent crime committed by bayonet in the US in the past 50 years I will give you reddit . Seriously , I will. It has to be a legitimate robbery , assault or whatever , not just “ had a bayonet while committing a crime ” . Find a single person threatened with stabbing or actually stabbed and you get reddit . I’m reddit . The entire “ assault weapon ” thing is honestly like saying heated seats in a car should be banned because it makes it easier to do this : http : reddit . No , what your post refers to is the concept of both a semi auto weapon and reddit . These are two things completely separate from the “ assault weapon ” reddit . This is the basis of all modern reddit . The glaring problem here is that if you ban all modern firearms you are taking them away from law abiding citizens as well. First of all they are “ arms in common use ” so it ’s not going to happen and second of all , to say that they should be banned is saying that “ if your wife is facing more than one rapist then she should n’t be able to defend reddit ” . The whole point of guns is that they create a level playing field. There was a magical time before guns , it was called the reddit . Back in this wonderful , crime free period there was a simple rule , the bigger guy did what he reddit . Sure people banded together and formed towns , nations and posses , but at the end of the day the muscle behind the sword decided reddit . Thankfully today a 110 lb woman can be the complete equal to a reddit . man. Is n’t technology great ? Now you want to take that away ? Centuries of progress and technology have finally made all men ( and women ) equal and you want to ruin it all because you ’re scared of a lump of metal ? Why do n’t you try being scared of bad people and appreciative of the fact that you have the means to stand up to even the worst of them thanks to modern civilization and society. Oh , by the way , if you ban modern firearms and do succeed in getting rid of the majority of them you still have a problem in the fact that they are reddit . reddit . Pretty much anyone can make them with enough motivation and time , ask reddit . http : reddit . Finally we get to the part about magazines and reddit . Do you know how long a magazine change ? I ’ll give you a hint , if you are practiced with a weapon it is reddit . This goes for revolvers too. https : //www.youtube.com/watch ? reddit . The other glaring hole in the magazine capacity argument is the fact that it has been known for centuries how to get around running out of ammo ; you bring a second reddit . Anyone with any sort of tactical training or knowledge reddit , anyone who has played Call of duty knows that # 1 , you do n’t reload under fire , you reload when you get a break and # 2 , if you run out of ammo under fire , you switch reddit . All of the deadly mass shooters used multiple reddit . The Aurora asshole ( I refuse to use their names since recognition is what they want ) used a 100+ rd magazine on his rifle , and it reddit . He did n’t bother changing mags , he just used his other reddit . San Bernardino involved rifles and reddit . Sandy hook had a rifle , shotgun in the car and multiple reddit . Virginia tech had multiple pistols , he also fired 170 shots from 17 reddit . No magazine limit will stop someone from bringing a second gun or dozens of reddit . What a magazine limit does is hurt the person carrying for reddit . When I carry ( which is anytime I ’m in a free state and not drinking ) I carry a loaded pistol and one reddit . With a 10 round limit I quite possibly would n’t have time to take down two attackers without a reload under reddit . If there are 3 of them there is n’t enough ammo in both magazines to ensure my safety. I ’m not planning on shooting someone when I take my gun with me , I take it just in case. I ’m not going to carry 3 guns and 12 magazines and I ’m not planning on multiple engagements ; I ’m planning on a single engagement as needed to reddit . The person who woke up that day and decided to kill as many people as possible can bring as much as he wants , with me it ’s what I can fit in my jeans reddit . As a result , this legislation overwhelmingly affects law abiding citizens more than it affects criminals , especially those who just ignore it anyway. Oh , and one last thing , my rifles have never been reddit . That ’s not what

they 're for and not what the 2nd Amendment is about. Try taking a history OOV So here 's one last question , for you is it **ignorance** or **lies** ?

(OOV\_comment\_begin) OOV Bro , I do n't need your long **winded** **explanation** about " **assault** **weapons** " . I understand what the features are. Your **assumption** that I 'm concerned about **cosmetic** features rather than functional ones is **wrong**. OOV Nah , the whole point of guns is that they kill things they 're aimed at with a simple squeeze of the OOV OOV I 'm not **scared** of **bad** **people** because I 'm not a **little** OOV I **think** it 's ridiculous to work towards an " ideal " society where everyone possesses the power to kill each other in a **split** second with a minimal effort for whatever reason you want. OOV OOV It 's really easy to make drugs. Nobody expects a law to perfectly eliminate **something** that is OOV The **idea** is to make it difficult and levy penalties for violating the OOV OOV The point is to make it OOV Your example of a dude loading a revolver in one movement is OOV Not everyone can do that. He 's not a **mass** OOV OOV Sounds more **expensive** ... **good** ... OOV LOL OOV I guess you live in a movie where people are so determined to kill you , they take a whole magazine worth of fire and they keep on OOV Are you James Bond ? Why do these people want to kill you ? Why are you scared ? OOV How the **fuck** do I know ? I do n't know you. **ANYONE** with a gun is more dangerous to me than **ANYONE** without a OOV It 's **absurd** that you 're **terrified** of threats , yet I 'm supposed to see you walking around with a gun and feel at OOV **Fuck** no. I do n't know you from James OOV You probably look like James Holmes or Robert **Dear** or any of these other OOV OOV Oh , please. Please tell me what the second amendment is for ! I ca n't wait .

(OOV\_comment\_begin) Awesome , your **arguments** range from " OOV uh " to " OOV OOV " This is n't GRC , not everyone is in the same OOV and **facts** actually do matter. There 's a reason gun control is losing nationally and only people like you ca n't seem to grasp it. You 're just **plain** **wrong** and you refuse to **admit** it because you 're too scared of a piece of metal to admit that some people are bad and should be accountable for their actions .

### 1233\_ah\_t1\_de17sq0.json (ah-ah)

(OOV\_comment\_begin) Sorry for the **mess** of a **title** , I could n't come up with **anything** **better**. So I 'm **pretty** interested in several hobbies , including **modelling** and **painting** scale models and **playing** OOV Things like **Warhammer** and **WWII** OOV I saw a **discussion** on a **forum** **earlier** today where a guy was **slammed** for **painting** OOV and **iron** crosses on his Wehrmacht and SS army for a **WWII** OOV In my eyes **this** is ok , since you often want historical OOV Some people said people might be offended , others said it was OOV Change my view , **nazi** imagery is **okay** within OOV and similar OOV ----- OOV

(OOV\_comment\_begin) It 's like OOV when costuming as OOV Sure it 's not used in the traditional **sense** ( **hatred** and **bigotry** ) but you can convey the ideas without using the " offensive " part. Edit : OOV me in to the negative does n't make your point

(OOV\_comment\_begin) I 'm not OOV Are you **implying** that simply **showing** the symbol ( s ) is offensive ?

### 78\_ah\_t1\_cje26fi.json (ah-ah)

(OOV\_comment\_begin) OOV OOV Sure **children** are OOV The **question** is , how many of those **20** were **children** ? Until you can **answer** that , you have no reason to use the **word** **children** , do you ? OOV OOV Self Defense eh ? Is that what pushing into the coast and **bombing** an entire **population** of **millions** is doing ? OOV OOV How do you figure ? No **rocket** **attacks** are a **good** thing. The **fact** is that **Israelis** **attacks** have killed many more people than any against it currently or before. That is my OOV **Israel** is **killing** far more people than its had killed and far more OOV OOV OOV I never said it was OOV I said it was **wrong**. You sure like changing words and **statements** to make your **argument** appear more **cogent** , do n't you ? OOV **wrong** becomes OOV **Civilians** become **children**. OOV OOV Is **something** that happened in OOV reason to **kill** people today

? OOV Do n't Google Israeli military OOV OOV OOV Do n't Google Israeli military OOV OOV They did whatever they could do against a vastly superior OOV Exactly what Palestine is doing now .

(OOV\_comment\_begin) OOV I 'm glad you can not deny that other countries protect their people by killing other people and that Israel is allowed to do the same thing. Next time , try to not push your double standards so OOV OOV And how do you propose Israel stop the rocket attacks ? Let me guess , appease OOV Give the bully what he wants , and maybe tomorrow he wo n't want your lunch money. OOV Just think about how many people would be killed if Hamas did n't fire rockets at Israel. Now think about how many German and Japanese civilians were killed in WWII OOV American and British OOV Maybe you 'll realize that morality by numbers is no morality at all. OOV Apparently the framers of international law disagreed with you , because they made it OOV But I 'm sure you know best. Personally , I think using human shields is both wrong and OOV Do you disagree ? Please link me to examples of Jews in Poland during the Nazi invasion firing rockets at German civilians or strapping bombs to their children and sent them to kill other children or stabbing German children to death in their cribs or bashing German children 's heads against OOV You know , since the behavior of Palestinians reminds you so much of the Jews in OOV OOV No , they OOV They did n't murder German OOV They obeyed the rules of war and basic OOV Unlike Palestine .

(OOV\_comment\_begin) OOV OOV If the US was doing what Israel is doing currently it would be wrong as well. You 're not gaining anything to cite US military action as OOV There has n't been a defensive US military action in OOV OOV OOV Give the bully what he wants ? Like not being isolated to an open air prison and apartheid that is under blockade ? Or perhaps it 's food and medical supplies that are simply unreasonable ? OOV OOV And yet , here we are , Israel is killing something like OOV as many Palestinians with a good number being women and children. OOV OOV You just said it was OOV Now it 's wrong and illegal ? Not to mention being technically legal does n't mean something is right. Slavery was OOV Discrimination was OOV OOV OOV are OOV I do n't need to cite specific events or acts to prove that OOV has created an open air prison and apartheid in OOV As such they 've created a rebel movement with their actions of constraining OOV OOV OOV OOV the rules of war ? That 's a joke , right ? Like all rebellions they do whatever they can do with limited resources. And how would Polish Jews in Poland manage to kill German civilians , why would German civilians be in Poland during occupation ? That 's cute , like sugar filled candy saying OOV free ' .

#### 857\_ah\_t1\_d49xta3.json (ah-ah)

(OOV\_comment\_begin) The UK did once have widespread access to guns , OOV the OOV war for one. As you may know , it 's moved on since then so it 's not impossible .

(OOV\_comment\_begin) \*sigh\* That 's such a stupid fucking OOV You do realize that was literally OOV hundred years OOV , right ? You need to do a lot better than that .

(OOV\_comment\_begin) I 'm pointing out that it is possible to go from widespread access to guns to not having many at all. Mainly because you are insisting on people making comparisons with another country with similar numbers of guns per head to the US , and there are n't any .

#### 296\_ah\_t1\_ckqj3je.json (ah-ah)

(OOV\_comment\_begin) OOV Yeah , that is not how the saying goes , friend. The saying goes “ time is money. ” https : OOV You wan na sell the house fast ? Cut the price ! It will be off the market tomorrow. Sure , you tell yourself that the reason is “ ” it would take too much time to sell , ” but what you are really saying is “ it would take too much time to sell OOV a good OOV ” Sure , SOME things in life can not be accelerated for money. Real estate OOV is not one of those things. My point stands .

(OOV\_comment\_begin) So does mine. You sound like a joy to hang out with. Hope I get the chance to meet you OOV Have a good day ya bundle of OOV If you ever have an epiphany and realize that not every decision in life is made over dollar bills then come talk to me .

(OOV\_comment\_begin) OOV Yeah , as i said : “ Sure , SOME things in life can not be accelerated for money. ” I agree , not EVERY decisions is money OOV However real estate OOV - IS entirely money OOV OOV This is coming from a poster who LEAD with : OOV If you want a more civil discourse do n't start with accusations .

### 113\_ah\_t1\_cxt1te8.json (ah-ah)

(OOV\_comment\_begin) You 're also assuming tyranny can only come in the form of a looming government at large , and not a single person. For example : The sheriff in a tiny , rural town might be his own tyrant , carrying out his interpretation of law and justice as he sees fit. By the law , if he was to attempt to say , force his way into my home to rape my daughter ( and of course in this scenario he would not have a warrant , but even if he did , if rape was his aim , that 's not protected ) , I would be more than within my rights to shoot him dead in the OOV I ca n't do that without a gun , can I ? Tyranny is not just something that governments at large do. That woman who denied the homosexual marriage license ? She 's a OOV That was an illegitimate use of her power. Now that illegitimate use was not a forcible threat , so a forcible reaction in turn is not OOV But it 's just an example of how one government worker can be a OOV Surely you 're not about to argue that there 's never been a cop who stepped over the line and did something that , had they been a civilian , could have easily resulted in them being killed in self defense ? Look at the cop who recently stuck his gun down the throat of some civilian to show off. OOV guy is a OOV Had someone shot him while he was doing that , I 'm willing to bet that someone would 've been let off the OOV Even if they were n't , I 'd argue they OOV to have OOV .

(OOV\_comment\_begin) I 'm not sure what you 're driving at here. A sheriff busting in to rape someone is indistinguishable from anyone else busting in to rape OOV His office does n't protect him from the legal OOV So I 'm not sure how defining this as “ tyranny ” lends any further support to individual armament than the usual run-of-the-mill home invasion OOV I agree with OP , that it 's merely OOV Proving him/her wrong about what constitutes tyranny does n't seem to affect the topic of the OOV I 'm likewise perplexed by the reference to Kim OOV If your argument is that tyranny comes in many forms , and she 's your go-to example , then your argument is poor , because her tyranny was swiftly OOV OP 's point , or at least implication , is that our institutional mechanisms by their nature make the tyranny that gun advocates cite OOV Your example plays perfectly into that OOV OOV What exactly is the point of this rhetorical OOV ? What scenario are you imagining as the morally righteous counterpoint ? If you 're packing heat and a cop steps over the line , are you ( as you seem to imply ) less likely to shoot him because of his job ? And if so , how does having the gun help in the first place ? Anytime you cite self-defense as reason enough to own a gun , your argument , taken to its logical end , results in the same scenario : every citizen has their own gun , just on the off chance of a robber , rapist , or dirty OOV But can you genuinely imagine that scenario ? Consider the likelihood of one of those things. Now consider the likelihood that those guns get used for suicide , domestic abuse , second-degree murder of a wide variety of OOV Your advocacy boils down to a very simple statement , which you should be prepared to own if you really believe in it : OOV personal defense against a statistically unlikely event is worth many , many statistically guaranteed deaths of innocent OOV

(OOV\_comment\_begin) No .

### 1274\_ah\_t1\_cjhwtfk.json (ah-ah)

(OOV\_comment\_begin) It is n't as if either Hamas is bad or Israel is bad , they both share OOV Why is it just Hamas ' fault ? I 've agreed that they 're bad. That does n't absolve Israel of OOV Also , how do we even know that if Hamas was n't bad that Gaza still would n't be a shit hole ? A lot of Israel 's actions ( like limiting the total tonnage of trade ) has absolutely nothing to do with Hamas ' military OOV .

(OOV\_comment\_begin) OOV Because if Hamas OOV , Israel would immediately lift all OOV But no , they choose to launch missiles from hospitals and schools and then prevent the civilians from evacuating when the IDF warns them of an impending OOV OOV You have ? I saw no such OOV Also they 're not just “ bad. ” They 're fucking OOV OOV It absolutely does .

(OOV\_comment\_begin) OOV Really ? Limiting the amount of OOV goods has something to do with Hamas ' military ? Even if that were the case , this still does n't put all the blame on Hamas , Israel still has a choice as to whether they want to collectively punish the Palestinians who did nothing wrong. Person A saying “ I would n't punish person B if person C would just cut out their shenanigans ” does n't mean that person A is OOV Yes , C is wrong , but that does n't justify A 's treatment of B. OOV A quick perusal of my comments will show that I 'm pretty adamantly against OOV

OOV How ? Is Israel being attacked by flour bombs ? OOV rockets ? vegetable guns ? Maybe Israel is limiting these in response to Hamas ' OOV , but the question is n't " what does Israel do " ( which is trivial ) but " what OOV Israel do " . Israel ought n't punish civilians .

#### 519\_ah\_t1\_dgtuw05.json (ah-ah)

(OOV\_comment\_begin) So if a radio station is playing music a few people do not like should the radio station stop playing the music or should the few people just not listen to the station ?

(OOV\_comment\_begin) Whose radio station ? Because here we 're talking about students protesting someone coming to speak at their university .

(OOV\_comment\_begin) You are missing my point. This is about catering to the small cry baby groups because their feelings might be hurt if they hear something they do n't like. Society is coddling these people way too much. So if more students want to hear the speaker but a small group of people do not like what the speaker has to say it should be shut down ? No it OOV These few who do n't want to hear it go home. We have OOV They should n't be taken away due to hurt feelings

#### 931\_ah\_t1\_d0mtmjm.json (ah-ah)

(OOV\_comment\_begin) That 's what memes say. It is n't theft unless you truly believe that all wealth and poverty are equally deserved

(OOV\_comment\_begin) OOV if you put something in OOV it becomes invalid

(OOV\_comment\_begin) If that 's your only argument , you should reevaluate

#### 428\_ah\_t1\_cs2rqjk.json (ah-ah)

(OOV\_comment\_begin) Yay , I get it , trans people are unnatural and any medical treatment they receive is the result of our OOV society or whatever. I 'm going to drop this comment here , it explains it OOV If you do n't read it , I do n't give a OOV http : OOV Yes , OOV is gone. God I 'm tired of the people that have crawled out of the woodwork over that. It 's like we 've got one fairly positive OOV event , and now we have an event on top of that that seems custom designed to lance the biggest festering boil on this website and send every bit of infected pus from that boil oozing everywhere. The real victims here are going to be the innocents who are hitting this issue for the first time and trans people caught in the middle of this stupid mess .

(OOV\_comment\_begin) what ? i 'm fucking trans !

(OOV\_comment\_begin) Good OOV Horseshoe theory strikes again .

#### 992\_ah\_t1\_d0mw6ev.json (ah-ah)

(OOV\_comment\_begin) ... What ? In case you did n't notice , Cruz is second in the OOV Trump rode a OOV of Tea Party goodwill during his whole birther movement campaign years ago. The OOV Party split left the door wide open for Trump to come in and dominate .

(OOV\_comment\_begin) You 're talking in OOV that are impossible to indulge on an intellectually honest level. How could the GOP accommodate the Tea Party concerns ? Their entire agenda was shutting down OOV Trump is filling a void left by both the GOP and the Tea OOV OOV wont support Cruz , and Tea Partiers wont support the OOV You 're understanding of how the political landscape has evolved over the last 15 years is ... poor , to say the OOV I honestly cant tell if youre an unhinged right winger or left OOV You 're just friggin ... out there



(OOV\_comment\_begin) The GOP should n't have " OOV " the Tea Party concerns ; they should have booted them out. The bloody civil war since 2010 depleted the GOP of precious resources. http : OOV I do n't know if you noticed , but the establishment GOP does n't like Trump either .

### 158\_ah\_t1\_d4n0u4u.json (ah-ah)

(OOV\_comment\_begin) Every demographic vector is pointing to white British becoming a OOV Yet you call it it OOV OOV Y'know , unlike you OOV types , we nationalists actually have children. We want our grandchildren to grow up in free western civilized nations .

(OOV\_comment\_begin) No we just do n't see the fact that there may be less white skinned people in a country as a problem. And to be honest I 'm finding the fact that you are comfortable touting views like this around almost the most worrying effect of the vote today .

(OOV\_comment\_begin) It 's not the skin OOV It 's the culture. You fill up the country with Muslims , the country becomes OOV It 's not rocket OOV ; and no , we are n't going to be scared into silence any more. We want to live in a nation of westerners .

### 396\_ah\_t1\_de2x1z6.json (ah-ah)

(OOV\_comment\_begin) We use it here in Canada. You wo n't find any difficulties with our OOV Exact outcomes depend on what your goals are. 1. Or ... You can use a system of districts that does not require perfect looking blocks in order to account for it. There is a pretty obvious middle ground : Districts that are able to follow rules OTHER than completely irrelevant factors like OOV 2. What ? 3. OOV commissions makes it OOV If the people drawing it are experts , not participants , there is no OOV done at all. Shortest OOV is not a good system. There is a reason that no one uses it. Because it only fixes things by screwing them up in a somewhat impartial way .

(OOV\_comment\_begin) 1. Things that work in Canada wo n't necessarily work in the OOV But one data point is interesting. 2. Representatives , fight for the interests of their states more than their districts , because the economy of their district and state are so connected as to not make the distinction OOV 3. There are a number of non-partisan organizations in the United States that end up being very OOV The council of economic advisers , the congressional budget office , the FED , and even the courts to a certain OOV So yes I believe that a non-partisan commission could OOV despite being having good OOV Shortest OOV has n't been adopted because law makers do n't like giving up power especially when so many of them are using OOV to great effect right now .

(OOV\_comment\_begin) 1. Multiple US states also use it. 2. This just is not true. Do you REALLY think a congressman in a Latino district will oppose immigration reform ? Or an evangelical district will support abortion ? Politicians have to cater to the people who vote for them. Regardless what is good for the state. This is why people in West Virginia keep voting for the people who tell them coal is coming back rather than the ones who offer job retraining 3. Your philosophy is frankly OOV These commissions are all over the place and they simply are not OOV If they were , they would be forced to redraw the lines. Shortest OOV is not adopted because literally EVERYONE who studies the effects of redistricting thinks it 's a moronic plan. OOV The only time it is even discussed in an academic context is as an example of how badly simple algorithms are at producing desirable results .

### 600\_ah\_t1\_cxl9545.json (ah-ah)

(OOV\_comment\_begin) OOV And then you say : OOV OOV no OOV Just like not all Black people are from first generation African immigrant families. Obamas children clearly are n't facing the same burden as black people growing up in the hood , and they are n't facing the same burden as someone who just came from Africa. OOV And you do n't see a problem with doing the exact same thing to white people ?

(OOV\_comment\_begin) I 'm saying that the problem already exists for black people , and ( unsurprisingly ) you only seem to care when it affects OOV And using the example of rich black family to claim that overall systemic prejudice against black people does n't exist is supremely fucking OOV I guess global warming does n't exist either , because last week was colder than OOV And furthermore , being rich does n't protect you from many kinds of racial OOV You do n't have to worry about systemic poverty , but you can still get profiled , treated unfairly by police , businesses etc. Just recently , NBA player John Henson was denied entry into a jewelry store and had the police called on him. I wonder why ? I assure you that there are a OOV more examples .

(OOV\_comment\_begin) Let 's get one thing straight here : The ONLY OOV who are trying to downplay the experiences of racism by others ... is OOV I 'm not denying black people face it more , or worse ... I 'm just saying white people can face it too. OOV Just like using rich white people to claim that systemic prejudice in areas ca n't exist against white people is supremely fucking OOV Again , the only person denying others experiences is you. You need to get that through your head .

### 1238\_ah\_t1\_d38js3t.json (ah-ah)

(OOV\_comment\_begin) OOV OOV It 's not in a single country , but OOV Egypt , Mauritania , Sudan , Afghanistan , Iran , Iraq , the Maldives , Pakistan , Qatar , Saudi Arabia , Yemen , and certain regions in Indonesia , Malaysia , Nigeria , and the United Arab Emirates all have partial implementations ( with most of the law coming from or dictated by OOV Less strict legal adherents ( which have laws based on Sharia law but settled in secular courts ) include Algeria , Comoros , Djibouti , Gambia , Libya , Morocco , Somalia , Bahrain , Bangladesh , Brunei , Gaza Strip , Jordan , Kuwait , Lebanon , Malaysia , Oman , and OOV The only muslim countries with no implementation of Sharia law are Burkina Faso , Chad , Guinea , Guinea-Bissau , Mali , Niger , Senegal , Tunisia , Azerbaijan , Kazakhstan , Kyrgyzstan , Tajikistan , Turkmenistan , Uzbekistan , Albania , Kosovo , and OOV All others have SOME level of Sharia law in place. OOV Good job completely missing the point. Yes , SOME muslims speak out against OOV MOST say nothing at all. OOV I do n't think that they need to , but THAT IS NOT THE OOV NO ONE CLAIMED THAT OOV ARE NOT OOV AGAINST OOV

The OOV of the group is not fighting against it , and the fear is that the OOV will continue to turn a blind eye to it since they have no OOV Yes , SOME of them are speaking against it , MANY of them are opposed to it , but the problem is that MOST are doing nothing and THAT is what is scaring people. They are afraid of the good people in the MIDDLE that make up the OOV will do nothing. Pretending that I said that there are n't muslims fighting against terrorism is nothing more than a strawman Ignoring the concerns that people have about inaction from the potentially sympathetic majority is dishonest at best. Flat out lying about the implementation of Sharia law in the muslim world is just that : Flat out OOV And if my tone in this comment seems a bit harsh compared to the previous ones , that is the reason. I am not partial to either side of the debate , and if I have any bias , it is in favor of allowing immigrants into the country. But for you to be this dishonest while OOV indignation at the supposed dishonesty of another is , to me , OOV You put words in my mouth and then lied flat out .

(OOV\_comment\_begin) OOV So ... they have picked some Sharia laws to incorporate into their legal system ? Most of the laws that are used are civil , not criminal law. That means it governs things like marriage , divorce , inheritance , etc. Some of the worse countries implement criminal punishments as well , but no country implements all of Sharia law. The closest are Iran and Saudi Arabia , but even they do n't implement it OOV OOV You 're seriously going to suggest that no one has claimed that Muslims do n't fight or speak out against terrorism ? Here is an article from a rightwing site with language which sounds very familiar to what you were OOV [ Why wo n't Muslims OOV Islamic Terror ? ] ( http : OOV ) OOV Conservatives in this country have been spreading bullshit like this since 9/11 despite it being repeatedly contradicted with evidence of Muslims speaking out. On top of that we 've got Presidential candidates calling for an unconstitutional ban on Muslims entering the country. Another who just thinks we need more police to patrol " Muslim Neighborhoods " . Another who compares them to rabid OOV It is incredibly ignorant to claim that none of the anti-Muslim rhetoric is bigoted in nature. OOV This is just the same unsupported bullshit as before. Most Muslims do not support terrorism and claim that violence against civilians is OOV OOV [ Muslim OOV Share Concerns about OOV Groups ] ( http : OOV ) OOV In fact , a higher percentage of people in the US and Canada believe that [ violence against civilians is sometimes justified ] ( http : OOV ) than in the Middle East and North Africa. I suppose that is evident because The United States has killed hundreds of thousands of civilians and no one seems to care .

(OOV\_comment\_begin) OOV So you are still being deliberately OOV The first set of countries I gave you do in fact use

Sharia as the basis of their criminal law. The second does so as well , only to a lesser OOV The only ones that do n't are those in the last group of countries I gave you , but I do n't know why I would expect you to be honest about it at this point. " You 're seriously going to suggest that no one has claimed that Muslims do n't fight or speak out against terrorism ? " Oh , brilliant , now you are going to try and twist what I said , OOV I was clearly speaking about how you were putting words in my OOV , to mean something else. Yes , because context does n't mean anything. You really are a dishonest little thing , are n't you ? OOV And you continue you prove it by attempting to completely sidestep what was actually said. And you do so by saying how most muslims do n't like terrorists , something I , once again , never fucking said. Saying that the majority of a group does not commit to action is NOT saying that said majority OOV anything. OOV You know , its funny how you include something that has literally nothing to do with this. Or at least it would OOV funny if you were n't being so dishonest already. It 's clear at this point that you are n't talking to me , you are talking to someone in your head that 's saying something else , and then trying your best to find what THEY say in my words .

### 1028\_ah\_t1.co8rssj.json (ah-ah)

(OOV\_comment\_begin) OOV I have no issue with that. But this comes up every single time this debate does , and the answer is always the same : if that 's where you think the issue is , where is the suspicion towards infertile cis women ? They make up something like 10-15 % of the female population ! But no one ever freaks out about dating an infertile cis woman , they freak out about the - fifty or so times less common - trans people. OOV If that is genuinely true , it OOV But 99 % of the time , that 's OOV OOV No , because the male/female distinction is a material difference. Trans OOV woman is not , provided they are otherwise physically OOV OOV In this instance ? Because I 'm right. I 've explained the reasoning literally like a hundred times in this OOV OOV The " why is it the responsibility of cis heterosexual men " implied some sort of special OOV I was responding to that. OOV Because when I 've debated it - and I have done so more times than I 'd wager you 've even considered the question - it has without exception always come down to " because she 's still a man in some sense " . Now , I 'm not gon na say my anecdotal sample is a 100 % sure thing. But which do you think is more likely : \* Not wanting to date a trans person is culturally trained OOV There 's a sharp difference in willingness to date trans people between OOV ( a majority , around 65 % a poll I ran over on OOV ) and OOV ( essentially none ) people. There 's a clear difference between public behavior ( where it 's common to express revulsion ) and private ( where trans porn is incredibly popular ) . And when debated , it virtually always comes back to rejection of a trans persons ' OOV Or : \* Not wanting to date trans people is innate , despite there being no evolutionary or biological reason for it given that a modern trans person has been possible for less than a century. OOV Yes. But with two caveats : one , I 'd ask you to take a second , examine OOV you think that attraction would vanish , and in the very likely event you find lurking OOV , to deal with it. And two , that the first eight words are virtually certain to be false , because statistically you 're gon na pass a trans woman every few days on the street and one of those women , sometime , was probably attractive enough to catch your OOV I 've gotten OOV OOV OOV I think you 're giving these folks OOV too much credit .

(OOV\_comment\_begin) OOV 99 % of the time you are an arrogant fuck , you know that ?

(OOV\_comment\_begin) No ( well okay yes , but not in that statement ) , I 've just done this particular dance fifty times .

### 263\_ah\_t1.dn9m609.json (ah-ah)

(OOV\_comment\_begin) No , I actually don't. You quoted one thing , highlighted a word , and ignored the OOV There is no OOV No significant impact is the same as no OOV Nobody is going to look at an election that has OOV votes and say " aha ! A vote with 10,000 votes is n't legitimate , but OOV votes is clearly OOV legitimate ! " when you 're dealing with numbers that are 5 orders of magnitude higher. You 're grasping at straws , and you know it. You 're wrong .

(OOV\_comment\_begin) No I 'm presenting a logical argument , you 're asserting claims without presenting any OOV For example , " No OOV impact is the same as no impact " is , based on ordinary understanding of the English

language , not true. You merely assert it. Let me show you why it 's not true by presenting a logical OOV The opposite of “ significant ” is “ insignificant ” , so something can have no significant impact but sill have an insignificant OOV OOV is not the same thing as zero or “ no ” , so something can have an insignificant impact but still have “ some ” impact , not “ zero ” or “ no ” OOV Therefore , “ no significant impact ” is NOT the same things as “ no impact ” . See the difference ? You assert , I OOV You 're done here .

(OOV\_comment\_begin) Based on a layman 's understanding of how statistics work , this is true. But the way statistics work , there is no difference between no difference and no significant difference. We are talking about statistics since that is all voting is : applied OOV You are the one that is done seeing as you do n't even know what you 're going on about re : statistics , which is the topic at hand .

#### 1121\_ah\_t1\_dmkvzpe.json (ah-ah)

(OOV\_comment\_begin) And There are no cats in America too. The idea that there is no racism in America is OOV I guess places like this do n't exist in your world view. And I also guess that you tend to forget about people like this https : OOV You can chose your OOV You ca n't chose your facts. https : OOV

(OOV\_comment\_begin) Wow , one whole instance of a police chief OOV Your little NYTimes article is saying they found “ bias ” in such cases such as “ Minor , largely discretionary offenses such as disturbing the peace and OOV were brought almost exclusively against OOV ” Almost as if , who would have guessed , blacks commit more crime ? OOV You 're right.

There is racism in the US today , but it 's only against white people and OOV Blacks and OOV “ racism ” that they face is being given benefits over white people and Asians that they do n't OOV ” Princeton University study concluded that Asians get penalized 50 points from their SAT scores but Hispanics gain a 185 score bonus and African Americans gain a 230 score OOV ” http : OOV # Racism against blacks does not exist in the OOV Blacks being overwhelmingly criminals however , does .

(OOV\_comment\_begin) So you seem to be one of those facts do n't matter people. Take care. There is no need to talk with anyone who simply will ignore what they do n't want to OOV Take care .

#### 1074\_ah\_t1\_df6ggs.json (ah-ah)

(OOV\_comment\_begin) ( 6C ) That was a news piece on a guy who wrote a book but you criticize my use of a real scientific source ? . I imagine if he was an expert he would be called “ doctor ” not “ author ” . And his quotes reek of sensationalist writing : “ There is a point where plants and animals just ca n't survive anymore ” . The fact that I live where it averages OOV and 100 miles away it averages OOV proves that 6C wo n't get us to that point. I 'm not a senator bringing a snowball into congress to prove global warming isnt real , I 'm stating that the expected worst changes possible are already observable all over the world and people are doing fine. And seriously ! Get it together ! I was replying to a comment that only contained a link to the 2C study. I 'm not going to just respond to a point you have n't even made .

(OOV\_comment\_begin) Now I understand how Trump won .

(OOV\_comment\_begin) Trump winning had nothing to do with reasonable criticism of sources and OOV Him winning had nothing to do with reason at all .

#### 178\_ah\_t1\_cnrjs60.json (ah-ah)

(OOV\_comment\_begin) Except respect works both ways , and if you asked me to call you that I would not respect you , so no. I wo n't call you that .

(OOV\_comment\_begin) Ah so when you said we should call people what they asked to be called ... you did n't mean it ?

(OOV\_comment\_begin) If you respect someone , you call them by the title they OOV If you do n't respect someone call them whatever you want , which is disrespectful - which is kind of the definition of not having respect for someone right ?

If that was n't clear ... well that 's just OOV Hope your comment scored you all the brownie points you thought it would for trying to be clever .

### 1211\_ah\_t1\_d7c6m08.json (ah-ah)

(OOV\_comment\_begin) See ? You are insisting on the mainstream out of hand. OOV is equally scientific as marginal theories , comparing it to creationism is OOV Saying that such an economic theory can be disproved and discarded is beyond our means , since it 's a metaphysical area in the first place. Marginal or subjective theory does not explain the the precise value that prices fluctuate on either. No I am not talking about business cycles , I am alluding to that fact that capitalism has been around for two centuries and has evolved structurally on several key OOV Current OOV economics could never predict these shifts , or allow for OOV It is immutable a priori .

(OOV\_comment\_begin) There is no marginal theory of value. See ? You are insisting on commenting when you do n't even know what it is you are OOV It is the subjective theory of value , not OOV It is a fact OOV is true. I do n't know if you are talking about OOV or the subjective theory of value at this point. OOV is as true as the law of OOV I 'd be willing to bet my life it 's true. It 's a OOV OOV No , it 's not. The labor theory of value is easily OOV A water bottle might be worth \$ 0.50 to you now , but if you were in a desert dying it would be worth a hell of a lot more to you. OOV Since physicists do n't know how the big bang happened , let 's dismiss the big bang theory

(OOV\_comment\_begin) I 'm sorry that it bothers you to refer to OOV by other OOV You do n't get any points for naming theories of OOV I do n't care. You are so fixed on mainstream economics that you equate OOV with " the law of gravity " ( by which I assume you mean " what goes up must come down " : Newton 's Law of Universal OOV has been superseded by general relativity ) . This is however a good way to illustrate my point. OOV only applies in a capitalist economy. If we were to move to a OOV economy it does not make sense. Equally , if you move close to a neutron star , Newton 's Law of OOV does n't OOV One can begin to see cracks in OOV when considering intellectual property. Almost all songs are \$ 1 on iTunes , is this really their value ? What does OOV say ? OOV does not discount the effects of supply and demand , so a drought in the desert is n't exactly a silver OOV It does explain how prices tend to zero in a OOV economy. And to your last point , it 's physicists that predicted that a big bang occurred , and how the universe should look as a result. The standard model is attempting to understand more precisely the OOV I know its really hard for the discipline of economics , it is tasked with explaining highly complex emergent properties of human OOV How on Earth do you expect to mathematically model that with any predictive power ? Additionally if you put enough parameters into a model you can get out any answer you want , e.g. neoliberal mainstream economics .

### 143\_ah\_t1\_dn02bcy.json (ah-ah)

(OOV\_comment\_begin) OOV if you are attracted to someone , how are they not respecting your preferences ? doing whatever you end up doing with them \*is\* based on your preferences , they are n't forcing you to do anything , right ? OOV the problem here seems to be that , in this scenario , you are attracted to someone , who you think you should n't be attracted to. i do n't think that 's something you can blame the other person for. if it 's really important to you that the other person was born biologically female , even though you 're attracted to her anyway , you should just OOV why should it be the responsibility of all trans people to disclose their OOV , if people who are worried about that can just ask ? - - i think your own counter arguments ( colored hair , plastic surgery ) are pretty good , so i do n't have much more to say .

(OOV\_comment\_begin) If you think its gon na fly asking every girl I meet if she were born a man you have much to learn about women. Hormones or not .

(OOV\_comment\_begin) no , i do n't think that 's gon na OOV but it 's clearly preferable to demanding that every trans person discloses their OOV , just in case the other person cares about that .

### 712\_ah\_t1\_cvt22sf.json (ah-ah)

(OOV\_comment\_begin) Reading through the comments and I could n't get over this. Heavy duty ? That 's an undefined term that has no basis other than how you feel about guns you seem to know very little about. OOV are ordinance not Arms ( which is enumerated in the 2nd Amendment ; " Right to Keep and Bear Arms " ) , as is any indirect and indiscriminate weapon ( grenades , machine guns aka assault rifles , OOV ) Not completely illegal to own but so highly regulated most people do n't have the money or concern to OOV So drawing comparisons to a completely different class of weapons which have no basis for self-defense is simply OOV " Assault rifles " are OOV machine OOV They have n't been



used in any mass shootings people here are discussing because machine guns are regulated strictly under the NFA of 1934 and the OOV of 1968 .

(OOV\_comment\_begin) Holy OOV There 's no shortage of fucking gun OOV I know what OOV are and I used them as an extreme example to make a point , which apparently you completely OOV I do n't know how , but you did. It is sensible to begin control with the weapons that can inflict the most damage in the shortest amount of time. It 's not fucking rocket science. I do n't know why so many gun OOV think it is necessary to be a gun expert in order to know guns should be OOV If you were smart , you would want more control , because this will either end in control that curbs gun violence , or it will end by amending the OOV It 's not complicated .

(OOV\_comment\_begin) Your example of OOV was a red OOV You brought that in to make a correlation between arms and OOV Also , your use of a nonsense term like OOV duty ' demonstrated that you needed a lecture to understand the difference. Did n't realize I was talking to General Pershing over here. I 'm glad you understand , now , the difference .

#### 1160\_ah\_t1\_dlpu8ih.json (ah-ah)

(OOV\_comment\_begin) The majority of white people do nothing to promote the idea that whites are always scheming how to ruin a black persons day. That kind of thinking is wrong and possibly OOV Slavery is bad , and whites end western OOV Therefore , whites were the best thing to happen to slavery in OOV Slavery still exists in places today that do not have a large white population. Do I need to continue ? How do you go from affirmative action and diversity laws systematically giving preferential treatment to minorities , to black people suffering ? Like what ? Maybe we can praise white people for ending slavery in the United States while it persisted around the world. Black people do have the same legal OOV Please show me a current law that discriminates against black people. I already brought up the systematic preferential treatment of black people. You have a very one sided view of things , and it 's making you believe in very incorrect OOV Where did you even get any of those ideas ?

(OOV\_comment\_begin) Have you ever heard of redistricting ? Are you aware of disparate sentencing and bail treatment of minorities compared to white people. What about police treatment ? If you have n't , go look it up. If you have , stop playing dumb .

(OOV\_comment\_begin) Are you aware of slavery ending in the US ? It was done so by OOV So you kind of owe me an apology and a thank you .

#### 586\_ah\_t1\_cym18gd.json (ah-ah)

(OOV\_comment\_begin) Name any decision from sex to birth that women do n't have full control over .

(OOV\_comment\_begin) Whether or not to have sex. What birth control forms to use. Whether or not to give the child up for OOV How much custody of the child each parent gets .

(OOV\_comment\_begin) OOV I too like teaching OOV birth control. OOV Not true. You can either use a condom ( which she has 100 % control over ) or not have sex. The planned parenthood birth control page shows condoms for men and like 15 forms of bc for women. OOV You ca n't be serious at this point. You ca n't just \*not\* know , especially being on this OOV Like three times a week the " legal paternal surrender " OOV gets OOV [ Show me any article where the man decides to put the kid up for adoption when the woman did n't want to. ] ( http : OOV ) OOV under a minute old and you already OOV me without even reading my OOV Yeah I 'm done .

#### 982\_ah\_t1\_dktbgf0.json (ah-ah)

(OOV\_comment\_begin) OOV OOV , look at the triggered little OOV OOV OOV , resorting to OOV again OOV More or less OOV I object to this OOV , the word defend and how it 's being used here by you carries connotations of their being

something wrong with the butt of the OOV Theirs nothing to OOV Since theirs nothing wrong with them. OOV You know I think you could find some things in my life which you could accurately call cowardice and I 'll admit that. This is n't one of those times. Despite how many times you might say it. Have you ever heard of a OOV argument ? OOV No idea where you got this from. What makes you think I see myself as extremely funny ? But let 's not forget that there 's another funny thing going on here. A triggered OOV ; ) OOV Lol

(OOV\_comment\_begin) OOV It 's hilarious that you think calling me a social justice warrior is somehow an insult in the thread I created explicitly to say that being an OOV is good. Check this out asshole : It 's a OOV to me to be called a warrior for social justice. The fact that you obviously think it 's an insult reveals a great deal about the kind of person you are : a tiny , insecure mean little brat who has never deeply engaged with anyone different from yourself in any substantive way. People like you live cloistered , pathetic little lives , growing older and more isolated and dying as sour embittered husks having never truly OOV Change your perspective or get fucking OOV OOV Also learn to spell , idiot .

(OOV\_comment\_begin) OOV Your making it one OOV In its original sense , yes. But people like you make it a joke OOV Whatever helps you sleep at night OOV Have a good one

### 515\_ah\_t1\_djpfbva.json (ah-ah)

(OOV\_comment\_begin) OOV It 's because you are OOV really too concerned about how others perceive you , but ok , I 'll OOV OOV Probably this part after you said you believe in privilege dynamics “ wholeheartedly ” ( obviously not OOV ) . Fail to mention the police or OOV Oh and the part where you say you are all these things , and then shit on your friends for being “ rad leftists ” , and call them “ OOV ” for arguing with you , and virtue signaling to moderates and right-wingers for internet points , by saying that you are better than they are because you are n't a “ radical leftist ” and “ authoritarian ” like they are. lol It 's absurd .

(OOV\_comment\_begin) OOV OOV I 've got an OOV Most people do. OOV Explain what you mean by that. OOV What does this have to do with anything ? If you want my specific take on the police add military , I 'm actually really bothered by the fact that in 2017 police brutality against minorities is still a significant problem and while I believe in a small standing military I believe that war is only ever justified as a home defense act and beyond acts of home defense is barbaric OOV OOV I would n't call saying that “ I love them ” but “ I 'm not impressed with how they treated the issue of the flag ” shitting on my friends but OOV Your whole attitude in this exchange is indicative of the entire problem OP is describing : the tendency to treat dissent as a personal failing of the OOV while simultaneously feeling viciously attacked by the fact that it OOV OOV If that 's how you want to see it. OOV OOV This is funny OOV I 'm no friend to OOV They would n't appreciate my opinion on their barbaric faith or their callous economic policies , simultaneously trying to legislate religious morality while empowering exploitative capitalist greed and cutting the poor and hungry OOV I can police the left 's OOV behavior from within without OOV myself that the left is even remotely as bad as the right OOV But what should I OOV Your tendency to attack strawman paints a bleak picture of your ability to consider that people may not be caricatures of a political position but in all likelihood hold nuanced views on things .

(OOV\_comment\_begin) OOV Class privilege is a huge OOV All the other privileges intersect heavily with it. If you support “ regulated capitalism ” you still support OOV If you support OOV , you may as well also support racism , sexism , OOV , because they intersect completely with class. OOV Your failure to mention either in your diatribe of , “ Look how progressive I am ! ” is telling to me. I mean , I read your comment history to see what your politics OOV That 's why I called you a OOV OOV You are n't a OOV Your beliefs in this case , match the status OOV Your “ radical leftist friends ” are n't authorities , and they have no power over you besides the ability to harm your fragile OOV Same goes for all the other moderates and right-wingers who believe someone telling them they are wrong is indicative of some kind of systemic problem. OOV LOL that is you ! I do n't feel attacked in the OOV Literally this whole idea exists because you and others feel like you are being victimized for being told you are wrong , or that your opinion is OOV Your first comment that I responded to was me basically telling you and others are not victims of OOV Holy cow what

a lack of self OOV OOV That 's not how I see it , that 's how it is. OOV I 'm not your OOV You are literally doing exactly as I say , virtue signaling to internet strangers for internet points. And your economic beliefs fall well within OOV , so you can chill .

#### 1145\_ah\_t1\_d2gcz3m.json (ah-ah)

(OOV\_comment\_begin) You do n't have to deserve your rights. They do n't work like that. For example , children have the right to an education. We do n't pick children who are more deserving .

(OOV\_comment\_begin) Well actually they do work like that. The fact that felons can not vote is proof of this .

(OOV\_comment\_begin) Where I live , felons can vote. So , I do n't see your proof .

#### 511\_ah\_t1\_ddbag88.json (ah-ah)

(OOV\_comment\_begin) OOV Well first of all , the Berkeley College Republicans did n't invite Milo to debate , they invited him to OOV Secondly , letting someone just have their platform is n't just tolerance to a certain point of view , it 's submission to it. Peaceful protest is a method of speech that allows those without platforms to challenge those with OOV If you are committed to free speech then you should be applauding the 1,500 students who used their first amendment rights to peacefully let their voices be OOV OOV Read my sentence again. What I am saying is that if I were a member of an academic board at an institution and my colleagues and I wanted a conservative speaker , I would n't let Milo speak because Milo 's history of harassment and " troll " personality makes him a detriment to OOV I would have no problem with inviting other OOV OOV like Richard Spencer and bullies like Milo have no place in OOV OOV What are you talking about ? Milo has consistently framed himself as a representative of the OOV OOV Do n't get me wrong. I think there is a problem at college campuses with people trying to silence conservative OOV However , I do n't believe Milo is a victim of that OOV Milo gets protested everywhere he goes because he has made it his personal mission to piss off , bully , and harass everyone with views that are to the left of his own. Condoleezza Rice has been protested before , but she does n't get protested everytime she visits an academic OOV I think it 's fair to say that Milo brings it on himself .

(OOV\_comment\_begin) What does n't belong in academia is resisting the free exchange of ideas. It 's morally wrong , and it never works for the people doing the OOV People latch on to censorship when they feel their beliefs ca n't win in the free marketplace of ideas. There 's a good reason nobody bothers trying to silence the left-wing equivalents of Milo and Richard Spencer .

(OOV\_comment\_begin) OOV Colleges have limited platforms and space for public speech. Why does that platform belong to people who express fringe theories with no academic support and people who bully and harass the student body over artists , scientists , innovators , professors , experts , policymakers , CEOs , politicians , religious leaders , respected journalists , and Nobel prize winners ? Why should OOV and internet trolls be the new standard of academia ? What do they offer that 's being left out ? OOV Why should a school provide a platform to all ideas ? Should MIT lend it 's platform to a scholar of Victorian Literature ? It 's not a useful subject for the students at MIT unless the professor can coordinate it into the STEM experience in some way. Should our colleges be giving platforms to creationists even though their ideas have already been proven to be unquestionably false ? Should colleges be giving speaking platforms to serial killers and cult leaders ? Some ideas simply are n't OOV We do n't have to constantly discuss whether or not the earth is OOV We as a society have moved past that point , and that 's OOV One can still be a successful astrophysicist without ever having to debate a OOV OOV Where are the left wing Nazi sympathizers being invited to college campuses ? I 'm not seeing them .

#### 766\_ah\_t1\_dkw4m70.json (ah-ah)

(OOV\_comment\_begin) OOV I hear this from leftists all the time , yet when I spend hours every day among conservatives on the net and IRL I fail to see it. OOV I have not heard about this and a quick search came up empty , but if you give me a link I 'll read it. OOV Absolutely , but that 's not OOV in the OOV The military refuses to hire tons of people for different reasons which is not discrimination , since serving in the military is OOV a OOV People with lots of different

mental disorders are turned away , for example people with severe depression , but saying that it 's " OOV discrimination " would be OOV It 's freakin ' common sense that people who present a higher risk than others are not allowed to OOV Trans people are in this category , it is a known fact that they are prone to suicide and depression , they are a risk to their peers in the OOV If you think Trump just cooked up this idea because he hates trans people you 're just being OOV OOV I do n't think anyone should be fired for this specific reason but as far as I know what has been going on for decades now is that many employers hired LGBT people fulfilling quotas and OOV people got fired for it. ( The first example that comes to mind is the BBC and I know that 's in the UK , but it happened in the US as well. ) People who did n't raise their voice then should keep their mouths shut now , if what you say is true at all. OOV What the actual fuck now , did we already forget that Obama and Hillary were the biggest pals of middle eastern oil OOV ? Hillary got half her campaign funding from Saudi Arabia - Trump went there and told them directly to cut out the terrorist OOV Also , Trump OOV the travel ban for the six muslim countries , is n't it more than a little bit disingenuous to call him a muslim supporter after calling him an OOV for months ? He addressed the LGBT community saying he will protect them from islamic terrorism , which he 's actively working on , for God 's sake .

(OOV\_comment\_begin) OOV of course you have n't because you no doubt read nothing but insane right wing blogs all day. https : OOV OOV It is absolutely discriminatory and bigoted to pass a blanket ban on ALL OOV , regardless of their fitness to OOV What Trump called for was a ban on ANY OOV , not OOV who have depression or are prone to depression , not just OOV who are in transition or have high medical costs , but ALL OOV There are numerous examples of OOV who have served their country admirably , and even those who have been awarded high honors for doing so. The fact that Trump is banning these people OOV BECAUSE they are trans is bigotry plain and simple OOV Was I talking about Hillary and Obama ? No. The point at issue is whether Trump has expressed support for dictators who murder gay people , and the fact is : he OOV You 're cowardly changing the subject here because I 'm right and you know it .

(OOV\_comment\_begin) OOV Says the guy linking to the NYT , a former newspaper : ) So let me get this straight , the question is " does Title VII cover sexual orientation ? " , and the OOV 's answer is it does n't , because , well , it OOV The text is clear and sexual orientation ai n't in it. How exactly is this some nefarious scheme against gays again ? Also , the guy in the actual court case was n't fired because he 's gay , he was fired because a customer complained about his behavior to his OOV I know it does n't seem too much of a difference for those who want to lie that he was fired for being gay , but it 's a huge difference for anyone who cares about the truth. OOV Yeah , just like it 's discriminatory for the military to pass a blanket ban on ALL OOV , OOV , and so on. Your point being ? What you do n't seem to understand , or rather , what you want to lie about , is that trans people are not banned from the military for the sole fact that their genders do n't match the sex they were born with. Nobody gives a curly fuck about that , including OOV OOV do n't OOV They are banned because 1. statistically speaking they pose a higher risk than others as they are prone to mental problems which is an absolute no-no in the military ; 2. the LGBT activists ( pretending to represent trans soldiers who never asked for it ) keep on demanding stuff the military does n't want to pay for , quite OOV Maybe , just maybe , if the LGBT activists stopped demanding insane bullshit like sex change operations paid by the taxpayer , the military would n't view trans people as a OOV Maybe you guys have overplayed your hand and normal people are fed up with your OOV And let me make this abundantly clear as I know you will have a sudden urge to misrepresent what I 've just said : our problem is OOV with trans people , it 's with OOV activists who stir shit up constantly in the name of others. In this case the conclusion is that OOV activists have fucked trans people over because they spewed so much bullshit the military got annoyed and solved the problem OOV OOV You do realize , right , that nobody can tell if anyone else is trans until they self-report it , so for all intents and purposes every single employee of the US military can be trans as long as they do n't make a fuss about it ... ? This move was n't designed to hurt trans people whose OOV dream is to be a soldier ( like , 3 people in the US ) , it was designed to curb the OOV OOV OOV Yeah , and banning triple amputees OOV BECAUSE they 're triple amputees is bigotry plain and simple. I ca n't decide if I should admire your pure hatred for something you do n't understand and thus need to lie about constantly to justify your hatred of it , or be afraid that if this shit spreads any further your kind will begin murdering innocents and start a fuckin ' civil war. You 're a menace to civilized society. OOV It 's hilarious that when your side does something it 's perfectly fine but when the other side does the exact same thing it 's OOV OOV much ? Also , just to make it clear , what your side did was waaaay worse , you armed ISIS and destabilized Libya and Syria , Trump just wants to clean up this OOV OOV I doubt he ever expressed support for islamic dictators considering YOU GUYS bashed him for being OOV ever since he started his presidential campaign.

Also , please explain Linda OOV to me , or more specifically how an insane OOV OOV wannabe terrorist OOV can be a de facto spokeswoman for the democratic party in the US ? You accuse Trump of being too friendly to islam when he ordered the infamous “ muslim ban ” while his opposition is in part lead by radical OOV ? Mind blown .

### 433.ah\_t1.cnwkw11.json (ah-ah)

(OOV\_comment\_begin) I have had many encounters with CPS ( not for me , regarding others ) and I am thoroughly and completely OOV Their job is to protect children yet I have never seen them actually do that. Working in a hospital and being married to a nurse , I have had much contact with patients of all OOV The lack of oversight in this area OOV me. Here is one example. I knew many NICU nurses who talked on a regular basis of babies who were not only born early as a result of cocaine or other drug use , but actually went through withdrawals from OOV They were so sensitive that if a nurse dropped a pen , the baby would wake up screaming and it would take hours to get them back down. On more than one occasion , the nurses caught the parents still snorting WHILE AT THE OOV In all cases , this was documented ad nauseum and nothing was ever done. There were also many parents who 's baby had low birth weight due to marijuana and they would show up to the hospital OOV of OOV More recently , I have met many home health nurses who have spoke of parents addicted to pain medications who would basically knock themselves out and leave the baby to scream from sitting in their own excrement for hours. I have heard of rat infested homes , drug abuse , child abuse ( actually slapping an infant ) ... even with documentation , the kids remain with their terrible parents. With all this in mind , I firmly believe the CPS is a waste of resources. Of course , this is all from anecdotal experience so maybe others have had better OOV All of my experience has been from various parts of Texas , if that matters. EDIT : Wow ! Thanks for all of the responses ! I should have been more clear in my view ... CPS , AS IT OOV NOW , is OOV Many of you have pointed out the more resources are needed and after thinking I do OOV I only know what I have seen and experienced and greatly appreciate the input many of you OOV I will go through and award deltas when I get a break from work. Edit 2 : This has been very educational and I could give deltas to most of you ... except for the one OOV It 's hard to see things when you have tunnel vision built from personal experience. Good evening all Edit 3 : If I miss anyone on a delta , OOV Many of you posed good arguments but there were A LOT of OOV Edit 4 : Trying to give out deltas but they keep kicking back. I 'll get it figured out .

(OOV\_comment\_begin) Jesus what a goddamn OOV You have no idea the breadth and extent of the bureaucracy , the legal wrangling and the pure human dysfunction these people have to deal with. Its easy for some OOV viewing in isolation their friend bitching about their problems with OOV Its another thing to actually do the work OOV They are no better or worse than any government service , they are just dealing with the most emotional sensitive part of our society. So give them a fucking break .

(OOV\_comment\_begin) Wow , love the ignorance in your OOV Because I only know what I 've experienced , I 'm an OOV Ignore that I posted this hoping to hear something different ... go back to being a keyboard hero and leave the talking to the adults .

### 1164.ah\_t1.copkqkl.json (ah-ah)

(OOV\_comment\_begin) You said “ common people , ” not me. All of this pretension is just something you 're OOV All I said was that most people do n't have a large vocabulary , and you will often be OOV and ridiculed for displaying one. You do n't work with men , do you ? Or interact with city “ thugs ” ? Using terms like “ common people ” is a lot more telling of you than it is of me .

(OOV\_comment\_begin) Do you intend OOV to mean something other than common or ordinary ?

(OOV\_comment\_begin) Yes , I intended it to mean [ its OOV ] ( http : OOV ) Are we done here ?



### 935\_ah\_t1\_deq4iex.json (ah-ah)

(OOV\_comment\_begin) Here something that is not a maybe : Women are not as aggressive about getting pay increases as men. Women are not as willing to enter into a conflict with superiors that are men which result in lower career OOV A recent study showed that in blinded competition , women did worse against men if they are told that their opponent is a man otherwise they performed OOV It also showed that men were less willing to concede a loss if they are told their opponent was a women. Multiple studies have shown that both men and women will score something a man does higher than something a women does , all things being equal and if they are aware of the OOV When blinded this difference goes away. That is why orchestras now do blind auditions , because even being aware of the bias is not enough to overcome it .

(OOV\_comment\_begin) “ a recent study ” ” multiple studies ” love your sources , dude

(OOV\_comment\_begin) Here 's some : https : OOV ? OOV http : OOV http : OOV http : OOV http : OOV

### 115\_ah\_t1\_cxx6thw.json (ah-ah)

(OOV\_comment\_begin) Wealth is not taken into consideration in the first place. The common app does not ask for income or household wealth anywhere .

(OOV\_comment\_begin) they do indirectly , for example , the school knows about scholarship requests and loan applications and such .

(OOV\_comment\_begin) Then what about white household wealth ?

### 454\_ah\_t1\_dlcamzx.json (ah-ah)

(OOV\_comment\_begin) OOV By saying that those people show overwhelmingly the sings of mental disease or otherwise similar problem does in no way put blame on those people. On the contrary mental disease is horrible thing that strikes more or less randomly based on your genetics and random factors that are far beyond your control. I can not place blame on people , because it 's not their OOV The fact that you think I do , says something about how you think about the mental health issue ? You really think it 's the people 's fault for how they feel ? I 'm not saying that you can not ever think rationally and want to kill yourself. What I 'm saying that on average more than 90 % of cases where people want to kill themselves. The people show a signs of mental OOV or some other similarly serious problem .

(OOV\_comment\_begin) What ? Sorry , let me quote you again : OOV How is that not putting the [ blame ] ( https : OOV ? OOV & OOV & OOV & OOV & OOV ) on the individual for how they feel ? You 're saying it 's due to their biology , you 're saying 90 % of cases people are not thinking rationally when wanting to kill themselves. You 're saying these 90 % are mentally ill and so are n't capable of making their own decisions - you 're placing the blame of this unwanted mental state solely on the individual - that it occurs solely in the head , as if there are no other factors not least their environment. I do n't know why you 're trying to twist it and make out I 'm condemning a demographic , all I can assume from that is that you 're trying to upend me as opposed to establish truth. And where you got the 90 % figure from , or how you even go about defining mentally ill. Some governments will call all dissidents mentally ill , so maybe you 're going by a similar OOV I 've had conversations with plenty of depressed people and also had many depressed , OOV friends over the years and know that a large part of their “ illness ” is due to external factors , and their depressive response was something you 'd expect from a rational , sane and emphatic person. Conversely I 've known a few manipulative OOV and these are the ones who appear to be most functioning and normal in society , as well as the most deluded when confronted with objective truth. But by your logic , neither of these demographics are affected by their surroundings , and the depression or whatever else you want to define as mental illness is an isolated phenomenon that has nothing to do with how they 're treated , or how they treat others in day to day life. OOV What about soldiers fighting a war ? Are they mentally ill for wanting to kill people ? Oh context has changed , it 's ok in this case , in fact hail them as heroes ! See how the state defines what 's ill and what 's not ? Finally if you live 30 - 40 years of suffering , how is it not sane or rational to

assume that the next 30 - 40 will either be the same or worse , so make the decision to end it early ? If the film sucks , is n't it rational to walk out halfway through ? If you 're in a casino and you lose half your money on fixed odds , are you seriously going to stay and gamble the rest , knowing the game wo n't change and you 're on a losing ship ? But we live in a society that says “ walking out = irrational , insane , mentally ill ” , which is also the flawed stance you 've taken here .

(OOV\_comment\_begin) OOV Okay , you OOV When I 'm saying mentally ill. I do n't mean hardcore crazy. Nor I mean the hardcore significant life altering problems such as bipolar , or schizophrenia or OOV Even those if people get these ones , the chances of them trying to OOV suicides goes up OOV I mean everything from anxiety , depression or even extremely heightened mood swings due to their OOV OOV These are extremely loaded words. And pretty much OOV the whole point about the problematic and how people OOV A person might be perfectly rational in 90 % of their life. But when it comes to “ insert one area of life ( social interactions , dealing with stress , long term planning , dealing with insults , etc ... ) ” they can absolutely become incapable to make decisions in a healthy and productive OOV Decisions which are flawed and illogical , often destructive and counter OOV Hell a “ normal ” person without any dominant mental health issues , starts to have problems with reasoning , or anger , or decision making in heightened emotional states. OOV Again , you OOV I don't. People in 99 % do n't have a control over their OOV Especially concerning mental health. It is absolutely OOV You wo n't choose your genetics , you wo n't choose the hardship in your life that trigger various negative reactions in your OOV You can not choose how you feel towards something. But OOV This is absolutely OOV Let 's say I blame every single person. Nothing changes one bit. It 's still an issue. This is just a red herring from you , trying to attack completely irrelevant part of OOV OOV Lol , you are doing the twisting of the words. I repeatedly state I do n't place blame on the OOV I do n't even place blame on the government or the doctors for that matter. World is n't so easy that we can find the culprit and place the entirety of blame on them. No , it 's just something that happens in a world that you or others have very little control over. OOV Well OOV It is often said that Madness is rational response of a brain to impossible situation. Brain protects itself in various ways. And it indeed has a distinct logic in OOV However the fact that it has a distinct logic to minimize OOV And to help the brain to cope with real world in various ways does not mean the person has a normal and rational OOV In fact they often go in opposite OOV In case there is a OOV about the meaning of mental OOV [ This ] ( https : OOV ) is what I mean. As per the OOV classifications of the psychiatric society. OOV Wait what ? No. The entire premise of my arguments hangs on how the environment affects the person. And I have no idea where you got that depression causes you to be OOV or OOV What ? OOV What are you talking about ? We are talking about the rational / irrational OOV Which is defined as any form of behaviour that goes against a normal response to situation or any behaviour that does n't follow the normal course of action expected of a situation and usually for no specific or reasonable cause or reason. By normal we mean average for that group of people. You know , as per the psychiatric OOV What I 'm saying is that people showing signs of this behaviour should n't be turned blind eye to , or even actively helped or encouraged to end their lives. OOV You know what ? I entirely agree with you. Hell in this case I do n't even really care about their rationality after that long time of OOV Maybe the people have a mental disorder , but the treatment is much worse for them. Or the treatment does n't work makes things worse. HOWEVER that is not the average person who wants to commit OOV In fact you paint a very small minority of people for who it OOV Does n't mean it 's not worth OOV I would absolutely be in support of a way that would allow people to die with OOV After an psychiatric evaluation and at least an attempt to treat or otherwise undress the underlying problem. If there is OOV Rather than hanging themselves in closet for their family to find them. But these cases are dwarfed by much bigger part of the population. Where some 90 % + of people who try to commit suicide have a treatable mental disorder .

595\_ah\_t1.d78n35e.json (ah-ah)

(OOV\_comment\_begin) You do what 's best for the OOV If there 's no father figure in his life , then so be it. But if you 've been raising a kid for 10 years and expect to skip town to punish your wife 's infidelity from 10 years ago , that 's fucked up. The kid would lose his father : figuratively , literally , and OOV OOV parents OOV toss their children aside or use them against the other parent like pawns in a chess game , but they are human OOV I would rather the law secure the rights and needs of the child , holding it at a higher priority than the surrogate father 's luxury bucks .

(OOV\_comment\_begin) It 's not fucked up at all. Again , if this was a dog , or no child involved , someone leaving would be expected and in many states infidelity equals no OOV However , you 're putting this 10 year label on it. What if it 's six months ? Also , what if I do n't see myself as this kids father ? Again and again your argument is simply “ But think of the kids. ” You literally have nothing else. You are 100 % saying it 's okay to lie and cheat and wrong a person to fuck HIM out of his “ luxury ” OOV As stated by another OOV the rates of suicide , depression , anxiety , mental anguish , bankruptcy etc. all skyrocket for men paying for their own kids. Now imagine that person is paying for a kid that 's not even OOV I used the example of kids with no dads to show that kids can be raised in single parent homes OOV When there 's no chance of money you do n't care af do n't have a solution. Literally you said “ So be it ” but if there 's some poor OOV you can weasel money out of , well fuck him , that kid needs cash ! ! ! You 're ridiculous , your argument is bad , and you should feel bad .

(OOV\_comment\_begin) Dogs are not children. Kids tend to live a bit longer and ca n't subsist on OOV If it 's only been 6 months because mom and fake dad conceived after a one night stand , then I have a hard time picturing a woman who would doggedly pursue the man with legal action for child support. That kind of woman does n't really exist in my world. It sounds like a OOV I do n't believe it happens at the rate people seem to fear it happens at. It 's an OOV problem that taps deeply into male OOV If infidelity were discovered immediately , the fake dad would probably get off the hook , and the real dad would get hit with child support. This is the normal way things work. The only time a fake dad would be hit with payments is if he had already been acting as a real dad for some time. I threw out the number 10 years. Long before even that , the kid has developed an emotional connection , the parent has been making good on providing , and it 's in the kid 's best interest that this OOV Here 's what IS a problem : kids growing up without the presence of parental OOV Single parent , single income situations lead to moms and dads at work all day instead of caring , teaching , and OOV Money wo n't fix everything but it OOV The societal good far outweighs the negative of forcing the fake dad to continue OOV Note : I use “ fake dad ” somewhat OOV The OOV father is still a father if he 's been acting that way. He 's a real father. Unless you think adoptive parents are somehow OOV or should be ridiculed as OOV , then I fail to see the difference .

### 1117\_ah\_t1\_d02r5f8.json (ah-ah)

(OOV\_comment\_begin) And a OOV OOV is not a cost factor ? All I 'm saying by linking that Wikipedia article is that your anecdote is not equivalent of most people OOV Building an entertaining center ( not from scratch but a room with all the components ) could cost the same or more for a person as acquiring a desk and a OOV At this point , furniture introduces many more variables that will vary further from people to people , so we should abstain from it. It is easier to look at prices when we focus on hardware and not any extras they might have to OOV You also need to stop generalizing everyone that talks positively about PCs into a “ OOV ” You 're in a thread that debates consoles prices vs pc prices , and some of the arguments will sound like OOV It just makes your point that much weaker when you 're calling names .

(OOV\_comment\_begin) You 're circle jerking console vs pc when that was n't the point of the post. This is exactly what you said “ Lol , this is no longer about PC vs consoles but about OOV ” . And that 's where me saying your OOV PC came from .

(OOV\_comment\_begin) Rule 3 ” Refrain from accusing OP or anyone else of being unwilling to change their view .

### 318\_ah\_t1\_cytpz6n.json (ah-ah)

(OOV\_comment\_begin) There 's an expression , “ Never attribute to malice that which can be explained by OOV ” Not a perfect fit for this situation , but when choosing between him being an extremely savvy , cunning manipulator running the biggest con of all time , and him being a rich , delusional OOV , I say you go for the simpler explanation .

(OOV\_comment\_begin) Get OOV some more you fucking OOV I bet you OOV OOV Sanders

(OOV\_comment\_begin) [ removed ]

### 136\_ah\_t1\_czcux3g.json (ah-ah)

(OOV\_comment\_begin) OOV I disagree that an ideal free market , implemented using OOV humans , will lead to an ideal OOV We are seeing more and more de-facto monopolies , market failures which are not addressed by government due to [ regulatory capture ] ( https : OOV ) , a concentration of wealth at the top ( and OOV of work , which may be cheap but implies people are treated as commodities ) , partial transition from democracy to oligarchy ( [ Citizens United ] ( https : OOV ) ) , etc. I argue that if you account for the failures of people - both as individuals and groups , the a stronger governmental stewardship , and greater societal mutual support , as in the theoretical ideal of the social democracy , will lead to a better outcome .

(OOV\_comment\_begin) OOV This logic makes no sense to me. If we are operating on the idea that individuals and groups are prone to failure , then how can it possibly be the best course of action to concentrate power ... with a group of those individuals ? Not just any group either. A group with power that can be bought and corrupted .

(OOV\_comment\_begin) OOV Some concentration of power is OOV But in a functioning democracy , there is far greater transparency and oversight over political power than there is over private OOV The Koch brothers have zero accountability , no real oversight , and no way of replacing them. Politicians get replaced every decade or so ( at least in functioning democracies , which excludes the US given its extreme OOV and Citizens United ) . There are requirements of transparency , and multiple layers of oversight , including but not limited to , the people replacing them. And in quite a few countries a lot of the politicians are actually out to do well. Because in many countries politicians are not a subgroup of OOV If corporations were people , they would be classified as sociopaths - not caring about anything except OOV Corporations do not need to be bought or corrupted , because they are worst-case by design. They do n't care about citizen 's well-being , only the next quarterly OOV Look at many countries in Europe. Germany for example.

4 weeks paid vacation minimum , healthcare and higher education virtually free at the point of OOV A working democracy. Good social services. [ Better social mobility than the US ] ( https : OOV # OOV : OOV ) ( [ source ] ( https : OOV ) ) . I 'm sorry , but your theoretical arguments break in the real world. Social democracies work better .

### 1069\_ah\_t1\_dkhyzzy.json (ah-ah)

(OOV\_comment\_begin) OOV Okay I 'm going to say that qualifies as being terrible and OOV It does n't stop being terrible and immoral because it 's common or because it 's part of OOV That one single person in this exceedingly wealthy society is anywhere near to poverty is immoral and OOV OOV Yes. Workers are exploited in a capitalist economy. There is no way around it. Your boss steals the value of your labour in the form of profit and returns to you nothing but the opportunity to make them more profit .

(OOV\_comment\_begin) OOV My friend spent over OOV dollars on cocaine in a relatively short time and is now living in a single bedroom apartment working a minimum wage job after getting out of OOV Is it immoral and terrible that he now has to face the consequences of his actions ? My sister bought a new car a while back , she has asked me for loans every month to help with her kids because she ca n't keep up with the payments on her OOV Should mindless spending and no budgeting result in no negative things happening to you ? Should we get everything we want without effort ? Should society enable such behaviors ? OOV Existence is OOV That is what existence means for a being living on planet earth. There is no being in existence that lives for free , apart from some humans who have benefited enough from this “ capitalist economy ” to support their children in such a way and some dictators , but even they need to work somewhat for their OOV No living being on earth can sit down and do nothing at all and OOV We need food , we need shelter , we need people. Is the hospital “ exploiting ” me when I go there for life saving surgery ? They are technically torturing me , even if it means my survival and requires my OOV Could you explain the fundamental difference between this example and your capitalism example ? OOV Except for a wage that you agree to beforehand and have the ability to negotiate to get a larger share of the profits you provide to them. Tell me , if you created a company ( perhaps its better to say factory for the OOV out there ) and somebody came up to you and offered to work at your factory but they kept all the profits from their OOV Are they not now exploiting you ? You built this place , you laid the OOV This is your house , why should they benefit from your work and you get nothing in return ? To offer another example a local hairdresser rents out booths ( “ chairs ” ) to other OOV Should she give them away to avoid “ exploiting ” the people who willingly pay her ? Should she just let them set up shop in her house without compensating her ? Is she not now the one being exploited ? Capitalism works because it is the most fair system we have created in a fundamentally unfair OOV Much like democracy. And it



works because just like my employer uses me , I use them. Everybody benefits from the arrangement , I could n't provide the worth I do for them on my own and they could n't provide the worth I do without me. Everybody OOV The universe is fundamentally OOV children are born every day with less than a year to live , people get horrible painful diseases , people get hurt every day by others and nature. To paint the negatives of existence itself as a property of capitalism is pathetic , and you people need to stop doing it .

(OOV\_comment\_begin) OOV Did he not serve his time in jail ? What more consequences should he face ? Now I 'm not saying that we should give this person 100k , but there should be assistance to provide for all basic necessities so he should never be OOV A life of poverty is a cruel and unjust punishment for any crime. OOV We should have all our basic needs OOV She should n't starve because she made a bad decision. Our society is not some primal wasteland , we have to expect more of ourselves than the law of the OOV If she ca n't pay her debts then she wo n't get more credit and wo n't be able to OOV herself OOV She may not qualify for a home loan or a future car loan or a credit card. But she should never want for a safe place to sleep , food to eat , or essential OOV OOV It need not be. We can be better. OOV We are nearing a time where no humans will need to work. Automation will replace all human OOV But until we get there we live in a time where no one should perform a job that does n't fulfill them. There is no need for this. Beyond that we should not live in a society driven by profit OOV If the workers , rather than a lazy capitalist at the top , owned their work places it would be immeasurably less OOV OOV Soon we will. Until then we should transition to a more socialist economic model to reduce exploitation and improve quality of life. OOV In America yes the hospital is exploiting you by charging you unnecessarily massive fees and deriving profit from your essential medical treatment. No profit should ever be extracted from anything , but most especially essential services. If you were treated in a non-profit hospital in a country where the cost is subsidized by society at large there would be no exploitation there. You can argue 'they are technically torturing you ' but you provided informed consent so it is not unethical , in this society where the cost is subsidized and the hospital is OOV In America you do not have this OOV OOV In OOV employee negotiations the employer holds all the power. You will die without a job , there is a small number of possible employers , and you are not negotiating OOV You are negotiating against every other prospective OOV This is why collective bargaining is essential , the workers sit together rather than against one another. OOV No. They are asking for a fair wage , that is to say they are asking to be paid the value they OOV The mindset that profit is acceptable makes this hard to understand , I 'll OOV OOV They are performing the work. You are not. They are producing the value. You are operating a building that allows them to do so. It is reasonable for your costs to be covered from the value of the labour , that is n't OOV It 's reasonable for a wage equal to that of your median labourer to be paid to you , that is n't OOV But when value is taken from the worker and given to the owner that is OOV An owner is not more OOV than a OOV Most of the time they 're worth far less to the company , they do n't add any value. OOV First , again , having her cost covered and paying a modest living wage is OOV But often the owner will extract nearly 50 % from the stylists , clearly that is OOV No one deserves to accumulate wealth off of the labour of another. However , and mind you , if she owns the salon she is under no obligation to bring in other OOV If she wanted to she could do the work herself in which case she would be entitled to keep the entirety of the product of her own OOV No one forces her to hire stylists , she will not starve if she does n't hire stylists , the relationship is not the same. Business owners hold all the power in these OOV OOV Capitalism is less fair than social democracy , less fair than socialism , less fair than OOV It is not the most OOV Capitalism is the system that we have in place for the same reason the OOV was in place before it. It 's the system chosen by the people who already had the power , and it has reinforced their power well enough that we have n't been able to change it yet. Capitalism is inherently OOV The profit motive is inherently OOV Explain to me how it is more fair that one man sits in a 20 million \$ penthouse selling his drug for \$ 500 a dose when it costs him 1.66 to OOV Explain to me how it is more fair that millions go into poverty before dying , or billions already in poverty are denied essential life saving medicine so that one man can be a OOV Explain to me how that is more fair than having all of those people be healthy , have the medicine they need , have the food they need , and have a modest home that suits all their needs. OOV I do n't benefit from my employer stealing profit from my OOV I do n't have the option to choose an employer that does n't steal profit from my labour , other than death. The relationship is inherently coercive and it does me no good. OOV And every day millions of people work to fix all of those conditions such that suffering can be OOV They do n't just accept it and say there 's nothing that can be done. Capitalism causes unique suffering that the alternatives to it do not. We should work to eliminate that unique suffering to create a better world .

#### 1114\_ah\_t1\_delxf3h.json (ah-ah)

(OOV\_comment\_begin) We have to take at face value that you are n't OOV Prove to me that you are n't trans .

(OOV\_comment\_begin) Could he simply show you his driver 's license and penis ?

(OOV\_comment\_begin) That 's his sex , not his gender OOV Trans men can get their gender marker changed and get OOV .



(OOV\_comment\_begin) OOV ; dr OOV and imperialism made most forms of appropriating western culture more accurately labeled as OOV ( Like OOV , adaptation or marginalization from the middle school civics textbook ) . Not to mention that OP using the phrase “ Westerners ” makes this view blatantly wrong because First Nations people and Mexicans are just as “ western ” as any other OOV , and cultural appropriation claims from them are always considered valid from people that take appropriation OOV In addition to that , I ’m glad OP used Christmas as an example ’cause it goes quite well in favor of an explanation that I like to OOV The centuries of colonization the West engaged in left a lasting mark on the world. These other cultures did n’t necessarily “ appropriate ” western practices , as much as they were forced to assimilate or be imprisoned or OOV One way those demands affect the world now is that when non Christians who celebrate are asked why , responses range from “ my family has always done this ” to “ is this how you celebrate Christmas ? ? ? ? I ’m just eating food with my family now that everyone is off work ... ” In reality , Christians worked very hard to appropriate pagan practices that had nothing to do with Christianity ( ie the Easter bunny , and celebrating the birth of Christ in the dead of winter ) to appeal to the most people and get OOV Barring that they murdered people into OOV Centuries of “ Do as we say , AND as we do OR we ’re burning this town to the ground. ” weakens the West ’s argument for being slighted by other ’s doing things traditionally OOV If more modern reasoning would be better , and using just America as an example is okay , then I would like you to consider the media ’s portrayal of OOV OOV outrage every Christmas rolls around. Schools choosing to put on “ holiday event ” instead of Christmas events or companies choosing to say “ happy holidays ” or be nondescript about it at all , they receive negative press or coverage from outlets reporting the outcry against the “ War on Christmas ” . I very intentionally qualified that example with “ media portrayal ” cause I ’m a Christian and these things do n’t matter to me at all , and I ’ve talked to my conservative Christian friends and they also believe that it ’s complete nonsense but I also acknowledge the bias there , in that I would n’t be friends with the kind of people that work themselves into a OOV over that , but media coverage uniformly reports that this is a thing that conservatives are upset about. So a person that is n’t Christian would be more inclined to just say merry christmas , or bless you after you sneeze , or “ I went home for Easter ” rather than deal with any blowback they may perceive that they will receive or because it ’s just straight up second nature because of how ubiquitous and dominant these western practices are. Another conversation people have is against white people appropriating black hair OOV Ignoring the fact that black people can be born with blonde hair , straight hair , etc. irrespective of OOV , there were laws against black women wearing their hair naturally , requiring them to be covered , things of that nature , 100 or so years ago , it is currently statistically worse to wear natural hair if you are trying to be employed , and there are black children right now being asked to leave school or get suspended for wearing their natural hair too long , or in braids or OOV For this reason black people wearing western hairstyles would not be seen as appropriation but , at worst , assimilation and at best absolutely nothing at all. When we look at the reverse it gets to the heart of why I think appropriation is a problem. Its the core reason as to why you do n’t hear many Germans or German Americans up in arms about people celebrating Oktoberfest or why Mexicans on Mexico could give not give less of a shit about us eating candy skulls on Day of the OOV Americans ( or American Imperialism , the American Power Structure , Deep Government , Mass Media , whatever I need to say to imply this is the “ they ” that ’s using an invisible hand to define how Americans view things and then disperse that information ) will criticize these minority groups for their hair , their accents , or say they have n’t tried or done enough to be real americans , and elect a president that wants to build a wall between them and their home , and then turn around and see Americans ( TM ) wearing dreads , drinking loaded OOV , and painting skulls on their face for Instagram and tumblr , and praise them for being worldly , or trendy or OOV The group that these cultural traditions feel pain. Its akin to you making food for yourself , sharing it with someone and then them they look you straight in the eye and tell you “ Your cooking is SHIT ” while continuing to scarf down that OOV To watch others participate in your heritage but fear joining in because it may then call into question how well you ’ve ACTUALLY assimilated or people will take it as an invitation to make “ jokes ” or call themselves “ honorary OOV OOV ” , its enough to make people salty enough to say

“ OOV OOV OOV OOV ” when in any other context , they may have loved to have someone help them tie on their OOV or try some of that sweet , sweet , soup OOV while people still living in the homeland do n’t understand what the problem is and love the tourist devour the culture ( and spending tons of money ) and why westerners do n’t really feel aggressive watching others ... Play rugby or watch the Indiana 500 or whatever. This took me forever to type out. I am OOV Remember me as I was. A dank meme .

(OOV\_comment\_begin) Calling Native Americans “ Westerners ” ( at least , the OOV ones ) is extremely ridiculous , and could only come about through misunderstanding the term OOV It ’s not about where you are globally ( that does n’t even make sense , as Earth has no absolute East or West ) but rather , about where you belong on a closely related set of OOV If something can be traced back to Greece , or a culture descended from the Greeks , it ’s OOV It is obvious , then , how impossible it is for American Indians to have been Western civilizations .

(OOV\_comment\_begin) I agree that if we define Western in the very specific , useless , and agenda driven way you ’ve defined it , then First Nationals would n’t be considered OOV I also agree that since the Earth is basically a sphere , it has no true east or OOV However I have no reason to accept your definition of western over mine , so First Nationals are OOV And though the Earth is basically a sphere , maps are flat , and are clearly split in OOV centered maps East and OOV In addition to that , since there is a place labeled “ The Middle East ” , we can assume that there are generally accepted East and West OOV If we consider America a western country then we got ta include mexico , and that includes their indigenous people , and if we include Mexico ’s indigenous people then we got ta include First Nations people too. Therefore First Nationals are Westerners .

#### 1249\_ah\_t1\_d09rs5v.json (ah-ah)

(OOV\_comment\_begin) The purpose of marriage is to unite and establish a family unit and to have new children , OOV is n’t an established family unit and adoption does n’t really add more citizens it only shuffles about the current OOV The government should not recognize and afford benefits to homosexuals on two OOV Firstly they have not been denied anything so the 14th amendment is irrelevant and secondly because they can not have more children and thus allowing tax benefits onto them as they will not have new children to prop up the economy and will not benefit the society with more children. That is also why I support removing benefits for those who do n’t have above replacement rates amount of children or are not planning on such things , the benefits of the marriage should only be upon those who have or had wanted to but were rendered incapable due to exterior means. Yes , people do n’t vote on ideas they vote on people we shifted a long time ago from that friend .

(OOV\_comment\_begin) OOV Even assuming your narrowly tailored axiom about what constitutes the “ purpose ” of marriage were true ( it is n’t ) , gay people can still have kids by proxy , and then raise them themselves. Still fulfils all of your requirements .

(OOV\_comment\_begin) Proxy is not the majority , unless ever fag has 3+ children it is n’t OOV Yes it is , marriage in the sense of the state exists to further the nation not the silly idea about love .

#### 786\_ah\_t1\_dloheid.json (ah-ah)

(OOV\_comment\_begin) You can OOV You can express yourself. I do n’t have to give you stage to do any of those things. I do n’t have to help you spread your ideas. I do n’t have to spend millions making my brand , so you can destroy it. If you come to my house and take a shit on the cat , I do n’t have to be forced to open the door ever time you knock .

(OOV\_comment\_begin) All of this applies to gays and bakers

(OOV\_comment\_begin) When you examine the related case law and the arguments made you find that in those two situations different arguments are being made .

### 802\_ah\_t1\_d7azjns.json (ah-ah)

(OOV\_comment\_begin) I am broadcasting my own plans on OOV Broadcasting them on OOV forums is not possible. OOV , Do n't change your view , I plan to illegally immigrate precisely for this reason. See my previous post on this OOV I hope I can get others to join me .

(OOV\_comment\_begin) Haha people like you OOV to be working for Trump to stir people up .

(OOV\_comment\_begin) Fuck Trump , there is nothing in his policies that would affect me one way or the other. He is barking up the wrong tree. That said , it might be better if there is an OOV like Trump in charge so that the entire OOV is laid bare for all to see. I 'm sure it will be easier to stir up a movement in that case .

### 1015\_ah\_t1\_dmzd2ww.json (ah-ah)

(OOV\_comment\_begin) Examples ?

(OOV\_comment\_begin) Scroll through the comments , there are numerous examples below and on every best of thread this bullshit gets OOV Edit for these idiots : Read , it 's in every thread this has been posted down in the comments , hell even people here have given examples or just read the bill , everyone has shit that is questionable .

(OOV\_comment\_begin) I scrolled through the comments of this thread 's post , but they all pretty much just say what you had said , again with with no OOV I apologize if I missed any as I am reading on my phone but I 'm fairly certain I saw them all .

### 230\_ah\_t1\_d03ctwq.json (ah-ah)

(OOV\_comment\_begin) There is zero advantage to having tattoos done as a child rather than as an OOV There are two strong disadvantages to doing the tattooing super early : tattoos are a symbol of self-expression in our culture , and the design will become distorted as the child OOV Most tattooing is not mutilation , but it is illegal to tattoo a child in certain states and legal in others. In contrast , people who want to be circumcised do n't want fancy OOV So there is no disadvantage to doing it early other than the possibility that your child might end up not wanting to be OOV And there are strong advantages to doing it early : less risk and better OOV The advantage of waiting to see if the child actually wants to be circumcised may outweigh these advantages of doing it early , depending on the percent chance your child will actually want to be OOV Either way it is not OOV It is an equally valid penis OOV The word " mutilation " is a value judgment that implies one configuration is worse than the other. Most people with circumcised or uncircumcised penises love their penises .

(OOV\_comment\_begin) It is n't OOV It is male genital OOV You were mutilated at birth and you ca n't deal with the OOV Your brain was OOV and now its all a little hazy for you. Brian Morris is probably on your mailing list. Show a mutilation procedure on the news .

(OOV\_comment\_begin) Who is Brian Morris ?

### 213\_ah\_t1\_crf2xli.json (ah-ah)

(OOV\_comment\_begin) We are often told today that Islam is incomparable with democracy ; this is the other side of the early 20th century coin which reads " Jews are evil " . That bigotry led to one of the greatest crimes in history. We should be very sure that our new bigotry on OOV 's reverse face does not lead to the same thing. It has that OOV This is why I am very , very scared of OOV In my view , lying is the root of all evil. Perhaps you are not lying , but you have been lied to. Islam has virtually never been violent , indeed it has almost

never even been OOV Look at the 17th century ; in Europe , Christians are tearing each other apart in the greater religious war in history. Where do the persecuted Jews flee for safety ? The tolerant , peaceful Middle OOV There was not one single internal conflict in the Islamic world until the First World War ( aside from the borders ; the Ottoman Empire was still an Empire after all ) . So it 's silly to say that Islam is a violent religion. It 's not remotely backed up by history. You 'd have a hell of a lot more grounds for saying Christianity is a violent religion ; indeed , Christianity has been an extremely violent , political belief everywhere it OOV Political Islam , by contrast , is about 30 years old. In Afghanistan , for instance , the public turned to communism as their natural politics , not OOV Popular communism continued until it was overthrown by the OOV Taliban in about OOV Something has CHANGED since the 17th century , around about OOV Now what could that be ?

(OOV\_comment\_begin) OOV I literally just need to read a book about Constantinople to throw that away as folly .

(OOV\_comment\_begin) Oh , the Byzantine Empire , an explicitly Christian , exceptionally violent society ?

### 238\_ah\_t1.ctbgeci.json (ah-ah)

(OOV\_comment\_begin) It 'll go down in the history books I 'm sure. You 're definitely the big man with your snide remarks and poor argumentation skills. Big ups , pal .

(OOV\_comment\_begin) It 's a shame because up until the point that you became nasty , I had enjoyed discussing with you. There is nothing wrong with acknowledging that a discussion has reached an impasse , but there is no reason to get OOV It marred what had otherwise been an OOV and enjoyable discussion .

(OOV\_comment\_begin) I got nasty ? Did you read what you posted ? The derision was immediately OOV Your tone leads to people disliking you , and your OOV dislike of direct responses to arguments only makes matters worse .

## 2 False positives (Type I error) (delta as AH) 53

### 725\_delta\_t1.d9vv81j.json (delta-ah)

(OOV\_comment\_begin) OOV We have similar things in the US , and they 're the result of past discrimination of these same groups. In the US , blacks have been actively discriminated against for essentially the entire time our country has existed , and affirmative action policies are meant to even the playing field a bit for these groups that , as a whole , lag behind in OOV OOV There 's always a debate about whether or not it 's good or bad , but no one really has the answer here. OOV Generally speaking , in most countries , these are the ideas of OOV The right wing groups generally want worker 's rights limited and organized labor limited , so if this is something you 're in favor of , you probably actually have a leftist to thank for them. OOV So why has n't this happened in Scandinavia or most of the rest of Western Europe ? You 're always going to have people take every break they can in order to limit their tax liability , but increasing taxes on the mega rich does n't mean they 're going to leave. All this is is a case for better tax enforcement and tougher offshore laws. It does n't mean the premise is wrong .

(OOV\_comment\_begin) OOV Not all blacks are poor and , even then , they 'd need the quota for being OOV Would they have a OOV against an otherwise similar white person ? OOV Because of the culture .

(OOV\_comment\_begin) OOV In the US , OOV There was a [ study done in 2003 ] ( http : OOV ) that submitted the exact same resumes to companies , the only difference being the OOV One resume had a traditionally " white " name , and the other had a traditionally " black " name. After about 5000 resume submissions , the " white " resume needed to send 10 resumes to get a callback , while the " black " resume needed to send 15 resumes to get a OOV Again , these resumes were identical except for the name. OOV So is n't that a problem with your society rather than with " leftists " ? The ideas are clearly valid and have been used to much success in other areas of the world .

### 387\_delta\_t1.d17gze6.json (delta-ah)

(OOV\_comment\_begin) I am without a shadow of a doubt that this is an illusion born of toxic internet culture. I know two gay people who have been beaten to unconsciousness because of their sexuality in the last twelve months alone. I

myself have been the victim of pretty horrific OOV My transgendered aunt attempted suicide largely because of the OOV attitudes of the rest of her immediate family. How many people do you know who were almost killed because they were straight ? How many people do you know who tried to kill themselves because their family did n't accept that they were OOV ? A couple people saying dumb things online is OOV by the legitimate , dangerous hatred and discrimination that exists in the real world. I 'm sorry , but the two situations are nowhere near equal , let alone reversed .

(OOV\_comment\_begin) I 'm sorry to hear about the things that have happened to those people you 've known , and I hope they 're doing okay. I am a little confused ; you said that you 've never had to deal with any negative behavior due to your race or OOV If you do n't mind me asking , then what has been the cause of your difficulties and how does that refute my argument ?

(OOV\_comment\_begin) I 'm OOV I have never , not a single time , been accosted for being white , a man , or OOV Ca n't say that OOV my sexuality .

#### 1166\_delta\_t1\_csrd67y.json (delta-ah)

(OOV\_comment\_begin) Blaming yourself ( or taking responsibility for a failure ) is a behavior that can improve yourself , but self-loathing is not. Taking blame or responsibility can drive someone to work harder , learn , and not make the same mistake again. OOV yourself is counter-productive , as it does n't encourage you to improve , and you end up feeling like there 's no point trying to improve , since you 're more focused on beating yourself up than working to fix your faults .

(OOV\_comment\_begin) Well okay , I guess I got mixed up the words , not native English OOV But I 've still heard a lot of talk about how you should n't blame yourself .

(OOV\_comment\_begin) No worries ! I should also add that it 's important to be able to judge who to OOV There are instances where you should take the blame , and some others are to OOV If you blame yourself when you 're not to blame , that 's unhealthy .

#### 185\_delta\_t1\_cgd7j7b.json (delta-ah)

(OOV\_comment\_begin) I agree with you. Nye is n't the right person. But do I think his debate counterproductive ? Heck no. The reason why Nye 's debate was actually a good thing is one key overlooked point in a lot of the discussion surrounding the debate : Nye turned the debate around on Ham and challenged him not just on a science basis , but on a OOV one. If you want to challenge people like these , you OOV to understand where they 're coming from. And these people are n't scientists by any stretch of the imagination they are religious people , who operate under a fundamentally religious OOV By reminding them that there are people who are just as Christian as they are and yet completely in line with science , Nye turned the debate from a scientific one to a theological one which quite frankly , should have been the case from the start .

(OOV\_comment\_begin) That 's a very interesting OOV I 'm glad to have gotten such great responses on this topic !

(OOV\_comment\_begin) No problem , love that it OOV Please let me know if you have any questions .

#### 907\_delta\_t1\_ctsyd4m4.json (delta-ah)

(OOV\_comment\_begin) You should be able to glean the principle from the example OOV Obviously , abortion is not exactly like situation proposed , and we could change the example so that it more closely resembles the situation. Perhaps you attended an enjoyable concert given by that violinist , with the entry fee being an entry into a lottery that might lead to being hooked up to that violinist to treat his kidney OOV Do you have the moral right to change your mind later ? The key idea is the answer to the question : are you morally required to give up your bodily autonomy to secure the life of another ? Even if you believe you are morally required to do so , if you think there are reasonable arguments to the contrary then it 's a women 's rights issue as well- nobody is arguing that the status of personhood of the fetus has no bearing on the issue of OOV We are simply saying that it also happens to be a women 's rights issue .



(OOV\_comment\_begin) Also a women 's rights issue , sure. But that is not the point. It is first a question of whether the fetus is a person. Only by answering that question can there be any OOV Ignoring that question , which both OOV you provided do , ignores a large majority of the population 's concern about the whole OOV Regardless of how it is decided , women 's rights towards it will be decided separately , but will always be based on the answer to that question .

(OOV\_comment\_begin) The hypothetical does not ignore the question of whether a fetus is a OOV it says , “ Okay , let 's assume for the sake of argument that the fetus is the person. Even so , there is still a debate to be had. ” You 're offended that pro-choice arguments seem to avoid discussing the personhood of the OOV But what this example shows is that whether or not the fetus is a person , there is a right to bodily autonomy to be OOV ( If the fetus is not a person , it 's clearly just an issue of bodily OOV and thus pro-choice people will object on the grounds that women have the right to their own sexual choices and OOV ) Your CMV is not “ The personhood of the fetus is a more important qualifier in deciding abortion than women 's rights. ” It was “ abortion is not a women 's rights issue. ” There is a discussion to be had about women 's rights regardless of the personhood of the fetus ( although if we all decide the fetus is not a person , it becomes rather overwhelmingly in favor of pro-choice ) - so in what sense is abortion not a women 's rights issue ?

### 681\_delta\_t1\_cepgeeh.json (delta-ah)

(OOV\_comment\_begin) The only other reason OOV could think OOV Is it possible that you know of people that have given natural childbirth for personal reasons , but who keep it to themselves ? It seems that your problem is n't with natural OOV You problem is with OOV who have OOV OOV have had natural childbirth .

(OOV\_comment\_begin) Oh stop ! Yes , I hate OOV but I 'm not talking about the women who OOV OOV have had natural OOV If a woman OOV OOV have had it , that means she did n't have a choice in the matter , because she asked for the medication too late , or if she could not have the epidural for another reason. No , I 'm talking about the women who OOV did natural childbirth AND go on to brag about it and/or look down upon women who opted for the drugs because they “ could n't handle it ” or are otherwise “ weak . ”

(OOV\_comment\_begin) OOV are the one who titled your CMV “ I think mothers who intentionally gave birth without drugs did it for OOV rights. ” When I point out there could be people who do it for other reasons , you respond with : OOV So now , all of a sudden , there 's an AND in there. So which one is it ?

### 389\_delta\_t1\_cx74eip.json (delta-ah)

(OOV\_comment\_begin) 1 ) that kid is a massive dick 2 ) this sounds like bullying not elitism

(OOV\_comment\_begin) It is bullying , but the thought process stems from elitism , I think this is OOV And yes if you are being a massive dick because you believe you are superior then you are elitist by definition .

(OOV\_comment\_begin) Yea but this kids a dick , do you think he will care about a public apology that some PR person will OOV Here 's my theory on racists and you might prefer this for OOV I want racists to be able to express their views so we all know who the racists are , if you ban racist expression , no body knows who the racist is. a perfect example in my State in Maurice 's BBQ , Maurice had a pretty great business , locations all across the State , he eventually went way over the top about his racist views and the OOV responded , his business is way down , I mean way down. His views ruined a multi-million dollar business without any legislation or public OOV It 's better to know who the racists ( elitists ) are instead of driving them OOV When people step out of line society will respond without need laws to help them

### 197\_delta\_t1\_cpwf39m.json (delta-ah)

(OOV\_comment\_begin) Well , depends on the purpose. For street fighting , OOV and OOV are distinctly inferior to karate and OOV OOV I hope that is enough to satisfy your “ To change my view you would have to show that one style is inherently better at defending yourself ” condition .

(OOV\_comment\_begin) Unless they have something in their hand .

(OOV\_comment\_begin) Like a OOV ? Yeah that comes in handy in street OOV Come on yield the point .

### 678\_delta\_t1\_cmmju6y.json (delta-ah)

(OOV\_comment\_begin) The vitriol is coming from our reaction to your dishonesty regarding what constitutes a reasonable discussion , and from OOV reaction to your apparent ignorance regarding what constitutes allowable OOV Your demand that your view is acceptable because you personally failed to come up with a counterexample is OOV OOV as a reasonable ( in the literal sense ) view to OOV Claims are not true until proven wrong , they are false until proven right.

Showing you that your view is wrong OOV only require pointing out that flaw in your OOV As to the vitriol : you ’ve been shown , multiple times , that your basic premise is OOV , and you have repeatedly tried to save it with special pleading ( i.e. “ OOV ” ) . So give me OOV OOV to think that when I show you OOV OOV widely spread legal profession that is unquestionably immoral , you wo n’t shift the goalposts OOV ? You ’ve already been shown \*that\* you are wrong , and you OOV Now , you need to listen to OOV you are wrong. If you can get that , then your view \*really\* will be changed .

(OOV\_comment\_begin) I ’m just referring to your OOV I ’m not having a problem with any other OOV And I have n’t demanded that anyone accept my view. In fact , I think the point of CMV is the OOV As to changing the goal posts , as I ’ve said a number of times , those goal posts were in the OOV Nothing ’s OOV If your point is that I did n’t explain why I think most widespread and lawful professions are moral in my OP , I take your point. But this was an honest mistake that ’s taken you a long time and a lot of cursing and overheated rhetoric to OOV And in the process you ’ve OOV the OP numerous times , as with your repeated invocation of unlawful OOV If you ’d said calmly at the outset that I should have edited the OP to better articulate my case up front , I would have done so. Edit : OOV One reason is that I ’ve engaged other posters who have posted constructive OOV I also engaged examples that you posted , but you did n’t respond OOV And it would n’t be “ yet another widely spread legal profession that is unquestionably OOV ” I think the only one that ’s close to “ unquestionable immoral ” is executioner , and that ’s a pretty niche OOV But I gave a delta for it .

(OOV\_comment\_begin) The tone of an argument does not affect its OOV And it is n’t about your OOV Your entire view is fundamentally flawed because it is based on a logical OOV It does n’t matter if your “ reasonably widespread ” and “ in a plurality of countries ” OOV were in your original post. They are OOV OOV , put there only so you can talk about how the dragon in OOV garage is n’t visible to infrared OOV They are put there so that you can discount the many unquestionable OOV that have been given , as you already have done. But again , you OOV admitted OOV This means there was a problem in your thought process that allowed you to believe something OOV I ’m telling you what that mistake was : You were OOV OOV in saying “ \*This thing I believe is true because I ca n’t think of why it OOV ” . OOV view you hold that is based on such a faulty premise is equally wrong. THAT is your view that needs changing here .

### 897\_delta\_t1\_cqqpczg.json (delta-ah)

(OOV\_comment\_begin) First of all OOV is a 2.25 % chance of murder , which is ridiculously high. Second of all , you ca n’t count all 266 OOV The only relevant popes are the ones who regularly drive in an open car through crowded OOV It is pretty obvious that famous people should not ride in open convertibles through busy cities in huge OOV For example , no US president would consider making a public appearance in a convertible , even though “ only ” 4 presidents were ever assassinated , and only one while driving in a convertible .

(OOV\_comment\_begin) Ok , you 're right. Sorry for my bad math .

(OOV\_comment\_begin) I am not even sure you want to go down the “ numbers OOV ” How many Popes need to get shot before we would consider the risk “ very real ? ” it 's a silly question. So that brings us back to the original question : What is relevant distinction between Pope taking reasonable precautions against starving to death , and Pope taking reasonable precautions against getting shot ?

#### 144\_delta\_t1\_ciydh2t.json (delta-ah)

(OOV\_comment\_begin) Stop putting words in my mouth. You asked how you could prove a discrimination claim if an employer was n't explicit with their discriminatory practices , I gave you examples .

(OOV\_comment\_begin) And I appreciate the OOV It 's definitely something to think about. I think we 've said everything we need to say , though. Anyone who reads it can come to their own OOV That 's what I believe internet debates are really for .

(OOV\_comment\_begin) So have I changed your view ? You early on made a claim that churches were being forced to or would be forced to marry gay couples which I immediately refuted ( or attempted to refute ) and then you dropped the subject .

#### 203\_delta\_t1\_d4ay2if.json (delta-ah)

(OOV\_comment\_begin) No. There 's no “ sweet spot ” wherein you can legally pirate something. I pirated those games from dusk 'till dawn and I would n't dare say it is n't wrong. Your thought process leads me to believe that you think you can still pirate games if they did n't come out on VC or another OOV of some kind .

(OOV\_comment\_begin) Admittedly , that 's OOV But I suppose this argument is too grey to have a common ground on specific moral limits ... which is why we seem to OOV Is it fundamentally wrong ? OOV But the reason I think there is “ nothing wrong ” is because it is not OOV wrong .

(OOV\_comment\_begin) So you would be fine with this scenario : You create a piece of work and make some money on it. Some years later , some new tech comes into play which sees you able to revive your old work and get a boatload of money from it , as it is literally one million times easier to for consumers to OOV But , oh , what 's this ? People have been pirating your work for the past decade because it was too hard to get legitimately ? Oh , that 's too bad. No more money for you. What happened ? Did those people steal from you ? Before you answer , remember , there is only one right answer .

#### 230\_delta\_t1\_d6z1l3o.json (delta-ah)

(OOV\_comment\_begin) Do you know how crazy expensive it is to adopt a child , on top of the actual costs devoted to raising a kid ? It can cost upwards of [ \$ 40 000 ] ( https : OOV ) depending on the OOV That 's simply not feasible for most people. The benefits are absolutely true , and adoption can be incredibly rewarding , but it 's not a viable option for a great portion of the population. The main argument is definitely cost rather than emotions , and I honestly really doubt that “ child bullying ” is a factor at all that deters people from OOV You also mention adoption taking place before the age of three , but you 're ignoring the large population of kids and teenagers that are waiting to be OOV In fact , OOV are often in so much demand that prospective parents are forced to wait on long waiting lists before they 're able to adopt a baby. Adoption is wonderful and a noble act , but I do n't think it 's quite as simple as you might think .

(OOV\_comment\_begin) The child bullying factor was just thrown in there as a OOV I do n't actually believe it either. I knew the cost was significant but OOV Just looking at it from the outset it sounds like a supply and demand thing. If toddlers are in demand then the cost will OOV However with all the fighting over abortion would n't reducing that make significantly more children become up for adoption .

(OOV\_comment\_begin) I think you 're going off on a tangent , are you trying to change your opinion to now include abortion as well ? That 's a completely different topic you 're talking about .

#### 294\_delta\_t1\_ctu7kuu.json (delta-ah)

(OOV\_comment\_begin) OOV Again , see OOV They have had outright bans of firearms above .38 caliber ( which is not useful for personal defense ) since 1960 , and have also had relatively strong gun control since OOV And yet , it 's OOV In the UK , after the 1997 ban , gun crime OOV over the next six years , before OOV for the next 3 or so , and then finally OOV The gun ban , in and of itself , did n't do much of anything ; it was subsequent OOV measures that took away much of the crime itself. There have also been accusations that the UK government has been deliberately misleading in what statistics they report , and that while shooting deaths are down , overall incidents ( and injuries ) with guns may have OOV In addition , a recent publication from the [ Harvard Journal of Law and Public Policy ] ( http : OOV ) found that , overall , banning firearms would not substantially reduce the rate of murder and OOV In particular , they found that : OOV They also point to trends that show : More uses of guns in defense ( by victims ) than crimes committed with OOV Prison inmates have reported that one of their peak fears to deter them from robbery was OOV or not the victim might be OOV Prison inmates that were most afraid of armed victims were from pro-gun states. Robbery is highest in states with gun ownership OOV Finally , they point to other studies that : OOV Fundamentally , the entire argument that fewer guns reduce crime is flawed , OOV when it comes to the United OOV : OOV OOV

(OOV\_comment\_begin) Going to need to check some sources but you may have changed my view about the impact of gun OOV Seems to be a problem with crime OOV more than the guns itself - the guns just get used because they 're there .

(OOV\_comment\_begin) Not to sound pushy , but I think you can award delta 's even if you 're not OP .

#### 400\_delta\_t1\_dhmfphk.json (delta-ah)

(OOV\_comment\_begin) Since we have no idea how it would work , perhaps try imagining it works exactly how the OP imagined and go from there. Is he right ? Would such a system of time travel be totally worthless ? I think it would still be cool .

(OOV\_comment\_begin) Thank you : D ... my view has OOV But thank you for understanding my thoughts ...

(OOV\_comment\_begin) You 're OOV Did my comment on your original post help at all or did OOV do all the heavy lifting ? ( hint hint )

#### 903\_delta\_t1\_d8rl4e6.json (delta-ah)

(OOV\_comment\_begin) Is your view that OOV do n't think they sound more pleasant ? Or that some other people , like Germans for example , do n't think so ?

(OOV\_comment\_begin) Yes and yes , but a lot of people ( OOV Americans ) seem to think that the Romance languages sound more pleasant to the ears .

(OOV\_comment\_begin) So you 're not arguing that other people ( like the Americans you speak of ) are OOV in saying they sound more pleasant , since that 's completely subjective , they 're just not pleasant to you , and you do n't think you 're alone in that opinion. Is that right ? If so , what could possibly change your view ? It seems like I 'd have to convince you that you 're wrong about what you find pleasant ... Which I do n't think is possible , any more than its possible to convince someone who hates bananas that they 're wrong about that and they actually find them delicious .

#### 978\_delta\_t1\_dfnp14r.json (delta-ah)

(OOV\_comment\_begin) What 's stopping us from just making an AI that learns and decides it 's own ambitions ?

(OOV\_comment\_begin) How would a robot like that even know what ambitions are in the first place ?

(OOV\_comment\_begin) The same way you do. Like I said your brain is just a computer made of OOV There 's no reason a computer made of silicon ca n't think in all of the same ways you can think .

#### 637\_delta\_t1\_cbcw3sl.json (delta-ah)

(OOV\_comment\_begin) By having sex , the women made a choice to possibly become OOV She made the choice to create something that is dependent on her. It is different than a random person needing a OOV It 's just like how it 's illegal to

stop feeding your kids .

(OOV\_comment\_begin) Just because she chose to have sex does n't mean she consented to becoming OOV And what about cases of rape ? OOV What does this have to do with anything ? Once your kids are alive it 's completely different because a fetus can only depend on the mother for life. Kids , while they need someone , can depend on anyone . (OOV\_comment\_begin) That 's like saying you are consenting to driving but not consenting to OOV It 's a risk you take on by default when you engage in the activity. It matters because for pro OOV , the fetus is alive. The fetus needs the mother to OOV We would punish a mother who let a 3 year old die , so why not a fetus ?

### 183\_delta\_t1\_d6h0x11.json (delta-ah)

(OOV\_comment\_begin) Since there are all sorts of odd in between cases , why not label some of them for convenience sake ? (OOV\_comment\_begin) Because I do n't think they can be OOV Because the whole thing is based on biological OOV It 's a bit like imagining a new OOV And I think just saying you 're a manly woman or a womanly man is more than enough . (OOV\_comment\_begin) https : OOV : OOV % E2 % 80 % OOV I mean , we have made lots of new colours , and labelled them. Why should n't we do what we 've done with colours with humans ? Why are biological sexes different ?

### 938\_delta\_t1\_cokdle5.json (delta-ah)

(OOV\_comment\_begin) Short of the perpetrator being " messed up " in a way ( a bad term , but under the influence of something , suffering from a mental condition or something like that ) , no actual examples come to mind , apart from the BDSM safe word thing I mentioned .

(OOV\_comment\_begin) Here 's an example ( fictional ) . I meet a girl at a bar and we flirt and drink and end up at her house. Kissing is OOV OOV happens. Oral performed on her with small OOV OOV initiated and the moans are in time with the OOV But they 're fainter and sometimes it 's more of a no than a OOV And she 's looking away. At first I do n't pick up on it. Then I assume this is just some slightly weird OOV ' she 's OOV Then I OOV Not very OOV Felt a bit OOV I roll onto my back. She rolls the other way. We do n't OOV I want to ask what just happened but it all feels so OOV I ask if she wants me to go and she says she thinks that 's a good idea. The next day she 's telling her friends that I raped her. I guess that 's the kind of thing I 'm thinking of. Is it avoidable with better communication ? Sure , of course. Is it rape ? I do n't think so. But she does .

(OOV\_comment\_begin) OOV Well it would be either a communication issue or she 's not being sincere and did it on purpose. I do understand how rumors on their own can make your life complicated and ruin your OOV That 's a very valid OOV I 'm mostly focusing on the judicial part of it ( since you expressed your distrust in the system ) and the vast majority of those false rumors would n't even make it to court. I think when it comes to actual courts , we should give them a bit more credit in these cases. Some people fall through the cracks on both sides , for sure. Always have , always will. But it 's an exception .

### 1236\_delta\_t1\_d7ep510.json (delta-ah)

(OOV\_comment\_begin) OOV That is the narrative that people say , like things are amazing for OOV forever , it just started to get reasonably OOV It really has more to do with epigenetic , and the nurture from society. Seeing your people slaughtered for fun has a lasting effect on people and will effect the way they act for OOV It is fair to say that blacks in America have been historically ( understatement ) wrongfully discriminated based on their OOV Now they are trying to give advantages to OOV that have been OOV Do you have a problem with this ? OOV There was a purposeful plan to enslave Africans keep them like animals , kill them , make them work , after slavery ended give them no rights. Think about in terms of natural OOV Once Hurricane Katrina hit and destroyed the city , it is going to



take decades till the city is back to what it was. 2016 was when racism to blacks have been stopped , they still need 50 years to slowly OOV BLM ( even though is probably factually wrong ) is helping this process of improvement , feminism ( although factually wrong ) is seeing OOV Eventually you will see asian movement and spanish one too . (OOV\_comment\_begin) OOV OOV I never denied this. I completely understand there has been a history of OOV What I am saying is there is no reason to change the policies of the past because of the wrongs of the future. I have Greek relatives ( although I live in the UK ) . I 'm not OOV to demand OOV from Turkey for oppression by the OOV Nor the Japanese for Korean OOV I perfectly understand that the effects of past oppression still exists in the US and in other countries. However , I do n't see why systematic affirmative action is the fairest solution. I also disagree with the methods of BLM and some feminists , even though their cause does , in my opinion , hold some truth .

(OOV\_comment\_begin) ; What I am saying is there is no reason to change the policies of the OOV ( future ) because of the wrongs of the OOV ( past ) If we agree that doing those negative things to blacks disadvantaged black society OOV educationally , spiritually , we should n't give them advantages for what we took ? They should continue to be disadvantaged , economically ? How do we change this when black people are in the ghetto trying to not get into fights , and think about college instead of survival ? OOV Blacks had been not educated and segregated and discriminated , in turn society has pushed them towards being in poor communities with no way out. How do you change this without positive affirmation ? OOV Nor does Jewish people demand anything from German people. They had closure in that any officers were executed and that there was OOV Hitler was OOV , officers were killed and it was made illegal to do what they did to Jewish people. After slavery ended there was no remorse , there was no closure like the Jewish people had and the horrendous acts were continued even as recent as 90s with the Rodney King OOV OOV I disagree too , however it does help the spirit of women and black people. At the same time society has to make sure that myths be dispelled .

#### 748\_delta\_t1\_clzic7j.json (delta-ah)

(OOV\_comment\_begin) OOV This leads me to believe that you do n't actually have a clear idea of the biology involved , then. OOV Well , I 'm assuming you understand bell curves and were just accidentally unclear here. OOV You do n't seem to understand how hormones affect body OOV The muscle loss can not simply be countered by working out extra hard. Testosterone is a vital hormone for building and maintaining muscle OOV Most transgender women end up with even less testosterone than OOV due to the removal of their androgen producing OOV Their natural steroids are basically gone. And since estrogen promotes fat storage , OOV are more likely to have a worse muscle to fat ratio for their weight class than OOV So , what is this “ physical build of a man ” that carries over through a process of gender transition and hormone therapy ? I still do n't know what you 're talking about .

(OOV\_comment\_begin) After doing a lot of research on this in the past hour , It seems that after a couple years on treatment her muscle mass would hormone levels would be about the same as a normal woman. Though she would still have the skeleton of a man , it would be harder for her to gain and maintain OOV So I no longer suspect an advantage , but this is not due to you being a pompous OOV I just like to be informed and I adjust my OOV according to the evidence. But maybe you should stay of this thread if your intention is to act like a OOV You could have conveyed your points with much more tact and respect .

(OOV\_comment\_begin) OOV The skeleton thing is interesting , too , because her bones OOV be less likely to break but she 'd have less muscle with which to move it around quickly than a OOV in the same weight class. But criticizing your views and pointing out their inaccuracies is being a dick ? Okay .

#### 814\_delta\_t1\_cxfef52.json (delta-ah)

(OOV\_comment\_begin) A lot of ideas are repackaged old ideas , it does n't always mean a lot. For example , Michael Crichton made pretty much [ the same argument ] ( http : OOV ) , that environmentalism was repackaged OOV Turns out he might have been right about repackaged Christianity , but he was wrong about global OOV " No more hunger , no more poverty , no more death " has always been the ultimate goal of moral people. It 's not good evidence that they 're blinded by primal voodoo belief because it can be explained very well by optimism regarding the technology. They are similar because of the omnipotent being thing , but people ( even in the field ) are n't sure an artificial OOV is going to be friendly , even when they 're fairly certain it will show up soon. So quite different from OOV All in all , I 'm perfectly willing to consider that even the smartest minds in the field are being very , very optimistic ( in fact , that 's what I believe ) . But I do n't think a convincing argument that they 're driven by OOV OOV can be made ( as opposed to the planning fallacy , or belief in a fundamental shift in how we program these things , or whatever ) . And even if they were mislead , it would n't mean that they were wrong , they might be hurried along the right path by an old instinct that is coincidentally useful .

(OOV\_comment\_begin) I do n't think that " OOV OOV " and the planning fallacy are mutually OOV My point is that the planning fallacy is at play , and it 's probably having an even greater effect than usual because these ideas have the flavor of ideas that we would really like to be true. OOV [ Nahum 1:2 ] ( http : OOV ) OOV Now let 's take a look at OOV 's OOV : OOV [ And let 's compare ] ( http : OOV ? OOV ) , from " Moments with the Book " : OOV Different language ; same ideas .

(OOV\_comment\_begin) You 're aggregating " people on the internet who think OOV 's OOV is a likely scenario " and " qualified people who believe AGI can happen in the next x years " . I 'm pretty sure they are two different groups. If you 're saying " do n't believe the experts " , then OOV 's OOV has nothing to do with that , because none of the experts have said that they 've even heard of it. If you 're saying " people on the internet talking about OOV 's OOV are like christians " then you might be right , but you 're not saying OOV that applies to Elon Musk , Stephen Hawking , the polls , etc .

#### 1038\_delta\_t1\_cozhx48.json (delta-ah)

(OOV\_comment\_begin) Is n't there a feature that allows you to take a cab and skip the driving sequence ? ? I believe you ca n't skip it in multiplayer , but that seems reasonable .

(OOV\_comment\_begin) What ? How do you access this ? I 've never heard about it .

(OOV\_comment\_begin) http : OOV

#### 881\_delta\_t1\_dhfwq1c.json (delta-ah)

(OOV\_comment\_begin) OOV Clearly they did. That 's why they OOV and at the time it was not considered OOV OOV Good then you owe me a delta .

(OOV\_comment\_begin) Wait wait OOV How does this reconcile with American patriotism ? That 's the missing OOV If you lay this out , I will 100 % give you deltas for days. I 've yet to see a convincing argument for this .

(OOV\_comment\_begin) Because to many who fly the Confederate Flag they see the CSA as an institution that put the states before the OOV They have a patriotic sense of respect for their state that comes before their support of the country as a whole. They did it for a stupid reason but their reasoning still stands .

#### 1119\_delta\_t1\_dh8bfta.json (delta-ah)

(OOV\_comment\_begin) OOV One in six American women will be sexually assaulted in her OOV Seems like a rate of violence worthy of being OOV Seems just as bad as " being beaten for being different . "

(OOV\_comment\_begin) But that 's already OOV I understand that people for some reason do n't take it OOV Which that 's a thing to fight for but you ca n't really decrease that number unless marking it a more serious crime would do it .

(OOV\_comment\_begin) So is beating someone for being different ...

## 62\_delta\_t1\_dhorh6d.json (delta-ah)

(OOV\_comment\_begin) Anyone who admits that will be used by the other side as evidence discrediting the movement as a whole. Anyone who even admits the existence of some people within the movement who are hateful will be used in attacks against the movement as a whole. It would be , “ even OOV so and so admits that some OOV are motivated to join that movement out of OOV ! ” It might be the honest thing to do , but it would unquestionably harm these OOV There ’s no way that seeing the admitting quotes thrown in their respective movements faces for years and years would ever be a positive thing. And there ’s no chance that the opposite movement would ever respond with maturity and a sense of proportion .

(OOV\_comment\_begin) How would it harm the movements ?

(OOV\_comment\_begin) Constant bad press backed up by quotes from the movement. Every time there ’s a protest with a thousand people and three guys throw rocks , that ’s used to attack the entire OOV This would be little different .

## 627\_delta\_t1\_d70zev5.json (delta-ah)

(OOV\_comment\_begin) It is not OOV It is OOV Black ’s are literally OOV Just Google or YouTube “ black police targeted ” and pick any source you deem OOV Official crime figures should do that. Nobody is saying black lives matter more , they are saying they matter OOV the fact that asking for equal treatment seems to equate to asking for special treatment , and offends you , is indicative of how deep and insidious the system has been in convincing you that treating them as OOV is okay. If you would like , and are willing to take a step back from your preconceptions , I can provide you innumerable links to help you understand. But right now , you are letting them block you from seeing a wider picture , it seems - evidenced by the fact you seem to think BLM means black lives matter more , among other things you ’ve said .

(OOV\_comment\_begin) They already get special treatment. They are equal in the eyes of most people. I agree that everyone should be treated equally , but I think its going OOV Another user already provided me with some nice examples and good OOV And Id love to look at some pages and/or statistics if it will help , but I will be looking for other contributing factors in those OOV as there is almost always something left out. and MANY of these “ black rights activists ” or whatever you want to call them , are racist themselves and are trying to get up on everyone else. I know that ’s not the agenda for everyone , some actually do want to make a difference and in a good way. However , many many many are just there to cause problems and now be the “ bully ”

(OOV\_comment\_begin) Let ’s dial it back a second : In this reply you have just said you will look at contributing factors ; what contributing factors did you look for in your “ affirmative action is screwing me ” section of your op ? What about the college education bit ? Regarding links , as I am on a phone , I ’d like to save time by figuring out what I need to link you to first , so : ( These may sound condescending but it is not intentional , I am using an app on my phone so it is a pain to type - ad a result I am being ad brief as I can and not bothering much with wording ) Do you accept that if you are targeted disproportionately for something like stop and search , over time THAT may change your reaction to police ? In other words , saying something like “ black people are more difficult towards police ” is offensive as it almost deliberately ignores the cause of the problem ? If not , I will find OOV Do you accept that generations of psychological abuse through slavery and Jim Crow etc have had a negative impact on the mentality of people living in ghettos etc ? To really over simplify , being taught that blacks do n’t do education has been OOV pushed into the minds of ghetto kids from a young age and for decades making it hard to escape the ghetto ( ever heard a ghetto referred to as “ the trap ” ? ) . Mental OOV If you need links , say. Do you see the correlation between culture and history with regards to the current state of black people in the states ? Again as a quick simplification : history and culture lead us to where we are now - our social values etc. These differ slightly within a nation , a city , a street and so forth due to various factors ( race , wealth etc ) . Capitalist values for example have , over time , made it difficult for many Americans to see any of the positives of socialism , even when some aspects are very clearly OOV Likewise , since slavery , a conscious effort has been made to destroy the black nuclear family and keep them down. Mothers were stripped from their own children to raise white kids. Men were stripped from families leading to the “ baby momma ” issues of today. Lack of two parent family ( especially before recent times ) had a huge negative effect on bringing up well rounded kids , created a downward spiral where broken homes were the norm etc. Lack of access to education and “ white ” jobs meant they became valued less over time and drove blacks away from them making them more vulnerable to bad OOV Etc All of these factors and many more have created the idea that black lives do n’t matter as much. All of these factors and many more have created a situation where all things being equal , it is harder for blacks

to access jobs and education. All of these things have made a situation where black ( men ) are disproportionately stopped , arrested , incarcerated and given longer OOV If not , I will fetch OOV And on an OOV If you are angry at people calling you “ racist ” , can you not see why , with a tell of this history and more , they have every right to be far more offended by not their current situation in America , but your op as well ? Regardless , I ’ve written a fair bit. Tell me which parts you need info on and I will provide when I get to another device. And please excuse how curt this post is - I hate trying to write on a phone .

#### 545\_delta\_t1\_dft2x26.json (delta-ah)

(OOV\_comment\_begin) OOV There is no margin of error when you have exact data. Margin of error is for representative OOV OOV So why are more women working now ? How are they defying their “ biological roles ” ? If women are psychologically predisposed to want to be take up domestic roles , why are so many straying from that ? Could it be that our constructed gender roles are loosening due to recent political trends ( ie feminism ) ? OOV Engineers and teachers with the same exact level of education have a large pay OOV There is certainly plenty of demand for OOV Why does society value the perceived “ masculine ” occupation as more valuable ? OOV I was making an allusion to your statement that “ masculine ” occupations are “ objectively more valuable ” , a statement I clearly disagree with. OOV Borat ’s cousin .

(OOV\_comment\_begin) OOV I do n’t really consider feminism all that recent of a OOV We already live in a feminist society. Feminist ideals are mainstream OOV ( Here , when I talk about feminism I mean the traditional version and not the bat shit crazy internet version by the way. ) And things have corrected now because now that we have been living in an egalitarian society for a few generations now those prior constraints are no longer placed on women. In the 50s it was a much different story. The point is even now that those constraints are not placed on women and all the feminist battles have been won , we are still subjected to this nonsense like “ well its not equal because women do n’t choose to become engineers ” or that “ omg women make 5 % less than men , must be sexism ! ” When in fact these difference are just biological reality at play. A lot of this is because certain groups of people are so entrenched in this personal identity of victimhood that they must constantly find the next boogie man to raise their pitchforks at. Without a OOV paradigm they do n’t know what to do with themselves. That ’s really what ’s happened to the feminist movement which transformed from “ women should have the right to vote and work ” into this perverted caricature of itself now that all those battles have been OOV We see the same thing if we compare what MLK had to say to the BLM movement. It ’s a perversion and actually stands for the opposite of its more righteous OOV These are a groups that clinging to their identity as a victim because they do n’t know life any other way. OOV You ’re making the faulty assumption that all bachelor ’s degrees are of equal difficulty to OOV Once you correct that mistake you ’ll realize they are obviously not the same level of education. An engineering degree is significantly harder to obtain than , for example , a liberal arts OOV Both of those enable you to teach children. Not so much for OOV Now if you are to become a college professor or something of that nature I think you ’ll find that the difficulty level of the education and the corresponding pay is about the same. Full time faculty professors at colleges make on average \$ OOV for example. Realistically , a teacher of small children is a glorified OOV I ’m fully confident a majority of level-headed adults could perform these tasks if they really wanted to. What does their day really amount to ? “ OK kids time to read this picture book ; ok kids 2+2 OOV ; OOV sailed the ocean blue ; yada OOV ” And you believe that someone tasked with those things should make the same as someone designing complex technological systems or designing infrastructure ? It ’s just OOV That ’s not to K-12 teachers are not providing an immense social value. Its just that in a capitalist society we do n’t tend to value unskilled labor unless its involving sales or high risk to one ’s health. OOV You did n’t refute much at all. Watch the video. Tell me which side ’s argument you find more OOV You ’ve wasted enough time talking to me so it seems you ’ve got plenty of time to spare 30 minutes on something that may correct your faulty world view .

(OOV\_comment\_begin) OOV Feminism is a progressive moment , and has always OOV Feminist ideals ca n’t by definition

be mainstream , because they are supposed to challenge mainstream OOV In the 50s , people saw the feminism of the time as “ bat shit crazy ” and thought that Susan B. Anthony was a sensible OOV So when I say recent political trend , I ’m talking about the feminism that began in the 60s in 70s which encouraged women to venture outside of the cult of OOV OOV Clearly they have n’t corrected completely though , as we can see from the statistics which have no OOV OOV Could n’t you have said that 20 years ago though ? What makes OOV exact OOV of disparity the result of genetics while the disparity of 20 years ago was the result of culture ? OOV OOV OOV Is n’t the difficulty of a major completely subjective though ? Especially in entirely different field. I , for example , probably would find engineering harder than you do , as I ’m not very interested in OOV You , on the other hand , seem to struggle with things like social OOV That ’s a very shaky foundation on which to assess the “ value ” of a OOV OOV I did watch the video , when you first sent it. It was thoroughly OOV It also presented no hard data OOV So I did my own research on the “ science ” presented in the video. I found a very solid rebuttal by an esteemed OOV You never responded to this , just complained about how I responded to “ one sentence ” of your OOV So as far as I ’m concerned , I refuted it. Unless you have something else to say about it ? I ’m pretty sure that I have convincingly responded to any “ evidence ” you ’ve presented me with. Let me know if I ’m missing something. P.S. I ’m counting all of the bullets of mine that you skip as little s

#### 742\_delta\_t1\_dez83ma.json (delta-ah)

(OOV\_comment\_begin) OOV That doesn t necessarily OOV It s possible for abortion to be legal , but extremely rare due to high education and OOV So yes , it was not a great example. OOV I would love to have most people share large ethical views such as slavery is wrong or women are people . Both of these views are widely accepted now but not OOV I don t care if people have different tastes ( which are the most delicious food ) . Tastes are preferences , and they rarely affect others. OOV You didn t actually provide any support for this. If everyone agreed abortion is bad or good , how would that prevent society from advancing and advancing towards what ? OOV I think this is more a call to avoid being irrationally invested in our views and for dispassionate debate , rather than an end to debate. The issue is that when people s views are personally harmful to you , it is completely natural to be OOV If someone wants to enslave you , it s reasonable to be upset and that doesn t invalidate slavery is wrong . OOV This only matters if both sides are using the same facts and agree to be OOV I m not sure what facts say slavery is ok other than say , divine command theory .

(OOV\_comment\_begin) I ’ll start with the OOV If everyone had the same view that slavery was good because it kept the economy stable and black people were n’t OOV Would we have had the civil rights movement ? No. People changing their mind changes society. But to jump on that. Who says that we are right ? What if we are just different. There is still OOV There are societies where woman still have 0 rights. You said you would want everyone to agree with you on large ethical views but to many people your view is wrong. The reason we have things like the holocaust is n’t because these people were necessarily evil. They had a different OOV I ’m not arguing about any matter and whether it ’s right or wrong because that goes against my point here. There is a 50/50 chance on every single core value and belief you have that you are wrong and trying to push a false OOV Every single opinion has two sides ( or more ) no matter what and both sides thing they are right for whatever reason. ( This is purposely over the top ) But just as a former slave might say yeah slavery was OOV I might say well I do n’t agree with taxes. 1/4 of my work life is slavery for the government. I hope we can get into this more and I ’m all for saying you changed my view I guess if you could answer this that might help Slavery is n’t coming back to the US anytime soon. Should we try to convince people who are still pro slavery that they are wrong ? To them making it illegal wrong and it was taken away from them. OOV There is still slavery other places so it ’s still OOV And our country at one point agreed that it was ok to have OOV So whose to say that it does n’t fluctuate and in a hundred years society will be pro slavery again ?

(OOV\_comment\_begin) OOV But what if everyone had the same view that slavery was bad ? How does that hamper OOV OOV And how does that benefit society ? That s what you still haven t OOV Your argument seems to be that



the Slavery was ok because it brought about the civil rights movement , which is like saying being sick is ok because eventually you get better. It would have been best to not be OOV Also , I m unfamiliar with which countries have chattel slavery , if you could point me to them. OOV Nope , that s what ethical consistency is. Please explain how there is a 50/50 chance slavery is right. Someone haven t a different opinion doesn t make me wrong and them right. OOV That is so not chattel OOV You have a freedom of choice , of existence , that chattel slavery denies people. OOV Yes. OOV But that s not chattel OOV That s what I had intended to express , so I m revising my statement to be more OOV OOV Even if it is , unless you are a cultural OOV , that doesn t make it right. I specifically talked about the ethics of OOV OOV I m down for that , but you need to actually grapple with my points and not give me a 50 % chance of being wrong simply because there are 2 OOV Ethics is not flipping a coin .

### 570\_delta\_t1\_ck8b1lf.json (delta-ah)

(OOV\_comment\_begin) Well , I think you are halfway there , if not most of the way. You already realize there 's something wrong with the way you frame your actions and your situation. Every day something bad happens to everyone , something not amusing or OOV But it 's silly to think that they are caused by you OOV ! You got ta realize masturbating is not something bad , you are not OOV anything. It 's your own body , and it 's incredibly important to learn how it works and OOV Imagine someone feeling guilty because they exercised , of because they had interesting ideas. That 's silly ! Those are normal , natural and very healthy things to do ! Even exercise , that normally includes sweat and it 's messy and you get tired and your muscles ache , should n't this be a horrible activity ? Of course not ! Because you are doing something you know it 's good , and not only that , it feels good because your body releases feel-good hormones ! Also , I 'm The Doctor , but I think you may have some anxiety issues ? Or look at it this way , if God did n't wanted you to OOV , why did he give you the ability to do so ? Is he wrong ?

(OOV\_comment\_begin) I keep telling myself that it does n't harm anybody and hence should be okay. Some days I have myself convinced and then something shitty just happens out of the blue , like today. And about me having the ability to OOV , I also have the ability to do very despicable things , but it would be horrendous for me to exercise those OOV What do you mean by anxiety issues BTW ? How can I OOV it ? I 'd be glad if you could elaborate , if you do n't mind .

(OOV\_comment\_begin) About the anxiety thing , you feel guilty and blame it on OOV That 's kinda how some forms of anxiety works , there 's something that should n't bother you much that does. Also , I think you are very wrong in how you put the blame of things that happen. For example with your keys , you misplaced them because you made a OOV That 's it. Do n't try to blame it on something else you did or some kind of " destiny " or punishment , that 's a cop out. You misplaced them because you were careless , or made a mistake , or something else. Not because some oh disgraceful spell fell on you by OOV No .

### 156\_delta\_t1\_de8k0c8.json (delta-ah)

(OOV\_comment\_begin) Many , if not most people ca n't talk about their root ideologies because they are n't OOV aware of what those ideologies are. Pretty much all of the hot button issues that divide us are highly emotionally charged , and people rarely examine the intellectual underpinnings of their OOV For example , take a joke that you get but do n't think is funny vs someone that thinks it 's OOV You can talk all day about why the joke OOV n't funny , but you 'll never really figure out the core OOV difference that makes the difference. The same can apply to things you find scary / repugnant / uplifting , etc , and these things can carry with them the weight of life and death .

(OOV\_comment\_begin) Which is why I think we should talk about these things. Of course no one is consciously aware of their root ideologies if they 're never mentioned .

(OOV\_comment\_begin) It 's worse than that : people have a really strong tendency to use subconscious core beliefs to pick a side , then justify that position using other evidence. They convince themselves that the other evidence is the OOV reason they hold those OOV Example : clearly , KKK members , OOV and slave owners had racism as

one of their core OOV Yet , a quick Google dive will find you plenty of testimony from all three groups about why they are n't OOV You seem to be under the impression that they know they 're racist , and OOV Discussion about housing policy or affirmative action is just a proxy battle for the fight we should be having , over racism itself. I 'm saying that they are not OOV They legitimately ( and wrongly ) believe that they are not motivated by OOV Trying to make an OOV argument with them will fail , because they believe the core belief they are defending is “ states rights ” or “ personal liberty ”

#### 524\_delta\_t1\_cr3urij.json (delta-ah)

(OOV\_comment\_begin) OOV Then they do n't identify as either of the two OOV You do n't HAVE to follow the gender OOV Does n't mean there 's a third gender .

(OOV\_comment\_begin) As in : “ you can call yourself and do whatever you want , who OOV OOV there are 2 genders ” ?

(OOV\_comment\_begin) Well , OOV Gender is a social OOV That means humans define what it is. If you ask people how many genders there are , 99 % of people would say two. Therefore , there are two .

#### 1181\_delta\_t1\_cugf2po.json (delta-ah)

(OOV\_comment\_begin) But you have n't actually made any argument against the former , even though that 's the one you have used in your title , only against the OOV “ Feminism is only about equality ” is clearly true. After all , Affirmative action supporting feminism is only about supporting ( a particular understanding of ) equality , liberal feminism is only about supporting ( a particular understanding of ) equality , and so on , that 's true about all OOV as a whole. Without the implication that ONLY feminism is a valid understanding of equality , these are incredibly OOV statements that accurately communicate that feminism is not about something else than equality .

(OOV\_comment\_begin) OOV Not really , though. Discussions about female sexuality , for example , are most definitely common within feminism , but they have an end goal more focused on understanding one 's own identity than a broader idea of equality

(OOV\_comment\_begin) That still centers around the belief of understanding female sexuality has been a taboo that needs to be “ straightened out ” . It 's not done for it 's own sake , but to counter historical mistreatment .

#### 444\_delta\_t1\_dlbwt1v.json (delta-ah)

(OOV\_comment\_begin) Let 's go down the OOV OOV To start with , it 's kind of funny that this guy considers is disrespectful and OOV for someone to disagree with his beliefs OOV enough to respond to them , considering his entire argument is that we can distinguish between “ I respect you ” and “ I will ignore content. ” He wants the respect of being treated the exact same as everyone else regardless of what he does. But is aghast at the idea that women should be treated the same as men regardless of what they do ( like what they majored in in college ) . OOV Interesting , is n't it , that the author here argues the necessity of having different views represented and encouraged despite the natural tendency of the dominant culture to not appreciate those views ? And a desire to see the company changed to suit his desire that his smaller segment of the workforce be better represented ? Interesting , right ? OOV Except no one holds that extreme view. They hold the view that where differences in outcome have been observed between groups of people , rather than between two individual people , persisting across successive generations , it 's probably not just “ well they 're just different. ” OOV This should be fun. And let 's note the invocation of the ever-popular “ evolutionary psychology explains this because I can construct a scenario in which it would be evolutionarily OOV ” And then note that he does n't actually give any evidence for his claims that the “ psychological ” differences are “ universal across human OOV ” And a lack of evidence they 're related to prenatal OOV And a lack of evidence that the underlying traits are OOV In absence of evidence , this is just OOV He quotes one source , stating : OOV But clearly did n't read the actual article which requires making a big assumption : OOV In other words : if you assume that more egalitarian nations should lead to parity in job choices , you must explain the existence of a disparity in OOV OOV Small problem : this inconsistency can be resolved OOV by saying that this is the result of personal choice without cultural influence , OOV that the society is less egalitarian than OOV OOV I look in vain for a citation for this. Or an explanation of biological OOV More evo psych bullshit , you 'd think someone claiming to be one of those logical men who does n't need all those silly feelings would be able to tell the difference. OOV Which , again , can be just as cultural as anything else. One need look back only to World War II on the eastern front to see women expected to ( and fulfilling )

every demand for danger and physical labor with an almost fanatical OOV Look up the OOV , ask how many men you know working at **goddamned** Google would be willing to fly OOV planes without parachutes and OOV German **OOV** **OOV** Honest to god , this dude could n't be more OOV if he were a satirical version of one. Education does n't disadvantage competitiveness or OOV It pretty evenly splits between assignments requiring cooperation and those requiring OOV The problem male students face is that the same one this guy rejects : that some things are best done in one form as opposed to the other. OOV This is very correct. But belies just how OOV his previous **arguments** **are**. If **men** can be allowed to be more feminine , and some number would embrace that , it means that those men were adhering to gender roles solely out of societal OOV OOV pressure is neither evolutionary nor OOV And if that 's true , why would it not similarly be possible that women experiencing more anxiety , less drive for status and accolades , and even wanting more OOV balance are similarly due to societal pressures rather than some inherent fact of nature ? One need not go too far to find examples of women with drive and ambition being judged for not wanting families. Companies assuming that women ( even those with drive and ambition ) will eventually want a family and leave to be with the kids , and women who obtain power being immediately subject to all kinds of social admonition men do n't face. OOV Whoa there , OOV He above argued that google should want a greater inclusion of conservative views solely to eliminate a supposed bias and “ OOV ” OOV ” Not like my ideology which is based on my baseless understandings of evolutionary psychology and assumption that 21st century American culture is representative of all cultures ever. ” OOV Does he mean the ones he provides no **evidence** for and believe exist even when one controls for other factors ? Because while there is evidence for intelligence being OOV , it ( like height ) is influenced by conditions a hell of a lot. OOV That certainly is subject to an argument , yes. With many white men of minority viewpoints OOV about how their struggles for diversity are more important than the struggles for diversity by those who first have to get their foot in the door before their viewpoint matters at all. OOV Citation needed. Also a definition for “ OOV ” and why that 'd be related to “ OOV ” I 'm mostly going to skip the rest because it requires taking for granted three premises none of which he has demonstrated : ( 1 ) . That differences between men and women are biological and evolutionary rather than OOV ( 2 ) . That diversity of viewpoint ( and “ psychological safety ” ) is a more important issue than diversity of OOV **Though** odd that he does n't consider the “ psychological safety ” of being the only black guy in one 's department , or only Hispanic woman on a floor. ( 3 ) . OOV disrespect or discrimination is n't bad , attempts to end discrimination are silencing the voices of those poor downtrodden white men .

(OOV\_comment\_begin) I will go through your responses in detail , and give reasons for why it does n't change the view I hold , which is analogous to OOV view : OOV OOV This is a OOV of the statement you OOV What he is referring to is the culture of shaming someone because you disagree with them ( ie attacking them with OOV , OOV arguments and similar **fallacies** , instead of responding to their actual argument and engaging in a constructive debate ) , or simply silencing them ( ie how Googles [ VIP of Diversity ] ( [https : OOV](https://www.google.com/diversity/vip/) ) does n't link back to the original document in order to avoid spreading it ) . The response from Googles VIP of Diversity is actually somewhat of an example of what he is referring to : She simply states that the premise is entirely wrong , providing about as much citation and backing to her claims as the author of the paper does for his claims about biological OOV OOV OOV I personally believe that “ just being different ” is enough for certain groups to have different tendencies - which then later will be reflected in OOV But it should always be noted - as he himself does in the paper lots of times - that individual differences OOV outweigh differences between groups. For example here : OOV Let 's go on : OOV OOV OOV OOV This again sounds like a OOV of what was stated in the paper. The above quote shows that the author is heavily in favor of individuals being allowed and able to do however they choose , rather than doing any OOV based on their group. Your argument is against the view that “ Women just are n't suited to tech ” , which is a strawman argument , because the paper never stated this in a form as extreme as this. It merely stated that the tendency of the “ women ” group may be naturally guiding them to OOV things , but noting that he also states , as quoted above , that individual differences outweigh differences between groups , so this is no reason women should be discouraged OOV encouraged to join tech any more than men. He later even lists ideas that in his view would help women get a better footing in tech ( whether these would work , or if they make sense in your or my eyes is irrelevant as it still shows the intent ) . OOV OOV He stated previously in the paper that it is his belief that the bias and “ OOV ” he is referring to ( ie being PC , shaming and silencing ) is harmful to OOV Therefore , his view is consistent here about wanting to “ fix ” these things to help / optimize for OOV OOV OOV Going to OOV on the author and **attacking** them because they are expressing an opinion on the status quo that you disagree with is something I find harmful to your OOV Also he really just calls for evidence - a call where he later in the memo returns the favor , stating that if internal debate arises ( ie at Google ) he will provide OOV This could obviously just be hot air and he might not have credible sources , but it clearly shows that he OOV care about data and facts to support his views and would like the opposing side of the debate to do the same ( ie show the data and facts that make them reach their conclusions ) . OOV OOV I agree with the point raised by the OOV I also agree that its important to give people a foothold so they can develop their own OOV Also , you are assuming the author is a white man , instead of a black man , for some reason : - ) OOV OOV OOV OOV To 1 ) : I believe that differences in groups as wide as “ men ” and “ women ” arise by interactions of a lot of different OOV Why could biological factors not be one of those , alongside **societal** ? It does n't seem far-fetched to me that men and women in general have different behavioral tendencies due to biology , too ( note that [ hormones influence behaviour ] ( [https : OOV # OOV](https://www.google.com/diversity/vip/) ) , and men and women have different levels of testosterone ( and other hormones ) ) , not just due to societal OOV To 2 ) : I find it hard to weigh these **issues** , **but** I certainly believe that OOV are important. To 3 ) : This is less a blanket statement of his , from what

I understood ( correct me if he formulated it as one ) and more of a prioritization thing , ie he believes it is more important to be generally tolerant than to attempt avoiding OOV OOV themselves are a contentious issue , as there are people with different viewpoints on the issue. I do n't really have a strong opinion on this myself , other than that I believe that being generally OOV is more important than avoiding OOV I would really like to hear refutes to this paper that do n't build on OOV of statements the author makes , or ad hominem arguments , as these generally have no power in changing my view .

(OOV\_comment\_begin) OOV Yep , those are the complaints of someone who already has his foot in the door and sees greater harm from “ I ca n't express myself the way I want and have my company adopt my views based on my clear superiority of logic and reason ” than from other people not getting their foot in the door to begin with. That 's a distinction , but the fundamental conceit ( discrimination is bad , diversity of views is good ) is no different. The same “ the company can do what it wants and should n't give special dispensation to give a voice to the voiceless ” justification he has for the end of Google 's policies also applies to him. OOV You should probably look up the burden of proof and the null OOV Funny how the people quickest to throw out OOV “ OMG it 's a fallacy , that 's bad , I win ” arguments are also the most likely to invoke inane “ well I do n't have evidence that X is true , but you ca n't prove it is n't , so we 're equal ” OOV Since I 'm pretty sure you 're not ignorant or stupid enough to be unaware that the claim that “ there is a biological difference between these groups leading to X ” bears the burden of proving that , whereas “ there is not a biological difference ” need not prove the negative , it means you 're being OOV OOV And since your personal belief about the cause of a statistical reality is something more than an ad-hoc hypothesis , that should be granted credence because ... ? OOV Notice how you immediately have to soften his language. To reduce what he actually wrote : OOV to “ well he 's just saying there might be

something there which maybe has some kind of OOV ” Defend what he wrote , not what may have been a more reasoned and temperate version of what he OOV OOV And if you take his unproven premise ( that the disparities between men and women in tech are explained by natural , immutable , phenomena ) to be true , you 'd be right to follow it to his OOV But since this entire discussion is over whether that premise is true , and he provides no evidence for it other than vague allusion to “ something something hormones ” and “ well evolution ... ” OOV And the “ OOV ” he rails against has stated that diversity is beneficial to Google , and it is more optimal to bring in a wider group of backgrounds into an industry largely dominated by white men. Hell , as Google itself has stated , this kind of inflammatory and baseless language is harmful to the work environment ( hence the supposed silencing of conservative views actually beneficial ) . If we 're not discussing substance , just “ intent ” , both sides intend to do good so what 's your point ? OOV If you 're going to use fallacies like magic words again , you should look up what they are. Noting that the author has the burden of proof to support his views and fails to do so is not a “ tu OOV ” Noting that he OOV the current system as being without evidence while providing

zero evidence for the superiority of any other system is simply demanding that he fulfill his OOV OOV ” I 'll gladly pay you Tuesday for a hamburger today. ” He needs evidence to reach the threshold of legitimacy for a debate to happen. He does not gain equal footing with the official stance of Google based solely on “ well if you agreed to debate me I 'd provide evidence for all of the speculative claims I made while arguing that there should be a debate. ” OOV While having none which he is willing to OOV Generally when I care about facts and have tons which support my views , I 'm eager to get them out as quickly as possible. OOV Hm ... Are you saying that it 's important to give people the opportunity to grow and develop , even if they do not begin with all of the knowledge and skills necessary ? That there is a net benefit to giving someone a “ foothold ” or a “ foot in the door ” of growth and development even if they are currently behind the curve ? OOV OOV I 'll play the odds on this. Google is predominately white men , and I 've yet to meet a black person other than Clarence Thomas quite so committed to there being a genetic basis for his own OOV OOV Maybe it could , but that 's not what the author OOV I 'll quote again : “ Women , on average , have more ... This leads to women generally having a harder time negotiating salary , asking for raises , speaking up , and OOV ” Not “ could lead to ... and deserves further study and OOV ” He is claiming a causal relationship between a fact he has not demonstrated and an observed OOV OOV Except , again , what he wrote was n't “ hey I do n't know much about this , but we should OOV ” He wrote that these differences exist , are inherent and universal across all human culture , and are the result of evolutionary biology ( including that apparently modern monogamous heterosexual relationships in the developed world are reflective of all sexual selection across all of human culture for all of time ) . ” It does n't seem far-fetched ” is not data. OOV ” OOV training incorrectly

and dangerously equates speech with violence and isn't backed by evidence. ” Ignoring his OOV of what OOV training actually states , that 's far from mere “ OOV ” OOV OOV OOV The author has failed to fulfill his burden of proof to gain even the slightest semblance of credibility worthy of being debated on OOV You invoke any number of fallacies , and ignore the biggest one : claims for the existence of a fundamental and inherent difference between groups of people requires evidence. Which , if I may be so bold , pretty squarely indicates that your agreement and defense stems from agreeing with him on a shallow and visceral level , rather than on any substantive one. The fact that what he wrote made sense to you does n't mean it has any basis in reality. If you need examples of that throughout human history , I am happy to provide .



## 208\_delta\_t1\_dcffg0z.json (delta-ah)

(OOV\_comment\_begin) OOV I think most people would agree with you on this point , but disagree that “ OOV ” has n’t been about creating opportunity in black communities , check out LBJ ’s “ Great Society ” OOV I think you need to examine why black people are trapped in systematic OOV Most black people in the US are descended from slaves who even after the end of slavery were never able to amass wealth because they never had the money for initial investments like buying land so they ended up working for the same people that had previously enslaved them , and then being more willing to move to northern cities for factory jobs during the industrial OOV This is not true for the US Asian population. People talk about how Chinese people were mistreated during the building of the continental railroad and Japanese internment camps , but the fact is that until the immigration laws were relaxed in the 60s there were not many asian people in the OOV The majority of Asian people in the US currently are either economic migrants who came here because they got good jobs or are their OOV Another important note is that those put in Japanese internment camps received some reparations for the wealth lost during their internment , US slaves never really got their “ 40 acres and mule ” .

(OOV\_comment\_begin) That ’s a good point for the Chinese who moved in here. That then files under immigration / OOV My point of view still stands though : Blacks need will be treated differently only if their income levels OOV What you are saying is more that their income levels will never reach those of whites because of slavery based OOV I do n’t think racism will go away significantly without wealth creation by Blacks

(OOV\_comment\_begin) I think you are trapped in a sort of chicken and egg scenario though , stereotypes are exploited by politicians to cut social programs which in turn perpetuate the systematic poverty and reinforce the stereotypes .

## 852\_delta\_t1\_crfegvw.json (delta-ah)

(OOV\_comment\_begin) Edit : I AM NOT OOV YOU SHOULD VOTE FOR A WOMAN JUST BECAUSE SHE ’S A OOV I ’M NOT TALKING ABOUT OOV AT OOV – – – – – Why should you be excited about who is president ? What ’s exciting about that ? I can tell you why some people are excited , but it wo n’t necessarily get you excited , because if the first woman president does n’t already get you excited , then me telling you that ’s why other people are excited is n’t going to change your mind. But I am excited to have the first woman president. It wa n’t at all about not having a white male in office ; it ’s about having a minority or a woman in office. That ’s so odd that you ’d think the whole point of the excitement over Obama was about the absence of a white man and not about the presence of a black man. The excitement was about the presence of a black man in the Oval Office , just like the excitement over Clinton is about the presence of a woman in the Oval OOV It ’s not about the absence of white men at all .

(OOV\_comment\_begin) So , you ’re willing to vote for the most establishment , least forward thinking candidate imaginable , just because she ’s a woman ? My point was that it was a lot harder - almost a miracle - for a black man to be elected president. Why should I get excited for a comparatively more privileged white woman , and a OOV one at that ?

(OOV\_comment\_begin) OOV No , do n’t jump to OOV I ’m only explaining why I and other people would be excited if Clinton were president ; not that I ( or others ) would vote for her. OOV How on earth are you arguing it ’s harder for a black man to be president than a white woman when we ’ve had a black man but not a white woman ? AND when those two exact people we ’re talking about competed in a primary election against each other ? It was an OOV “ study ” or “ test ” to prove which person is more likely to be chosen by the public - black man or white woman - and the public chose the man. OOV Well for OOV specifically , with the OOV thing , I would n’t try to convince you. But for a woman in general , I mean , I think it ’s self explanatory why that ’s exciting : it ’s breaking a glass ceiling and putting a woman in the highest office in the land as has never happened before. If you do n’t care about that stuff , then it wo n’t excite you , but you ’re acting like you do n’t even know why people are OOV That ’s why .



### 1227\_delta\_t1\_cyokq66.json (delta-ah)

(OOV\_comment\_begin) While I'll agree with it in the proportions you specify, the question is how far can you take that? For example, I think clearly we would n't want to say that it's better for OOV criminals to go free than for a single innocent person be OOV. Because at that point, punishment for crimes is impossible, and we run into a whole different kind of "prisoner's dilemma" sort of problem. Is it OOV? That's generally the standard that people use colloquially, and honestly I think that's about the proportion that we have to use in order to have any chance of stopping crime. We can always recompense innocent victims if it can be shown they were innocent, but the people victimized by criminals we let go unjustly can't always be compensated, even assuming we were to try, which we don't. This is why the standard for guilt is OOV doubt, not all possible OOV. There is always some possible OOV. Sure, there must be evidence of a kind that convinces almost everyone pretty much completely (e.g. 12/12 randomly selected people seems about right). And that is what we do. It's easy to say this about 1 guilty person OOV one innocent person. What's OOV threshold? Do you just want all criminals to be set free? I doubt it, but extreme cases do n't tell us much about what is right.

(OOV\_comment\_begin) OOV There must be some kind of hard evidence. A person should not be convicted on circumstantial evidence alone. If a woman says she was raped, but there is no physical evidence of a rape, then the suspect should be set free.

(OOV\_comment\_begin) Just for rape? Or if someone accuses a thief of stealing their wallet, and identifies them in a lineup, and can be shown not to know the person or have a grudge against them, and testifies convincingly, but the police can't find the wallet or link the thief to it, they should go free? Basically, is all you're saying that eyewitness testimony by victims should be given no weight? That seems ... like a bad idea.

### 604\_delta\_t1\_d6qpafn.json (delta-ah)

(OOV\_comment\_begin) Sure, I see your point. There are some serious flaws in your logic, though. I do n't think that a baby that is not yet conceived can be considered a "person." Additionally, if you are pro-choice, you must reject the notion that a fetus is a human; thus, you are contradicting yourself again. If you are pro-life, then abortion is out of the question anyway. Edit: Why not just let Darwinism do its thing?

(OOV\_comment\_begin) A fetus is not a person. But OOV talking about the child after he/she is OOV. Then whatever illness he/she has will produce OOV. I am trying to prevent that.

(OOV\_comment\_begin) You are resting your case on shaky logic then. How is it that you know for certain this child would prefer to be dead instead of alive? If so, why not just give the child the opportunity to commit suicide when they can make the decision for themselves?

### 769\_delta\_t1\_cf0e8n2.json (delta-ah)

(OOV\_comment\_begin) Ok, but what's the upside of holding the gun to my head? If you're talking a billion dollars if the Russian Roulette is in my favor, then I might do it. I have a 70% chance of winning a billion dollars, which might be worth it depending upon how much I value my own life. I'm not saying that you can be 100% sure that no infidelity has OOV. It's just that if there are no changes in behavior, no opportunity for infidelity, no interest in infidelity, no serious relationship problems in the appropriate time frame, or reason to suspect that infidelity had occurred, then what is the upside to tacitly accusing someone of infidelity? If you have reason to be concerned that's different and OOV. If you do n't that's a different ball of OOV. Did you know that accusing someone of infidelity increases the odds that they will be unfaithful? If you want to drive someone away, that's a great start.

(OOV\_comment\_begin) Good points (not who you were replying to, just new blood in this convo). I think OP would be more accurate if he stated that "past cheaters" are more likely to leave because of it, since they have displayed OOV in the past, and that's a hard thing to gain trust back on.

(OOV\_comment\_begin) If there has been a mature discussion about the concern, the past cheater shows signs of being

serious , and it 's part of a larger plan for a “ fresh start ” then I would OOV At that point backing out at the paternity test would demonstrate OOV , an intent to defraud the nominal father , and an intent to cheat again. In those cases , I would agree with the OOV To apply that to all women strikes me as wrong .

#### 1049\_delta\_t1\_djfwc9y.json (delta-ah)

(OOV\_comment\_begin) OOV If I did n't endorse a ban , and if I did lie about why , then would my belief still be morally wrong ?

(OOV\_comment\_begin) OOV This feels like cyclical reasoning to me. Play this out in practical OOV When would your hypothetical happen in the real world ?

(OOV\_comment\_begin) I thought we just did that , but sure. Someone asks me why I do n't use a cell phone , and I just say “ I just do n't really like cell OOV ” I may not want to bother others with my phobia of getting cancer from a phone , or I may be embarrassed of it. That does n't mean I do n't believe it. Is this a morally indefensible situation ?

#### 745\_delta\_t1\_clya6rm.json (delta-ah)

(OOV\_comment\_begin) The keyword in your CMV that I m going to latch onto is the word deserve . Some of the punishments received by people in various countries are cruel to say the OOV Often the degree of OOV is hard or impossible to fathom for anyone who OOV t experienced it. Others in the thread have already mentioned that people in Singapore ( and Malaysia ) receive OOV ( a form of torture ) for some OOV North Korea is the epitome of cruel and unusual punishment , placing people in concentration camps for the rest of their lives OOV the next three generations after OOV , where they have insufficient access to food , no access to information , no entertainment , virtually no interaction with other prisoners , and virtually no free time from hard , OOV physical OOV The view that you have expressed is that anyone who goes to a country and breaks one of its laws , even unknowingly or accidentally , OOV this form of punishment , and the only reason you ve stated for that is that one could have known beforehand what one was in for. If you honestly believe that , then you OOV t mind if your home country also started administering such punishments , or you would be OOV After all , here in the western world , we clearly lay out the fate that awaits anyone who breaks the law , so you always know what you re in for when you commit a crime , right ? But you know that European and North American countries do not , in general , make use of such inhumane OOV Why is that ? It s because their population ( largely ) believes that , as human beings , we OOV not OOV certain kinds of treatment , OOV after committing a OOV The kinds of gruesome punishments I m thinking of are considered to be OOV violation of human OOV , and criminals are humans too. Logically , you don t stop being a human when you go to another country , so it would be a OOV to say that a certain punishment would be OOV over there but not over here. Now , ( most of ) the population of ( most ) western countries believes this OOV about criminals who have committed heinous acts against their fellow OOV Your CMV , however , is not even about heinous crimes , but about political activism and religious OOV , both acts in which other humans OOV t even being OOV Any reasonable human being in their right mind would not consider a jail sentence to be a commensurate punishment for such an action , much less for it to be OOV The reason those governments jail you for it is because of political circumstances ( e.g. corruption ) and not because they really believe you morally OOV it .

(OOV\_comment\_begin) They do n't deserve punishment , but they should expect it. OOV They do. In the USA there 's plenty of innocent men sitting in jail , sometimes with life OOV It 's very likely that more than a few innocent prisoners were executed by the state. And we 've had political OOV And we have religious discrimination ( it 'll be a very long time before the American public will elect an atheist ) . OOV OOV They jail you because they can use you for leverage if you 're a OOV They gain a helluva lot more than you did. You did n't change the system one OOV Perhaps there 's 2000 people watching CNN who learned for the first time about country x 's government and its horrendous OOV That does n't help anyone .

(OOV\_comment\_begin) OOV But in your CMV you said they do , so either I ve changed your view , or you were unclear about what your original view was : ) You totally missed my point about cruel punishment. It wasn't about OOV men sitting in jail at all. It was about what punishment a human being OOV , even in a hypothetical perfect system in which no innocent person is accidentally OOV You also didn't really make a point of your own ( about the USA ) . You're just describing the current situation. I already know that this is the case .

### 1226\_delta\_t1\_d9svs3h.json (delta-ah)

(OOV\_comment\_begin) You are reading far more into this than is really there. Clinton is widely viewed to be a corrupt liar ; and for good reason. There is ample evidence that they rigged their own OOV Voting against a deeply corrupt woman is not the same as voting against women .

(OOV\_comment\_begin) OOV Which I never said nor OOV Trump's victory means we do n't mind sexism not because of anything to do with Hillary , but because he's a sexist pig and we're ok with it .

(OOV\_comment\_begin) OOV When you force people to choose between sexism and corruption , it is n't fair to say that they are ok with either .

### 1079\_delta\_t1\_cpd0rtm.json (delta-ah)

(OOV\_comment\_begin) OOV are the most paying fields male dominated ?

(OOV\_comment\_begin) VERY GOOD OOV i simply do n't know why it is OOV but i think you may be on to something. i felt a twinge of doubt creep over me when you asked that question. i would love to know where you are going with this. you may get the delta !

(OOV\_comment\_begin) The idea of a pay gap is n't necessarily about the same work being remunerated OOV While this might happen , and might be interesting to study more in depth ( for example , why are Women so systematically less assertive than men ? ) , that's not the only manifestation of the OOV There's also the issue of women , in general , earning less than men. This means that female , as a class of people , earn less than males in society . As you said yourself , high paying fields are male dominated , which is probably the reason for the OOV However , you need not consider this as a simple fact of nature , as you seem to be doing now. You need to ask yourself OOV that is and what it teaches us about our society. Because , there's no actual reason why STEM is such a sausage OOV Women can perform just fine , yet they don't. OOV ? It's OOV Especially considering it's a lucrative field. Why are they not showing up equally in lucrative fields ? Is it because there's pressure to go into more typical fields ? Why are typical female occupation so undervalued ( I do n't know if you're familiar with a nurse's daily work , but it's extremely underpaid ) .

### 367\_delta\_t1\_ceaosh0.json (delta-ah)

(OOV\_comment\_begin) Two key features to psychiatric illness are 1. Is it causing the patient harm 2. Is it culturally OOV If I'm assessing someone for psychotic symptoms and ask if they have ever heard voices , if they say " Yes after my mother died I thought I could hear her for a few days. But it went away. " or " Yes when I pray I can hear God speak to me " they are n't seen as having psychotic symptoms because those are normal experiences in some OOV So , if you're talking about this : http : OOV in the context of Tibetan Buddhism I'd say it's a culturally sanctioned OOV If you're talking about this : http : OOV ? OOV then it's tricky and the belief is certainly unusual in an American experience. But if the person is not suffering because of just that belief , then I do n't actually know if any psychoactive medication would eliminate the idea from their mind ( presuming the OOV is the only thing they believe in and they are n't having traditional hallucinations ) . Now , when people who have other problems create OOV , that's an interesting issue. From a psychological point of view I guess a OOV would be a maladaptive coping mechanism for handling whatever internal stresses they OOV But in that case you would be treating a person who is not

dealing well with the world in general , and OOV are a part of that , you 're not just trying to get rid of the OOV ideas they have .

(OOV\_comment\_begin) That NYT link is dead , but I would be interested in reading it. I 'll admit , I have n't done to much research into the history of OOV OOV My information was gathered from OOV and OOV You 're right , OOV are probably a symptom as opposed to a problem. But I hesitate to delta you , as that was alluded to , if not stated in the OP .

(OOV\_comment\_begin) Weird , link is working for me. It 's citation 14 in the wiki OOV In arguing for my own delta , I would say I 've changed your view by demonstrating that there are people for whom OOV is a culturally normative and mentally healthy thing .

#### 145\_delta\_t1\_cg5kzla.json (delta-ah)

(OOV\_comment\_begin) Good point , you did n't explicitly use that word , but there 's something in your language that makes me feel like you are blaming the women for encouraging rape ... I think it might go back to that dismissive " excepting " that I mentioned earlier : Women have always chosen this , ( except when they did n't ... ) it makes it sound like the situation they 're in now is the result of their choice , and neglects the fact that OOV has happened throughout ages of human development , up to and including recent times. ( The U.N. only declared rape a war crime in 2008 ... which means the holocaust rapes probably OOV prosecuted as war OOV Or Korea , Vietnam or what , maybe even Serbia , Mogadishu or Afghanistan OOV ) We 're looking at this from a perspective of today ... suppose they OOV with rapists so that they have adapted to tolerate it when it happens. Just because their body is capable of arousal during rape , does not mean that it 's OOV Heck , just because someone might fantasize about something does n't mean it 's OOV But more importantly , just because some ( not all ) women fantasize about rape , does n't mean that those who do not fantasize about it also somehow secretly , OOV desire it , does it ?

(OOV\_comment\_begin) It was n't a dismissive except , it was a preemptive except because the world is not absolute and my position was that women mostly choose whom mates with them but I knew someone would bring this up. So why is the rape fantasy prevalent in our society ?

(OOV\_comment\_begin) OOV Sorry to split my points , but I had a couple more thoughts later. First , if a woman is enjoying the idea of being taken by force , then it 's not OOV , is it ? If ( in her fantasy , mind you ) it 's something that she wants , then it 's not rape , it 's consensual rape role-play between her and her OOV Not quite the same thing. But to get more to the OOV about it ... If the rape fantasy is a result of women evolving to want or enjoy rape , why do OOV have OOV fantasies ? I could n't find any statistics , but a cursory search indicates that it happens both in out gay men , and in " straight " dudes ... to me , that leans away from the idea that it is something particular to women. And more importantly to me , as a straight dude who does n't have fantasies of getting OOV , ( I 'm just guessing you are , stop me if I 'm wrong there. ) ... how would you feel if someone cited the fact that straight guys sometimes fantasize about gay rape , and used that to imply that somehow all straight guys as a class , including you , wanted to be raped by a dude ?

#### 1193\_delta\_t1\_cd21ove.json (delta-ah)

(OOV\_comment\_begin) Simple hypothetical models are not the basis of governing the most powerful nation-state on Earth. They 're anecdotal until someone documents them working , and under what conditions they succeed or OOV Since we agree the EPA is a poor example , is there another agency or policy we can focus on ?

(OOV\_comment\_begin) OOV I 've explained my reason for my principle in the simplest manner I know how , but your skepticism is OOV For as simple as the model is , it does make some critical assumptions , one of which is the honest effort of all players. Assuming plans start at the local level and receive greater scrutiny as they grow , a dishonest player could skip or forge endorsements at these low levels in order to gain enough political momentum to achieve their objective ( i.e. a toxic factory in the middle of district X ) . OOV I went after minimum wage [ here

] ( http : OOV ) but I 'm open to whichever way you want to wind this OOV Also , being as you appear to be intelligent and open minded , I 'm taking the liberty of OOV you .

(OOV\_comment\_begin) Hey , that 's OOV I have a new reddit friend ! I 'll come back to this discussion after some coffee ... .

### 388\_delta.t1\_cse4a93.json (delta-ah)

(OOV\_comment\_begin) Sorry but you entire post is OOV The vast majority of firearms atrocities are committed by governments , not the people. For more information refer here : https : OOV

(OOV\_comment\_begin) I would indeed feel safer when disarmed by my government. i dont see how it is comforting for people to think that they can OOV the OOV by lethal force. look at the middle east in the past OOV various dictators have been forced to give up their power which they didnt ment to do. however they came to understanding when the people protested and they didnt need guns for that. coming back to my first OOV ; i dont feel like i need to have some control over the OOV , i just need freedom and protection from my government. It might be that governments abuse guns more than civilians , but at least i would know that a civilian doesnt have a gun and a cop will have a gun and has more training with it than any OOV gun owner would .

(OOV\_comment\_begin) OOV Then you have studied no history , and are part of the problem. Your ignorance of their heinous crimes does n't make your point any more correct , and neither do your " OOV " The objective truth is that governments are responsible for the greatest crimes this earth has ever seen , and they are far more dangerous than an armed populace as has been proven thousands of times over. German , Russia , the US , the Great Empires etc. You need to do some serious learning prior to posting about your " OOV " OOV Ok , looks like the OOV are doing quite well with their armed OOV OOV aside though , your massive OOV and characterization of the situation in the Middle East is again indicative of massive ignorance on your part. The Middle East has been a playground of the OOV powers , pitting populations against one another for OOV We arm sides against one ( OOV , OOV , OOV , etc. ) another all to destabilize the region and steal their resources. The recent revolutions only succeeded in implanting new western OOV , and in the only region that resisted , has been a bloody civil war sponsored by the US and it 's allies ( and Russia ) in OOV So that 's out. OOV Your feelings are entirely irrelevant , and OOV Did you even read the post I linked ? Control is gained over you regardless of how you " feel " or are brainwashed or OOV to " OOV " Those in power want more power and will get it if they disarm the population , that is a simple statement of fact. OOV No it is n't " might be " it IS a fact. OOV Wow you must live an extremely sheltered life. First of all , most cops are OOV trained with OOV There are innumerable firearms owners that are WAY more qualified than your average cop , including but not limited to competitors like OOV 's and bench shooters , not to mention OOV This is true even for the more trained " SWAT " members , and anyone familiar with firearms owners or the police would know this. It is clear you have experience with OOV On top of that the police are not you friends , they are the thugs of the ruling class. Them having a monopoly on violence is a BAD thing. The police commit more atrocities than civilians do worldwide , and at home to a certain OOV BUT even if we assumed that this was not the case ( even though it is ) cops will not be there for you when you need them. Response times are often in the OOV range , well after you have been murdered or OOV The inability to defend yourself is a violation of your human rights. I have no particular love for the idealized worker as he appears in the bourgeois Communist s mind , but when I see an actual OOV worker in conflict with his natural enemy , the policeman , I do not have to ask myself which side I am on. George Orwell So all in all , not a single thing you said was correct. For an more detailed explanation of the political aspect give this a read : https : OOV

### 370\_delta.t1\_ckx7slq.json (delta-ah)

(OOV\_comment\_begin) So you OOV be ok with the government killing innocent people now , but if there is a slight possibility that they have OOV you 're perfectly fine having them killed for no other reason than the fact that there is a small chance of them having this disease ? Do you not see any moral issues with this ?

(OOV\_comment\_begin) Sure I see moral issues but morals are not important if half the country could get a disease that has a 90 % fatality rate .

(OOV\_comment\_begin) Half of what country ? Also , Ebola that 90 % figure is the absolute high in countries with extremely poor medical care and OOV The fatality rate of the current outbreak is around 60 % while the fatality rate of OOV in the United States is currently 0 % . No one has died from OOV in the



United States. Killing innocent civilians that may ( but most likely do n't ) have a disease that has a 100 % survival rate in your own country seems a little extreme does n't it ?

#### 665\_delta\_t1\_czld8nb.json (delta-ah)

(OOV\_comment\_begin) Ah , but that 's the thing - I 'd include a small but ( I believe ) crucial addition to that OOV I 'd say " Did a gun ban decrease the amount of homicides in Australia , OOV the level it would have been , had there been no gun OOV " I think the critical issue here is whether people , determined to commit a homicide , have just switched from guns to other OOV I 'm sure some people have. But because it 's far easier to kill someone using a gun , compared to other methods , it 's hard for me to believe that the gun law had no impact .  
(OOV\_comment\_begin) Do I give you a delta if you 've changed my question , but not my view ? Paging OOV  
(OOV\_comment\_begin) Haha go on , go on. You know you want to. Thanks for the discussion , it 's been enjoyable .

#### 206\_delta\_t1\_cu362c4.json (delta-ah)

(OOV\_comment\_begin) OOV and OOV are pretty similar from my experience. The main difference is where it is OOV But arguing that OOV should be at the beginning is like arguing that a footer should be at the top of the page. I prefer OOV because I 'm more likely to read the first or second paragraph , and then make a decision to either read the whole thing or jump to the OOV .  
(OOV\_comment\_begin) OOV Not OOV There are stricter guidelines in formal writing , and footnotes are used in certain ways more often than that not. OOV Interesting OOV Could you tell me why having a TL ; DR right at the top would n't help you make your decision quicker than your current method ?  
(OOV\_comment\_begin) OOV Mainly , because I disagree with your original assertion that TL ; DR is for a lazy OOV In my case , it 's not that I 'm lazy , it is that I 've become disinterested in what you are writing , and so I 've started skimming over the rest of it. TL ; DR is a quick summary at the end that I 'll at least pay attention to. It 's your last chance to OOV me as a reader .

#### 540\_delta\_t1\_d5tkvju.json (delta-ah)

(OOV\_comment\_begin) OOV How do I know that is even happening ? Its not like those people have their names and addresses on that site - the victims are obscured so you do n't know who it was and just read the story. The families have whatever level of anonymity they OOV They can choose to ignore the whole thing. OOV It is n't - the name and details of the person in question are not made known - only the story .  
(OOV\_comment\_begin) OOV Weird , the last time I looked at them , the peoples ' full names were pretty visible the majority of the time ( Ken Charles Berger , OOV T. , OOV B. ) . And simply saying " they can choose to ignore it " is exactly like telling a victim of verbal abuse " well , you have the choice to ignore it so why are you so sensitive ? " . And I admit , some stories have the names obscured but others are pretty visible , along with the place in which they happened. Like I said , to me it 's pretty insensitive .

(OOV\_comment\_begin) OOV All the version I ever saw did n't have OOV Perhaps there are some that do , but that is no indication those are the actual OOV OOV It is a slippery slope to tell people they are being cruel by discussing an event that actually happened. If the person is embarrassed by it , that is really on them to accept history and move on. It is also a bit different than normal verbal abuse because we are not going to these families directly and mocking them - we are laughing at events far away from them. It would be like an overweight person being offended that I said something against fat people that they heard second hand - was I really being cruel when I never intended that person to hear what I said ? OOV To be a stickler here , you said it was OOV It does n't meet the standard of cruelty .

#### 927\_delta\_t1\_dhif5ab.json (delta-ah)

(OOV\_comment\_begin) Hello , I must say I 'm most glad that the good Liberal Democrats have OOV this and a good increase from OOV OOV OOV My neighbour has a yellow house , a most OOV colour , shall we have OOV pass a law so

yellow paint is OOV My other OOV likes OOV and I do n't like the smell of smoke nor food being cooked on a OOV Should Parliament pass a law so OOV coal or wood in ones garden is OOV and certainly it is illegal to cook food there ? There is also the case that legal weed could remove the OOV smell , most strains are n't too OOV When it is a black market it is more bang for buck than anything leading to the OOV of the nasty smelling ones. A white market would n't run into these problems. OOV OOV made quite a good point on this on OOV , should we ban OOV ? Alcohol ? OOV ? Where does your moral OOV OOV go ? OOV It is a criminal offence to be drunk , it is a criminal offence to be drunk and disorderly , I see no reason why this would n't apply to being high of OOV Why is alcohol legal , it just makes people think it 's safe to drink and drive and drink in public. That is the OOV you are taking here. OOV OOV Are you claiming we do n't have drug led gang violence as OOV move to OOV the trade in certain OOV OOV OOV Tell anyone their OOV should be outlawed and look down on them for it , you 'll get a OOV response from them. OOV Benefit , in the comfort of their own free time they partake in a drug to distance themselves from the world for a bit of quite down time , you do n't see anything OOV do n't do it. I see no gain from stretchers in ones ear , does n't mean it should be OOV OOV Why ? So long as there is no OOV they are reasonably in control of themselves what is the problem , you are n't truly negatively effected , nor is anyone else .

(OOV\_comment\_begin) OOV I seem to be getting a lot of hate for explaining I have n't had the best experience of it so far. I intended that to explain some of my OOV OOV All I know is that I recognize the smell , and that makes me feel ill. If it would truly lessen that , then I can see a benefit to legalizing things. But I do n't have any experience that tells me that is the case. OOV I have no problem with OOV , or nicotine , or similar , because they do n't impair people to any OOV OOV I 've always been against , and the whole concept of cannabis simply seems to be 'get high ' , much like most of this generation seems to use OOV There does n't seem , in my experience , to be a middle ground - where you can get a buzz , but without sacrificing some mental capacity , without seeming 'not entirely OOV OOV I would certainly hope that if they were to legalize cannabis , this would be one of the primary things they OOV do. As a motorcyclist , anything that impairs someone 's judgement - OOV if they 're driving - is a danger on the road - to me , to other motorists , and to any pedestrians or passers OOV It 's already illegal to drive under the influence of drugs , that does n't stop people. It 's already illegal to drive while drunk , that does n't stop people. Why should legalizing make that any different ? If anything , that would make it OOV OOV OOV Far from it. I 'm just clarifying that gun crime is n't such an issue here , I thought the response implied this was in reference to America. OOV I 'm not referring so much to that as I am the fact that pot smokers seem to take such a defiant stance when people say they 're not happy with the fact they do OOV Perhaps it 's because it \*is\* illegal and they feel the need to defend themselves , but I do n't know - that 's why I posted here in the first place. Skydiving does n't leave people without full control of their actions. You ca n't dismiss something OOV I 'd been skydiving ' so easily as OOV I was drunk ' or OOV I was OOV OOV I do n't see much issue with people doing it in their own home , provided they are respectful about it. I have more of an issue with the fact it would become a public OOV OOV Correct me if I 'm wrong , but is n't Cannabis a psychoactive drug ? Is n't the whole point of it to produce that sense of euphoria , that feeling of 'being high ' ? As that seems to be the entire aim of the activity , I do n't see how you could limit it so that people OOV affected without some negative effects .

(OOV\_comment\_begin) OOV I 'm not OOV on you , I 'm just saying why should n't we get an Act of Parliament to ban what my neighbour does that I do n't like ? Why should my OOV be free to consume a drug because I have a slight problem with the OOV OOV Have you been to a country that does n't prohibit it ? The smell is general far nicer and nowhere near as offensive on the OOV OOV Do n't get drunk then. Do n't smoke till you are high then. Why should your view of what is right and wrong with respect to taking of drugs be forced onto others , why should we have laws that do that ? OOV So ? If one so wishes to get off their face why should n't they be allowed to ? Do you also not think the culture to taking the drug will change with OOV ? OOV Main cause of car crashes is cars , so we should outlaw OOV The world is full of risks , you have to deal with that. OOV Every case study I know of OOV this but OOV OOV Tell someone who drives for leisure they are killing the OOV as if you are a member of England & Wales Greens , the driver will likely get OOV OOV Who said you can ? It 's more understandable why you made a stupid decision but you still made that decision and your prior choices led to that point of OOV it is still there OOV OOV How are you OOV by a person who is

high walking past you ? How are you OOV by a person who is drunk walking past you ?

### 3 False negatives (Type II error) (AH as delta) 23

#### 980\_ah\_t1\_diapclz.json (ah-delta)

(OOV\_comment\_begin) Target left because they were OOV about logistics and could n't keep their stores OOV They got greedy in trying to take over all of the OOV leases at once , and should have built up more OOV Future Shop and Best Buy have been the same company since Best Buy bought them in OOV The “ merger ” is just a branding change. Grand and Toy was also bought by a US company ( Office Depot ) . As to rising prices , overall inflation in Canada last year was [ 1.6 % ] ( http : OOV ) and Ontario 's unemployment rate is [ 5.8 % ] ( http : OOV ) which is not very bad at all .

(OOV\_comment\_begin) The Logic and OOV of Calculating the Inflation Rate It feels like we need to rethink how much weight we put onto the OOV inflation rate ( s ) , and look for more reliable numbers to see our arguments off. ” But even the Bank of Canada has grown unconvinced by the official inflation OOV In its latest Monetary Policy Report its quarterly publication on the state of the Canadian economy the central bank noted that even its core measure is being skewed by the temporary effects of currency fluctuations , spikes in meat and communications prices , and aggressive competition among OOV ” https : OOV

(OOV\_comment\_begin) I 'm happy to get into the weeds with you. If we are , we should begin by noting that OOV is not the producer of the inflation data. Stats Canada is responsible for producing the data. OOV is a consumer of that data ( and has greater needs than most consumers , as they have broad responsibilities for monetary policy ) . That said , the Bank of Canada does produce a very nice website which lists all the measures you could want in one handy chart ! [ Here it is. ] ( http : OOV ) Every measure they produce is between 1.1 % and 1.6 % inflation as of last month. That 's actually a remarkably narrow range , and indicates very strong confidence that inflation is almost certainly around 1 and a half percent , give or take a bit .

#### 952\_ah\_t1\_deytcu8.json (ah-delta)

(OOV\_comment\_begin) Maybe but I think that America 's changing demographics are threatening enough to many of them that Republicans will dominate among them for the foreseeable future. Similar to what happened in the south in the 60s .

(OOV\_comment\_begin) Then the democrats are lost , and doomed to fail as a party. Its just numbers. Whites a still a large majority in this country , a political party that does not cater to their political views is a political party that will lose every election they vote in. What happened in the south never reversed ; that section went permanently OOV There is a very good chance this will happen again with northern blue collar workers and farmers ; if that does it will be OOV , OOV difficult for the democratic party to win OOV Like , ever again. Or in other words , the party will be dead and gone. OOV to exist. No , the democrats should be OOV that white people will start voting in lockstep , the same way they have tried to train other racial groups to. The chickens are coming home to roost , and the dems are utterly fucked .

(OOV\_comment\_begin) Not OOV Firstly , the idea that the Democrats are the ones who have turned race into an issue is wrong. Republicans have appealed to white voters just as much as Democrats have appealed to OOV The difference is that white voters are seen as the norm so the Republicans do n't think anything has OOV Plus Democrats have won the popular vote on 6 of the last 7 OOV That is n't OOV And also there are plenty of white people that share Democrat values .

### 783\_ah\_t1\_dcurm1l.json (ah-delta)

(OOV\_comment\_begin) You can believe that , and it still does n't justify calling for violence against people who peacefully disagree with you. Once peaceful discourse stops then violence is justified .

(OOV\_comment\_begin) You seriously think OOV “ peacefully ” disagree ? So we have to wait for the OOV to first be violent before handling them ? The whole ideology of OOV rests on violence. If someone is marching around your house with a gun saying “ I want you to die ” are you going to wait until they shoot to act ? The freedom of speech should be defended , but there is definitely a line. We can use context and history to make a decision that is n't “ well , freedom of speech so whatever ” .

(OOV\_comment\_begin) OOV I do n't see Nazis going door to door to do killing OOV I do n't see any organized effort from the OOV to commit violence on their OOV I see that happening on the left though. ¿ So we have to wait for the Nazis to first be violent before handling them ? I 'm getting really tired of this false OOV You do n't have to be violent to oppose OOV This country is founded on free and open debate. So debate them. Shut down their OOV Make your opinion known to any platform that gives them a stage. Violence is n't the only OOV OOV even if a whole ideology rests on violence it does n't mean the person advocating it is acting violent , and it does n't mean you have the right to silence them with force. They are free to say “ I want you to die. ” They are not free to say “ I 'm going to kill you. ” That 's the difference between a threat and free speech. OOV Who gets to decide where the line is ? Rights are there to protect all of us. Once you start OOV them for different groups who becomes the arbiter of what is protected ? Currently the government is that arbiter and they have many checks and balances against abusing this power .

### 285\_ah\_t1\_dccmvar.json (ah-delta)

(OOV\_comment\_begin) I have yet to humor your call for more sources when you OOV deny OOV of the sources already OOV Why would I waste my time with that track record ?

(OOV\_comment\_begin) If someone offers you 7 boxes , you open the first and it 's full of shit - are you going to open the others or stop taking boxes from them ?

(OOV\_comment\_begin) I said you had the right to be lazy and not open the boxes , but if someone tells you that one of the boxes may contain something of value you may want to open them. It is also unreasonable to demand new boxes if you have n't opened the ones in front of you. ( Also this is a cute analogy , but it is just now how valid arguments work ) .

### 191\_ah\_t1\_cycx5fe.json (ah-delta)

(OOV\_comment\_begin) Actually , the “ barista with an English degree ” is a fair OOV There are college degrees that do n't lead to much of a paycheck if the person with that degree is lucky to find a job in that field at all. These are the people who are first in line to vote for any candidate who gripes about the cost of the college education , when they were the ones who were such total snobs about their choice of major that they thought the student loan to paycheck ratio would n't apply to them. Getting a certificate from a good trade school still leads to opportunity for a better paying job than many college degrees and the military discipline of OOV 's plan will have the added benefit of knocking some humility into the OOV types .

(OOV\_comment\_begin) Maybe its better to acknowledge that our current college funding system is inherently OOV The rates for college tuition have increased significantly faster than inflation , while wages have remain rather OOV While people in the 70s and 80s could go to college without having to worry about crippling debt , the same can not be said today. Ideally , higher education should be completely publicly funded with tax payer dollars , do away with the tuition system OOV It 'll be A LOT cheaper and a lot more effective than the system OP came up with. OOV This is again , conservative OOV Its the typical “ moral decay ” that the older generation and the conservatives believe are affecting the next OOV Its a phenomenon that has existed all throughout history , and ultimately , those who buy into the moral panic are all full of shit .

(OOV\_comment\_begin) This is n't about the “ moral decay ” OOV It 's about the fact that there have always been

prima OOV throughout history and we would n't have to suffer their presence if we had a reliable way to knock some humility into people who exhibit this kind of behavior .

#### 840\_ah\_t1\_di41gxx.json (ah-delta)

(OOV\_comment\_begin) In theory , having the morals and sense of a community that religion is supposed to provide is always a net OOV It becomes a negative when the religion becomes a barrier to progress. For example , in many Muslim societies where women are not allowed to work , around half of the potential labor force participants are cut out , which greatly lowers the nation 's productivity .

(OOV\_comment\_begin) Can you please list the Muslim countries where women are n't allowed to work ?

(OOV\_comment\_begin) Turkey - 30.5 % labor force participation Saudi Arabia - 13 % of total labor force Qatar - 51 % labor force participation ( higher than I 'd realized ) Iraq - 16 % labor force participation

#### 912\_ah\_t1\_dizyld7.json (ah-delta)

(OOV\_comment\_begin) It 's just funny you imply in one line that OOV against men are offensive to you , but in the very next you dismiss women who feel offended ( or as the internet has decided to OOV it , " triggered " ) and imply that they need to have a thicker OOV You 're proving the OP 's point : OOV Next : OOV No ? Because I can understand how hateful behavior or rhetoric can trigger a OOV response ? The behavior of Congressional Republicans causes OOV stress and anxiety which makes me feel ill , it 's not a difficult mental leap to apply empathy to people who might feel OOV Maybe address their feelings rather than dismiss them ?

(OOV\_comment\_begin) I did not imply that jokes against men are offensive to me , I am rather egalitarian in that regard and think nobody should get all worked up over OOV You are being triggered and having OOV responses to jokes and my opinion ? Why are you so different than my female cousin who is a doctor , or my wife who runs a business ? I will address your feelings right now , lets OOV I hate to say this , but I do feel as though I am talking down to you a bit , I feel that I have to soften my tone and treat you different because you are so OOV In your opinion , are you sensitive because you are female ? I do not believe you are sensitive because you are OOV I do believe it is because you are kept in a state of anxiety from the very people you turn to for OOV You are constantly bombarded with people whispering in your ear and telling you that everyone is out to get you , so you have become hypersensitive to the comments and read insults and bigotry in everything you read. What is it that is causing you stress and anxiety to the point of illness that Republicans in Congress are doing ? I am not a big fan of the government , but I have been trying to figure this out for a while. What exactly is it that is making you sick with worry ?

(OOV\_comment\_begin) OOV Then why bring up the jokes against men as a reason for you being egalitarian if it did n't bother you ? OOV No , I find this whole exchange really amusing , especially with you condescending to me while OOV failing to understand my OOV Stress and anxiety can trigger physical sensations , that 's basic OOV To skip ahead for a moment to illustrate my point : OOV I 'm a OOV If the Healthcare bill that passed the House passes the Senate , the analysis of the bill says that I could expect a \$ 5000 premium hike if community rating is OOV I 'm trying to move in with my significant other , who is still in school and ca n't work full time , so I 'll be expected to take on more than his share of the OOV With my savings , we can just barely make it until he graduates and get a job , but with a \$ 5000 premium hike , we 'd be OOV That OOV me OOV , I get headaches and sick feelings worrying about whether we 'll be able to make ends meet or whether I 'd have to skimp on healthcare OOV I OOV So , going back to the above point , I know how a OOV of OOV can be threatening to OOV health , so I 'm more empathetic to the claim that a difference of opinion can affect other people 's health. OOV First of all , I 'm a guy. A white guy. A white guy who can make jokes about how the world would be better if we killed off all white men because we 're so terrible without getting triggered by it.



Second of all , I 'm “ so sensitive ” because I have OOV for \*the struggles of other OOV Because rather than tell people why they feel the way they do and why they 're wrong , I listen to them and try to understand where they 're coming from .

#### 464\_ah\_t1\_dlt66lv.json (ah-delta)

(OOV\_comment\_begin) I was unintentionally vague , and apologize for that. “ Why you do n't need feminism ” , and the other videos were from OOV 's OOV I was referring to them to show how his views are opposed to that of OOV 's older audience , and her own , and her failure to comment on this OOV People would be a lot less mad if she addressed this. It is not like love is never found in unlikely places , but this is sort of like when Gloria Steinem got married after decades of dismissing marriage as an institution that destroys OOV They are both public figures and people want an OOV The OOV documentary is a sanitized look at the mens rights movement at best , and propaganda at OOV Just googling it will show you a bunch of reviews which will tell you as much , which is why it is a bad look. Men do have a lot of problems , but the documentary offers no solution , it just blames OOV It is completely uncritical of some of the worst offenders like Paul OOV From the Village Voice review : OOV It was also mentioned by the OOV as a misogynistic site in their intelligence report. https : OOV All this is easily visible from a cursory glance through a couple of google pages , and this bad press will stick to her .

(OOV\_comment\_begin) OOV OOV how ? Show me evidence of any time a men 's rights group has called in bomb threats to a feminist gathering ? Oh right you ca n't because it 's never happened. But feminists did that to a men 's rights OOV And I know you 're going to say “ but those were the extremists thats not every feminist ” but here 's the thing. Nobody gives a flying fuck about the silent “ moderate ” OOV I saw no feminists standing up and denouncing that what happened was wrong. Their silence is saying they support what happened. OOV And feminism claims to be fighting for men 's rights but that 's a bold faced OOV Name one men 's issues that feminism has addressed ... oh right OOV Instead feminists have OOV fought against men 's rights supporters such as calling in a bomb threat to a small forum and on top of that feminists shut down a plan to build a men 's domestic violence OOV Feminism is a OOV Women are n't oppressed and the most recent major “ oppression ” they 're fighting is OOV .

(OOV\_comment\_begin) OOV http : OOV Largest mainstream feminist organization in the USA , and this is their agenda , not OOV OOV I said it was sanitized because it did n't ask obvious questions , let alone hard ones. Any response to Elam 's quote in the previous post ? That is an obvious question , not a hard one. Those conferences will be protested as long as people like Paul Elam are involved. Calling in a bomb threat is a very irresponsible way to respond OOV OOV https : OOV Ruth Bader Ginsburg , co-founder of the Women 's Rights Project at the ACLU , and now Supreme court justice. Leaving our beliefs aside for a moment , which one of our views do you think the larger media houses share ? Or schools , or other ( likely liberal ) institutions which will hire outspoken sex educators like OOV Green ? If not sharing the views , they must atleast keep up OOV She could end up OOV ( even unfairly ) for these associations .

#### 919\_ah\_t1\_d1sswix.json (ah-delta)

(OOV\_comment\_begin) Except we hardly do. The amount of the budget they get from my underfunded public high school is so OOV Slice it half and it 's still more than our AP programs. I 'm not saying leave them to die just stop glorifying them , stop giving them so much useless nonsense so they 'feel good ' , and stop taking away from people with potential to give yourself a god damn pat on the back .

(OOV\_comment\_begin) Hardly do what ? I ca n't express my thoughts well enough to really explain my point i 'm afraid , however honestly , I remember having a similar viewpoint when I was OOV Very this makes more sense , this would be more efficient , more productive , more OOV However now I look at it more like if we did everything for the sake of productivity and logic , it would be a very boring and unhappy world .

(OOV\_comment\_begin) Oh I disagree , sir. In this regard specifically I doubt it would make anything worse. Outside of little parades and parties have you ever been positively affected by a mentally retarded person ? There are certainly places where life needs a little emotional and OOV but this is hardly the place. Chop their funding and stop giving them their own dances and benefits. How about give them a little place at prom or something where social protocol pretty much

forces us to give them a 5 minute standing ovation ? They get their 'real kid ' experience and a little feel good moment. Anything more is stupid and for the sake of glamour and misplaced OOV We will only gain from doing this I 'm pretty sure. I 'm pretty out of touch with people 's general feelings so I really do n't know if taking away their parties will have a real impact .

#### 161\_ah\_t1\_dk96xca.json (ah-delta)

(OOV\_comment\_begin) Well recently Cuba discovered a vaccine against lung cancer , something any other country has ever dreamt of. Of course it was OOV An economic system does n't influence science OOV They are quite OOV Going back to what I was saying , Cuba is quite the example of a well implanted communism

(OOV\_comment\_begin) Your comment actually made me think a bit OOV The 21st century communism is actually good but that 's just because it had time to OOV The same thing could 've happened to Nazism and a 21st century Nazism could be actually as good as communism if we eliminate the racist and homophobic ideas .

(OOV\_comment\_begin) What ? You just said an ideology based in killing all races except one would evolve to a better system ? Explain it please , because I do n't understand. If OOV would be like capitalism nowadays , there OOV would be one race , and biological diversity in our species would be 0 , leading to future genetic OOV Communism was meant to be good. To work like it does in Cuba , to distribute wealth and grant free university ( where people from lots of other countries go to study medicine , so it ca n't be really bad ) .

#### 474\_ah\_t1\_dbw46w0.json (ah-delta)

(OOV\_comment\_begin) OOV Have you read the actual publications of the Russian Fox experiment ? If so what controls were set in place to make sure that this experiment was influenced by nothing but genetics ? A population of wild animals being bred and raised in captivity is an environmental factor of immense OOV OOV Scroll down and read the section titled OOV

(OOV\_comment\_begin) [ Dr. OOV OOV ] ( https : OOV ) stated that , [ “ Through genetic selection alone , our research group has created a population of tame foxes fundamentally different in temperament and behavior from their wild OOV ” ] ( https : OOV ) . I realize that her own credentials pale in the face of someone pursuing a “ medical doctorate ” so if you have evidence of environmental variables affecting the conclusions , I 'd love to hear them , as would , I suspect , OOV OOV Physical and biological ailments can of course affect OOV That does n't change the fact that IQ is 75 % heritable in the absence of them .

(OOV\_comment\_begin) OOV If you think this contradicts my point then you misunderstand what she means by this statement. She is saying that these foxes , due to selective breeding of heritable traits which favor OOV , have essentially become the OOV equivalent of the domestic dog. In other words , their genetic make-up , which has been artificially changed through selective pressures , has created a population of foxes with a genetic predisposition towards OOV OOV tame behavior however , relies on more than just a genetic OOV The foxes have to be raised around humans , fed by humans , touched by humans , and experience various other OOV components involving humans in order to become OOV It is the exact same way with OOV Feral populations of dogs have the same genetic make-up as OOV dogs , yet they are often very fearful of and aggressive toward humans because they were not raised by OOV The purpose of this experiment was to show that domestication of dogs likely occurred due to artificial selective pressures rather than natural selective pressures , not that individual animal 's behaviors are determined solely by their OOV OOV OOV are only one type of environmental influence that affect OOV There is plenty of evidence that there are a multitude of other environmental factors influencing a persons OOV The article you reference lists several OOV OOV I think you misunderstand the role that genes and OOV play on phenotype and behavior. I stated earlier that genes do not determine anything , which was admittedly poor wording , so I will clarify : Genes do not determine specific traits , genes provide OOV for specific

OOV OOV is the proportion of variance in a trait which can be attributed to genes within a specific population in a specific environment. The fact that IQ is 75 % heritable means that , of the factors influencing the OOV of IQ within a OOV , 75 % of those factors can be attributed to genetic OOV It does not mean that an individual person 's IQ is 75 % genetically OOV We do not know and may not ever know exactly to what degree our traits are influenced by genes vs the environment. It has been the subject of continuous debate amongst researchers since the discovery of OOV That being said it is generally accepted among scientists that our traits arise from a combination of both. Though there may be evidence of differences in genes linked to variance in traits such as IQ among different racial groups , to come to the conclusion that it is the reason for lower IQ scores on average is a huge OOV It does perhaps warrant further research into the topic , but the problem with that is that it deals with a subject for which it is very difficult to avoid an implicit bias and therefore come up with valuable objective data .

#### 1099\_ah\_t1\_cpux4m2.json (ah-delta)

(OOV\_comment\_begin) The equation is not useless in itself , since the way the probabilities are set up are OOV Seems like the main issue you have is simply how the variables are OOV Which makes sense. But the beauty of the equation is that you can at the very least estimate the variables based on our existing knowledge of the universe and over time hone in on better estimations of the OOV So here are the variables : OOV  $f_p$  = the fraction of those stars that have planets  $n_e$  = the average number of planets that can potentially support life per star that has planets  $f_l$  = the fraction of planets that could support life that actually develop life at some point  $f_i$  = the fraction of planets with life that actually go on to develop intelligent life ( civilizations )  $f_c$  = the fraction of civilizations that develop a technology that releases detectable signs of their existence into space  $L$  = the length of time for which such civilizations release detectable signals into space Of those ,  $R$  ,  $f_p$  ,  $n_e$  , and probably  $f_l$  can be reasonably estimated with our current knowledge.  $f_i$  ,  $f_c$  and  $L$  we do n't know about , but can maybe assume is OOV If we assume they 're non-zero and can reasonably estimate the others then we can at least establish OOV non-zero number. So it does n't really matter how small those numbers are , just that they 're OOV The reason we are allowed to assume those values are non-zero is because we exist. So it seems logical that odds are there are others out there. The bag of envelopes has one black spot , so it makes sense to believe that there might be at least one other black spot in a bag of that many OOV Does n't mean it 's true , but statistically speaking it 's OOV That 's the whole point of the Drake equation , not a set value of how many OOV are out there ... just that odds are there 's something else out there .

(OOV\_comment\_begin) OOV It matters. OOV is OOV OOV I do n't think you can justify that .

(OOV\_comment\_begin) OOV Multiply that by whatever gigantic exponential you get from how many stars exist in the universe and how many potential planets they have , and it starts to point towards a  $\geq 1$  solution. OOV Can you more easily justify that there are no other black spotted envelopes ? Just because you open a billion envelopes out of " OOV " and do n't find one is n't any better justification to say there are n't any more .

#### 1214\_ah\_t1\_d0n7iz4.json (ah-delta)

(OOV\_comment\_begin) My wife and I have been married for five years , together for OOV We have a four-year old. I earn enough on my own to make a comfortable middle-class OOV I 'm also completing a graduate degree at night , so my income should increase further from here. My wife never began a career because she spent the past four years as a stay-at-home mom , providing stability and comfort for our child while I worked long hours and furthered my education. Today , she works part time at a fabric store while our child is in OOV Her income is a help to our household , but strictly speaking we do n't need it. We rent because my job may require relocation , and has in the past. If we divorced , she would be OOV Sure , child support would help , and if she cashed in her share of the 401 ( k ) it would last a while , but she 'd be OOV She 'd probably need to move back in with her parents several hundred miles away , at least temporarily , taking our child away from not only her dad , but also her friends and her school. It would magnify the pain of an already terrible situation. No health insurance , no retirement , no home. She would be starting from scratch with no real work experience , in her early OOV OOV would help her find

a small apartment in our town so we could still OOV as best as we could. And you can bet that a good divorce lawyer would fight to make that alimony payment contingent on them staying local , if I as their client made that a OOV OOV is one tool in a very large toolbox to minimize the total harm done to all OOV Now it may be being imposed more often than is appropriate , I do n't have any data on this. But it would be absolutely be appropriate in our case .

(OOV\_comment\_begin) She would n't be taking the child. OOV , She would be choosing to leave tell child .

(OOV\_comment\_begin) I do n't have the time or ability to be a full-time single OOV I certainly would n't put her in daycare when she has a loving capable mother. In our situation , if you wanted to minimize harm , she would get primary custody .

#### 1096\_ah\_t1.ct4adkd.json (ah-delta)

(OOV\_comment\_begin) What are the rich imposing on the poor ? You seem to have a very strong opinion but are n't giving me anything to work with that would help me see your point .

(OOV\_comment\_begin) OOV You think that 's not an imposition ? Read what I OOV I realize it 's hard to be presented a reality you deny , but you can focus and read my comment - even multiple times if need be .

(OOV\_comment\_begin) They dont own the workers and force them to work a “ OOV ” OOV The whole idea of a living wage varies based on a persons OOV A single male age 23 might be fine at an \$ 8 an hour job , not a life of luxury but comfortable enough , but if he ends up with 2 kids by 26 and that same wage does n't put food on the table. I 'm sure it would be wrong for the owner of the company to discriminate and only hire those without dependents to work that job ?

#### 653\_ah\_t1.d1dlru6.json (ah-delta)

(OOV\_comment\_begin) Okay , so I 'm absolutely not arguing for terrorist suspects to be interrogated on bs grounds such as they are muslim in the US and said “ -- ” which loosely can mean this. I 'm talking about terrorists we capture overseas , in America , or get from other countries. KNOWN OOV WITHOUT A OOV OOV Yeah , I understand occasionally there will be red herring but for the most part of we find definite proof of activity or maybe have visual proof , they should be tortured to find out what the know. Additionally , they should not be given basic human rights until they begin to cooperate and spill information. Btw I 'm a liberal , but not too left , so please none of that OOV garbage I get from other OOV This would help protect thousands of others who could maybe die at the cost of a few OOV Edit : Hey so I am seeing many comments about torture not being effective , and I would like to add that we could easily feed the terrorists questions that they may know , but we already do know , intel that we may have. If they are blatantly lying to get us out of their hair then we know how its going to be. I believe that the potential to find real information alone is good enough cause to do whatever. \_\_\_\_ OOV

(OOV\_comment\_begin) Hey so I am seeing many comments about torture not being effective , and I would like to add that we could easily feed the terrorists questions that they may know , but we already do know. We could have captured multiple terrorists , etc. there are ways to verify the information

(OOV\_comment\_begin) The Senate Intelligence Committee report basically says that the CIA 's use of torture did not actually produce any useful intelligence at all. Do you seriously think no one in the OOV ever had the idea of “ let 's ask them other questions to check if they 're faking ” ? Do you honestly think that you 've just personally come up with an idea that the most well-funded intelligence agency on the planet never thought to use in its interrogations , and that this tactic would make a critical difference between whether we get useful intel or not ?

#### 292\_ah\_t1.d2v4t3t.json (ah-delta)

(OOV\_comment\_begin) We have a republic ; we vote in people to legislate for us because it is n't possible to vote on every individual OOV Why am I hung up on the presidency being based off a popular vote ? Because it could be OOV OOV done without requiring any major changes to our government. Whether major governmental changes should be done is an entirely different topic .

(OOV\_comment\_begin) Yeah , dude , I 'm not saying it 's reasonable to vote directly on every OOV I 'm saying the number of representatives a state gets in the legislature is identical to what they get in the OOV Therefore , the states that

are “ OOV ” when we pick a president are identically OOV when it comes to drafting and voting on laws. And that OOV has surely manifested itself way , way , way , way more times in our country ’ s history than the four times it has in the presidential election. Fixing this could OOV be done very easily , by eliminating the Senate , as I ’ ve said countless times now. Why are you insisting it would mean some major reorganization ?

(OOV\_comment\_begin) Jesus christ man ; OOV states are arbitrary OOV They do OOV represent us equally even with OOV Wyoming has almost 600,000 people and has one state OOV Within the boundaries of that state , the population could be 100,000 or lower even and they still would have that one state OOV It could have 5 people in the entire state and they would still get a representative because of the state OOV To have a system that is truly a proportional representation , OOV would need to be done away with because they are artificial boundaries .

#### 652\_ah\_t1\_dmxb7my.json (ah-delta)

(OOV\_comment\_begin) Like I said : it does n’t make sense. You were never a victim of that word ; you are not being empowered by using it , and it ’ s not for you to reclaim it .

(OOV\_comment\_begin) But I was influenced by it , through black art. And now I aspire to it , and you know lots of teenagers aspire to it , so I totally get its use in said circumstances

(OOV\_comment\_begin) I do n’t get your implied sense of entitlement here. Your CMV makes it out to be some kind of grave injustice if white people ca n’t also use the term. If you use a term that a minority has reclaimed for themselves , you essentially take away some of their sense of empowerment that they get from it. It ’ s a denial of its historical meaning as a tool against oppression .

#### 228\_ah\_t1\_d6q2dh8.json (ah-delta)

(OOV\_comment\_begin) Even if it were the viewpoint of someone with depression , it does n’t follow from that that the idea is OOV Also , it seems that you are asserting that the OOV of being human outweigh the downsides without giving an argument or evidence. It does n’t seem self-evident that that ’ s true ...

(OOV\_comment\_begin) Evidence ? It ’ s an opinion. If you ’ d rather be a goldfish or a tree go ahead and think that and I ’ ll go ahead and think you ’ ve not thought it through. I ’ d rather be burdened with the knowledge I ’ m going to die and prepare for it than be a tree and just die OOV Evidence though ? If you ’ re asking for evidence in something so philosophical I ’ m going to presume you ’ re halfway to the tree in intelligence anyway .

(OOV\_comment\_begin) Your insult notwithstanding , I ’ m not sure this is the right sub to just give opinions that you do n’t argue for. What I was saying is that if you want your opinion to be taken seriously , you ca n’t just say that the human experience is “ better ” than the tree ’ s experience and not ( 1 ) define what you mean by “ better ” and then ( 2 ) explain why humans fit that definition better than trees do ( perhaps by using some examples to illustrate : i.e. evidence ) . As for you calling my intelligence into question , I ’ m tempted to not respond to such an impolite comment on a sub that values dispassionate discourse , but suffice it to say that I am a doctoral student at a tier 1 research OOV In any case , I ’ m not even disagreeing with what you said originally , I was just saying that in a sub like this it seemed like it should be just a little more backed up with reasons why you believe what you said is true .

#### 194\_ah\_t1\_cnjqoug.json (ah-delta)

(OOV\_comment\_begin) We are in OOV not OOV or OOV A big part of arguing a point , is better understanding the point you are arguing OOV It is good form to clarify , and question your opponents view so that you understand them. Take our interaction as an example - you ’ ve literally no understanding of my position on this OOV I think that approach is a OOV If that process offends you , this might not be the right sub for you. At this stage , I ’ m not sure what to tell you - there was no need to make our interaction OOV At least not until we work out OOV we OOV OOV .

(OOV\_comment\_begin) OOV So when some one replies to someone making an argument here , we make the assumption that that individual is trying to ... I do n’t know , what ’ s the phrase again ? Oh that ’ s right , “ Change Their View ” .



(OOV\_comment\_begin) Or understand that view , questioning their claims to have a fuller understanding of that view before attempting to change it. Or maybe even deciding not to. I 'm getting a weird sense of deja OOV I think you 're digging a hole here. And since this interaction is n't really serving to benefit the issue being discussed in this thread , I 'm just going to end this OOV Have a good weekend .

#### 1042\_ah\_t1.ctsjghr.json (ah-delta)

(OOV\_comment\_begin) Do n't be gay and in the OOV They straight up do n't fit together  
(OOV\_comment\_begin) Er the UK Army is actually fine with LGBT people openly OOV We have never had DADT and you have been allowed to openly serve since 1999  
(OOV\_comment\_begin) Legally , yes , it 's acceptable to be gay in the OOV However , there is an overwhelming amount of gay " banter " in the OOV You 'd be better to join the bender squad ( navy )

#### 188\_ah\_t1.dfk4ok8.json (ah-delta)

(OOV\_comment\_begin) He did n't change my view about anything .  
(OOV\_comment\_begin) You : There is not a single rational reason for a citizen of the developed world to continue eating red OOV Him : Well , you said " there is not a single rational reason " and that is , in fact , a single rational reason. You do n't have to be a OOV to weigh pleasure in the " pros " side of a rational decision. You : OOV are OOV Face it , he CMV 'd you but you 're too proud to award him his delta and you know the mods are too busy OOV for curse words that they wo n't notice you OOV .  
(OOV\_comment\_begin) My view was already changed OOV If he were to change my view he 'd have to change it back to " there 's no rational reason " . Also , he offered really no new information to the point by the guy I first answered to , so if anything that delta thing should go to that first guy .

#### 142\_ah\_t1.d67o6tc.json (ah-delta)

(OOV\_comment\_begin) OOV You said " It 's easy to say you 'd kill 5 , but that 's not the same thing as doing it. However good motivation could change my view. " You believe that " killing an innocent is wrong " is a good motivation , yet I 'm still not seeing any OOV OOV Earlier he acknowledges that " It gets a lot more tempting with more people " and that he would " certainly see why that 'd compel a person to act if it saves a thousand lives instead of just five " . I do n't know exactly how that makes him a OOV OOV You already admitted that you shifted your OOV But for some specific examples : - You said you 'd " like to see someone verbally admit that killing 5 makes sense to them " - Now you want me " to find a real event , where a person faced a OOV choice and chose to do nothing " - You said you wanted an example of someone " who claimed that they would kill 5 " - Now you 're saying that is n't good enough because there " is a pretty big gap between saying you believe something and actually believing it. " - You said " I can also vaguely conceive that someone would hold that view. But that does n't mean somebody actually does. " - I showed a bunch of people who hold that view. Now you 're saying " I assure you , I already knew about those people. " - You said " there is no moral system ( that somebody actually uses ) which would prefer killing 5 for 1 " - I showed a OOV moral framework ( that people actually use ) which supports not throwing the OOV Now you want to hear a person say " my heart says that doing nothing would morally be the the right thing to do " rather than a moral framework OOV You claim : - You would " seriously choose to kill 5 to save 1 " - You would " definitely choose to save 5 " These directly OOV OOV " Killing " is a word used to refer to a specific act that occurs in a real OOV OOV You acknowledged that throwing the switch constitutes the act of killing OOV Why do you think it 's unreasonable for someone to connect that to " killing is wrong " - j " I should n't do this " ? OOV So to clarify :

you do think that there are some people would choose to do nothing. OOV This makes no sense though , because I've shown over and over again many people who obviously understand the problem , are n't confusing it with the fat man variant , and OOV would n't throw the OOV Not to mention all the professional philosophers who obviously understand the problem since the " trolley problem is philosophy 101 " . - [ Judith Jarvis Thomson ] ( http : OOV ) - [ reddit user OOV ] ( https : OOV ) - [ Clark Giles ] ( http : OOV ) - [ reddit user OOV ] ( https : OOV ) Either : - All these people are lying - Or your conjecture that " there is nobody who would actually refuse to flip the switch " is OOV OOV " killing an innocent is wrong " is a completely foreign sense of morality ? OOV One nice aspect of the trolley problem is that it reduces the number of variables to a bare minimum , which helps to make sure " everyone is thinking of the exact same circumstances " . The falling plane scenario is a little different in that : - You put those people in danger when you decided to fly the plane - It 's much harder to imagine this as a binary decision. Why are the only options two specific sites ? You have enough control of the plane to land in two totally separate locations , should n't you have enough control to adjust how you land ? How do you know ahead of time exactly how many people will die in each scenario ? Someone in a car would have a pretty good chance at driving away , right ? Presumably crash landing into a parking lot is more OOV than crashing into an office building , does n't that factor into it ? Do you have a parachute , can you eject from the plane ? Because of all that , someone could say they would n't pull the switch in the trolley problem but OOV divert the plane and still be morally OOV OOV Two people who think X is not really great evidence that every single person thinks X. Especially since there are many , many , many , many examples of people who do n't think X. And on top of all that I've even shown real-world examples of instances where people displayed a " moral intuition " that was different from yours. OOV I've definitely brought up new points , you've just ignored them. I wrote up [ this post ] ( https : OOV ) you pretty much just ignored it .

(OOV\_comment\_begin) I do n't recall stating that " killing an innocent is wrong " is sufficient OOV I did pretty much call that sort of argument unacceptable in the last post , though. More importantly , I ca n't help but feel that you've built a straw man here. I know there are people who occasionally say they would kill 5. I know some of them are OOV I know others too try to present rational sounding OOV " I do nothing because killing is wrong " is the most obvious and trivial of these rational sounding OOV How did you even conceive that this argument would be unexpected for me ? I do n't know , maybe I said something that you interpreted as a request for just any single OOV But did it seem reasonable to you that this sort of thing would change my view ? Do you even understand what my view is ? Can you rephrase it ? OOV He said a lot of things in his OOV Most of them seemed OOV The lines you quoted are reasonable too. But I have no idea what purpose they're OOV Reasonable arguments do n't cancel out unreasonable ones. He may have only mentioned consistency once , but that 's enough to make me suspect that he 's just trying to fit into the framework he OOV OOV Those are mostly alternatives , and some of them seem perfectly equivalent to me , while others are not so much goalposts , as minor arguments I've used. And I think I said this already. First I wanted to talk to somebody who said they would kill 5. That did n't work out. OOV has n't replied to my PM either , which was probably to be OOV Second I asked you for a detailed and honest explanation by someone who said they would kill 5. That was intended as a substitute for a OOV Maybe I was n't clear on what that means ? " Detailed " is not the same as " long " . OOV moral frameworks is pretty much the opposite of " honest " . And an argument like " killing is wrong " is the opposite of " detailed " . It explains nothing. How do you define killing ? Why is one choice a killing , but not the other ? Where did you even get that rule from ? Does it make sense to you to talk in absolutes ? etc. So that did n't work out either. Seeing that , I propose a third OOV To present a real event similar to the basic trolley , where somebody chose to kill 5 , while not being obviously malicious or OOV I thought this would be easier for you , since it severely limits the number of problems I could find with some event you OOV But the old goalposts are still there. You're free to bring a person , or to find more explanations , as long as you understand why I rejected the previous

ones. OOV That 's pretty much my point. When you talk in absolutes errors of logic and generally ridiculous conclusions tend to come up. That 's pretty much why I find the motivation " killing is wrong " - i " I should n't do this " OOV OOV Yes , the " evil " and the OOV I thought we talked about this ? OOV " killing an innocent is wrong " is within my sense of OOV Instead , " I wo n't do something wrong no matter how bad the outcome is otherwise " would be OOV As would " when a choice is forced on me , I can do nothing and then bear no responsibility for what happens afterwards " . Such are the arguments I would need to justify killing 5. I find them completely OOV Do you disagree ? OOV There is absolutely nothing in the comment by OOV that would suggest he 's not talking about fat man. In fact , he probably is. Not sure what he is doing in your list. Other comments are longer and I may have missed something. Do you want to find some sort of evidence to back your claim ? OOV I think we use different definitions of OOV A variable is something that could OOV That is , something different people could assume to be different. I tried to explicitly fix a value of everything that could vary in the plane OOV On the other hand , in the original trolley , some could assume you 're the driver of the trolley or an operator of the system or a random OOV They could assume that the 1 and 5 knew which path was the default , when they chose there to go , or that the default path changes OOV They could assume that the 1 and 5 are professionals who knew the risk , or random people or victims tied to the tracks by a OOV Surely we agree that altering a few of these could change the choices of many people. Why does it seem weird to you that 10 % of people automatically make some of those assumptions ? And why is it wrong that I want to force everyone to be making the same OOV So yes , I made you a OOV Is that a problem ? OOV What other options could there be ? Do you want to crash into somebody 's house ? The center of a large town probably does n't have places less populated than parking OOV Also , I was thinking about the parking lot of that building , that is , they would be like 50m away from each other. I doubt falling planes have more OOV than that , especially by the time you 're low enough to tell where you 'll OOV OOV You probably do n't , but does it matter ? It seems obvious that crashing into a building will kill more than crashing into a parking lot. If you 're worried that crashing into a parking lot would kill nobody , then we could add a kiosk or security guard house. Is that better ? OOV I do n't think you could reasonably survive either OOV I myself like that you die after the choice. It prevents arguments about legal responsibility , which I do n't think should matter. But if you would prefer that , we can add a parachute and OOV Either way , the choice should n't change your personal OOV So if we make these modifications , will you agree that the plane scenario v2 is a fair representation of the original trolley , and then claim that there are good , sane people who would choose to do nothing , because " killing is wrong " ? OOV Are you talking about the man drowning after a dare ? Did that seem like " moral intuition " to you ? OOV I 'm not seeing anything new in that post. Just your usual criticisms of my criticisms of your old points. I ignored them because I wanted to try something different. But if you feel that there is something important I did n't address , you 're free to bring it up again .

(OOV\_comment\_begin) Earlier in this thread [ another user pointed out ] ( https : OOV ) that " there are people who chose to kill the 5 " which you said you " find false " . You clearly stated here that your view is that there are not people who choose to kill the 5 ( i.e. do nothing ) . [ You state this explicitly elsewhere too ] ( https : OOV ) : " My point is that there is nobody who would actually refuse to flip the switch " . I asked if " you do think that there are some people would choose to do nothing " and you clearly stated here that your view is " Yes " there are some people who would choose to kill the 5 ( i.e. do nothing ) . Since your stated view in these two cases are clearly different , I expect a delta .

## 227\_ah\_t1\_cx0hyfv.json (ah-delta)

(OOV\_comment\_begin) OOV So we should only call someone an artist if they can make enough money to support themselves on it ? Many famous painters and musicians did n't make enough to live off their art. OOV This seems like a OOV I agree with your general statement that all humans can be creative and to some extent refer to themselves as OOV But I do n't think it makes a lot of sense to call someone an artist based on their success in profiting from their art ,

capitalism is n't a great art OOV We can say that some artists are better than other in a general sense , but why ca n't amateur or learning artists call themselves artists ?

(OOV\_comment\_begin) OOV If someone is famous for their OOV they are making a living off of it. OOV Calling yourself an “ artist ” has become pretentious ( “ I ’m an OOV ” with a dumb beret and a smug face ) . In terms of a profession , the same way you should n't call yourself a house builder until you can build a sound home ( being able to make money off your craft now comes with the OOV OMG OOV IT ’S THE OOV ! ! ! ) , you should n't call yourself an OOV “ Starving artist ” is the tongue-in-cheek , proper term .

(OOV\_comment\_begin) OOV Definitely not true , many artists only become famous after they die , others become OOV Especially early recording artists who used to get really screwed over on record deals and barely made any money despite being OOV OOV It ’s pretty clear you have an idea of what artists are like in your mind which really does n't match up with reality ( again , a strawman ) OOV I think you ’re assuming that the term “ artist ” confers some degree of OOV You can be a bad artist , just like you could build a shitty house and can yourself a house builder ( whatever a house builder is. Carpenter maybe ? ) . Giving yourself the title of OOV just says that you can do something not that you can do it well. Anyone who makes art can call themselves an OOV That does n't mean that their profession is “ OOV ” Again your issue here seems to be that you assume that if someone does something they have to be able to do it professionally ( make money on it. ) But you can be an artist , writer , carpenter , etc. and not have that as a profession .
